# Supplementary material for: Gene Models, Expression Repertoire, and Immune Response of Plasmodium vivax Reticulocyte Binding Proteins
Source: PubMed Central journal article supplement (PMC4771344; doi:10.1128/iai.01117-15), 2016-02-24
Supplement: IAI.01117-15_zii999091596so1.pdf [file IAI.01117-15_zii999091596so1.pdf]

**Supplemental Material for “Gene models, expression repertoire and immune response of *Plasmodium vivax* Reticulocyte Binding Proteins” (Hietanen, Chim-Ong, et al.)**

This supplemental file is organized into 4 sections, including

1. Table S1. Transcript abundance of *Pvdbp* and *Pvrbps* in 15 *P. vivax* patient blood samples (page 2)
2. Table S2 Antibody levels against each recombinant PvRBP in 41 *P. vivax* patients (page 3)
3. cDNA sequences of *Pvrbp* genes in the GenBank Flat File format. ID of the parasite isolate from which a segment of sequence was derived is listed as misc\_feature (page 4-33)

|                             |              |
|-----------------------------|--------------|
| <i>Pvrbp1a</i>              | (page 4-7)   |
| <i>Pvrbp1b</i>              | (page 8-10)  |
| <i>Pvrbp2a</i>              | (page 11-13) |
| <i>Pvrbp2b</i>              | (page 14-16) |
| <i>Pvrbp2c</i>              | (page 17-19) |
| <i>Pvrbp2p1</i>             | (page 20)    |
| <i>Pvrbp2d</i>              | (page 21-24) |
| <i>Pvrbp2d<sub>ir</sub></i> | (page 25-27) |
| <i>Pvrbp2e</i>              | (page 28-30) |
| <i>Pvrbp3</i>               | (page 31-33) |

4. Alignment of *Pvrbp* cDNA sequences above against those of the Sal-1 reference strain (page 34-169).

For *Pvrbp2e*, which is absent from Sal-1, sequence alignment was made against the sequence of the Brazil-1 strain.

Alignment was generated by ClustalW ([www.genome.jp/tools/clustalw/](http://www.genome.jp/tools/clustalw/)). Predicted coding sequences was obtained from [www.plasmodb.org/](http://www.plasmodb.org/) for Sal-1 and [www.broadinstitute.org](http://www.broadinstitute.org) for Brazil-1 on 16 November 2015.

**TABLE S1** Transcript abundance of *Pvdbp* and *Pvrbps* in 15 *P. vivax* patient blood samples. Values were normalized by that of *Pvama1*.

| Sample | Gene         |                 |                 |                 |                 |                 |                |                 |                  |                 |
|--------|--------------|-----------------|-----------------|-----------------|-----------------|-----------------|----------------|-----------------|------------------|-----------------|
|        | <i>Pvdbp</i> | <i>Pvrbp 1a</i> | <i>Pvrbp 1b</i> | <i>Pvrbp 2a</i> | <i>Pvrbp 2b</i> | <i>Pvrbp 2c</i> | <i>Pvrbp 3</i> | <i>Pvrbp 2e</i> | <i>Pvrbp 2p1</i> | <i>Pvrbp 2d</i> |
| 1      | 0.218        | 0.179           | 0.170           | 0.074           | 0.206           | 0.545           | 0.168          | 0.984           | 0.145            | 0.528           |
| 2      | 0.156        | 0.960           | 0.670           | 0.783           | 0.420           | 0.642           | 1.540          | 1.968           | 0.284            | 0.519           |
| 3      | 0.277        | 1.220           | 0.580           | 0.956           | 1.684           | 1.371           | 2.702          | 1.014           | 0.443            | 0.565           |
| 4      | 0.325        | 0.244           | 0.137           | 0.145           | 0.449           | 0.870           | 0.297          | 0.879           | 0.285            | 0.478           |
| 5      | 0.251        | 0.239           | 0.161           | 0.207           | 0.128           | 0.865           | 0.213          | 0.744           | 0.373            | 0.550           |
| 6      | 0.173        | 0.914           | 0.940           | 1.389           | 0.457           | 3.131           | 1.827          | 0.815           | 1.092            | 0.578           |
| 7      | 0.161        | 3.948           | 3.562           | 15.43           | 5.682           | 3.811           | 9.147          | 5.589           | 0.441            | 0.856           |
| 8      | 0.129        | 2.486           | 1.232           | 0.895           | 2.033           | 0.896           | 2.920          | 2.394           | 0.278            | 0.880           |
| 9      | 0.325        | 0.438           | 0.211           | 0.339           | 0.470           | 1.745           | 0.968          | 1.554           | 0.593            | 1.272           |
| 10     | 0.194        | 0.413           | 0.286           | 0.336           | 0.689           | 1.075           | 0.758          | 1.079           | 0.389            | 0.827           |
| 11     | 0.819        | 9.569           | 5.492           | 4.446           | 0.821           | 35.42           | 16.72          | 1.462           | 18.38            | 3.003           |
| 12     | 0.376        | 0.530           | 0.412           | 0.556           | 0.855           | 1.274           | 0.798          | 1.044           | 0.297            | 0.577           |
| 13     | 0.306        | 0.201           | 0.121           | 0.346           | 0.399           | 0.840           | 0.397          | 0.516           | 0.285            | 0.467           |
| 14     | 0.372        | 1.275           | 4.740           | 1.295           | 0.638           | 1.843           | 2.436          | 0.797           | 1.054            | 1.393           |
| 15     | 0.284        | 3.051           | 2.070           | 0.807           | 1.037           | 9.881           | 3.046          | 2.550           | 1.226            | 1.663           |

**TABLE S2** Antibody levels against each recombinant PvRBP in 41 *P. vivax* patients.

| Sample | Age (yr) | Parasitemia (%) | Antibody level ( $\Delta$ abs/min) |         |         |         |         |
|--------|----------|-----------------|------------------------------------|---------|---------|---------|---------|
|        |          |                 | PvRBP1a                            | PvRBP1b | PvRBP2a | PvRBP2b | PvRBP2c |
| 1      | 50       | 0.06            | <b>0.208</b>                       | 0.113   | 0.106   | 0.176   | 0.575   |
| 2      | 37       | 0.07            | 0.033                              | 0.021   | 0.031   | 0.132   | 0.022   |
| 3      | 24       | 0.08            | 0.038                              | 0.034   | 0.055   | 0.183   | 0.377   |
| 4      | 24       | 0.2             | 0.056                              | 0.025   | 0.067   | 0.133   | 0.026   |
| 5      | 19       | 0.05            | 0.061                              | 0.026   | 0.039   | 0.183   | 0.041   |
| 6      | 32       | 0.02            | 0.088                              | 0.047   | 0.097   | 0.219   | 0.551   |
| 7      | 29       | 0.03            | 0.044                              | 0.034   | 0.047   | 0.138   | 0.039   |
| 8      | 28       | 0.29            | 0.178                              | 0.042   | 0.046   | 0.093   | 0.117   |
| 9      | 35       | 0.02            | 0.058                              | 0.042   | 0.038   | 0.150   | 0.120   |
| 10     | 18       | 0.01            | 0.089                              | 0.020   | 0.039   | 0.196   | 0.140   |
| 11     | 25       | 0.22            | 0.191                              | 0.016   | 0.065   | 0.236   | 0.448   |
| 12     | 46       | 0.01            | 0.177                              | 0.046   | 0.088   | 0.224   | 0.539   |
| 13     | 25       | 0.04            | 0.071                              | 0.031   | 0.025   | 0.029   | 0.029   |
| 14     | 18       | 0.09            | 0.048                              | 0.027   | 0.030   | 0.138   | 0.167   |
| 15     | 34       | 0.16            | 0.043                              | 0.015   | 0.055   | 0.180   | 0.212   |
| 16     | 22       | 0.01            | 0.062                              | 0.019   | 0.057   | 0.188   | 0.041   |
| 17     | 47       | 0.04            | 0.076                              | 0.017   | 0.132   | 0.195   | 0.509   |
| 18     | 20       | 0.05            | 0.054                              | 0.033   | 0.048   | 0.067   | 0.189   |
| 19     | 66       | 0.01            | 0.157                              | 0.191   | 0.153   | 0.244   | 0.621   |
| 20     | 24       | 0.07            | 0.099                              | 0.028   | 0.087   | 0.232   | 0.471   |
| 21     | 46       | 0.02            | 0.196                              | 0.090   | 0.048   | 0.247   | 0.162   |
| 22     | 55       | 0.33            | 0.046                              | 0.036   | 0.049   | 0.119   | 0.129   |
| 23     | 18       | 0.16            | 0.057                              | 0.021   | 0.037   | 0.193   | 0.034   |
| 24     | 39       | 0.03            | 0.121                              | 0.039   | 0.065   | 0.225   | 0.231   |
| 25     | 24       | 0.04            | 0.113                              | 0.025   | 0.087   | 0.159   | 0.243   |
| 26     | 26       | 0.05            | 0.198                              | 0.083   | 0.087   | 0.222   | 0.475   |
| 27     | 34       | 0.02            | 0.049                              | 0.058   | 0.042   | 0.177   | 0.170   |
| 28     | 42       | 0.14            | 0.051                              | 0.041   | 0.035   | 0.195   | 0.083   |
| 29     | 24       | 0.03            | 0.162                              | 0.055   | 0.072   | 0.212   | 0.362   |
| 30     | 39       | 0.14            | 0.261                              | 0.030   | 0.118   | 0.177   | 0.484   |
| 31     | 32       | 0.21            | 0.082                              | 0.054   | 0.047   | 0.086   | 0.044   |
| 32     | 25       | 0.38            | 0.121                              | 0.014   | 0.040   | 0.026   | 0.015   |
| 33     | 45       | 0.07            | 0.101                              | 0.043   | 0.070   | 0.160   | 0.204   |
| 34     | 45       | 0.07            | 0.096                              | 0.034   | 0.070   | 0.181   | 0.033   |
| 35     | 55       | 0.07            | 0.289                              | 0.050   | 0.197   | 0.262   | 0.505   |
| 36     | 60       | 0.16            | 0.072                              | 0.023   | 0.062   | 0.150   | 0.256   |
| 37     | 18       | 0.04            | 0.043                              | 0.039   | 0.028   | 0.043   | 0.040   |
| 38     | 25       | 0.17            | 0.061                              | 0.113   | 0.046   | 0.145   | 0.140   |
| 39     | 36       | 0.09            | 0.177                              | 0.097   | 0.069   | 0.130   | 0.563   |
| 40     | 23       | 0.02            | 0.153                              | 0.104   | 0.078   | 0.178   | 0.252   |
| 41     | 38       | 0.01            | 0.061                              | 0.041   | 0.054   | 0.135   | 0.216   |
| naive  | 35       | -               | 0.050                              | 0.036   | 0.012   | 0.026   | 0.022   |

LOCUS Pvrbpla 8502 bp mRNA linear INV 09-NOV-2015  
 DEFINITION Reticulocyte binding protein 1a cDNA, full length CDS.  
 ACCESSION Pvrbpla  
 VERSION  
 KEYWORDS .  
 SOURCE Plasmodium vivax (malaria parasite P. vivax)  
 ORGANISM Plasmodium vivax  
 Eukaryota; Alveolata; Apicomplexa; Aconoidasida; Haemosporida;  
 Plasmodiidae; Plasmodium; Plasmodium (Plasmodium).

COMMENT

FEATURES Location/Qualifiers  
 source 1..8502  
 /organism="Plasmodium vivax"  
 /mol\_type="mRNA"  
 /db\_xref="taxon:5855"  
 misc\_feature 1..335  
 /note="isolate VKBT95"  
 misc\_feature 336..1374  
 /note="isolate VTTY57"  
 misc\_feature 1375..1841  
 /note="isolate VKBT99"  
 misc\_feature 1842..3849  
 /note="isolate VTTY57"  
 misc\_feature 3850..4809  
 /note="isolate VKBT99"  
 misc\_feature 4810..6823  
 /note="isolate VKBT95"  
 misc\_feature 6824..7827  
 /note="isolate VKBT99"  
 misc\_feature 7828..8502  
 /note="isolate VKBT95"

BASE COUNT 3556 a 1151 c 1866 g 1928 t 1 others

ORIGIN

```

1 atgaaaaggg ggatttgcct agcagcgcct ctttgcctgt tcaactatth aggtgcaggg
61 cacggagaaa atgcagaaga agacataagg aatagcgaag ggaaagtaaa cttcttttcg
121 ctggattcta atttaaagaa aaataaaaag tcgaaacata atagggtgaa aagaaggaac
181 gcgaaaatth cgaactttct aagccaaaaa gcgatgtta aagaaacaga taacgcaagt
241 ggaaaagacg ctgaaggatc acgtccgtct catgattcat cgtttgtaa cttaaacggt
301 catgtcgatg gaaaaagtht atcatacagc gttcatgtaa aagaaagtac accacatagt
361 actacgcggg agagcacgga aaagggaaaa gaaaatgaga aaatacaggg tgtcctaagc
421 tcttttgtgc aaagccaaga agggggagaa tcagacgatt tggagggaaa gtacaattct
481 atagttgata tgagcgagaa actgaaagaa aatgataagt ataacctagt gtttgacatg
541 gagattgatt ttgttgactt acaatttttt aatctaattc tggagctgat tccaaaggac
601 agtaaatacc atacctacta tgaggaaaca cttaaacagc aagttacaga atacacaaat
661 tcgttgaaaa cgttaatgga ttcattgcata tctgaaaaag atcaaatgat catattagag
721 tatgagatta attatgcaa gaggaagtcc atagaaacag agacgttggg tgataaggaa
781 acaaaactct cagcagtatc tcaagcctat gcaatacatc tagaatcgta taagggagta
841 ttaaagccca aattaaatga tataaaaaat aatgcctttt cagttttgaa ggattcctac
901 tgaaggata actgtgggga atatgtgcag aaatataata caatgcgcaa gaattttata
961 tcaagttcag atcagtataa aatggaagca tatatgtaca ttccgaagag cattaacgat
1021 tatacagtgc tagataaaat tttatcagaa tctaacgaac taggtataga cattcaagaa
1081 aatgttaatt cgctgaagct gttaggagaa gaaattagtg aagtttccca tttgtatgtc
1141 attaacagta cgttaatgga cgatgcagcc aaaaaattag aatccataaa tgaagaggac
1201 gaatctgcag aatagattht acaaaaatth gaagataatt ccaaagcgct agcaacaac
  
```

|      |             |             |             |            |             |             |
|------|-------------|-------------|-------------|------------|-------------|-------------|
| 1261 | tactgcattt  | ttcaatacat  | aaaaacgctt  | aacgaaccaa | ttaagaaagc  | atatgaaagt  |
| 1321 | aaggtaataa  | aatctaataa  | actactgtct  | accattatag | acacgttagg  | aaaaagtgct  |
| 1381 | actgcgctgc  | aggagtcgac  | atttaataca  | gaggagtgca | ataaaattaa  | aaccgaagcg  |
| 1441 | gaaaaagtaa  | aagatgacgc  | tgaagatata  | tacgaaaaaa | atgaacagat  | atactacgaa  |
| 1501 | attccagaaa  | gtgaggacga  | aacaatagat  | gataagataa | acgatcttca  | gtaccttata  |
| 1561 | gaccaaataa  | aagattataa  | agatgaaata  | gtaaacaatt | cggagtcat   | ttctaataga  |
| 1621 | tataaaaata  | tatacgaaaa  | cttaaaagaa  | acgtatgaaa | cggaattaa   | tgatatagga  |
| 1681 | caactagaaa  | acgacacatc  | aaaagtaaat  | ttttatttga | tgcaataaag  | aaaaattaac  |
| 1741 | actgagaaaa  | cmetaataga  | tgaaagttta  | caaacagtgg | aaaaatttta  | caaagaaata  |
| 1801 | ttagatttga  | aagaaaaaat  | atatgaaactg | aagatagagt | ttgaaaaaag  | cgtcacagaa  |
| 1861 | ataaatcgat  | tacaggatgg  | ggaatctgcy  | cgtgatttac | atgaagaaca  | gatcaaagag  |
| 1921 | atattagaca  | agatggcgaa  | aaaggtgcat  | tatttaaaag | aacttctctc  | cttaaaaggg  |
| 1981 | aatcaagtg   | tgtacttcac  | cgaaatgaat  | gaattgctca | acacagcatc  | gtatgacaat  |
| 2041 | atggaggggt  | ttagcgctaa  | gaaggagaag  | gcggacaatg | acattaatgc  | tctatataat  |
| 2101 | tctgtgtata  | gggaagatat  | aatgctctc   | atcgaagaag | ttgaaaaatt  | tgtaaccgaa  |
| 2161 | aataaagaaa  | gcaactctgga | gatgctaaaa  | gatgaagaaa | tggaagagaa  | gctacaggat  |
| 2221 | gccaaagaaa  | cttttgctaa  | attaaatttt  | gttagcgatg | acaagctgac  | agatgtgtac  |
| 2281 | accaaataa   | gtgcagaagt  | gactaatgct  | gaagggatca | aaaaagaaat  | tgcgcaaaaa  |
| 2341 | caattcgaaa  | atgttcataa  | aaaaatgaaa  | gaattttcgg | atgctgtttc  | cacaaaattt  |
| 2401 | gaagcgttgc  | aaaacagcat  | gcagcagtac  | aatcaggagg | gagacgcgat  | agaaaagcat  |
| 2461 | aagcaaaaa   | gatccgaaaa  | ggaggaggaa  | tattttaaaa | atgaaagcgt  | agaagaagat  |
| 2521 | ctatccaggg  | aagaacagaa  | agagcaagaa  | tactactaac | ataagaataa  | ttttccaga   |
| 2581 | cggaaaggtg  | aatatcagc   | agaaattacc  | aacatgaggg | aagtcataaa  | taaaattgag  |
| 2641 | agccaattaa  | actattacgg  | ggttattgaa  | aaatatttct | ccctcattgg  | cgatcagaat  |
| 2701 | gaagtgtcaa  | cggctaaagc  | gttaaaggaa  | aagattgtta | gtgatagttt  | gagggacaaa  |
| 2761 | atagaccagt  | acgagacaga  | attcaaagag  | aaaaccagtg | cagtggaaaa  | taccgtctca  |
| 2821 | actattcaaa  | gtttaagtaa  | ggcaatagat  | tcacttaaac | gtttaaatgg  | tagcataaac  |
| 2881 | aactgcaaaa  | aatataacac  | agatattgat  | cttttgagga | gcaaaataaa  | aactctacga  |
| 2941 | gaagaggtac  | aaaaggaaat  | tgccgaaacg  | gagggcgata | aagtgggtggg | cgaaaatacc  |
| 3001 | actgcggttac | ttttaaaaag  | cttaagagac  | aaaatgggaa | agataaacga  | gaaattgaac  |
| 3061 | gatggtagac  | taaacagttt  | agacactaaa  | aaagaagatc | tgctgaagtt  | ttactcagaa  |
| 3121 | tcgaagtcga  | aaattcattt  | gagcaaagac  | caaaaggggc | cacaagatcc  | gttgaataga  |
| 3181 | attgacgaat  | gggaagacat  | caaaagggaa  | gtagacgaac | taaatgttaa  | ttaccagggtg |
| 3241 | attagcgaaa  | ataaagttac  | gctattttaa  | aataactctg | tcacttatat  | agaggcaatg  |
| 3301 | catagccata  | taaatactgt  | tgctcatgga  | ataacgagca | ataagaatga  | aattttgaag  |
| 3361 | tccgtaaagg  | aagtagaaga  | taaactaac   | ctcgttgaac | agaatgaaga  | ttacaaaaag  |
| 3421 | gttaaaaatc  | cagaaaatga  | gaagcaatta  | gaagccataa | gggatccat   | gagcaagctc  |
| 3481 | aaggaagtga  | tcaacaaaca  | cgtcagcga   | atgacccaac | tggaagagc   | agcaaacact  |
| 3541 | ttaaagagca  | atgccaaggg  | aaaggaaaac  | gaacacgatc | tggaagagct  | aaataagaca  |
| 3601 | aagggacaaa  | tgagggatat  | ttatgaaaag  | ttgaagaaga | tagcggagga  | actaaaggaa  |
| 3661 | ggaacagtaa  | acgaattgaa  | ggatgcaaat  | gaaaaagcaa | acaaagtaga  | attagagttt  |
| 3721 | gagaggaaca  | ttattgggca  | cgttttagaa  | cggattacag | tagaaaagga  | caaagctgga  |
| 3781 | aaggttggtg  | aagaaatgaa  | ttctctcaaa  | actaaaattg | aaaaattgat  | acaggaaaca  |
| 3841 | agtgatgatt  | cacaaaatga  | attagtcaca  | acgagtatta | caaaacattt  | agagaatgca  |
| 3901 | aaggggtatg  | aggatgtaat  | aaaacgaaat  | gaagaagatt | caattcagtt  | gagggagaag  |
| 3961 | gcaaaaagtc  | tgagacatt   | ggatgaaatg  | aaaaaactag | ttcagcaggt  | taacatgaat  |
| 4021 | ttgcaaagtg  | ctatacaagg  | caatgctggt  | ataagcaaag | agctgaatga  | gcttaaaggc  |
| 4081 | gttatcgaat  | tgttgatatac | aacgaattat  | agcagcattt | tagaatatgt  | aaagaaaaat  |
| 4141 | tccagcagat  | ctgtccgttt  | tagtcagcta  | gccaatgggg | aatttcaaaa  | ggctgaaggt  |
| 4201 | gaagagaaaa  | acgcaagtgc  | cagatttgcy  | gagcagagaa | agttaaagga  | acaaattgct  |
| 4261 | aaagatttag  | actacagtga  | catagatgat  | aaggtaaaaa | aaattgaggg  | aatcaaaaaga |
| 4321 | gaaattttaa  | agatgaaaga  | aagtgcacta  | acattttggg | aagagtcaga  | gaagtttaaa  |
| 4381 | caaatgtgct  | cttcacatat  | ggaaaatgct  | aaagagggga | agaaaaaaat  | tgagtattta  |
| 4441 | aaaaataatg  | gggatggagg  | aaaggccaac  | ataacggata | gccaatgga   | ggaggtaggt  |
| 4501 | aactatgtta  | gcaaagctga  | gcacgccttt  | cacacagtag | aagcacaggt  | agacaaaact  |

4561 aaagcctttt acgaatccat cgtagcttat gtaacgaaga tggacaacct gtttaacgaa  
4621 tcgttaatga aagaagtgaa agtgaagtgt gaaaaaaga atgatgaagc ggagcaaata  
4681 ttcggccaaa ttaaaaccgt agatggtaga attaaagcgc gagtgagtga gaatgaaaga  
4741 aaaataagcg aattgaagga aaaagccaaa gttgagaaaa aggaatcctc gcaacttaac  
4801 gatgtttcca cgaagtcggt attacaaata gataattgca gacaacagct tgacagcggt  
4861 ttgtcaaaaa ttggaagggt gaaacaaaat gcacttcaat atttcgttc ggctgataaa  
4921 tcgatgaagt ccgttttgcc tataagcgaa ttgggtgccg aaaaatcgct agacaaagta  
4981 aaagcggcta aggaaagtta tgagaaaaat ttggaaaccg ttcaaaatga aatgagtcgt  
5041 attaagtgtg aagaaggaag tctgaccgac atagacaaaa aaataactga catagaaaat  
5101 gaattgctaa aatgaagaa acaatatgaa gaagggttac tacaaaagat taaggaaaat  
5161 gcgataaga ggaagagtaa tttcgaatta gtaagaagcg aaataaacgc cttgctggat  
5221 ccaagcacgt ctatTTTTat taaattaaaa ttaaaggaat atgacatgac cggcgattta  
5281 aaaaattacg ctgttaaaat gaatgaaatt catggtgaat ttaccaaatc gtacaatttg  
5341 atagaaacc atttgtccaa tgctacagat tattctgtga cgtttgagaa ggcccaaagt  
5401 ttaagggaac tagcagagaa ggaagaagaa catctcagaa gaagagagga ggaagcgatc  
5461 aaactgctga atgatattaa aaaggtggaa tcgttaaaac tgctaaaaga aatgatgaaa  
5521 aaggtgagtg ccgaatatga aggtatgaaa agagaccata cgagtgttag tcagcttgta  
5581 caggatatga agacaattgt tgatgagctg aaaacactga atgatataag cgaatgttcg  
5641 agcgtgctaa acaatgtagt tagtatagtt aaaaagggtta aagagtcgaa acatgtcagc  
5701 tataagagag acgcgaatag catgatgaa agtatggtaa ctctggcaaa ttatttccta  
5761 agcgtgagt ctaaaatttc atcgaatg gatattcaatg cggaaatgaa atccaatttt  
5821 aagacagact tagagttgga gatcttttcg gtaatatcca attcgaatga acttttaaaa  
5881 aaaatagaac aggattcaaa tgatgtaata caaaaggaaa gagaaagtga acagctagct  
5941 aaggatgcca ctgatattta taatgtgata aaactaaaa atgaatttaa cgaaaagttg  
6001 gaagaagcca agaacaaga agaggtcgtt tcggaaaagg taaggaagc attgaagaga  
6061 ctgagtcaag tgaaggaat aagatgccac tttgaaaatt tccataggtt actagacaat  
6121 acagaggagc ttgaaaattt aaaaaaatg gttaccatct accgggataa gaaaagcgaa  
6181 ggcggaaag aatcagggtt gcaagaaatg gagaacgaaa tgaacaccta tagtaactcc  
6241 ataacacagt tagaaggaat agtcgtatca gccggggaat ccaaagaaga cattgaaaaa  
6301 ttggaaagat ccaatgaaga aatgagaaat attagcgaaa agataagcac aatagattcg  
6361 aaggttatcg aatgaactc aactattgat gagttgtaca aattgggaaa aaactgtcag  
6421 gccactgga tttccctgat cagttatact gcgaatatga aaacgtccaa aaagttaata  
6481 atgattaata aagaaaagga gaacacggaa aagtgtgtag actacattaa agacaattcg  
6541 tcctccacag acggttatgt cgaaacgttg aaagggtttt acggtagtaa gcttacattt  
6601 agcagcgc atcgaattgt gcaaaatgca gacacatatt ccgtgaattt tgcgaaacac  
6661 gaaaaggagt ctttaaatgc gataagggat ataaaaaagg aattatattt attccaccaa  
6721 aatagcgata ttagcattgt agagggaggc gtccaaaatg tgctggcact ttatgataag  
6781 ctgaacgagg aaaaaagaga aatggatgaa ctgtacagaa atataagtga aactaagctg  
6841 aagcaaatgg aacacagcac tgacgtgttt aagcccttga tagaattaca caaaggattg  
6901 attgaaacga ataataagtc tttgctggag aaagaaanga acttaaaaag cgtgaacgac  
6961 aatatgcaca gtatggaagc tgagatgatt aaaaatggcc ttaaatacac cccagaaagt  
7021 gtgcaaaaata ttaacaacat atacagcgtt attgaagctg aggtgaaaac gctggaagaa  
7081 attgaccgtg attatggcga taattaccaa atcgtggaag agcacaagaa gcaattttcc  
7141 attttaatcg acagaacgaa cgcgctaatt gatgacattg aaatttttaa aaaggaaaac  
7201 aattacaatt taatggaagt aaacacagaa accatacaca gagtaaacga ttatatagaa  
7261 aagatcacca ataagttagt acaagccaaa acggagtatg aacagatcct ggaaaatata  
7321 aaacaaaacg atgatatgct acagaatatt tttctcaaaa aagtaagtat tatcgaatac  
7381 tttgaaaacg taaagaagaa aaaagaatct atattgaacg atttatatga acaggaaagg  
7441 ctgctcaaaa taggggaaca cttagatgag attaagcgta acgtgacaga gacatgagt  
7501 agttatgaaa ttgatcaaaa aatggaaatg atgtctaaaa accttctaga gaaaaaatc  
7561 aaaatgatga attacacttc catttatgag ttggagagag aagcgaacga aataaacagg  
7621 gatgctaaac aaataaaaga tgatgataca atacttaata gtgttttaga agctgccatt  
7681 cagaagaggg gagatatgga cgcgatcttc agtcagatgt ctgcagatag aaatccaaat  
7741 gaatataaat ctgcagagaa gtacatgaat gaagcgaatg aaataattcg ccaattagaa  
7801 gtaaagcttc gagaaatagg ccaactagta caggatagtg aaagcatatt atcagaaatg

7861 aattctaaaa agagcgctat agaaaaggaa aagacagcta gggctttgag aactagttaa  
7921 aataatagaa gagaagagga agaaagggca cgtgtgcaag aaatgagcat gaataatgat  
7981 cccacgcaaa gtgaaacaac tcattcggag ggatccatcg gtgaaggaaa agaatacagac  
8041 tcggatgaaa caggtttaac acacgatgca ggtgcagatg aagattctac tagctcggca  
8101 aaaggggcac atgaattaga agaggaggaa actacagcac ctatggaaga aaccgagatg  
8161 aatgacaata cccttctaggtatgtacact accagaagtgt atgaacctga tatgcataca  
8221 gagaacaccc aggatggtac ctatcaggat acgtcaaatt ccagcagatga agcagatatt  
8281 ttgaacggca agttcaatgtc taataatgtc aaatatgcag gagcattcgt tttactgtgt  
8341 acgagcgcag ttataggggc tattatagca cataagaaag atgaccaaga ggagcttaat  
8401 aatggcgtgg aagacgatag ggtgtttgaa gttaaaaaga gcatgaaccc agaaaacaaa  
8461 gaagaaatca ttgatgtttc ttttgttgat attgagtatt aa

//

LOCUS Pvrbp1b 8619 bp mRNA linear INV 09-NOV-2015  
DEFINITION Reticulocyte binding protein 1b cDNA, full length CDS.

ACCESSION Pvrbp1b

VERSION

KEYWORDS .

SOURCE Plasmodium vivax (malaria parasite P. vivax)

ORGANISM Plasmodium vivax

Eukaryota; Alveolata; Apicomplexa; Aconoidasida; Haemosporida;  
Plasmodiidae; Plasmodium; Plasmodium (Plasmodium).

COMMENT

FEATURES Location/Qualifiers

source 1..8619  
/organism="Plasmodium vivax"  
/mol\_type="mRNA"  
/db\_xref="taxon:5855"  
misc\_feature 1..8619  
/note="isolate VTTY57"

BASE COUNT 3629 a 1146 c 1840 g 2004 t

ORIGIN

```
1 atgaagaagc caatztatag gacagccctc tttggctctat ggcttgcac tcttgattta
61 aatcgaggga aaaacacggt gcataatata aagaacatt ttgaagactc gaaattttta
121 tcattcgatc cgaatgtgaa gagaaacaaa agttcaagc ataaggacgt gaaaaagaag
181 agctttaaaa gtctggaac agatagtgtg cagcagtttg ataaagaaat tagcaaagtt
241 aatagggagg acccaacagg aataatcgaa tctgatagtg cttcatttat aagcttagga
301 aatgctagtc tgaaaaatga accctctgac ggtggggag atgaagtggg ttaagaacc
361 gacggagggg gtagtgacac cgataatgat tcaggcaaat tggagaaaag tgaataacct
421 gatgtggaga acgcagaatc ggtatcgaaa tataaaatcg ttttagaaga ttatgtaaat
481 aaactgaaag aatctaattc atatctcttg atggagggtg attatgttaa tctgcagtct
541 tttaaagaaa ttaggaacct cattccagag gggaaagaat accacaagtt ctacgatgag
601 gagatggata aaaaagtcac agattacaca aatagattag acgcactgat gaaaagttc
661 attggagcga aaaatgaaat gataaaaatg gatgctatcg taaaaattca taaaagggt
721 tctaccgaat tgaagcaaga agctgaaaat gtaaaaaaat tagaattagc aaaggagcaa
781 tatgaaaagt acatgaaaga gtataatgat gatataaaac ctattgtaca tgaattaga
841 aacaaggcat atgagcattt gaagcaatcc agctgcacgc accagtgtaa tgcttacatt
901 atgaattatg ctctgtcttct taacaaatat ataaagaaca tttcagagac tacggacgag
961 tcagttgtca ctatcgtaa agtattaac gattataatt ctctggacaa aatattagaa
1021 cttgcagaaa gggagaatat agacattgca gaaaatgtct accttttgaa gttactagga
1081 gaagaagtaa atgaccttaa ctatgtgtat gtgataaaca gatcgctaat aatgacgcg
1141 aataaagttc tgatggacat aaaggaaaat gggattttat ttcatacгаа ggaggataaa
1201 attgtaaaaca gtacaaagga actaatcaac aactattgtg tgtttcacca tataatgatt
1261 ttgaatgttc caattaaaaa aatgtacgaa gaaaggataa aaaggtctaa cgatttattt
1321 tctacaatta tggaaaagtt aaaagatgaa gtcataaat taatcaattc tgtatttgtc
1381 gaggaggaaa gtaataaaat tcttaagtcg tcagaaggaa ttgtccaaaa tgcagaaaaa
1441 atacttgagg aaaataaaaa aaaaatagac ttttttaaaa ggtatccaga aataaaaacg
1501 aagcctccta tggagaatt acaactgag tttagtcaac aagaagaagc gaggggggaa
1561 atattaaaca tggcacagct aatcgatcac ttatataata atttgtttca tgtgaacaaa
1621 actaatcatt taaataaatt aaacgaaata gctcagtacg gggatagcat acaaaggga
1681 aatttactgt tggagaat ttctgaaat aataaagagc ggaatgttct aaaggtaaat
1741 attgtactt tgaaaaatgt gcatgggaat ttggtagctt cgaaaaataa cattgttgaa
1801 attgtaataa atgtggacaa cacttctgag ttggacgaat tgaaggaaaa ggaagagaag
1861 cttgcaaagt acatggaaga aattaacgaa aaaattaaag acatgataaa gaaaatgcac
1921 aaattaaag aagtcatcgt tttaagagat aaagcgaatc aagatgtcat cacgattaac
1981 gagttactga atggagggtc gaatgccaat ttggaagaat tcataagtaa aaagaacaaa
2041 gccaatgatg atattaattc gatattttaa acattgtaca gcgagacgt atatgatctt
2101 atcgaaacgg tgggcacggt tgttcgtgaa aagagaaaaa ttgtaggcga aacgttttcc
```



2161 gctaaacaaa ttgaccaagt ggaacaatat ctcagcgaag taagagtggc tcatgccaat  
2221 ttagacaccc tgactcatga aaaattgata aatgcctatg atcagttaag cgcagaagag  
2281 aacaatacag aaaaacttaa aaatgatctt gttaagaaga agagcgaaga tctatacaaa  
2341 aaaatggcag actctttgaa aacattttaa actgaatatg ctgatttggg gagaaatatg  
2401 gaggaatacag aaaggaaga aaaaatatta gaacagtgtg tgggaaaaac tttgaaaaag  
2461 gaggaagaac acttcaacac gttacaagtg gatggagaag ctctgaaaga cacgtacaat  
2521 tgcgcaggat tcgaaaaact gaggggcact ttttcgcaga ggaaattcga attgtcacia  
2581 aaaatagacc acgttaaggg tgtggtgact aatatggaga aacttttaa atcttacagt  
2641 gctttggaga agcattttct tttacttgat gatagcgatt acgtaaaacg agtggaaca  
2701 ttaagacaaa ctgttcagcg cgaaatgatg aataaaaaaa tgagtgttca agaggacagc  
2761 ttcaagagaa ggactgaatc tgtacttaag accatcaaaa tattcgaaag tttaaacaaa  
2821 accatacatt ttcataacca cttaaacagg agcataaacg aatgtgaagg catcaatgta  
2881 tcgatcaaca gtttaaaagg caaaacagtc gcgttaaagg gcgaactgca aaaagaaatt  
2941 gatgacattg gagcagacca gctgataagt gaagctgtaa aagtggcact actagataag  
3001 ttgaaagcag aactaggaag tgtaaacagc aaattagatg aaactcacat ggatgatttg  
3061 ctcaaaaaat caacagattt gaataaattc tacagagatt caaaaagcga tttgcacgaa  
3121 aagaggcaag aataccctgt gcactattct ctagaaaagg taaatgactg ggaagaaatt  
3181 aaaacggaag tccacgaatt aaatgctcat tataatgcat tcaacgacaa taaggctaaa  
3241 ctaattttag ccaattcgcg catgtacttg gaatcaatat ataacttat aaagagttg  
3301 gttcataaca caagggagga gaaagacaaa atggagagat ctctaaaggg aatagaaaa  
3361 agcgtagaaa ctatcgaact gaaccaggat tataaaaaacg ctaaagttac ggacaattgag  
3421 aatgaaataa aaaatataaa tgaagacact attccaaaaa ttaaggaacg aattgatgag  
3481 tgtagcagaa aactgactaa attcgaggaa caatcggata gtttaaacia caaagacacg  
3541 aataaaggaa gtgacgttac tctcttgctt gatgtgataa gacaaatgaa aggtacttat  
3601 caagaattaa aaaagatacc tactgagatg ttcaaagaga gggacgaaat aaggaacact  
3661 gaagaaaatg taaacaaggt tcaattcgca tacgagagaa aattaattga gcaattttta  
3721 aaaagaatta ctcagaagag gaatgaggcg gaagagcaaa cacaacagat cagcgcatt  
3781 gttaaacaaa ttgaagggat aagaaaagaa acgggagatc ctatcgacia agaattaacc  
3841 accacgaact gcgaaaaaca tcttcacgat gctgaagaaa aaggggagga aataaagcaa  
3901 attgaagagt tgtccaccaa actgagagga gaagctgcca ctactgatgt cataagtga  
3961 gtcataaaaa ttaaagaaca ggtttacgca catttggaia aagccacaag caatagtaac  
4021 cacgtaagcg aggcactgaa cacaattaaa gaaatgaaag aactaatact gtcagagagt  
4081 tataacagtg ttattaactt tatcttaagg aatgtaaatt atgctcataa atatgtcgaa  
4141 ttggtaaaaa tggatttgct aaaaattgaa gatgccactg accatgtgaa gatacgattt  
4201 gaggaagcaa agaagttaaa ggaaaaaatc aagacagatg tggatgacga gggggcagat  
4261 catatcatca aagaaattga agaaataaga aaagtaattt tgaatgaaat aaaagacaca  
4321 agcacatttt taacaaatgc agaaaagggc aaagaaaatt gtcttctaca tttcgagaat  
4381 gcaaaggggg gaaaagcaaa atttgattac ttaaaagaac atggtgacgg tgagcacia  
4441 agaatatcac acagtgagat aaatatggtg gaagaaaata tgacaaaagt gaaacaacac  
4501 acggatgaag ctgacaagga tgtggaacia acgaaaaaat tttattactc tttttgggg  
4561 tatgaaaaac taatcaatga tctgctaaac gaatcgctac ttagaaaagt caaattaaaa  
4621 tgcgagaaat tgagaacaga agtagacgga ataatggacg aaatggaacg tgtagatggt  
4681 aaggccaagg aagagtccat cgaacaagaa caaaaggtaa aacaaatgaa ggagcaatcc  
4741 attggtgagg gtgatcagcc taaagaactt aacgaagagt ctatgaacgc attgtctaaa  
4801 ataaaaaatt acagacagaa attggacgac gttatgttaa gtataaaaag tgtggaagag  
4861 aatatggagc agtttttaag gaatgctggc agttacgtga aaacaacgct agacatctct  
4921 caactgcgaa atgaaaattc gttcgataat ttgacagcgg cggaggaaaa ctacaaaata  
4981 gcattgagaa atgttcagaa tgaaaaacag cgtatgataa gtgaggaaaa aaggctagct  
5041 gaaatgtata gggatatcat tagttagga aagaattgg aagaacaaa aaaaagatac  
5101 gaagtgggat tattgaaagg gataaaagag aatgctgaca gaagattgac cgcattggaa  
5161 ttaacaaaaa aggaagttaa ctctttggtg gatccgtcca aatccatatt ttttaattc  
5221 aaattggaca acttagacga aacagatata atgaaatata tatatcgcta tgctgatcga  
5281 atttaccata tttttgacga atttgtgaaa ttgtacaaaa tgatagaagg atatttatcc  
5341 cagaattcgg acccctctgt aacatttaat gaagtcaaaa tggtagggga gaaagcga  
5401 atggaagaaa tgagccttgg agaaaaggaa gaagagtcaa aagaagtact gagagacatg

5461 aaaaaaaagg agtccataag gttgttaaac gaaatgatgg aatgctgaa cagtgcaaag  
5521 gaaagagtta cggaagatca tgcaaaagtc agcaactatg tggagaatgt taaaaaagac  
5581 gtcaccgatt taaaggtact ggacgatgta aataacggcg ccaatgtttt taataaggca  
5641 atgaatagtg ttaacgaaat taaagacgca aagtatatga accataggaa ggaagcggaa  
5701 aatatatacg aaaatatgat acaactggcg aactatcttct tagatgacga tgttaggatg  
5761 gagtccacgg gaaagttaag cgaagcggca tttgcaaagg cagaaccggg tatagtgtca  
5821 gacatTTTTG gcaaaataaa ggagggcgaag gaaattgtag aaaaaataga agaagagtca  
5881 ataggtatac aaaataaaca aatagaaggg gaaaggctct cactgaggc gaaccacatt  
5941 tacagcgtgg caaagctgaa aatgaattt aaaaacaaaa agaatgaagc gaaacttaag  
6001 gtcataattcg tgctagccga aatagaggaa gcattacata aattaaaaag tgtgaataaa  
6061 gtaaaatgcc attatgataa ttatgataat tataatgata tactagaaaa taacgaagaa  
6121 catgagaatt tcaagcaaat ttcttctacc tacaagttga agaaggccca aatagcggaa  
6181 gaagcagata taaatgaaat gaaaaatgat gcaaatatgt acaaagacaa gtttagccagt  
6241 ttggataaaa acggggagac ttttaacgat ggaagcgatg aaatttctac tgcacagaag  
6301 tacaaaactg acgttgaagg tattatagac aaactaaacg ttatagatga aaccattaat  
6361 ggaattaatt ccacgctaga cgaattgcta gagttaggaa ataattgtca gctgcatcgg  
6421 acctTTTTaa tcagcagttc tttgaataat aaaattgcaa aattcttagt agagattagg  
6481 gaacaaaaag agaacacaaa aaaatgcttc caatatgtaa aaagaaatca ccaacatttg  
6541 gctaatttcg tttctgagtt acacaaaact cagggtggca tatttgagaa gtttaacctg  
6601 gtggataaca caccggatgc agataagtat taccatgaat ttatggaaat agagcaggag  
6661 gcaacgaaaa tcgtgaagga tataaaaaag gaaatatacc acttaaacga tgatgtagac  
6721 gaacctgttt tggagaaacg gataaaagac gtgatcaaca cgtataacaa attgaagacg  
6781 aaaaaggTCC aatggacca gagttataaa aatatgtata tcaactaaatt gaggggaagtc  
6841 gaggggaagcc acgatctttt caaccaggta gcacaattga ttagaggcga aacggataaa  
6901 aaagggaaaag ccctgtcaga gagagaaaat aacttacaca gtatttacia ttttgtaaaa  
6961 ttgcacgaaa ctgagctgca taatctttac gccaaataca caccggagta tatggaaaaa  
7021 ataaataaaa tattcgacga catcaatgct aggatgattg cggttgacct taatgatgat  
7081 cacagcagtg aatatagcga cgtgaaaagg catgaacacg aggccatgct tttaatggac  
7141 gcaacaaata atttgtcgaa ggaaagtagaa atgatgcaga acgaaagtgg cggcaaaaac  
7201 gatggcataa atggaggaaa aagccaactc gtggaagatt acacaaatac gatgagcga  
7261 ttcacggagc aggctaagac agttgcgaaa aagatacacg actcaaaagg ggactacgca  
7321 aatatgtttg atcatataag ggagaatgaa gccatgctgg aaagaattga cctgaagaag  
7381 aaggacatta aagaaatact tgcgcattta aacagaatga aggaatattt attaaaaaaa  
7441 ttatctgaag aggagaaatt acatcatatg agagaaaaat tagaagaagt taacacgagt  
7501 actgacgaaa ttgtaaaaaa attcaggaca tatgatcaaa tggtagatat atcccaaat  
7561 attgacatca aaaatgtgca gtcaaaaagg tacgactctg tcgatgagat agataaagaa  
7621 atgagttaca taaaaactca caacaaagat ttaatagaca gcaaatttat agtggaagg  
7681 gactagaaaa atgacaaaag gaaaaagagc gaaatggctc aaatattttc tacaatttcg  
7741 agagataaact cgagtatgta cgaatatgca aaaagctttt ttgatagcgt ccttaaagaa  
7801 attgaaaaaac taactcaaat gattagaaat atggataaat tgataaacga aatgaagcc  
7861 gtaatggaaa aattgaaaga tcaacgaagg gagttacaaa atgtagagaa tgcttctacc  
7921 gatttgggaa aattagaaga agtagacaaa atggcacaaa ccaaatcggg aacagagcta  
7981 tcagaaaagaa acgatagtag gaatgcaaag gatggtgcaa cttattctac acttatggat  
8041 gataaagaaa cagatagcgt gaacggagaa gagacgaaac aagaaaatgt tgtggtgaa  
8101 aagggactac cccctcaaac agacatttac acaagtggag ttttaaaaaa tgacagaaac  
8161 gatcaaaaat cagaaaaaat tggtgagaaa aagtcaaaca aaccagtagg caccgaggag  
8221 aatatacaac acagcagtta tttaaacaat gataatagta acaacgatat tgacgtaggc  
8281 accttgata cgctaggtgg atataacgct ccaaatgata attataacac taatgaatct  
8341 ggggatgata taaatgaaga agcgaaaaaa aagagaaatg ctgttttatt cgtctatgta  
8401 gggggactgt ttagtgctct tttcatttgt attggtgctg tcttctattt gttacataga  
8461 aaaattggca tagagggggg cggaaaaagc gatcacgaaa aaaaaccaac cattgaggac  
8521 accaaaattg aggtatttga agaacatat ggtttaaaac gtaatgtaaa agatgagggt  
8581 attgatgtac ctttgtcga tatggaagat aatttgtaa

//

LOCUS Pvrpb2a 7464 bp mRNA linear INV 09-NOV-2015  
 DEFINITION Reticulocyte binding protein 2a cDNA, full length CDS.  
 ACCESSION Pvrpb2a

VERSION  
 KEYWORDS .

SOURCE Plasmodium vivax (malaria parasite P. vivax)  
 ORGANISM Plasmodium vivax  
 Eukaryota; Alveolata; Apicomplexa; Aconoidasida; Haemosporida;  
 Plasmodiidae; Plasmodium; Plasmodium (Plasmodium).

COMMENT

FEATURES Location/Qualifiers  
 source 1..7464  
 /organism="Plasmodium vivax"  
 /mol\_type="mRNA"  
 /db\_xref="taxon:5855"  
 misc\_feature 1..7464  
 /note="isolate VKBT95"

BASE COUNT 3322 a 1180 c 1255 g 1704 t 3 others

ORIGIN

```

1 atggaaaata aggtgctctg ggcagttttt tacaatctag tgctgttctt tctggcatca
61 agcaaagaaa gcaatcgaat taaagcatat aaacttaaga aggaacctaa gctatggcca
121 ctacaagata gccttaacga aagcgataaa ttcgagtata ccaatggagg gaaggaaaat
181 cccccaatt tcttcagctc aaatgtaaag gcgcataata aaaaagaggg caaaaagtat
241 gaacaaaatt tgtctttacc tgacaacaca tctttcgtaa cggtaaaaaa ttataactac
301 acaagaacac catcacacca tgcttacata agaagagaca atacacacac caacagtaca
361 aataataatc aaattaggaa tgtacctaaa gaattaaatc ctcgggaatt tctcttcaca
421 ccaaagaatc aaataagcgc atctctcatc caactaacg gaccgggtggc tccaatggat
481 atactacggt acctagattt ctcaaacagt tcaggacaaa ttatttctac agtgtatccg
541 ttctatgttc agatgagtta ttttgctgaa attaaatatt acataacata tcattacgag
601 gcgaaaaaaa attatgatga agcatataat caaagcgtaa atccacttat gtcaagtata
661 caaaatcaaa taaattcttg tgtaccgaaa aaagcagcat tggaaaaaac aatattcgta
721 ttagaatacc cagagaatca caatataaac ctaagcaatt acgaagcaaa gcataatgag
781 tacaagcagc aattagatgc atacaaaaac tgtgtacagg caaatatgaa atcatacaca
841 gataggatgt caaaatttaa tgaaaaaatc tattcaattt taaacagtgt gaaatgcaca
901 gatgcatgtg aaactgatac gtacgaaatt atgcttgaaa tatatgtaga aagagtaaag
961 gaagttaatc ataataatta tgtcaattat ttgagtactt tgaaagcatc tctccaattg
1021 ggggttacc tgatgctcaa agtaaaacaa gaaatagaca ataatgtcac cattagtgca
1081 ataaattttt tacaagaaga aatggttagat atcatcacia taggtgaagc tcacacaggt
1141 aaaattatac atggtaagga aaacgtacta aaacttcaaa ataataatat tccaccacia
1201 gtccctttta gtactcttaa aaaattatat tttgattccg ccaatttcta tgccacttat
1261 aagtttagct taaaaagagc cgataccacg acagctgcgc taaaggaaaa aggaaaatta
1321 cttgctaacc tttataataa attgataaca tatgtaagcg aaaaaataga taaaaatttg
1381 gattctttat acttcatttc aaaaagttaa tcaatgattt ccgaatttga agataccttt
1441 aaagcgggaa cagaagcaag caaagaaaac tccagcataa cagcagatta cgcacgctat
1501 tcaaatttgc aaattataga tatcaaatca aagtacgatt acaaaaatac cgagttaaag
1561 aaataacttaa atcaattaaa ggtactcatt tctcctatga aagatttata taatctaat
1621 tctctacaaa aagaccaaaag ggacagtgta agaagtatac gctcatctga tagtagtcca
1681 caagaaaagg ttagcgcact tttaaacttc ttatcaaaaa taaaggaaga gaattggcacc
1741 gtggttgaga attttaaaaa tatagaaaga tattatgaac aaggcaagcc attaaaaggt
1801 acactcgagg gattaataaa aatgatcaaa acctacgaac aagatagatg aaatttaatt
1861 gataacgaaa agcacaacag atcgtacaaa gatgacataa aaaacaaaat aatatatata
1921 accgaaaaaa cagatgctat aaaagacatt atccccttaa atgaggaagt agacaatatc
1981 atcaaacaaa ttgagaaact attcaatgaa gacctattcc atgaaggatt accaaatatg
2041 gaaaaactta aaaaagagaa agaaaaaata aaagctacta taaaatcgct caacactaat
2101 ttctacgacg gagacttaaa agaattagtc gacgatatgt taaattttgt ctacaaacac

```

2161 agcgatttct acgatcaagc atacgctaaa ggagatggtt taaatctaca aaaggaagca  
2221 gaacaagaat atgaaaaaat tacaaaacta aaatcgaata acattcctca aatgttaaaa  
2281 gatttgaaat cagaatcgaa aaatctttca gagcttaaag acaccatgat ggatgaaatg  
2341 ttgaacaatg ttcatacaaga catatcaaac gttttcgaac agataaggaa caaatataaa  
2401 gacataacaa cctcgcctcag tgcctacaaa gaggacaaac agaaattcga gaaatttaaa  
2461 gtcgatatga tacagacgaa aaacgaactc ctggggagtc ttcaacaaaa tgataaaaaa  
2521 ctctcagaag caaataatat gtatgaagaa ttcttggcgc acatagatac tactaccaat  
2581 agagaaaagc aatgtataaa ccaagccaac gcgttaaagg aaaatttagc aatgttcaa  
2641 agtaaaatat catcgtacca gggaaaaata gaaaaattga aagcgcatac taggaaaaat  
2701 tatgaaaaaa ttaagacatt actgcaaact tttggcaatg aaaatataaa cgaaaaactg  
2761 gcagaatacg aaaaagaatt taatgaaaat aagnaagtag tgaataccat cataaaccaa  
2821 attcaagaat caaacaaaaa tatagagaat attaaaaat taaataattc tatcgaccgt  
2881 tctgaagtga acaaacagct gatagaagaa ttggccacca ataagcaaca attaaaggaa  
2941 aaaatagata gtcacattaa gcaactaaac agttacaata tcattgcaaa agatgataag  
3001 ctaatttttg agaaaacggt aaatgaggag aaggcaaata ttaacacgca actaagcgac  
3061 acgtcaatag ataattttaaa agcacaaaata caagaaacgc tagattatta caaacagca  
3121 aaggcaaaaa cgaatgataa agatggaacc catttagaaa aattagataa aaaaaaatg  
3181 gattggaaaag acagcaaagt taaaatagat naattaagcc ccagctatca agtgctagat  
3241 aaaaaaatta atgatttgat taaaagcaa cccgacgaaa ttgtagctct cattgataaa  
3301 cttataacag aaaagggcaa tgaaataagg gagaaaaacc cgaaaaaat aagcacctt  
3361 agcgaataaa aaacaaaatt gtcctctttc actgtctccg ataatgttaa gaatacccaa  
3421 aatggtgcaa taaaagggga aataagtgga ttcgaaaaaa aatggaagc cctattaaga  
3481 agaatagaca ataataacgc aaaattaact gaactgagag ggaaggcaga ccaacatgta  
3541 accaccctac gtggggaaaa aaataaaaca gctgaattca atgcgaaaaa agatagcctg  
3601 gaaaaaatac accaacaat gggaaaatag cataaagaat tggagagcat ggaaaatgaa  
3661 aaaattccca taaacgacat taaccaaatg gaaatagaat atgcacgaat ttttaattcat  
3721 catatggttc acaaaattgg tgaaaaaaag gaaaggtcta aatcatctt agaagagatt  
3781 aaaacaacta tagcaagcat cgatcaagca aagaaaaata tacctcctga gcaacaagat  
3841 atccttcgcy aattcgagta tagcggatat cgcgacaaag ctactgccag tagtaccgaa  
3901 atagaacaaa ttgataaaaag tgcaaaagca gaggagggtg aagccaacag tagcaccaac  
3961 ttaagcgaca ttgatgtgat taaaaaacag gtactgtcct acttcagaaa agccaccact  
4021 gaaagtaaca ccatggaaaa tgcgttaaga gaaattaaaa atgtgaacac tttcttaaca  
4081 tcaaacatth cagaagaat tttagctaac atactaaaga gtgcagcgag gacccaagaa  
4141 ttaaatacaac aagcggtagg cgaatttaac aaaacagatc gtctaattaa agaagtagaa  
4201 gcgaagctat cccaggcaaa cgaacataaa tcagcaatth caggaagtgt agaatacaaa  
4261 caaatcgaac agaaaataaa cctaattaaa caaatcaga aagaaattac ggcggggaaa  
4321 gaagaaataa acaactgttt aagtaatacc aaagaatata aagaaaaatg cgagtctgaa  
4381 gtgaattcag taaatagagg aaaagctaaa gtagatthtc tgcaaaaaag ggaagcgcta  
4441 gaaaaaaaaa tgagtcaaga aaatthgggt aaaattacag atagcattga tcaatgcaaa  
4501 aaagatttag cagacattac tagthtagaa gtaaaggtht aagctaatth cgaattcaatc  
4561 attaagtatg aagaatccat taataccatt thaaattatt cctccattht agaatacaaa  
4621 accaaattgg aaatacgc aaagaaaaaa acagacctca tgacttatat taacacagaa  
4681 aattctgcca ttcaggagaa gctgctaaac ttgcaaaaaa aattgaacca attgaaatgaa  
4741 aacacggact atactaaagt gggaaacgat ctcaacaacg caaagtctac aaaagcaaat  
4801 gtaattatcc agtataactt aggacgagtc aaacatcaac tggaaaatgt aagtgtcatc  
4861 aacacggagc tagaaaaagt cctaagtgca gctaccgatt tagagaggga catctcaaaa  
4921 atagccgagc tcacagaatc taataacttg gagagcctaa atgggaagga agcagattac  
4981 acgaaacgta taagaagtht taacaaattg aagcagctcg tgcaagagaa agcagcaaaa  
5041 gtagaagaaa thtctcctga tacggataac atagaaaaag aactgacaga acataaaaa  
5101 atthttgaag tggacttac cgaaggtht atcgaaatag thaaaaatag aaaaatac  
5161 gtatgacaaa caaaggaatt gctaaattca tcattaaaca atthtgctc cctctthaat  
5221 ggattggact taaaaggata caatccaaaa gcaaacctag aatgtacac acaaaaactg  
5281 aacacaatac ataacgaatt tatggcatct cacaaaatat ttgatgaaaa atcaagaag  
5341 gtcttagaca aagatgtgaa cttcacggaa gctaaaacac tcaggaggga ggcgcaaaaa  
5401 gaagatgtht ctcttaaaaa taaagaggaa gaagcaaaat cgtacttgag tgatatcaaa

5461 aaaaaagaat ctttcgaatt tatacttcac atgaaggaaa aattaaacca aattagtaaa  
5521 atgtgtgaac agcaatatga acaagctgat aaaggctata gtgaagtcaa aacaagcatt  
5581 gatcgcattg caaatTTAAA tgatgaaaat agtatagcgg atgtactcaa agaagcaaac  
5641 gataaaaatg agcaagtaca aaatctgaca cattatacat ataaaaatga agcacaaaat  
5701 gtgctaaggc atatggcaaa gtcggcaaat tttataggca ttaacctagt aacaggaata  
5761 caaccgacgg aattatcatc acaagcaagc gaatcgacaa cgccagagtt aaaatttgaa  
5821 tcagaagggg aatgaaatt ggaaattcta acattatcag gaaatactac aaaattggac  
5881 tattataaaa atatgaaaga cgcctaccag agcgtccttt ccatatttaa atactctcat  
5941 ggtatagacg aaaaacaaag agaaagccaa aaaataaccg aaagtgcaaa tggctcatat  
6001 cttataataa aggaaataaa tgaattcaaa ggaagactga acaatgtgaa gagtaaacaa  
6061 acagccattt caaacaaaat tgataacgct actacgctgc tgcacaattt gaacaaaatt  
6121 aaaacggatg ataagaatta cgacacaatt ttagaaaaag acgcttctga agaattgaag  
6181 aggcgacgtg attcatttaa tcaagaaata aaaaacaccg tcgatggctt aaaattgaag  
6241 gaaatccaag aaaagtttaa tgagcaagta aaactcctac aaaatttaga aacaaaagtg  
6301 agcacactaa atgtgcatga gggaaacgct accgaaactg tgaaaaaaga aaactactgc  
6361 gttgatgcaa ttcaagccgc aatggaaggc atagaaaaag atgtcgaata tatcaactac  
6421 tcatatgatg aactattaaa gaaaggacaa aaaattgaaa atcagagata cacatccata  
6481 agggaaaacc tcaccaataa aatagcgaat gactcctcag caatcaacaa aataaagaaa  
6541 aaagctcaag agtatttagc atacattaag aataactaca actctattta taatgatact  
6601 ggcactttta atgaatactt cgacaccaa cggttaagta accacgattt aacaaatggt  
6661 caggaagcga ccagattaca cattgaaatg tccgcagccg ttgaagcatc agaagagata  
6721 attgcagata tgaaaaatga attcataacg aacacagaag cggatataag cgctttacaa  
6781 aatagcgcag acagattaan gtcgctttat agtaatctaa aacgcaaaca aattagtata  
6841 aaccaaattt aaaaaaagat taacttaatt aagttgcaag aaattaaaac aagcgctaac  
6901 aatatatgg acatagccaa actgtttaac aatgtgctag aggcccaaca taaagaattg  
6961 gcacaagata taagtaaaat attgcaagct aaggaaaact cattaatat gcagcaactg  
7021 ttagaatctc acattgataa acttcgagcc ttgataacca atattgataa agaactgata  
7081 gaattaacaa atggtaaaa taaagcatca aatcgacgta ttagtcaaat ttccccaatg  
7141 gggcaaggca aattgttcag caccacagaa ggacaagctt ataataattt acacaacaca  
7201 ggatataacc attatggaag tggaaacat tcaagaggaa gaaatgaaaa tggaaatgtc  
7261 cgttttgtag cagggattgt tgtgggattt ggtgtttgtt ccttttttgc ttcggcattg  
7321 tttaaaggca aaggggaaaa cgaaacatat ggaagagatc taaattcacg tgatgaagaa  
7381 tttgaagcca aaaacaatgg aaatcttcaa gataaggaag aaattattga agtgtccttt  
7441 cacgaaagtg aaaatgcgta ttaa

//

LOCUS Pvrpb2b 8421 bp mRNA linear INV 09-NOV-2015  
DEFINITION Reticulocyte binding protein 2b cDNA, full length CDS.  
ACCESSION Pvrpb2b

VERSION  
KEYWORDS .

SOURCE Plasmodium vivax (malaria parasite P. vivax)  
ORGANISM Plasmodium vivax  
Eukaryota; Alveolata; Apicomplexa; Aconoidasida; Haemosporida;  
Plasmodiidae; Plasmodium; Plasmodium (Plasmodium).

COMMENT

FEATURES Location/Qualifiers  
source 1..8421  
/organism="Plasmodium vivax"  
/mol\_type="mRNA"  
/db\_xref="taxon:5855"  
misc\_feature 1..8421  
/note="isolate VTTY57"

BASE COUNT 3774 a 1288 c 1438 g 1921 t

ORIGIN

```
1 atggaataa acgcgctttg gacgattttg tgcaatcttc tatttgcct tttagcgtca
61 agtagagatg tcaacaggag taaaccgaac agatttaaaa aggaactcac gttatcaccc
121 atatatcaaa atttaattcg aagcagtcaa gtacaacatg ataaaaacta tgaagttgat
181 gatggcaaaa ttaacgatgg aggtgacgaa aaagcgcatt cccctgatag ctcattctcg
241 ggggattcag aaaggtatag cgctaaagga aaaccatcgt actattctta cataaaaaaga
301 ggggacatat atacacacag ttcaaacaca aataaaagct taaatgatag taacaagttg
361 aataggaata cgattccaaa cgaatttatt caaactagta ataagaaaaa acctgagaag
421 aaaactacca aaagtgaacc agctccaaaa aacgggtcaaa cgtctccttc accaaaagag
481 ccttcccccg aatctacaca aattaccaat acaactgata acatagacta cttcgacatt
541 tcagatgaga gcaattacta tttaatttcc cagttaagac cacatttttc taatatatac
601 tttttcgatg aattttaaagc ttacgcatca tatcacacag aaatcaaacg ttatgaggac
661 atacataaga aaaaagttaa ttcccttttg aacgaagcat ccagagcaat cggcatttgt
721 aacagggcaa aaaatacagt gaaggggtta ataaatattt tagagaatcc ccaaagttt
781 aaaacgcaaa gagaatcata tgatgtaaaa ctctcgccaa atgaagaaaa aaaggaagca
841 ttttaggggat gcttactaaa taaaaatcgg aagaatttgg atcaataaaa aaaaataaat
901 aacgaaattc gtgatctgct agaacaactg aaatgctcac agtactgtca aactaatgta
961 tattttgaca tgattaaaat atacttggtg gatttttaaaa aaatgcctta cgaaaattat
1021 gacactttta taaaacagta taaaatttct tacctttctg gtgttgatat gataaggaaa
1081 attgaaaaac aatagacaa cccagttacc ataaatgcca taaaattcac tcaaaggag
1141 atgggataca ttatagacag atttgaatat cacctgcaaa aagtgaaca ttccattgat
1201 caagtgacag cattgtccga cgggggttaa ccaaacagg tcaactaaaa tcgtcttaaa
1261 gagtactact ttaatatagg taactactac tccattttta aattcggcaa agatagtctc
1321 aatatgttga ataaagcatt aatacataaa gaaaaaatag tccacaactt acttggtgaa
1381 ttatttggcc atttagaaga gagaatatct aaacttatag attcagagta cttcataaca
1441 gaaagtaata acatcatttc acaatccgaa gaaactttaa aacttgcgaa agacgtatat
1501 gataaaaaa ccaaactgat agaggacctt acactgtatc cacacttaga aattaacgaa
1561 ttcaaaaaag actacgacaa caatgtggaa gatttgagag aatctatcat ctacatacaa
1621 tcatacgtct catctattaa agtgcgtat agatataatg tgttagaaaa ggactctgta
1681 gaaagtaaac gaaagaacat accagctaac agtaatgcc aggagaaagt cgatgagctg
1741 ttgagcatta tagatagcat aagttatagc aatttttccg tagccgagaa ttttcaaaaa
1801 atgaaagatt actataaaga aatcgaaaaa ttaaaaaatca aaatactgca attaatagaa
1861 gccattaaaa aataccaaca acatgtggaa gaattaatca acaaggaaaa agcagttgcg
1921 atctcacaag aagatataaa taaaataata gaatatataa aaggaataat agaaaaattg
1981 aaacaactaa tttctgcaaa taaagatttt gataaaatth tccagcaagt tgaacaatta
2041 attaacgaag cgctttttta caaagaccaa tttgaacata ataaaaatga cttacacacc
2101 aaaatgaaag aaataatgca tacattttcac gagcgtgatt tacaacaatt tttggacaat
```

2161 atgtcgaaat ttttaaagga ccaagaagct tcctaccaa atgcagacag taaggaaaag  
2221 cttgaccaac tgctaacaac agtaaaggca aaacaagatg aacttaaaga gatgaaatgc  
2281 gatgacattc cagacataat cgacaatttg aaaaaagaat cgcaaaatgt tttaaatcta  
2341 aaagatgagg tcataaataa acagtttgaa aatatgcgca cagaaatgct aagttcattg  
2401 gatcaaatga ccaaagagta taacgctctc aaaagcagca tagaggaata cgaagcggaa  
2461 aaaaaaggaa tagaaaacca taaacaaaat ataattaaaa gaaaaaatac attcatcgtt  
2521 gctgaacatg aaaatgatga agatgtgccg gaagggaaaa atacctaca cgagtttata  
2581 agcaataaag acacaatfff gcaaaaagaa agcgcatta gcaaccagat gaacacatta  
2641 gaggaaaaaa aaagaaatag aaaaactacg ttacaaacat atggtgacgc aatacaaaaa  
2701 ttagaaacgt aactgaaaa gaaggatgaa gaaactaaag tgctgctaga aaagtttaac  
2761 accgaagtgg aaaacttcaa actagatgaa gatgaaaaat catttaacga tgccaaaagt  
2821 attgtcagta acacaataaa tgaagtcgaa aatgaaaaaca aaaatataga ctccattaag  
2881 aaagtgaata ttgcaatgaa acgctccaga agtaaccaac aatccggtga acagctaatac  
2941 agaaataaag ataatcttct aaaagaaaa atggaaaaac actttcaaaa aataaacaca  
3001 gatgaaataa taggacaaag tgccaaggca aacttgctaa acaatctaga gagcgaaaaa  
3061 gctatcataa acgaacagtt aaatgacgct catttgaatg acctaaaatt gcagatagaa  
3121 aaaactctaa gttattgtga aaaatcaagg gaaaatatta aaggaaataa tggaacacat  
3181 ccagaagaat taaacgcaag cgaaattgag tgggaagcta cgaaaggaaa aatagaaaaca  
3241 ctaaacagta attatcaagc gttaaacaaa aacatggatg atataatcaa taagcagcac  
3301 gatgaaatga tagtgctcat tgatagatg ataaaggaga agggaaaaga catcgagcctt  
3361 aaagttgagc aacgtataca ggcgctcgaa aaaatgaaag aaaattgtc ctcatttgat  
3421 accaatgagg atgttaaaaa ataccaaagt gacataaata aagaagaact cataaaatta  
3481 aaagaaatgt ccaactgcagt cctaaacaaa attgatcaaa ataaaaatca attgattaac  
3541 gtaaagacaa aatccagtgg ctacgtcgca gaatcgaatg gaataaaaaa taaacaaacc  
3601 gaaccgagtc aagagaaaga caagcaaatt gtgtacaaca caaatagggg tgacatcgaa  
3661 aaagtttata aaaacattag agacatgtac aacgaactgg atgatgtcga aaagggagaa  
3721 accacctcaa acgaagtaga caacatagaa atgcagtatg acagactttt aatcaatttg  
3781 cttgttcaaa agatcaacga agaaaacaca aaggcgaagg gactcatgga agaaattaaa  
3841 tcatacatag aaaatattga aagtgtacag gccaaaatgt cagatgaaac gcgagaaggc  
3901 gcaactgagt ttgagtttaa tcaatatcag cagagcagtt tagccaatga taaaaaatt  
3961 accgaaattg ttcaacatgc tataaataag aagggagaag cagaaagaag taaaaaacg  
4021 aatgaagtaa aatccatcaa aaatgacgtt aacacttaca tgcaacaagt tatagatgaa  
4081 tataacgcta tgcaaaaggc gttaggggat attaaaaatg tgaacgattt attaatatca  
4141 accagtggta gaagaatcgc tgaagaaata tcgaagagca ctaacgaagc tgagaatfff  
4201 gaaaagcaag caaaaggaga attagggaaa ataaatgata taattgaaaa aatggaaaat  
4261 caaatggttc aggcaaagga acacgaaaat aaaattcata taaactaga ggataaaca  
4321 atagatgaag aagtgcaaaa aattagacaa attcattgaag aacttataaa tacgaaaatt  
4381 gcaatgaatg aacattttaag taagacaaaa gccgctaaag aaaattgcct ttccaagtc  
4441 cgtaatgccg agagggggaa aattaaata gattttctca ataataacaa acaaagtagc  
4501 aatttgaaag acgtcaatat ggatcatgta actaaaaata ttgccgactg tgtggaacac  
4561 tcaaaagaag ttaataaaaac tgaaaaagaa gctgaaaagg aacatgacct attcctagaa  
4621 tatgaaaaag atattaccag catattaaac agatcctcaa ttttaggaat agaaacaaaa  
4681 tcgaaaaaaa gaaaaaacga agctaccaa ataatgggccc aaattgaggg ggaacattct  
4741 ataattaaaa cggaacttca acaatcttca gaaaatttta aacaactgaa tgaaaaatat  
4801 aaccttagcg aagaagaaag tatgcttgcc aatcccacat ccaccaagc aatgagtc  
4861 atacagtata acataggcaa ggtgaaacaa aatttgttat acatagacaa tatagcgaaa  
4921 gaagtagaca ctattttaac taacgcacaa gattcaatta gatcaatc gcagatttcc  
4981 aaactagacg gaaggaatac actacaaatg gtggaaaagg aagcagcaga ttatgtaaaa  
5041 ttttagaca aaataaccaa agagaaggaa ctaatgaatg ataaacaaa agacctcaat  
5101 cccataaagt ccgatattgc aaatatgaa acagaattga aaaagcatag gaaactttc  
5161 gaaataggac ttttgaataa ggttatcgag atagctaaaa cgagaaaatt gtacatggat  
5221 tcagtggaac agctcctaaa ttctccatc aataatfff ttaccctctt taatgggttc  
5281 aatttaaaaa aatataaaat tgaaaccagt ttagacgttt ataaaggaaa aataagttaa  
5341 ttccacactg aattccttca gccatacgaa tcaattcaaa ataaggaaaa acgcgtactg  
5401 gacccttcg tagatfff tagcagcaaaa aatatgagcag aagaagctca aaaggaggaa

5461 aaaatatacg aaaatgtaga aaaaagaca aaaaatatac taagcgatat taacaaatg  
5521 gaatccttta cattcatagc taatatgaga caaacttttg atgaactaag caaacatgc  
5581 aacaggaat acgcagaagt cgagggaggt cacaaagaca ttgaaaaat catagaagat  
5641 attaagagcc taaacgatga aagtggctcg tcagctaaat tacaacaagc agaggataaa  
5701 aatagccaaa tgaaagccaa agtgaatcat tattcactta agaaagaggc acacactata  
5761 ttagaacaaa ttgtcaaadc agccaatddd gtaggcatta caatagtgc agcgttacag  
5821 ccatcagatt tagctgctaa agcgagtttg caaaaagcac cagaattgca gtttgaatcc  
5881 caatccaaag taacactaga aagcggacaa ttcttagaaa aaaaaacca attggatgtc  
5941 cacgaaaatg tgcaagccgc ctacaatacc gttcttcaga tatacaataa ttcagatgat  
6001 atagtaagga agcaggaaaa atgcgaacaa ttagtaaaag acggaaaaga tatatgcctt  
6061 aaattcaaat caataaacga aattaaagt atgattcaaa atagtaaggg aaaagaaagc  
6121 accctttcag ccaaagttag tcaactcctt aacaagctaa gtgagctaaa caaaattaag  
6181 tgcaatgatg aaagttacga tgccatdddg gaaacacca gtagggaaga actaaacaaa  
6241 ctaaggagca cttttaaaca agagaaaagc accatcgcaa accaagcaaa attgagtggc  
6301 tataaaacag atttcgaaac tcacattgga aaattaaatg acttagccaa aatagtggac  
6361 aacttaaaag ccagcgaaac tcttccaaaa aatatagaag aaaaaaaaaac gtccatcaac  
6421 ctaatttcaa ccaaattgga aaccatcgaa aaggaaattg aaagtattaa ttctccttt  
6481 gatcagttgc tcgagaaagg aaagaagtgc gaaatgacga agtacaatt ggtaagggat  
6541 agcctaagca ctaaaataaa tgaccattct gcaatcatta aggacaacca aaaaaagcc  
6601 actgaatatt taacgtacat tcaaaataat cacatttcca tatttaaaaga cattgatag  
6661 ataaatgaaa acctgggtga aaaatccgta agtaggtatg ccatagccaa aatcgaagaa  
6721 gcaaatgatc tttccgcaca gtaaccgct gcagttagtg aatacgaagc gatagcta  
6781 tttattagaa aaaaatttac aaatataagt gaccacaccg aaatggacac tcttgaat  
6841 gaggcaaaaa tgttgaaaga acattatgac aatctaataa ataaaaaaaa catcataaca  
6901 gaattacata acaaaattaa tttaattaa ctgcttgaaa taagagccac ctttgataaa  
6961 tacgtcgata tagctgaact gcttgccgaa gttagtaagg atcaaaaaaa aaagttacaa  
7021 gaagcaaaaa ataaactgga cacgcttaaa gaccatatac cagttaaaga aaaggagtta  
7081 atcaacctag acagctcctt caccctagtg tccattaaag cgttcgacga aatataatgat  
7141 gacattaaat ataagttagg ccaattgcac acattagaag taactaactt tgatgaactt  
7201 aaaaaaggta aaacgtatga agaaaatgtt acccatttat taacagaag ggaaacctta  
7261 cagaatgatc tccacaatta tgaagaaaa gacaaactga aaaatacaaa tatagaaatg  
7321 tcaaatgaag aaaacaacca aataagacaa accagtgaag taataaaaaa attagaaagc  
7381 gaatttcaaa acttgctaaa aattattcaa caaagtaaca cgctatgcag taatgataat  
7441 ataaaacagt tcatttctga tattctaaaa aaagtggaaa ctattagaga aaggtttgtc  
7501 aagaattdcc ccgagagaga gaagtacat caaatagaaa tcaactacaa cgaattdaaa  
7561 ggcattgtta aagaagtaga tacaatcca gaaataagca tatttactga aaaaataaat  
7621 acatatatac ggcaaaaaat tagaagcgt caccatttgg aagatgcca aaaaataaaa  
7681 gacataatag aagatgttac aagtaactat agaaaaataa aaagttaact ctctcaagtt  
7741 aataacgctt tagatagaat taaaataaag aaaagtgaga tggataacct atttgaatca  
7801 ttgtccaaag aaaatgcaa taattataat tccgcaaaat attdtttagt cgattcggat  
7861 aaaataatta agcattttaga agaccaagt agcaaaatgt caagcttaat aagttacgcc  
7921 gaaagggaaa taaaagaatt agaagaaaa gtgtatagca tattaatcg acctgttatt  
7981 gataactccg cttcggagca aatcaaaactg ttaagtgata ccaagagaa cgatacagac  
8041 gaagctcaaa aacgggaatt tgctgaagaa caaattctga atttacctaa acaacagata  
8101 cattcagatg agggcaacaa taatgatatg agcactacag atagtgcaaa tgaagagaaa  
8161 caaactggag aggaagaatc acaacatgag gatcagtcac aaccaagggg gatacatagt  
8221 cgagttcgcc ttgcagaagg aattatdddg ggattatctg tcttttcagg tattatddd  
8281 atctcattca ggcataagga tgaggaaaag aaagaccctg aatccgtcgg ggaacaattd  
8341 gaaggaataa acaattdtaa tgaagacgat aaggaagaag tcatagacgt ttgcttcgac  
8401 aatagcgatt attctgaata g

//



LOCUS Pvrpb2c 8457 bp mRNA linear INV 09-NOV-2015  
 DEFINITION Reticulocyte binding protein 2c cDNA, full length CDS.  
 ACCESSION Pvrpb2c  
 VERSION  
 KEYWORDS .  
 SOURCE Plasmodium vivax (malaria parasite P. vivax)  
 ORGANISM Plasmodium vivax  
 Eukaryota; Alveolata; Apicomplexa; Aconoidasida; Haemosporida;  
 Plasmodiidae; Plasmodium; Plasmodium (Plasmodium).

COMMENT

FEATURES Location/Qualifiers  
 source 1..8457  
 /organism="Plasmodium vivax"  
 /mol\_type="mRNA"  
 /db\_xref="taxon:5855"  
 misc\_feature 1..4567  
 /note="isolate VKBT95"  
 misc\_feature 4568..4721  
 /note="isolate VTTY57"  
 misc\_feature 4722..8457  
 /note="isolate VKBT95"

BASE COUNT 3927 a 1074 c 1376 g 2080 t

ORIGIN

```

1 atggaaaaaa atgttctttg ggtaaatcttt tacaatttcc tagttattct tttggcatca
61 tgtaatgatt ctaatcggag caaatctaac agtctaataaa gtgaaagtaa gtcggtaccg
121 acatatgcta atttaatgag gaatgggtcaa gacaaataca acaatgctaa aacggaagat
181 aatataggta atcagatcaa caatgacaac aaccataacg gatataatga taacagaatt
241 aatagtgaat atcccaaaac atcacatcta cagcatagtc cgtctttggg acatttaaat
301 gatcataaat ttacgacaaa accatctcga cattcttacg tacaagaaa cagcatatat
361 aaacgtaaca caaataataa tatggaaaat acaataaacg aattgcatgt tgttccaaat
421 ttttttattc aagaaaaaaa agcagccccc caaaagccat ctgtccaaaa tacaccaacg
481 gccactcaaa ttgtatataa taatttggac tacctcaatg ccttcgatga cactaataat
541 ataatttctg cgtttaaacc tcaccacca attatatatt acttcaagga attggaacat
601 tttgcaaata gttactatga cctgaggagt aaaattaagg attattttgc tcttccgatg
661 aaacaggcct ccgatgtggt agaaaaaaat gtaaaagact gtttgagaa cataaatgaa
721 tcgagaatat taatgactca gttagaaaat ccccaaaact ataatgatat aagtataaaa
781 tatgatgaaa aagtaaaaga atacaaaag aaaattgagg atatgcaaat ttgtttaaaa
841 gacagttata taaaaaattt taaagctatc atgtctgcaa atttaaaaat gaatctagct
901 ttaaaccgaa tatatatcca ctgggtggtac ctaacatggt cgacgaaaac ttacgatgat
961 atagttaaag aatatgcaat agagattaac gattttgatg aaaaaaaatc gatttctttt
1021 atggataata tgaagaaaat acataagtct gctattgata cattgaagaa aatgaaagca
1081 gaattaaata caagtctgga ttctaaaaga acagaattta taataggaga aattggacat
1141 atgatagaaa agtttaatct tcatttgact aaaattcgtt atgcatctgc ttttatcaaa
1201 agtattcctt tacaaaaggt agaaagtgac atttatcgag ttgaaactaa aactcttttt
1261 tatgtggcag ctaaactacta cgctgatttt aaatttagtt tggaacattt aaaaatgttt
1321 gaaaatttat ccaaaagcaa agaaaaaatg ctttatagca cttttgaaaa attagagggt
1381 gatttactaa ataaaataaa cacccttatg ggttctgaac agtctacctc tgatcttacc
1441 tctattattg cggattctga aaaaatcata aaactgcag aatcattaat taattcagat
1501 tctgaagaga tagcaaaata tgcacttgat tcaaatgaga aaattaatga gataaaaaaa
1561 aattatgacc aaaagatact cagtgtaaaa gaatttataa ataaatcaaa tgggttaatt
1621 acaactgtaa aaggtacatc taaactaagt gaatcagata agaaacagat agataaaaaa
1681 atagagaaag taaaaaaaaa tacaacactc ctagagaggg gaaatgagtt tataaaaaa
1741 atgaatgaag taaaaacaaa aataagcaat tcttctaata gcgctacaaa ttcaaaggca
1801 ttttctgata aattgaaaga attacaaact gaatttgaag gattaaataa aactatcgaa
1861 gacgatttgc aaaaaataaa tgagataaaa ataaaagaaa atgaggatcg ttctatgaaa
  
```

1921 gatcaaatag aacaacatct gaaagatgcg tctgataaca gtgaaaaagt aaaaagggtta  
1981 atttccaaaa ataatgaaat acaaaaaatat attcagataa ttgaaaatth gattaaagat  
2041 gcaccttctg gcaaagacaa atttacatct gagaaaacag atttgcaaaa caaggtaaag  
2101 gaaataatca atgagtttca tacgggagat ttacaattat tattaaatag tttatcaaca  
2161 ttttacgaga aacaccaaaa gttatacagc ggagcaagta ctatagaaaa cattaaagag  
2221 ttgcacccaa aaataaaaga agaatatgaa aaacttgaaa aaaagaatta tagtaatatt  
2281 gatcaaacat tacataatth ggatgcagaa ctagataaac tgaaagctct agagaaaaat  
2341 attgtagaag agcaactaa taatatcaat aaagatatga cagattcgtt gactaagtta  
2401 aataccgaag tcgacagtht gagaaatgcc ttggatggct ataaggcgga tgaaagtgag  
2461 ctcaaaacct ataaaaaccg aatgaatgaa aggaaagaaa atthttatcag tactthtaag  
2521 gaacaagagg atgatattcc agatggaaaa aatattttatg aagagtgtaa taaacataaa  
2581 ggtgttatgg ataacaaaga acataaaata actagtgata taaatcaatg caaagaaaaat  
2641 attgtaaatg ccgaaaaaaa tatagagaca ttcaatactc tagtgaaaac attagaagca  
2701 cacacaggta aaacatatcc agacgctcat acttcattgc aaaagcttaa aagtaatcta  
2761 gaaaatthta atthtgagtga actcgaaaat gaatthtaaat ctctcttcga ttcagctagt  
2821 acaaccaata aacagattga aatatataaga aaaaatatag acacaattaa atcattaaat  
2881 tttacgaaaa atagttcggga cagcagcaaa ttgtcattgg aaaagataaa agaaaaataa  
2941 gcagattthta taaaaaaact agaacaacac actcaagaaa tagaaaaata cacattcata  
3001 gaaaaagaag aaacgtcacc cthtttaagc gtttacgag aagaaaaaaa ccgctgacag  
3061 cgtgacatgt ctgaagagtt gataaacagc thaaacacaa aaattaatga tatactggaa  
3121 tattacgata aatcaaagga tagthttcaat ggggatgatg aaaaaaattt ggaacaatta  
3181 gatgactthta aaagaaagtg ccaagatgth caacaaggaa tagaaaagth aacaactaac  
3241 tataaagtat tagaaaaatg gataaatgac ataattaaaa aacaacatga gaaagttata  
3301 acaatgactg aaaatcatat aacagggaaa gacaaaaaga taaatgaaaa gattcaacaa  
3361 aatgtaaatt cgctaaatga aatgaaagcg aaattgggth tactcgaaat taacgaagat  
3421 atcaaaaaata gcaaagatgt tacaattaaa aataaaatac aggaatttga aaacaaagth  
3481 aaaactatac ttggaaatat aggtaatgct aataataaaa tagatgcaat taaaagagtg  
3541 catgatgcga ataaagttga attcgataga gaaaaagtha aaaaaacaag thtcgatgaa  
3601 aaaaaggaaa tcataggaaa agthttatcaa caaatggaaa aaactcttaa agaattagag  
3661 gaaatggatg acgaaagtag catacaaaa gatgtagacg tagctcaaat actatacaga  
3721 agaattthta ttaatcatgc tgthtaattg atggatgatg aagthtgaaaa gtccaaaact  
3781 gtgatggcag aaatcgaaat atataaaaa gaaattgacg aaactaaaca gaaaacgatt  
3841 gaatataagc aaggtgatac atctaattth gattatacaa aagaatacaa caatgctaca  
3901 cagagtaaag ctaaaataga aaattthatt gaaaatgtha agacaaaaaa aggaacgtct  
3961 gacacaagcc aaaatataaa agaattagaa agtattaaag aagaggtgca tgataattta  
4021 caacaagtca aactagaaaa tgthttctatg gaggaaattc gaaaacaaat tcttaatatg  
4081 aaaaattthta taatttcgaa caattctgaa accatagcaa aagaaatath aaataaact  
4141 caaaacgcat taggthtttag ggataatgca aaacagaaac thtaataaaac aatgaacta  
4201 ttacaaaagtg tggagctaa gatagctgag gcagaggcac ataaaaaaa aattggcata  
4261 gctthtagaag atggacaaat agacacggag gtaagcgaaa ttgaaacaaat taagcgagaa  
4321 attataaata aaaaaaatga aattgaaatc thtttaaatg aaataaaaga atataaagac  
4381 aatgcacaaa ccgaaatcag taattcaaaa agaggaaaag ataaaattga gthcttgaa  
4441 aaattthaagc ctaatgagga aagcaatcgg aataaggtha acattaatga aataaatgaa  
4501 aatataagaa attctgaaca atacttaaaa gatatagaag acgcagaaaa acaagctagt  
4561 acaaaagtag aactattcca taacatgaa acaactatca gtaatathth caaggaatct  
4621 gaaattthtag gagtggaaac thaatcccaa aaaaaatta ataaagcaga agacataatg  
4681 aaagaaattg agcgtcacia ttctgaaatt caaacacagg tgaaagthth ccaagaaaaat  
4741 ctaaataaac tgaacgagcc ccataattat gacaacgcag aagatgaaat taataatgat  
4801 aaatctacga atgcaaaggt acttaacatg actaacctag aaagtghaa acataattta  
4861 tcagaaatta ctaatatthaa acagggagga gaaaaaatat acagtaaagc taagaatctc  
4921 atgcaaaaaa taaaagcaac thcagaaaat actgcagaga aaactthtag gaaggtgaaa  
4981 gacgaccaat ctaattatgt taattathta aatcaataaa ccacagaaag aatctthctc  
5041 gttacgghaaa aaaatagact aaatggtata gattccacta ttacaaatat agaaggggca  
5101 ctthaaagaat ccaaaaagaa thtatgaaatt ggattthttgg aaaaagthtag agaaataggt  
5161 aaaaatagaa aattaaaggt tgacataacc aaaaaatcaa taaattcaac agtggghaaac

5221 ttttcttccc tcttcaacaa ttttgattta aatcaatatg actttaataa aaatataaat  
5281 gattatgaaa ataaaatggg agaaatatat aacgaatttg aaggatcatt aaataaaatt  
5341 agtgaaaatt taagaaatgc ttcggaaaac acttcagact ataactcagc aaaaacactg  
5401 aggctagagg cacagaaaga aaaagttaat ctattaaata aagaagaaga ggcaataaaa  
5461 tatttaagag atgttaaaaa agtggaatca ttcagattta tatttaatat gaaagaaagc  
5521 ttagataaga ttaatgagat gattaaaaaa gaacaactaa cagtcaatga aggacaaggt  
5581 aacgttaaac aactagttga aaatattaaa gagttagttg atgaaaacaa cttatcagat  
5641 atattaaaac aagcgacggg caaaaatgag gaaatacaga aaataacgca ctctacgctt  
5701 aaaaataaag caaaaactat tttaggacac gtagatactt ctgcaaaaata tgtaggcatt  
5761 aaaataacac ctgagttggc actaacagaa ttgttaggag atgcaaaaatt gaaaactgca  
5821 caggaattaa aatttgagtc aaaaaataat gtagtactag aaacagaaaa tatgtcaaag  
5881 aatacaaacg aattggatgt tcataaaaaat atacaggatg cttacaaggt tgcactggaa  
5941 atacttgccc actcagacga aatagataca aaacaaaaag acagttctaa ataatagaa  
6001 atgggaaaacg aatatatct taaagttgtg ctaataaatc aatacaaaaa taaaataagc  
6061 tctataaaaa ttaaggaaga agctgtttca ggcaaaatag acaatgtttc caaaaaacat  
6121 agtgagttaa gcaaaattac atgcagcgat aaaacttacg ataacatcat agcgttagag  
6181 aaacaaactg aattacaaga tctacgcaat tctttcacgc aagaaaagac cgaacgaaat  
6241 agcgattcga agttggaac aattacaaaa gatttcgaaa gtttgaaaaa tgcattaaaa  
6301 acactggaag gagaagttaa tgctctaaaa gcaagctcga acgatcatga atatgtaaaa  
6361 ggtaaagatg caccaataaa tgctgtgcaa accgaaatgg aaaagacaga aacaggcata  
6421 gatagccttg atacggcctt tcatgaaata ttacaaaaag gaaggaaatg cgaagtatct  
6481 aggtacacat tgataaagga taccgttctc aaagaaataa gtgatgacac cgaattaatc  
6541 aacactatag agaagaatgt taaagcatalc ttggcatatg ttaaaaaaaa ttatgaagac  
6601 acagtgcagg atgttctcac attaaatgaa catttcaaag aaaaacaggt aagtaatcac  
6661 gagccaacta attttgataa atcaaataag tcatccgaag agttaactaa agctgttact  
6721 gactcaaaaa caataataag taaactaaaa ggtgtaatta tagaagttaa cgaaaacact  
6781 gaaatgaaca ctatagaaag cagtgcacaaa gaaattgaag ctctctataa cgaattaataa  
6841 aataaaaaaa catcattaaa cgaaatttat caaacatcaa atgaagttaa attgcaagaa  
6901 atgaaaacaa atgctgataa atacatcgat gtatctaaaa tatttaacac tgtattagac  
6961 actcaaaagt caaaaatagt ggctaataca aatagtataa acagtgttaa aggccaatta  
7021 aacggaaaagc taaaggaatt aattcaggct gacagctcat ttacattaga gtccattaaa  
7081 aagtttaacg aaatatatag tcatattaag actaatatag gtgaaactaga acagttacaa  
7141 caaactaata aaagtgaaca tgataatgtc gcaaaagcaca aagaaaaaat tgtacattta  
7201 ataaacaggg tagaaagttt gaaaggtgat gtgaaaaatc atgatgatga ccaatatatg  
7261 aaaaaattaa atgctagtct attaaatgat aatattaaaa atacaacgaa ttctataaac  
7321 atatcagatg aagaacttaa gaaactattg aaaaaagttg aagagaatga tcagctatgt  
7381 aaaaataaca atacgcagaa cttcatttcg gacattatga aacgtgtaga agacttgaat  
7441 agacgattta cagaaaatth accggaaaaa gaaaaacttc atcaaatgaa aaacaactat  
7501 aatgaaatta gttcaatatt tagtgaaata aacttacaag acgtcgatga atttgttgca  
7561 aaaattcaca acaaaattga tgctgaaaag gcaagcgtaa ataatgtaag agaggctgaa  
7621 aaaataagga ccgcaatcca aaatgttaca agttatgata cagaaataat aagtagacta  
7681 tctgaaatga ataatgtact agaaaggatt actacacgga aaacaaaaat ggatcaatta  
7741 ttaaaatcat tgtccccaga taatacaagt ctaaatttaa atgcaagaac acacgtaaag  
7801 aactcagaag acttaattaa taggctaaat agccatatag aaaaaataac aaaactaaat  
7861 acacatgccc acgaagtaat gacatactta gaaaatgaac taagtaaatt attaaaacaa  
7921 cttgaaattg aaagtgcaaa agttgagcct gaagctttgc caagtgatac ggaagtaaaa  
7981 gaagaaaaag ttccaccaac ggtaacagaa aatgggtccac aagagaatth gacaagcgtt  
8041 ccccaagaga catcagaaga taacacacca cagatccaag aaaatgttgt acaagaggat  
8101 tcagtaatcg ctctcagga gcaagttaga tatagtacac tagcggtagc agaaaatgat  
8161 gaaacaacg aagaagaag tgaacttagc gatgcgatg acgatacga tgcagaatca  
8221 caaactggaa gggattcaac ggcaaaagaa gcaattggaa agactcgttt gacaggagct  
8281 gttattattg ccatgtctgt tttatccgga tttattataa tagtatttaa agataaagat  
8341 gaagaagaaa aggatcacia cgaacacgga tataacgaag catttggaga acatgacgaa  
8401 tataatatgc atgataaaga agaagttatc gaagtttgct ttaatgaaga agattaa

//

LOCUS Pvrpb2p1 1869 bp mRNA linear INV 09-NOV-2015  
 DEFINITION Reticulocyte binding protein 2p1 cDNA, full length CDS.  
 ACCESSION Pvrpb2p1  
 VERSION  
 KEYWORDS .  
 SOURCE Plasmodium vivax (malaria parasite P. vivax)  
 ORGANISM Plasmodium vivax  
 Eukaryota; Alveolata; Apicomplexa; Aconoidasida; Haemosporida;  
 Plasmodiidae; Plasmodium; Plasmodium (Plasmodium).

COMMENT

FEATURES Location/Qualifiers  
 source 1..1869  
 /organism="Plasmodium vivax"  
 /mol\_type="mRNA"  
 /db\_xref="taxon:5855"  
 misc\_feature 1..1869  
 /note="isolate VTTY57"

BASE COUNT 813 a 264 c 276 g 516 t

ORIGIN

```

1 atggaaaaa atatcctgtg ggtaatcttt tacaatttcc tgtttattct tttggcatca
61 tgtaaggaca cacatcgaag caaacctagc agactaaaac atgaccataa tttattgcc
121 aattacgtta atttaatgaa ggatgatcaa aacggacaaa acagtgaaaa cagaggagac
181 aacataaaca atcacaataa aaaccataac gatcagaaca accataatgg taataatgat
241 aacagcatta atagtgaata cctaaaaact tcacatctac agaatagttc ggccatggta
301 cacctaaatg atcataaaat tacaacaaag ccagctcgct attcttacet acaaagaagc
361 aaaatatatg cacttaaccc aaataataaa aaaatagaaa atattaataa cgaattgcat
421 agtgttccaa attcatttgt tcagtattat gtatacacca atctaaatgc tacagtatat
481 aagatgcggt acattagtat cttcgatgag tataataata tagtttcttt gcatctgcct
541 tatcatgcta gagtaaatta cttaatggaa ataaaaaatt attcagtggtc ttatagagaa
601 ttacagagtg atgtttatag ttattatgat ccacaaatag acaaagtttt caaggttgca
661 gagaaaaatg caattgtctg tgaaaagtac ataaacaatt tatataatac agtaactcgt
721 ttagaaaatc cagaacaatt taaaaataac agagacaatt attccaaga aataaaagaa
781 taccaaaaac aacttacgtc cttcatgat tgcttatttg aaaatcatag accaaattac
841 aaagacataa tatatgctga tacaacaatt ttcgattctt tacaaaatat atactgttat
901 tcggaagata aatgtctatc aaaattgtat cgtgatatgc ttggtttatc tatgaaaaaa
961 attaatgaat atgaacagaa aaaaaaaaaat gaagatataa ataaaattat taatatacac
1021 gatactgctg tagatgtaat gaggaaaata aaaagggat taaatccaag cttaaattct
1081 gatgtggcag atttcgtaat aggtgaaatt aatatatta tagagagact taaggcacac
1141 tcagaaaaaa ttaaagtgc atccgatttg gtaaaatata taaatcaaga aactgtgccg
1201 aacgaaatct caaaaatga gattaaagt aattatattg tgttagctat tcacaccggt
1261 tcctttcttt ttagtactga acatgtaaaa atgttagagg aatattcaa aagtaaagaa
1321 caaatacttt acaaaatttg tagtaaat tttgaatgact tgaaaaacag aataactact
1381 ctgataaatt cggaatattc ttcacaaac tgcactccta ttgtttctac ttgtgaagaa
1441 gccaaaaaat ccttagaatc cttgcgtact tcgagaccg gaaaactagg taagcatgat
1501 ctaaattcaa agccggaat tgcatcagtt aaacagagtt atgatgggaa aatgattaaa
1561 ttagcagaag ctataaaaag agccgaagaa ataatacaatt ctgtaaagga catcgttcag
1621 tttaacacaa ccgaaacaga agcaaagaaa agggaaacag atagcatacc ccaaaatata
1681 aatgcactag agaaggataa aaaactttta gaagtaatag atgcaataaa aaaacaaaaa
1741 caaaaaatat cggaaaattc taacaaaata aaagaat ttt ctggtgcagc tgatacttta
1801 aaagctgaag tcgaagaatt aaagaaagg tttgatgaag atgtaataa aatattaaag
1861 ccattctaa
  
```

//

LOCUS Pvrpb2d 8492 bp mRNA linear INV 09-NOV-2015  
 DEFINITION Reticulocyte binding protein 2d cDNA, pseudo gene.  
 ACCESSION Pvrpb2d  
 VERSION  
 KEYWORDS .  
 SOURCE Plasmodium vivax (malaria parasite P. vivax)  
 ORGANISM Plasmodium vivax  
 Eukaryota; Alveolata; Apicomplexa; Aconoidasida; Haemosporida;  
 Plasmodiidae; Plasmodium; Plasmodium (Plasmodium).

COMMENT

FEATURES Location/Qualifiers  
 source 1..8492  
 /organism="Plasmodium vivax"  
 /mol\_type="mRNA"  
 /db\_xref="taxon:5855"  
 misc\_feature 1..638  
 /note="isolate VTTY67"  
 misc\_feature 639..1346  
 /note="isolate VTTY59"  
 misc\_feature 1347..2419  
 /note="isolate VKTS93"  
 misc\_feature 2420..3261  
 /note="isolate VTTY55"  
 misc\_feature 3262..3940  
 /note="isolate VTTY49"  
 misc\_feature 3941..4392  
 /note="isolate VTTY67"  
 misc\_feature 4393..4839  
 /note="isolate VTTY49"  
 misc\_feature 4840..5827  
 /note="isolate VTTY67"  
 misc\_feature 5828..7073  
 /note="isolate VTTY49"  
 misc\_feature 7074..7487  
 /note="isolate VTTY55"  
 misc\_feature 7488..8492  
 /note="isolate VTTY67"

BASE COUNT 4032 a 1003 c 1338 g 2119 t

ORIGIN

```

1 atggaaaaaa aagccctttg gatcatcttt tacaatttca tacttattct tttcgcataca
61 tgtaaggatg tcaatcgaaa caaacccgga agactaaaat atcatcggaa gctattacca
121 gcatatgtta acttaatgag ccctgataaa gacggatata agggtgccga aaaggatgat
181 aaggcaataa atcataacga caacaataat ggcaacaata atgacaacaa taataatagt
241 gacaataatg atgaaaacag taataatagt gaaaatctca gaacgtcaaa tttacaaaat
301 agttcatcag tggggcattt aaacaaccac gaagatacaa cgaaaccatc ccattattct
361 tacttgaaaa aaagcaacat atatgcaccg gatgcaaaga ataataaaat ggaagatgat
421 aataaaaaat tgcatactgt ttcaaattcc ttcattcaaa atagtaaaca agcccaaaat
481 ataattgcaa ctaataattt ggattatatt agtgccattg atgattataa caatataatt
541 tcttcatttc aaccataaca tgctagtgta tattacttga atgaattgaa atactatgca
601 acacattaca atgaattgaa ggttcttggt caaaaagatg tcattcctca agtaacacac
661 attaccaata ttggtgagaa aaacgttaag atctgtttgg agaaaacaca tgaattgaat
721 acattaataa ctcaattaga aaatccacaa acatataata ttcaaagaag ccattatagt
781 aatagagtaa aagattaccg taagaaaatt gaggatattc aaaattgttt aaaattaaat
841 tataaaagaa atgttaaagc tacagtattt gccacaataa tatgggtcca gacactaatt
901 aaaatggaat gtagttggtg gaccaaaatca tgttcaacga gaatctatta taatatgatt
  
```

961 aagatgtata cattaanaaat taaggagtat aaaatcaaaa aaccaactgc atatatggat  
 1021 aaaataaagg ctgtttataa gttagctaata gatacaatat ggagaataaa agtagaatta  
 1081 aactcaaatc ttgattcggga tacaaccgac tttattctag aagaatttaa atacattata  
 1141 gaaaagtata atggtcacat tgataaaatt aatttgggaa cttcttatat agatcatatt  
 1201 catgaacaag aaggaacttt gaataaactt aaaatagaaa ttataacttt gtattctgtg  
 1261 atagctaatac gttacactgc ttttaaatth agtttagaac atataaatat gtttgaaaat  
 1321 acatccaaaa gtaaagaaca ggtactttat aactctttta gcaaatttga ggatagatta  
 1381 caaaagaaaa taaacgatct tattaattct gaatthttctata tatcaaccgt taactctgtc  
 1441 atthttggatt ccgaaaaaaa tatacaatta tcagaatcat tactcaactc gagttctaaa  
 1501 gaaatagcac aacatgaaat taaattaaat gcggaaattg aaaagaaaaaaa aaaagattat  
 1561 gatcaaaaaa ttataagagc aagagaaact ataaaaaaat caaaggaatt aattacatct  
 1621 gtaaaaaacg catttaagtt aagtttagaa gaaaaggaaa agatagaaaa gaaagtaaca  
 1681 gaagcaaaaa aattgccaaa cgctctagaa agagacaaag catatthaga cattatgagt  
 1741 gaaataagaa aaattaaaaa taagttatct gataatgcta gaaagacaac cgaatthact  
 1801 aaaaaatcaa atgctthtaa aaaggaagtt caagaattaa atacaagtgt taacaactat  
 1861 gtgcaagcaa taaaggaaca aaaagaaaaa gaaattcggga ataattctth gaaagatgaa  
 1921 ataaaaaagt thtttggaaata tatacctaata aacagagaaa aaataaaaga attaattacc  
 1981 aaaaagaatg aagtgaaca atatatthcc aaaattgaag aattaattaa agacgcacac  
 2041 thttgggtgat aagaatthac agccaaaaaa acagaattgc aaaatcaggt aaaatcaata  
 2101 attgatgcat thttataaga agacctacaa thattthttag acaatthtat aaaatthtat  
 2161 gatgaaaatc aagthtttaga gaaggaagct gatactacag aaaagattga agaactthcac  
 2221 aaaagaacca aaatggatta tgaaaaactt ctaaatatga aatgtgatga tataccgaa  
 2281 ataataaaaa agttgaatac agaattaaat aatctcaaaa atthtagaaaa aaatattgta  
 2341 gaagaacaga ctaaaaaacat taataaatat gthttcagatt catttgataa cctaactgat  
 2401 gaaatgaacc gthttagaaa tagcttgaat gaatataagc aggatgaagg taagctccaa  
 2461 acatataaag gtagtataaa tgaaagaaaa gacaaattcc tcaataactc aagcgaaaaa  
 2521 gaggaagata thccagaggg acaaaatatt tatgatgaat ataaaagtca taaagatctt  
 2581 atggttaaca aagaactthaa attatccagt gatattaatg aattcaagga aaatataaaa  
 2641 aaagtccaaa caaaaataga ggccttcagc agtgtaatgc aaaaattagg agcgaacgcc  
 2701 gatgaacaac atcaagaaac tataaattct thgaagaact thtaactaa aatcgaaggt  
 2761 thaaaattaa gtgaacttga aggtgaattt aaaattaaca atgaatcagc tgccaaatta  
 2821 tataatcaaa thgaaaatac aatgaaaaat atagacacaa thaaatcctt aaattatact  
 2881 agaaacagcg ccaacaatag cagagaatta atggaaaaaa tagtaaaaga taaaaatgat  
 2941 thaaataaaaa aactagatca acagtctgaa gaaataaaac aatacacatt aatagaagaa  
 3001 gaagaaaagt caccctthct aagcgctthta aatgaagaac aaaatcatgt agaaaagtga  
 3061 atthcctaaag agtcgataga caaattaaac acagaaataa atgctatact ggaatattac  
 3121 aacagthcaa agggtaattt taatgaggac acggaaataa aattggaaaa gthtagacaat  
 3181 thtaaaaactc aatgtgataa tattaagcaa gaaatagaaa cattaaacac taaatataaa  
 3241 gtgthtagaaa aaaggataga caccctaat gatgaacaac atgctaaaat tgtgacgthg  
 3301 acagataagc acataacaac caaagataat atgattaatc aaaagattga acatagcaca  
 3361 aaatcgctag atgatatgaa aactaagthg aattctctca aatttaacga tgatatcaga  
 3421 aagaatgaaa atgtcgaat tcaaggtaaa atacaggaat thgaaaaaat gthttcaact  
 3481 atagaggaaa gtataaataa aaataaaaact aaaatatatg aaattaaggg agtatacgat  
 3541 gtgtacaagg gtgaattcaa tgaaagaaaa aataaaagca caaaaatcgt agaaaaaaa  
 3601 aatagcatgg aaaaagthta taacaaaatg gaagatactc thaaaaaatt agaagatata  
 3661 gataacgaaa aaaatatatt aaatgaaata gaaaaggctg aagtactata caggaaagth  
 3721 thcattcata atactgthca tatgatggat aatgaaacta aaaagtctaa aaatthgatg  
 3781 gaccaaatcg aattgtctaa aagagaaatt gaggaacaa agaagcaat gctthgaatac  
 3841 aaaaatgatg aggtatctaa thtatgattat atgaaatatt acaaccaggc tacagagagt  
 3901 aatgctaaaa taaaagaaac thtttaaaaat gctacagata agaaagaaaa ggtgaaaat  
 3961 atcgaaaaag taagtgaat cttagacatt aaaaaccaag thaatcataa thtacatcag  
 4021 atccaatcag aaaaatagthc tatagaggag atgthtaaac aaattaataa tatgaaagat  
 4081 thattaaaaa cgaacagthc taaaggaata tcggatacag tattaagtag taccaaaaat  
 4141 gcagaagaat thggcaaca agcaataagt gaatthtaata aaacgaatga tgtaatacaa  
 4201 gcaatcagag atthtgataac taaggctgaa gcacataaaa atthtaatcaa tataaattta

4261 gaagatgaaa aaataaatgc cgaagtgaaa gaaattgaaa aaattaagga acaaattgcc  
4321 aataagaaag aagaaataga atcccatctg agcaaggcaa aagaatttaa agaaaaatgt  
4381 tcctcagaaa caagtaacgc caaaagaggt aaaagtaaaa tagaattttt gcaaagtcgt  
4441 gaaggcagtt cggaagaggt agatatgaag gagatagaag aaaatattac caaagcagaa  
4501 ggatatttaa atcaagccat tgctgcagaa acagaagcta ataagaatgt agaattgttc  
4561 ggtgaacttc aaaaaaatat ctgtgacatt ttcgatgaat catcaatttt aggaatagag  
4621 actacatcaa agaaaaaat taataaagca acagaaataa tggagaat taaaaggaaa  
4681 aattttgaaa ttcaaggcga ggtgaaaatt ttccatgaaa cactcgtaa attgaaagaa  
4741 acacaccctg ataacaacgt agatgctgaa cttaacaatg cgaaatcgac caatgcaaat  
4801 gtacttatac aaactaacct agaaatggtg gaacataact tatccgtaat agctaaaatt  
4861 aacaggagg gagaaaatat atataataga gcctcatcta cgataaattc catgacagaa  
4921 atctccaaaa atactgaaaa aaaaacatta gacaaggcaa aaagtgcga atctaaatat  
4981 atatcctatt taacccaaa aacttcagaa agagatctaa tcattgaaga aaggaataaa  
5041 ctaaattgta taagcccaa tataataagt atagaaaagg aattgaataa agccagaaaag  
5101 gattacgaaa ttggactttt gcaaaaagata gatgaaatag gcaaaaacaa aaaaaaaaaa  
5161 tattgatattg acaaaagaat caataaaatt aacattgagc aacttttctt cccatttcaa  
5221 aggatattgat ttaaaggaat atgtctttaa taaaaatata aatgactatg acaaaaagat  
5281 gaaagaaata catgacaaat atgacaaatc gataaataaa attagtaaaa acttgaaaaa  
5341 ggctgaagag gataatacaa actataccct agcgaatgag ctgaggaaa aagcgcaaca  
5401 agaaaaagca gaacttaca atatacaga agaagtaaat aaatatttaa gggatataaa  
5461 aaaatgggaa tcattcagat ttatacttga tatgaaagac aatttaagta atataaatc  
5521 actgattaaa caagaagaat taaaggttaa tgatggatat gaatacatta aacaattagt  
5581 tgacaatatt aaagagtcaa atgatgaaag cagtatatca gataacttac aaaaaggaaa  
5641 agaaaaaat gtagaaatc agaacaaaat gcaatctacg tataaaaaca aggcaaaagt  
5701 tatttttagga catataattg actccgcaaa atttatagat attaataaa ttacaaaatc  
5761 accactaaac gaattgtctt cagaatcaca tttgatgaat gcaggagaat taaaatttca  
5821 gcaagaaaat aaagtaacat tagaaacaga acatatgaca aacaataaga gcgaattaga  
5881 tgtttataaa aatatacgcg atgcttaca catcgttgtg gagataattg catattcaga  
5941 taaaatagac acaaaacaaa gacaaagtac acaattattg gatgatggaa atgatataa  
6001 tcttacgcta aagtcaataa acgagctaaa aaataaaata aactctgtaa aaagtaaaga  
6061 aatgctatt tcaggcaaaa tagataatat ttcaaacaaa cttaatgagt taaacaaaat  
6121 tacatgtgat gataaaagtt acgataatat tttagacata ataaacata cagaatttaa  
6181 aactatacgt gattctttta aacaagaaaa aattaacaaa aagagcgatt ctaaattgga  
6241 aaaaataaag gaagaatttg aaaattcaa aaatacatta aaaaatatag aagaagaagt  
6301 taatgctcta aaggctagtt tggtaaaaca tgataatata caaagcagaa acaagccaat  
6361 tgatgatgtg ctaatcgaaa tagaaaaaac agaaaaaggt atagatagtt ttagtgcctc  
6421 ccttgatgag atgttgaaga aaggaagaga atgcgaaata tttaggtata catccataaa  
6481 agatggtggt atcgcaaaaa taaatgatga cgcagaatta atcgataata tacacaataa  
6541 tactaatgaa ttttgacat atgttcaaaa aaattatagt gaaacagcag aggatgttcg  
6601 tacattaat caacatttca tgacagaaac gataagcgat catgcgcaa ctaattacga  
6661 aacatcaaat aatccttatg aagagataac tgaagctggt aataattcca aagcaataat  
6721 agataatata caaattcaa ttatacaagt taacgaaaaa acggaaatta gttctttaga  
6781 aatagcgca gaaaaaatag aaaaccttta taaagaatta caggataaaa aaaacaccat  
6841 aaacgaaatt tataaaaagg ctaacatagt taaattgcaa gaaataaaat cagatgctga  
6901 taaatatttg gatgtagcta acatatttaa taatgtattg gacggtcaaa aatcaagaat  
6961 aataaataac ctaggtaaaa tagcccaagt taaagaaaca ataaacctaa aactgaagaa  
7021 attggttgag actgacaata catttacgac agagtctatt aacaggtttg gagaaattta  
7081 taatgacatt aagactagta tagatgaact ggaattata gaacaaaca attatagcga  
7141 acaaatgat gtaaaaaatc ataaagaaa aattacatac ttaataagca gaagagaaac  
7201 tttagaaagt gacctaaaag gacatgaaga ggacacaaat gtgaaaaaat taaattgcga  
7261 tacattaagt gaagtaata ttggcattgc aagtgcacaaa gaagctataa gcaactcaga  
7321 ggaagtatt aagaattat taagaaaaat agaagaaaat gaaagattat gtaataataa  
7381 tgatgcaaa aattttattt cggatattat gcaaaatata gatgatctga ataaacgttt  
7441 cacaaaaaat ataccagaaa gagaaaaact ttttgaaata gaaaaggatt atatataatg  
7501 aaattaattc cttttcaat gaaataagaa cacttaacgt tgacgaattt gttgaaaaaa

7561 tgtataaaca aattgatagt gaaaaggaaa gcgtaaataa cataacagat actgataaga  
7621 taagtgttgc aattcaaaat gttacaaatt acgatgcaga aataaaaggc ttattgtcta  
7681 gaactattaa cgtattagaa agaataagta gaaggaaagc ggaaatggat actttattca  
7741 atagtctatc atcgaataat aaaaacctaa atgaaaatgc aaaaagatac atgaatgatt  
7801 cagctgaaat aattaatcaa ttaaatagcc atgttcaaaa aataacaaaa ctgaaaacat  
7861 atgcaaataa ggtaattgaa caattacaaa aagaactaac aagattatta gatcaacgta  
7921 aaattgaaat tccagttgat gatactcaaa cttctttaag taccgaggac gtaaaagaag  
7981 aaactgctaa tcagaaggag ctagaaactg ataagcagaa ggagctagaa aaagccatag  
8041 aaaaggaaca agaagaagct gtagaagggtg aactacaaaa aactatagaa gtggaaaaag  
8101 aatctgctat aaaagaggaa caagaaactc ctgagcagga ggaacgagaa acatctataa  
8161 atcaggaacc agaacatgtt acttatgaga cactaggata tgatacacca catgcccaag  
8221 aaaacgagag cgatggtact caacacgacg attcagaaag agatgataaa tcaaaggcaa  
8281 aagatgcaat ggaagaact cgtttggcag gagctattat tatcggttta tctttttttc  
8341 ccggagttct tgtattagca tttagggaca cgcaaacaga agaagaggaa agccatgaac  
8401 atgattatca tcaagcattt ggaggtactg atgattataa tatgcaagat aaagaagaag  
8461 ttatcgaagt ctgttttaat gaggatgatt aa

//



LOCUS Pvrpb2dtr 8080 bp mRNA linear INV 09-NOV-2015  
 DEFINITION Reticulocyte binding protein 2dtr cDNA, truncated pseudo gene.  
 ACCESSION Pvrpb2dtr  
 VERSION  
 KEYWORDS .  
 SOURCE Plasmodium vivax (malaria parasite P. vivax)  
 ORGANISM Plasmodium vivax  
 Eukaryota; Alveolata; Apicomplexa; Aconoidasida; Haemosporida;  
 Plasmodiidae; Plasmodium; Plasmodium (Plasmodium).

COMMENT

FEATURES Location/Qualifiers  
     source 1..8080  
           /organism="Plasmodium vivax"  
           /mol\_type="mRNA"  
           /db\_xref="taxon:5855"  
     misc\_feature 1..8080  
           /note="isolate VTTY57"

BASE COUNT 3844 a 939 c 1273 g 2024 t

ORIGIN

```

1 atggaaaaaa gagccttttg aatcatcttt tacaatttaa tatttatttt tttcggtaaa
61 attaaatcat ggcacacatac acgtaaattt atttgaatat gttcgcctcaa attattgtaa
121 ccctaaaccc tgaaccctaa accatatcat gctagtggtat attacttgaa tgaattgaaa
181 tactatgcaa cacattacaa tgaattgaag gttccttggtc aaaaagatgt cattcctcaa
241 gtaacacaca ttaccaatat tgttgagaaa aacgттаага tctgттгга gaaaacacat
301 gaattgaata cattaataac tcaattagaa aatccacaaa catataatat tcaaagaagc
361 cattatagta atagagtaaa agattaccgt aagaaaattg aggatattca aaattgttta
421 aaattaaatt ataaaagaaa tgttaaagct acagtatttg ccacaataat atggttccag
481 aactaatta aaatggaatg tagttggtgg accaaatcat gttcaacgag aatctattat
541 aatatgatta agatgtatac attaaaaatt aaggagtata aaatcaaaaa accaactgca
601 tatatggata aaataaaggc tgtttataag ttagctaattg atacaatatg gagaataaaa
661 gtagaattaa actcaaactt tgattcggat acaaccgact ttattctaga agaattttaa
721 tacattatag aaaagtataa tggtcacatt gataaaatta atttgggaac ttcttatata
781 gatcatattc atgaacaaga aggaactttg aataatacta aaatagaat tataactttg
841 tattctgtga tagctaactg ttacactgct tttaaattta gtttagaaca tataaatatg
901 tttgaaaata catccaaaag taaagaacag gtactttata actcttttag caaatttgag
961 gatagattac aaaagaaaat aaacgatctt attaattctg aattttctat atcaaccggt
1021 aactctgtca ttttgattc cgaaaaaat atacaattat cagaatcatt actcaactcg
1081 agttctaaag aaatagcaca acatgaaatt aaattaaatg cggaaattga aaagaaaaaa
1141 aaagattatg atcaaaaaat tataagagca agagaaacta taaaaaatc aaaggaatta
1201 attacatctg taaaaaacgc atttaagtta agtttagaag aaaaggaaaa gatagaaaag
1261 aaagtaacag aagcaaaaaa attgccaaac gctctagaaa gagacaaagc atatttagac
1321 attatgagtg aaataagaaa aattaaat aagttatctg ataattgctag aaagacaacc
1381 gaatttacta aaaaatcaaa tgcttttaaaa aaggaagttc aagaattaaa tacaagtgtt
1441 aacaactatg tgcaagcaat aaaggaacaa aaagaaaaag aaattcggaa taattctttg
1501 aaagatgaaa taaaaaagtt tttggaatat atacctaata acagagaaaa aataaaagaa
1561 ttaattacca aaaagaatga agtgcaacaa tatattccca aaattgaaga attaattaaa
1621 gacgcacact ttggtgtaga agaatttaca gccaaaaaaa cagaattgca aaatcaggta
1681 aattcaataa ttgatgcatt ttataaagaa gacctacaat tatttttaga caatttatca
1741 aactcttatg atgaaaatca agtttttagag aaggaagctg atactacaga aaagattgaa
1801 gaacttcaca aaagaaccaa aatggattat gaaaaacttc taaatatgaa atgtgatgat
1861 ataccgaaa taataaaaaa gttgaatata gaattaaata atctcaaaaa tttagaaaaa
1921 aatattgtag aagaacagac taaaaacatt aataaatatg tttcagattc atttgataac
1981 ctaactgatg aatgaaccg tttaagaaat agcttgaatg aatataagca ggatgaaggt
2041 aagctccaaa catataaagg tagtataaat gaagaaaaag acaaattcct caataactca
2101 agcgaaaaag aggaagatat tccagagga caaatattt atgatgaata taaaagtcac
  
```

2161 aaagatctta tggttaacaa agaacttaaa ttatccagtg atattaatga attcaaggaa  
2221 aatataaaaa aagtccaaac aaaaatagag gccttcagca gtgtaatgca aaaattagga  
2281 gcgaacgccg atgaacaaca tcaagaaact ataaattctt tgaagaactt taatactaaa  
2341 atcgaagggt taaaattaag tgaacttgaa ggtgaattta aaattaacaa tgaatcagct  
2401 gccaaattat ataatcaaat tgaaaataca atgaaaaata tagacacaat taaatcctta  
2461 aattatacta gaaacagcgc caacaatagc agagaattaa tggaaaaaat agtaaaagat  
2521 aaaaatgatt taataaaaaa actagatcaa cagtctgaag aaataaaaca atacacatta  
2581 atagaagaag aagaaaagtc accccttcta agcgctttaa atgaagaaca aatcatgta  
2641 gaaagtgaag ttcctaaaga gtcgatagac aaattaaaca cagaaataaa tgctatactg  
2701 gaatattaca acagttcaaa gggtaatttt aatgaggaca cggaaataaa attggaaaag  
2761 ttagacaatt ttaaaactca atgtgataat attaagcaat aatagaaac attaaacact  
2821 aatataaaag tgttagaaaa aaggatagac accctaattg atgaacaaca tgctaaaatt  
2881 gtgacgttga cagataagca cataacaacc aaagataata tgattaatca aaagattgaa  
2941 catagcacia aatcgctaga tgatatgaaa actaagttga atttctctca atttaacgat  
3001 gatatcagaa agaatgaaaa tgcgcgaaat caaggtaaaa tacaggaatt tgaaaaaatg  
3061 gttcaaacta tagaggaaaag tataaataaa aataaaacta aaatatatga aattaaagga  
3121 gtatacgatg tgtacaaggg tgaattcaat gaagaaaaaa ataaaagcac aaaaatcgta  
3181 gaaaaaaaaa atagcatgga aaaagtttat acaaaaatgg aagatactct taaaaataa  
3241 gaagatatag ataacgaaaa aaatatatta aatgaaatag aaaaggctga agtactatc  
3301 aggaaatggt tcattcataa tactgttcat atgatggata atgaaactaa aaagtctaaa  
3361 aatttgatgt accaaatcga tactgtctaaa aaagaaattg aggaaacaaa gaagcaaatg  
3421 cttgaatata aaaatgatga ggtatctaata tatgattata tgaaatatta caaccaggct  
3481 acagagagta atgctaaaat aaaagaaact tttaaaaatg ctacagatca gaaagaaaag  
3541 gctgaaaaata tcgaaaaagt aagtgaaatc gatgacatta aaaaccaagt taatcataat  
3601 ttacatcaga tccaatcaga aaatagttct atagaggaga tgttaaaaca aattaataat  
3661 atgaaagatt tattaaaaac gaacagttct aaaggaatat cggatacagt attaagtatg  
3721 accaaaaatg cagaagaatt tggcaaacaa gcaataagtg aatttaataa aacgaatgat  
3781 gtaatacaag caatcagaga tttgataact aaggctgaag cacataaaaa tttaatcaat  
3841 ataaatthag aagatgaaaa aataaatgcc gaagtgaag aaattgaaaa aattaaggaa  
3901 caaattgcc aataagaaaga agaaatagaa tcccatctga gcaaggcaaa agaattttaa  
3961 gaaaaatggt cctcagaaac aagtaacgcc aaaagaggta aaagtaaaat agaatttttg  
4021 caaagtcgtg aaggcagttc ggaagaggta gatatgaagg agatagaaga aatattacc  
4081 aaagcagaag gatattttaa tcaagccatt gctgcagaaa cagaagctaa taagaatgta  
4141 gaattgttcg gtgaacttca aaaaaatata tgtgacattt tcgatgaatc atcaatttta  
4201 ggaatagaga ctacatcaaa gaaaaaaatt aataaagcaa cagaaataat ggaagaaatt  
4261 aaaaggaaaa attttgaaat tcaaggcgag gtgaaaattt tccatgaaac actcgttaa  
4321 ttgaaagaaa cacaccctga taacaacgta gatgctgaac ttaacaatgc gaaatcgacc  
4381 aatgcaaatg tacttatata aactaaccta gaaatggtgg aacataactt atccgtaata  
4441 gctaaaatta aacaggaggg agaaaatata tataatagag cctcatctac gataaattcc  
4501 atgacagaaa tctccaaaaa tactgaaaaa aaacattag acaaggcaaa aagtgcgaa  
4561 tctaaatata tatectattt aacaaaaata acttcagaaa gaaatcfaat cattgaagaa  
4621 aggaataaac taaatggtat aagcccaat ataataagta tagaaaagga attgataaaa  
4681 gccagaaaag attacgaaat tggacttttg caaaagatag atgaaatagg caaaaacaga  
4741 aaaaaaaaaa ttgatttgac aaaagaatca ataaaattaa cattgagcaa cttttcttcc  
4801 catttcaaag gatttgattt aaaggaatat gtctttaata aaaatataaa tgactatgaa  
4861 caaaagatga aagaaatata tgacaaatat gacaaatcga taaataaaat tagtaaaaac  
4921 ttgaaaaagg ctgaagagga taatacaaac tataccctag cgaatgagct gaggaagaa  
4981 gcgcaacaag aaaaagcaga acttacaaat atacaagaag aagtaataaa atatttaagg  
5041 gatataaaaa aatgggaatc attcagattt atacttgata tgaaagacaa ttaagtaat  
5101 ataaatacac agattaaaca agaagaatta aaggttaatg atggatatga atacattaaa  
5161 caattagttg acaatattaa agagtcaaat gatgaaagca gtatatcaga taacttaca  
5221 aaaggaaaag aaaaaaatgt agaaatacag acaaaaatgc aatctacgta taaaacaag  
5281 gcaaaagtta ttttaggaca tataattgac tccgcaaaat ttatagatat taatataatt  
5341 acaaaatcac cactaaacga attgtcttca gaatcacatt tgatgaatgc aggagaatta  
5401 aaatttcagc aagaaaataa agtaacatta gaaacagaac atatgacaaa caataagagc

5461 gaattagatg tttataaaaa tatacgcgat gcttacaaca tcgttgtgga gataattgca  
5521 tattcagata aaatagacac aaaacaaaga caaagtacac aattattgga tgatggaaat  
5581 gatataatc ttacgctaaa gtcaataaac gagctaaaaa ataaaaataa ctctgtaaaa  
5641 agtaaagaaa atgctatttc aggcaaaata gataatattt caacaaaact taatgagtta  
5701 aacaaaatta catgtgatga taaaagttac gataatattt tagacataat aaaacataca  
5761 gaattaaaaa ctatacgtga ttctttttaa caagaaaaaa ttaacaaaaa gagcgtattct  
5821 aaattggaaa aaataaagga agaatttgaa aattcaaaaa atacatataa aaatatagaa  
5881 gaagaagtta atgctctaaa ggctagtttg gtaaaacatg ataataataa aagcagaaac  
5941 aagccaattg atgatgtgct aatcgaataa gaaaaaacag aaaaaggtat agatagtttt  
6001 agtgcctccc ttgatgagat gttgaagaaa ggaagagaat gcgaaatatt taggtataca  
6061 tccataaaaag atggtgttat cgcaaaaata aatgatgacg cagaattaat cgataatata  
6121 cacaataata ctaatgaata tttgacatat gttcaaaaaa attatagtga aacagcagag  
6181 gatgttcgca cattaatca acatttcatg acagaaacga taagcgatca tgcgccaact  
6241 aattacgaaa catcaaataa atcttatgaa gagataactg aagctgttaa taattccaaa  
6301 gcaataatag ataataataa aaattcaatt atacaagtta acgaaaaaac ggaaattagt  
6361 tcttttagaaa atagcgcaga aaaaatagaa aagctttata aagaattaca ggataaaaaa  
6421 aacaccataa acgaaattta taaaaaggct aacatagtta aattgcaaga aataaaatca  
6481 gatgctgata aatattttgga tgtagctaac atattttaata atgtattgga cgggtcaaaaa  
6541 tcaagaataa taaataacct aggtaaaata gcccaagtta aagaaacaat aacggttgga  
6601 ctgaagaata tggttgagac tgacaataca tttacgacag agtctattaa caggtttggga  
6661 gaaatttata atgacattaa gactagtata gatgaactgg aaattataga acaacaatca  
6721 tatagcgaac aaaatgatgt aaaaaatcat aaagaaaaaa ttacatactt aataagcaga  
6781 agagaaactt tagaaagtga cctaaaagga catgaagagg acacaaatgt gaaaaaatta  
6841 aatgcgaata cattaagtga agtaaatatt ggcattgcaa gtgcaaaaaga agctataagc  
6901 aactcagagg aagtatttaa gaaattatta agaaaaatag aagaaaatga aagattatgt  
6961 aataataatg atgcaaagaa ttttatttcg gatattatgc aaaaatagaa tgatctgaat  
7021 aaacgtttca caaaaaatat accagaaaga gaaaaacttt ttgaaataga aaaggattat  
7081 atataatgaa attaattcca ttttcaatga aataagaaca cttaacgttg acgaatttgt  
7141 tgaaaaaatg tataaacaaa ttgatagtga aaaggaaagc gtaaataaca taacagatac  
7201 tgataagata agtggttcaa ttcaaatgt tacaattac gatgcagaaa taaaaggcct  
7261 attgtctaga actattaacg tattagaag aataagtaga aggaaagcgg aaatggatac  
7321 tttattcaat agtctatcat cgaataataa aaacctaata gaaaatgcaa aaagatacat  
7381 gaatgattca gctgaaataa ttaatcaatt aatagccat gttcaaaaaa taacaaaact  
7441 gaaaacatat gcaaatgagg taattgaaca attacaaaaa gaactaaca gattattaga  
7501 tcaacgtaaa attgaaattc cagttgatga tactcaaaact tctttaagta ccgaggacgt  
7561 aaaagaagaa actgctaact agaaggagct agaactgat aagcagaagg agctagaaaa  
7621 agccatagaa aaggaacaag aagaagctgt agaaggtgaa ctacaaaaaa ctatagaagt  
7681 ggaaaaagaa tctgctataa aagaggaaca agaaactcct gagcaggagg aacgagaaac  
7741 atctataaat caggaaccag aacatgttac ttatgagaca ctaggatatg atacaccaca  
7801 tgcccaagaa aacgagagcg atggtactca acacgacgat tcagaaagag atgataaatc  
7861 aaaggcaaaa gatgcaatgg gaagaactcg tttggcagga gctattatta tcggtttatc  
7921 tttttttccc ggagttcttg tattagcatt tagggacacg caaacagaag aagaggaaag  
7981 ccatgaacat gattatcatc aagcatttgg aggtactgat gattataata tgcaagataa  
8041 agaagaagtt atcgaagtct gttttaatga ggatgattaa

//

LOCUS Pvrpb2e 8200 bp mRNA linear INV 09-NOV-2015  
 DEFINITION Reticulocyte binding protein 2e cDNA, pseudo gene.

ACCESSION Pvrpb2e

VERSION

KEYWORDS .

SOURCE Plasmodium vivax (malaria parasite P. vivax)

ORGANISM Plasmodium vivax

Eukaryota; Alveolata; Apicomplexa; Aconoidasida; Haemosporida;  
 Plasmodiidae; Plasmodium; Plasmodium (Plasmodium).

COMMENT

FEATURES Location/Qualifiers  
 source 1..8200  
 /organism="Plasmodium vivax"  
 /mol\_type="mRNA"  
 /db\_xref="taxon:5855"  
 misc\_feature 1..8200  
 /note="isolate VTTY57"

BASE COUNT 3724 a 1203 c 1380 g 1892 t 1 others

ORIGIN

```

1 atggaaaaga acctatTTTT tgtgatcttt tgtaacctct tgtttattct ttccgcagta
61 tgtaaagaca ataacaaaaa ccaacctaac aggctcaaaa gggatttcaa gctatcacca
121 atacatgccca cttccttggg aagtgaccag ttcgaacatg gcagtgaagc aaaggggaac
181 gaacaaaata atcgtaacag tgacaatgat tacagtaatg agcaccctaa tgatgataac
241 aaaataagag gagaaaacgt aaacacgact cacttacgaa ataattcatc ctttatatcc
301 ttaaaaaatt ataaaattgc aagaaaacca tctcgctatt catacctaga taaggacaac
361 acatatgcag ttactaccaa aaataatgat aaaaaaaact tacagaaaga gattaatact
421 attccaagta cattcataca aaaaactcat tatgaacccc agagagtggag tgattcatgc
481 gattaatctg gattatgttt gtatctacgg tgaccataaa agtataatTT ctttattgta
541 tccatataat cctgaaatTT atgcttttag agaactgaga agttatgcac tacttgacga
601 agaaatgaag agagcaatcg acgaaacgta taatgtcgaa atacctcgca ttgaaaacat
661 tgtgtctcaa agtttgaatg aatgctcaga tcaataaaga caattgaata cattaatata
721 tcatctagaa aatccagaag gacatggaat tcaagaacgt gtatacggta ctaagaagca
781 agagtacaaa aacagacttc aatctttaca tcaatgcata aaagaaaaat ataagaaaaa
841 tgagaaagaa attttactaa gacaaatatac tacgaaacta taaaggatat atcgtgcaac
901 tggatacact tgtgttcaac agatatatat tataatatga ttaagatagc tgagataaat
961 gttaaagaat atgacgtag atcaattact tcatacttta atgcaactaa gaaaatacat
1021 aggtctgggtg aagatacaat aaagagagta aaaaaacagt taaataatag tcttgcctat
1081 gaaacagtag aatttatatt agaagaaatt aaatatatta cagaaaaaat gagtcaacac
1141 ttagaaaaag ttaagcaaga aactgaaact ataaataagc tttctaaca agaagtctgg
1201 tcccacttct ttcgatttaa tcttcaaagg gaattattct ttttagccta cagctattcc
1261 agttttaaat ttagtactga caatttaaga gtcttgaaaa atgtgtccga gagcaaaaca
1321 ggaaaacttt atcaatattt tgcaaaaattc gagggcagtc tcaaccacat aataaatact
1381 cttatgtcct ctaaattatc cacgtcaagt attaattctg ttctctcgga ttctgaggaa
1441 attttaaaat ctgtagaaac attacgcagt tctacgtccg agcagataaa agaacatgta
1501 ctttattcga atgccc aaat agaagaggct aagaaaatTT tagatgaaaa aatgcttaaa
1561 ttagaagaat atgcacaaga aacaaaaggg gtaattaaaa cagtaaataa aacatttaaa
1621 ttaaataata tagcaagtga agaaatagaa aagaaaagac gcgaaactaa caaaaacaaa
1681 acttctctag aaaaatgtaa gatattcgta gaagttatag acttaataaa atcaataaaa
1741 tataaggcaa cccaaaataa taaaaaataa gaggaacttt caaacagat tatcactata
1801 aaaagcaatt ttcaacaatc agagacagct attaacgaag atgtgcaaaa aattaagaa
1861 ttaattgaaa atgaaaaaaa acgtcgttcc atgaaagatg aaataaaaaa acatttgaaa
1921 tattttcctg agacggtgga taacataaaa aaaatcattt cccaaagggg agaaatagaa
1981 aatatattc taagcattga aaatttgatt aaagacgcgc cctctgctgt ggacgaatTT
2041 acaactgaaa aaacggaatt gcaagacaaa gcaaaatcaa tcgttgattc attttataag
2101 gaaaatttac aaacatttgt agacgattta gcagaatTT atacaaaaca tcaagcctta

```

2161 gacaaggaag aaaataactaa agaagaaact gaagcattgt acgaaaaaac gaaagaaaaa  
2221 tatcaacagc ttgtagatat gaagtgcgat ggtataccag aaatgttaaa caatlttgagt  
2281 gaagtgttaa atagtctcac acagctaaag aacaaaatta tagaggggaa tattcaaaat  
2341 atcaaaaaag atgtgtcaag ttcgttaaag aatctaactg aagaaacaga ccgattaaaa  
2401 aatagcctga aggactacga gcaaagtgca gataaactga aaacctacat aatagcata  
2461 aacgggataa aagacaaagt tcgaactact ttaatcgaaa aagatgaaga cattccagaa  
2521 ttaaaaacta cctatgaaga atatacaaaag caaaagggcg aaggtractaa taaggaaagc  
2581 acagtaacac acgatattga cgtactcaaa gaaaatataa gaaaggctaa cgaacaaatt  
2641 taaacttaca aaaacgtaat gcaaagatta gaaacacaga atagtggagac atatcaggaa  
2701 actaaaactt tgttagaagg ttttaacact aaaatcgaaa gtttagaatt tgaaaaactt  
2761 caagatgaat taaggagtca caaagaatcc gctagtagta ccataaacca aatagaaaat  
2821 acaaaaaaag ttatagacac gctgaagtct ttaaatactc tcacaaagaa ctccaacaca  
2881 aacgaacaat cगतcगcaaa aataaaaagag agaaagaatg atttagtaaa aaaaatagat  
2941 aacatattg aagcattaaa tagttacaac atagtagaag ataaagaaag aacatccctt  
3001 ttgaacactt taaatgaaga aaaaaataat gtagaaagtg aaatacctga aacatcaata  
3061 tctaaattgc aagtagatgt aaaagcttca caagattact gtaaaaatga aaagatcaat  
3121 atcgacaaag gcatggaaac caattcgga gaactgggaa aatataaaac tgagtgccat  
3181 aacacagaac tggaaataaa caaattaaac gccaatgtgc aagcattaga aaaaaaata  
3241 gaagagttgg tacaagatca acatggccaa attataatat ttggtgataa acttataaca  
3301 acgagggaca cgcagataaa tggaaaatc gagctgaacc taaattctct aaggatattg  
3361 aaaacaaaat tagacgcttt taatlttgaa gaagctgtta acaataacg gaaactgact  
3421 gttcaaaagca aaataagtgc ttttaagaa aaagtgaaaa gtacattgca aatatagaa  
3481 aatgaaatcg gcaaatttaa cggaaattaaa cagaactacg atgcatatat ggaacattc  
3541 aacaaaggaa aagatcagat caccgaattc aaagataaaa aagagaacat ggaaaaaatt  
3601 tataaacaaa tgaagaaac cacactcaac aaattagaag aggcagaaaa agaaagtagt  
3661 atattaaacc aagtaaaaca aatcgaaattg gaatacagaa gaattttaat tcatcatgct  
3721 gttcacatga tcgatcagga aaacacaaaa gctaaatcgg ttatggcgga tatcgaaaca  
3781 tctaaaagca aaattgatga aataaaactt caaactgaag aatacaaca gaagaatatg  
3841 actaatlttg aatatgaaaa tcattacagc aaggctaaac agagcaacac caaaataaat  
3901 gaatlttcta tagacgccac aagcgataag gaaaaggctg acaaaagcga agatgtaaac  
3961 gaaatagaac gtatcaaaga aaaaattaa gacaatctgc aaaaagtcaa agaagaatat  
4021 acttctatgg aggaaataaa aaaacaaatg aatagtatga aagatttact agctlttgaac  
4081 aattctgaaa cgactgctac aaacatatta gataacacaa aaaacgcatt aggtlttagc  
4141 gaggaggcgg caaaggaact tgagaaatca aaacaattat tagaagaagc ggtagctcag  
4201 atagctaagg caggggaaca taaaggtaaa attgagatag ccttagaaga tgaacaaata  
4261 aatgccacg taaaccagat tgaactaata aagaatgaaa ttgtgaataa aaaaaagaa  
4321 atggagtcct atttaagcaa gataaaagaa tataaagaga aatgcaccac ccaagtcaac  
4381 aattcgaaata gaggaaaaga taaaattgaa ttcttgaaaa cggttaagca cagcgtagaa  
4441 agtagttcga ataaggttga catggatcag ataaatgaaa gtatagaaaa atccgaacaa  
4501 tattttaaagg atgtagaagc tctggagaca caagctgata acaatctaaa gtcatacata  
4561 caacatgaac aaacgatcaa tgatactttc cagcaatctg aaattctagg aatagaaact  
4621 aatcaaaaa agaagttcaa cgaagcaaca gcactaatgg aagaaattaa aaaacaaaat  
4681 tctgaaattc aaacaaagg gaatgatttc caagtaaaac tgaacaaatt aaaggaacc  
4741 caaaatgccg aagacgtaga agaggagctt aataatgaaa agtcttccaa tgcaaaagca  
4801 cttatacaca cgaacctaga aagagtgcaa tctaatttaa cccaagttgc caatattaag  
4861 caggaagtgg atggcatatt taagagagtc acagacacga tgaattccgc aacagaaacc  
4921 tctcaaaata aagatggcaa aacattaggc acggtgaaaa gggacgaacc taaatatgaa  
4981 gagtacttaa cccaataac tgcagataaa aatctaattg gaaaggaaat tgaatgaaat  
5041 aacggaataa gttccactat cgaaatctta gaaaaggaaat tgaatgaaat cagaatgaaat  
5101 tacgaaattg gactcctgca aaagatgat gaagtaggca aaagtaagaa gacaaatatt  
5161 gatttaaaaa aagagttaat aagttcaacg ctgaattcct tttcttccct gttcaatggt  
5221 ctcgatttaa atcaatacga atttaagaaa aacatagatg gttacgaaca gaagatgaaa  
5281 gaaatacaag gcaaatttga cgtatcgctg aacaaaattg gtgaacattt aaaaaaggct  
5341 tcagaggagg gcgcaaat taacctagcg aataaaactca gacgagaagc tcaacaggaa  
5401 aaagccaaac ttacaagtag cgaagatgaa gcaagcaaat acatagaaga tattaaaaaag

5461 gtagaatcca taagatttat aatcacatg aaagaaaatt tagacaaaat aagcacatcg  
5521 atcaaagaag aaaaattaaa aattaatgaa ggacatgaat tcatcaaaca gatagttgaa  
5581 ggcattaata acacagatga tgaacgcgat gtatcaaaca aattacaaca ggcggaagga  
5641 aaaaatgaag aatgcagaa aataatgcac tctaagcata aaaacgaggc aaaagaaatg  
5701 ctaggacata tagctacctc tgcaaatttt ataaatatta aaataattcc agaattaact  
5761 ctaaccgagt caaacgtaaa cgaagcagta gaactaaaat ttcaaccgga tggcaaagta  
5821 accttaaaaa caagaacat ctcgaaaagc gaagccgaat tggatgtgca taaaaatata  
5881 aaggaagctt accatctcgc tttggagata caaaaatag caaacgaaat agacgcacaa  
5941 caaacgaata acacacagtt aatggtcaca gtaaaccgacc tacatcataa aattaagttc  
6001 ataaatgaat taaaaataa agtaaaaatt gaaaagagta atgaaaattc cctatcgggt  
6061 aaagtaatgg gcatttctaa caaaattgcc gaattagaca aacattcatg cagtgaaaaa  
6121 agttatgata aatTTTTTgaga aaacacgaag aaaacagatc taaaaatat acgtgattcc  
6181 tttaatcaag aaaagagaaa cgcaaatatt gacttgaatt tgaaaaatat aaaagaagat  
6241 tttgccatt cacaacatc cttaaaaatt gttgaacagg aaattgaagc tttaaaggca  
6301 aatgaaatca aactgaaaa tctgcaaggc aaatctactc agatagaaac actacataac  
6361 aaaataggaa gcatagaaca aaatattgca agtctaaata cgtctttgga caaattacta  
6421 aacagtggaa aaaaatgcga aatagctaga tacacatcct tgagggatag tattaagggt  
6481 aaaataaatg cagatgaaga aacaatcgat aatctgcaga agcatgttag tcaatatttg  
6541 acatagtgtg aagataacta taatgccaca gtgaaggacg tccttacatt aaatgaacat  
6601 ttnagcaaca aatgggtgac tgatcatgct gcgactaatt ttgaaaaatc aaataaaaact  
6661 tcggaagaat tatccacagc ggtcaatcaa tcaaaggcca taataaacga tataaaaaat  
6721 gccttcatag aagttaacga aaaaacgcaa tttactttgt tagaaaacag cgcacaagca  
6781 atagaaaagc tttacaatac attacatgaa aaaaaaac gcagtggacg aaatttacia  
6841 aacatccatt ttagttaaat cgcaaaaaat gaaatcaaat gctgataaat ataccgatat  
6901 ggctaaaaata tttgaaaacg tgttagacac caaaaaatcg agaattacia gtaaccagag  
6961 tagcgtatcc cacgttaaag atatgataaa cgtacagctt aagaagttag aagctacgga  
7021 cagcgcattt aaattagaat ccataaataa gtttcacgaa ttaagcgata acatcaaaaa  
7081 gagtatagat gaattggaaa agctagaaca agttaatcgc caagaacata atactgtgga  
7141 aacgcataaa gaacgaatta cacatttaat gaacagaaga gacagcctca aaaatggagt  
7201 gaaagaatac ggagaagatg caaatTTTaaa aaaattaaga ggggatatcc taaaccaggt  
7261 aattagtgac ataagaaata ttaatggaga acttaacaac tcagatcagc tgtacgtcaa  
7321 attaatgaaa aaagtggacg aaaataatga tttgtgtaaa aagaactata cagaaaatta  
7381 cgtttctgaa gtactgcaaa aaatcgataa tctgaataaa cgcttcaaac aaaatTTTacc  
7441 agaaaagaaa aaagttttac aaattgagaa caactTTTaat gaaatTaaa ccctattTgg  
7501 tgaaataaaa accttttata aggtagaaga atttgtaacg aacatgtata gtcaagttaa  
7561 tggtgaaaag gaacgcgtaa aagatcagac aaatattgaa aaaataaaaat tggcaataca  
7621 aatattaca aataacaatg aagaagtaa aacctattta tccaaattta ttagcaccct  
7681 agaaagaatg aatatcatga aaaaagaaat ggacgattta tccagctcac tgcccacaca  
7741 taatacaaat gcaacagaaa atgcaaaaac gtttgtaaac agttcggtag aatcattaa  
7801 tgagctaact agctatattt ctaaaataac cgaactaaag aattatgctg aaggtgtgat  
7861 aaccgaatta gaagaagcat ctaagttaat acgccagct gctaatgact caaatgagac  
7921 gcaaatggtg ccaaccgaag ctgatagcac acatcaagac gattcacaga gtgataatcg  
7981 ttcaagggca agagatgcag atggaagaac tcgttatgca gcagctatta ttggtttTgc  
8041 tcttattacc ggagttgccc tattaagccg caggcataat cctgatgaag aagaggatca  
8101 tcatgaacac ggctatcatg aggcatTTTga gggcaacgac gactacactg tgcacgataa  
8161 ggaagaagtc atcgaagtct gtttcaatga cagtgattag

//

LOCUS Pvrpb3 8423 bp mRNA linear INV 09-NOV-2015  
 DEFINITION Reticulocyte binding protein 3 cDNA, pseudo gene.  
 ACCESSION Pvrpb3

VERSION  
 KEYWORDS .

SOURCE Plasmodium vivax (malaria parasite P. vivax)  
 ORGANISM Plasmodium vivax  
 Eukaryota; Alveolata; Apicomplexa; Aconoidasida; Haemosporida;  
 Plasmodiidae; Plasmodium; Plasmodium (Plasmodium).

COMMENT

FEATURES Location/Qualifiers  
 source 1..8423  
 /organism="Plasmodium vivax"  
 /mol\_type="mRNA"  
 /db\_xref="taxon:5855"  
 misc\_feature 1..403  
 /note="isolate VTTY49"  
 misc\_feature 404..8423  
 /note="isolate VTTY57"

BASE COUNT 3548 a 1101 c 1765 g 2008 t 1 others

ORIGIN

```

1 atgaagaaaa acggatggtg gggagtatgc ttcgggggtc ttctctttct tatcgctggg
61 gaaatgccat aaacgaatcg aataaacaca aaaaggagga aacgacttct tctgttaatt
121 cgtattgggg tagacaacat gagtcagaat accctggaag gaagaagaaa aattttaaaa
181 aaaatagctt gtccccagga gaggagggat gtaggaatga ttgccccccc agcggtagtg
241 atggaaacga atcagggtta tttaagaaga aagcacttat acatttaaga gatagcaaat
301 ttagaaggaa gccatcgcgg tatgctgata ttaaaagaaa cggtgagaac aatttggata
361 gacttccgag tagcactgag aaggaggaaa ataatgaccg taatggaggt gccagttcct
421 ttttacaaaa tttgaacggt cccaatgtag acgagatfff agattatttc gagattgtag
481 gtgaacaggg agagttagtc ttttcattag aatcatacta tgtggagatc tacacgtgca
541 aagaaattgt gcgttttata aaccgccaag cgттаacca ctttagcggg aactatgggg
601 atgatgatgg tgaggaggaa gaagaagatg aggatagtga ctacaattct gggttaagaa
661 aagattccag gatacaaaat ctgtatcatc atatgaaact ctccatgatt tcttgcattt
721 ctgaaaaggt gaagctacta aacgaaataa atagtttgga atacccccag gcagaggata
781 gtgaagagga ctcaagagca gagaattcta ccacatacaa attactcata aatgagtatg
841 tagattgctt aaagaagtat agcgaaaatg ttaaagggaa gatagcggat gctaagaaaa
901 gcatcgaaac agaatatgga aataaatttt gtcctaataa gtgcaattcg aatgtgtatt
961 ttgaaagtgt acatttgtac ctctcatatg tcaataataa tgcagacatt ttgtacaatt
1021 ctaacattag cgatgcgaag gaatttttaa aatctgggac aagcattggt agcattatag
1081 agaaagaaat aggtttaaag catgtcataa gttctataaa gttcctgcaa agtgaataaa
1141 ataacatcat aaataactac aattatcaca taaagaatat aaaaactgct atcgataata
1201 taaaggagca tgaaaaaaat gataactcta tcgtgtttga taaaaaaagc ttggtggaga
1261 aaagtttcga cttggcaaaa aacatgtccg tttacaaatt taacaatgag atgttcaata
1321 gaatgaaagt attgtacgat ttgaagagaa ctaaatttaa aaaactatft attttcttag
1381 cagaggagtt agagaataag cttaactcct ttgcagagtc cgcggaattt cagaaaacgt
1441 atgactcgat aattaacgac tggaaattta tcttggcata cgcgaaagat gtatataata
1501 aaaatttgac caagataaaa aattacgaag ggaatgaaag tttagaagtt atcatagtca
1561 gaaataaggt gaaggaaaag ctagcaacgt tggaaaggtc ggtagacaag tttagaggacc
1621 tatttaatat catcaaatcg aagtatgtaa tttatcatgtc agcgaatcgc ctctattggg
1681 aactgaaggg ggaattcaaa actggagaaa atgtcgagca gaaatttgat gacctcataa
1741 gattaatgga aacgataaag acgaaaatta acacgatgaa tgaaggtatc gatactgtaa
1801 ataagaccta ctccagcatt aagtatgtac aaatacaaat cgaaaactta agcacttcta
1861 tcgatgggta catgaacgaa atagatgcct taaaagctaa ggggtcaacg aatgatcata
1921 ttagagaaga aatgggtgtcc aaaatggtgt tcattacgga aaatatcaac aatttgaaaa
1981 aaattttttc cctggaggag aaggcaaacg aaaatattgc gcaaattgat gaattaatta

```

2041 tgggaacatc gttagatatg aacgaaatta tagataaaaa aagtgacgcg tataataaaa  
2101 taaaaatgat tattaagat gtttatgaag gcaatttgaa ggactttcta gacgaactgt  
2161 ctcttaatgt agacaagaat agaaattcca tcaaccaaag tagttctacg aacgaactgg  
2221 atggcgtggt aaataatata aaaggtgatt atgagaaaat gaaatctatc aaatgtgata  
2281 atatatcaga atctttgcag aacataacga atgaactcaa aattatttca gacgccaaag  
2341 aggaaatfff aaaaatccaa ttcggagata tcaatgaaaa attaacaac tcggttagagc  
2401 aacttcagag tgtctacgac aaattacaag ttagcacaac agagtataca gcgggaaagg  
2461 ggaagattga ggaatacaaa acggttatac taaaggggga aaaagaatff tttgacaaag  
2521 cgtatgataa ggatgaagat atggttagaag tgaagatgc ttacgcaaat tttctcaaac  
2581 ataaggataa tctcctcaag aacagaagta aagtgtttga agaattccat atggcgaaag  
2641 aggccctaaa aacggctagg atttacctcc tatcttatgt agatgtgccg gaaaaatata  
2701 acattatcaa gggggaaaca aatcaaaaat ataaaaagat aatacaagaa attaatgaca  
2761 aagatgtcga tatcaaattg gaagaatagc aagcagactt caacagggac aaccaattat  
2821 ccgatagcat cataaaggaa gtggaccaat caaataaaaa tttgtctaac ctgaaaatff  
2881 taaacaagtc tattaagat tgctccacgg atagcaacat tatcgaagaa ttaattagca  
2941 aaaataatfc tctgaaggaa aaaattatff ccgaaaggaa agaaatagaa gaagataatt  
3001 tcatggaaca acatgtgaag ataaatffaa aatcaaatt gaacgatgct cgtattactc  
3061 ttgaaaacaa attgtatgac aacaatffga cgaactffaa gacacaaat aagaatattc  
3121 tcgattffca cacaagffcg aaggaaaaat ataaagatff gaacgaaaca gacctgaaga  
3181 aataaaaaa aaatgaagag tggaaaagcg ctaaggatff gatatacgtc cttatgtcg  
3241 aatacgaat attgaagaag caagcggatg gtctgatcag cagcaaaaat agtgaaatta  
3301 taaaatggat aggcaacaga atagtggaaa agaataaaga aataaatgaa aaagtggatg  
3361 aacatgtaaa ttcgffcgat gaaatfftg taaaatctaa gtcgccagff tttgtcagag  
3421 atgfftaatca ctacaaaaat ggtgagaata aagaaaaggc aagacagff aatgcagaag  
3481 tggaaagctc cgtfcggaag atcgaaaacag aaaaggaaaa gfftaacaaa attaaaacaa  
3541 attctaatga atactffgta caagcaaatc gaaagaaaag cgaaaatgta gattffcaagg  
3601 ccaaggaaaa ggccatgaaa gaagtgtacg aacaaatffag aagcgcacfa gaagaactga  
3661 ataactcact gaaggaaatt cccacactga atgattffca gaagatagaa ttaaaatffg  
3721 aaaaaaacga aatfcacgat atggffaatc agattaccac tgagcagaaa aagtgtgagc  
3781 aggaaatggc agaaatcaat tctffgtaaac atgatataga tgaaatgaag agggcaaacff  
3841 cgggagaaga gactcccgat tccctffat ttgtatatac cgaatfftac gaaaaagcgg  
3901 taagcagfca tgggactatc aaagcccgff ttaacgaggc taccgggcta aatgggaagff  
3961 gtgagagtag cgaaaatatt aacgaaataa agggaaatgaa aaagcagatff gatggffatff  
4021 tgagagaaat tffaacaaat tatggcacct tgcatgaagc gffggcgat attaaaaaata  
4081 tgaaggaaat gctgatggat gffgatgffc aagaaatffg gcgctgffg gagaaggatg  
4141 agacagaagc gcagaaatat gccacgffg tgaaaagfga gcaggcaaaa tcagatgcc  
4201 taatffaaaga attagataaa cattfcacag aagcaacgag gctaaaaacg gaaatgaata  
4261 aaaatffatc catccaaaga atcgatgaaa ttgtcaatga aatfatgaaa tataaggacg  
4321 aaatagcaca ccggaaagaa gaaatgaaca atffatffgaa gaactccaag gagtataagg  
4381 ataaggctff tctgcattac cgtaacgcag acaggagaaa gaaaaagcfa caacatffga  
4441 aggaaaaggg ggaagaatct gaaccgcaga ttgatatgga taaagfagff tffagatgtaa  
4501 accaatgfat gactcaatca aatgccgctc cagcagatgga agaagaaata aaaaagcagc  
4561 gtaatagcfa cgcagaatat gaaggaaaaa tgaatactct cffaaatgac atffccgff  
4621 tgcaaaatag gaccaagfat gcaaaaggff aggaccaggc caccagcact atgagagaaa  
4681 tfgaacaatt gcatgcaggc atccnagaaa aactffaaaga atctgaaaga aaatffagaaa  
4741 tgtggaagag gaaatcccaa atgaatgaaa gaacagatat atffgaaat gacaaatcga  
4801 agacggcata cataaacgfg aaatffaaat tagaattagff cgagffcaat ttaggccaga  
4861 taaaaagffff gaaagaaagff gffgaaataa tffctatccaa atcgaactaat tffaatagff  
4921 ccatactagg ggcgataaaa atffgaaagff atgactcctt agatgffgctg aaaaaggfag  
4981 aatgacatta catgcagfat tffgaaaata tffgaaaatgga gaaaaagcfc atgacggaag  
5041 agaagagcfa catggatgfg atacacgfaa atgffcctffaa aatagaaat gagatggaga  
5101 aatgtaaaaa aaatfcagaa gagagcattff tgaaaaaagc caaagaaacg gctgataaga  
5161 agaaacaact tattgaggca actagggagff cgctaaactc cctggagcca tactffaccg  
5221 agatgffffaa tgaatcatat tffgaaagat acaacatffaa ggaaaaatff gfcgffatc  
5281 aaaagagcfa gaaaggffta tatgacgaat tffgffgagfc ctacaaagfa atcgaaacga



5341 acgctgcaaa ggttgacagag ggcacggtaa agtatgatga agcgagaaga ctgagggagg  
5401 aagctcaaaa ggcagaaata aatattaaca ataaggaaga agctgcaaaa acaaatttga  
5461 acaaaataaaa gcagcatgaa tttatgaact ttctatttca tacaaggaa catgtggata  
5521 atattaagaa agcgtgtgaa caagaaaata ccaaaatgga cgaaggacat acccatatta  
5581 agcaaatcat tataaacatt cgaaagttaa cagaccagaa gagcacttct gaaacgtaa  
5641 aatggcaaaa ggagaaaaat aacgaaataa aaaagaacgc acagcagtgt aataaaaatg  
5701 aggcacatag cgcctttggg aagatgataa aagcgtctaa ttttatgggg ataaaaatat  
5761 taacaaactt aggatccgag ttgagccccg aaatgcacct agaaactact tcacgaacta  
5821 attcagagtt aaaatttgaa tcggagggtgg aaataaagtc ggaaagtgtat gccaaattag  
5881 atgcctacaa aatctacaa gtggcctatg gatataattca aaaaatattt aaagattcgg  
5941 aggagacaga gaggaacaa gaagaaatcg aagggtggat aaggaaaggg aacaataaat  
6001 gtcacgatata taaatcatct aatgaattaa aaactaaatt gaagtacacg aagtataagg  
6061 gaaacattac ttaactaaa attaatgacg ctttgacca gtctgcccaa ttgaaagcga  
6121 tgacttgacg tattgtgaac gatagcaaaa ttatggagag ctcagaatat acaaaattga  
6181 aggagatgag tgatacgtac aatcggaaga agaaggaaga agtatccgag acggaggctg  
6241 acggaataaaa tgaagaattc caagggatta tgaaaaatat agaaagtta gaaaagcaat  
6301 ttgaagcagt acaggaacaa gaatcaccca gcgaaatgat tatcgtggaa aactccctag  
6361 ttacagaaat taataaaaaa atagacagca taaatagcag aattacaacg attatgacta  
6421 gtcttaacga gttgctagta acaggaaggg catgtgagaa atcgtcttat gcttccctaa  
6481 ttggtaatat aaatgcgaaa acgtcaagtg acttatgaat aatcagtaac caaaaggaaa  
6541 acgcggaaaa gtacgtagaa tacattaaga aaaattcaaa cttgataaat gatgacattc  
6601 gtgcattaaa taaatacttt gatactaata ggataaataa ttaccagttg aaaaatttgg  
6661 aagaagtaat taaacacgct aatgatttta acgtaaagga aaaagaagca acgggaatag  
6721 ttaacgaaat taaaaaagaa ttcttagacc taagtcggga ggtagaaatg aatttcttaa  
6781 atagcagcaa agaaaaaatt atggaacatt acaaaaatct gaaagataaa ataaagagca  
6841 ttaacgaagt ttataaaaat atcaacttgg taaaattgaa agaaatggaa agtagctcag  
6901 ataagtactt agaaatagca gggaaattta aaaatgtgct agatactcaa ataacaaggc  
6961 tgttggataa tcatatggtg ctacaagata tcgaaaaaaa tataacagaa aatgaagggg  
7021 aactgaaagg tattagtaat acatacacac tacagtccat ccaaaagttt aacaatgtgt  
7081 gtaagaatat tgagaccaat atgcagaagc tgcatgaagt agagcagtag aataacagtg  
7141 aggaaaaaca ggtgaaagcc tgtatagaaa atgtgtccca tcttataaac agaggaaaca  
7201 atttgttgac cgatttaaat gattacgatg tagtaagcca tagtgccggc aaagaaataa  
7261 ctgatgagag tacaaaagag tacattacaa agattaaagg aaaggtaaat aataccatag  
7321 aggcatttca aaaggtgtta gaaaacattc aggaaaataa atcgcacaca cagaacaatg  
7381 gagattttaa taaaggcata tacgaaatat ggaaaagggc taacgaaatt aaggcaact  
7441 tcacggaaaa ttttccagaa aatgataact actttcaagt gggggattat ctaaaggata  
7501 taaaaaacat tttgaacgaa actgttggag gtgccaacat agaggaatat atcaaaagcg  
7561 ttttcaaaaa tattgaagaa caaataaagg gtacacaaaa tcatcgtaat gtggaatcca  
7621 ttttaaaaagc caaaaaaag attcaatctt ataataagaa ggcaaacaaa acattacaat  
7681 ctatgaacac tgctcaggat aaaattttgt taagaaaaaa agacatggat aatatattta  
7741 gtattctatc cgtaaatatg aagaatagtg tgtacataaa tacgaaaaaa tatattaacg  
7801 aggtggatga tttatttaac aagttaaaag tggatgtaca taagttggaa aattttataa  
7861 atgatactga actgagaata aagcagttag aggaagagga agctaagctc aaaattaaga  
7921 atgcagttaa tgggtgattg aatgagcatt ctgaggatgc ttctcgtgat gaggacgacg  
7981 aaccattagg tgaggttacg caaaattcag attcgggaagg gtcaagtgtat aaccaaata  
8041 ggcgtaaacy aaatggtgca agtagccatt caaaaggaaa ttcttctaata aactctttga  
8101 ataagtgcga tggattaaaa gaagataata aaactgggtga caaccattct gatgacaatc  
8161 agaaagaaga atctcataat ggaagtaata attcgggtgg aaaaggctca cgggagaggt  
8221 tcagatatgc tggaggaatt acgctagcat tttttatttg ctcaagtgtc ggattcgcga  
8281 tcattaaata taaaaatcat gaatcacaa aagccgattt cggaacagac aaggagcact  
8341 ttgaggggga taaagatttt aataaacggg aaaaggagga aattattgaa gtttctttta  
8401 acgaaaaatga acactatgaa tga

//

**Alignment: Pvrblp1a**

```

      ....|....| ....|....| ....|....| ....|....| ....|....|
      5         15         25         35         45         55
1a_SalI  ATGAAAAGGG GGATTTGCCT AGCAGCGCTT CTTTGCCTGT TCAACTATTT AGGTGCAGGG
1a_Thai  ATGAAAAGGG GGATTTGCCT AGCAGCGCTT CTTTGCCTGT TCAACTATTT AGGTGCAGGG
Conservation *****
      ....|....| ....|....| ....|....| ....|....| ....|....|
      65         75         85         95         105        115
1a_SalI  CACGGAGAAA ATGCAGAAGA AGACATAAGG AATAGCGAAG GGAAAGTAAA CTTCTTTTCG
1a_Thai  CACGGAGAAA ATGCAGAAGA AGACATAAGG AATAGCGAAG GGAAAGTAAA CTTCTTTTCG
Conservation *****
      ....|....| ....|....| ....|....| ....|....| ....|....|
      125        135        145        155        165        175
1a_SalI  CTGATTCTA ATTTAAAGAA AAATAAAAAG TCGAAACATA ATAGGGTGAA AAGAAGGAAC
1a_Thai  CTGATTCTA ATTTAAAGAA AAATAAAAAG TCGAAACATA ATAGGGTGAA AAGAAGGAAC
Conservation *****
      ....|....| ....|....| ....|....| ....|....| ....|....|
      185        195        205        215        225        235
1a_SalI  GCGAAAATTT CGAACTTCTT AAGCCAAAAA GCGTATGTTA AAGAAACAGA TAACGCAAGT
1a_Thai  GCGAAAATTT CGAACTTCTT AAGCCAAAAA GCGTATGTTA AAGAAACAGA TAACGCAAGT
Conservation *****
      ....|....| ....|....| ....|....| ....|....| ....|....|
      245        255        265        275        285        295
1a_SalI  GGAAAAGACG CTGAAGGATC ACGTCCGTCT CATGATTCAT CGTTTGTTAA CTTAAACGGT
1a_Thai  GGAAAAGACG CTGAAGGATC ACGTCCGTCT CATGATTCAT CGTTTGTTAA CTTAAACGGT
Conservation *****
      ....|....| ....|....| ....|....| ....|....| ....|....|
      305        315        325        335        345        355
1a_SalI  CATGTCGATG GAAAAAGTTT ATCATACAGC GTTCATGTAA AAGAAAGTAC ACCACATAGT
1a_Thai  CATGTCGATG GAAAAAGTTT ATCATACAGC GTTCATGTAA AAGAAAGTAC ACCACATAGT
Conservation *****
      ....|....| ....|....| ....|....| ....|....| ....|....|
      365        375        385        395        405        415
1a_SalI  ACTACGCGGG AGAGCACGGA AAAGGGAAAA GAAAATGAGA AAATACAGGG TGTCTTAAGC
1a_Thai  ACTACGCGGG AGAGCACGGA AAAGGGAAAA GAAAATGAGA AAATACAGGG TGTCTTAAGC
Conservation *****
      ....|....| ....|....| ....|....| ....|....| ....|....|
      425        435        445        455        465        475
1a_SalI  TCTTTTGTGC AAAGCCAAGA AGGGGGAGAA TCAGACGATT TGGAGGGAAT GTACAATTCT
1a_Thai  TCTTTTGTGC AAAGCCAAGA AGGGGGAGAA TCAGACGATT TGGAGGGAAT GTACAATTCT
Conservation *****
      ....|....| ....|....| ....|....| ....|....| ....|....|
      485        495        505        515        525        535
1a_SalI  ATAGTTGATA TGAGCGAGAA ACTGAAAGAA AATGATAAGT ATAACCTAGT GTTTGACATG
1a_Thai  ATAGTTGATA TGAGCGAGAA ACTGAAAGAA AATGATAAGT ATAACCTAGT GTTTGACATG
Conservation *****
      ....|....| ....|....| ....|....| ....|....| ....|....|
      545        555        565        575        585        595
1a_SalI  GAGATTGATT TTGTTGACTT ACAATTTTTT AATCTAATTC TGGAGCTGAT TCCAAAGGAC
1a_Thai  GAGATTGATT TTGTTGACTT ACAATTTTTT AATCTAATTC TGGAGCTGAT TCCAAAGGAC
Conservation *****
      ....|....| ....|....| ....|....| ....|....| ....|....|
      605        615        625        635        645        655

```

|              |             |            |            |            |            |             |
|--------------|-------------|------------|------------|------------|------------|-------------|
| 1a_SalI      | AGTCAATACC  | ATACCTACTA | TGAGGAAACA | CTTAAACAGC | AAGTTACAGA | ATACACAAAT  |
| 1a_Thai      | AGTAAATACC  | ATACCTACTA | TGAGGAAACA | CTTAAACAGC | AAGTTACAGA | ATACACAAAT  |
| Conservation | ***.*****   | *****      | *****      | *****      | *****      | *****       |
|              | .... ....   | .... ....  | .... ....  | .... ....  | .... ....  | .... ....   |
|              | 665         | 675        | 685        | 695        | 705        | 715         |
| 1a_SalI      | TCGTTGAAAA  | CGTTAATGGA | TTCATGCATA | TCTGAAAAAG | ATCAAATGAT | CATATTAGAG  |
| 1a_Thai      | TCGTTGAAAA  | CGTTAATGGA | TTCATGCATA | TCTGAAAAAG | ATCAAATGAT | CATATTAGAG  |
| Conservation | *****       | *****      | *****      | *****      | *****      | *****       |
|              | .... ....   | .... ....  | .... ....  | .... ....  | .... ....  | .... ....   |
|              | 725         | 735        | 745        | 755        | 765        | 775         |
| 1a_SalI      | TATGAGATTA  | ATTATGCCAA | GAGGAAGTCC | ATAGAAACAG | AGACGTTGGG | TGATAAGGAA  |
| 1a_Thai      | TATGAGATTA  | ATTATGCCAA | GAGGAAGTCC | ATAGAAACAG | AGACGTTGGG | TGATAAGGAA  |
| Conservation | *****       | *****      | *****      | *****      | *****      | *****       |
|              | .... ....   | .... ....  | .... ....  | .... ....  | .... ....  | .... ....   |
|              | 785         | 795        | 805        | 815        | 825        | 835         |
| 1a_SalI      | ACAAAACCTCT | CAGCAGTATC | TCAAGCCTAT | GCAAAACATC | TAGAATCGTA | TAAGGGAGTA  |
| 1a_Thai      | ACAAAACCTCT | CAGCAGTATC | TCAAGCCTAT | GCAATACATC | TAGAATCGTA | TAAGGGAGTA  |
| Conservation | *****       | *****      | *****      | ***.*****  | *****      | *****       |
|              | .... ....   | .... ....  | .... ....  | .... ....  | .... ....  | .... ....   |
|              | 845         | 855        | 865        | 875        | 885        | 895         |
| 1a_SalI      | TTAAAGCCCA  | AATTAAATGA | TATAAAAAAT | AATGCCTTTT | CAGTTTGTAA | GGATTCCTAC  |
| 1a_Thai      | TTAAAGCCCA  | AATTAAATGA | TATAAAAAAT | AATGCCTTTT | CAGTTTGTAA | GGATTCCTAC  |
| Conservation | *****       | *****      | *****      | *****      | *****      | *****       |
|              | .... ....   | .... ....  | .... ....  | .... ....  | .... ....  | .... ....   |
|              | 905         | 915        | 925        | 935        | 945        | 955         |
| 1a_SalI      | TGTAAGGATA  | ACTGTGGGGA | ATATGTGCAG | AAATATAATA | CAATGCGCAA | GAATTTTATA  |
| 1a_Thai      | TGTAAGGATA  | ACTGTGGGGA | ATATGTGCAG | AAATATAATA | CAATGCGCAA | GAATTTTATA  |
| Conservation | *****       | *****      | *****      | *****      | *****      | *****       |
|              | .... ....   | .... ....  | .... ....  | .... ....  | .... ....  | .... ....   |
|              | 965         | 975        | 985        | 995        | 1005       | 1015        |
| 1a_SalI      | TCAAGTTCAG  | ATCAGTATAA | AATGGAAGCA | TATATGTACA | TTCCGAAGAG | CATTAACGAT  |
| 1a_Thai      | TCAAGTTCAG  | ATCAGTATAA | AATGGAAGCA | TATATGTACA | TTCCGAAGAG | CATTAACGAT  |
| Conservation | *****       | *****      | *****      | *****      | *****      | *****       |
|              | .... ....   | .... ....  | .... ....  | .... ....  | .... ....  | .... ....   |
|              | 1025        | 1035       | 1045       | 1055       | 1065       | 1075        |
| 1a_SalI      | TATACAGTGC  | TAGATAAAAT | TTTATCAGAA | TCTAACGAAC | TAGGTATAGA | CATTCAAGAA  |
| 1a_Thai      | TATACAGTGC  | TAGATAAAAT | TTTATCAGAA | TCTAACGAAC | TAGGTATAGA | CATTCAAGAA  |
| Conservation | *****       | *****      | *****      | *****      | *****      | *****       |
|              | .... ....   | .... ....  | .... ....  | .... ....  | .... ....  | .... ....   |
|              | 1085        | 1095       | 1105       | 1115       | 1125       | 1135        |
| 1a_SalI      | ACTGTTAATT  | CGCTGAAGCT | GTTAGGAGAA | GAAATTAGTG | AAGTTTCCCA | TTGTATATGTC |
| 1a_Thai      | AATGTTAATT  | CGCTGAAGCT | GTTAGGAGAA | GAAATTAGTG | AAGTTTCCCA | TTGTATATGTC |
| Conservation | *.*****     | *****      | *****      | *****      | *****      | *****       |
|              | .... ....   | .... ....  | .... ....  | .... ....  | .... ....  | .... ....   |
|              | 1145        | 1155       | 1165       | 1175       | 1185       | 1195        |
| 1a_SalI      | ATTAACAGTA  | CGTTAATTGA | CGATGCAGCC | AAAAAATTAG | AATCCATAAA | TGAAGAGGAC  |
| 1a_Thai      | ATTAACAGTA  | CGTTAATTGA | CGATGCAGCC | AAAAAATTAG | AATCCATAAA | TGAAGAGGAC  |
| Conservation | *****       | *****      | *****      | *****      | *****      | *****       |
|              | .... ....   | .... ....  | .... ....  | .... ....  | .... ....  | .... ....   |
|              | 1205        | 1215       | 1225       | 1235       | 1245       | 1255        |
| 1a_SalI      | GAATCTGCAG  | AAATAGATTT | ACAAAAATTT | GAAGATAATT | CAAAGCGCT  | AGCAAACAAC  |
| 1a_Thai      | GAATCTGCAG  | AAATAGATTT | ACAAAAATTT | GAAGATAATT | CAAAGCGCT  | AGCAAACAAC  |
| Conservation | *****       | *****      | *****      | *****      | *****      | *****       |

|              |            |             |            |            |            |            |
|--------------|------------|-------------|------------|------------|------------|------------|
|              | .... ....  | .... ....   | .... ....  | .... ....  | .... ....  | .... ....  |
|              | 1265       | 1275        | 1285       | 1295       | 1305       | 1315       |
| 1a_SalI      | TACTGCATTT | TTCAATACAT  | AAAAACGCTT | AACGAACCAA | TTAAGAAAGC | ATATGAAAGT |
| 1a_Thai      | TACTGCATTT | TTCAATACAT  | AAAAACGCTT | AACGAACCAA | TTAAGAAAGC | ATATGAAAGT |
| Conservation | *****      | *****       | *****      | *****      | *****      | *****      |
|              | .... ....  | .... ....   | .... ....  | .... ....  | .... ....  | .... ....  |
|              | 1325       | 1335        | 1345       | 1355       | 1365       | 1375       |
| 1a_SalI      | AAGGTAATAA | AATCTAATGA  | ACTACTGTCT | ACCATTATAG | ACACGTTAGG | AAAAAGTGCT |
| 1a_Thai      | AAGGTAATAA | AATCTAATGA  | ACTACTGTCT | ACCATTATAG | ACACGTTAGG | AAAAAGTGCT |
| Conservation | *****      | *****       | *****      | *****      | *****      | *****      |
|              | .... ....  | .... ....   | .... ....  | .... ....  | .... ....  | .... ....  |
|              | 1385       | 1395        | 1405       | 1415       | 1425       | 1435       |
| 1a_SalI      | ACTGCGTGC  | AGGAGTCGAC  | ATTTAATCAA | GAGGAGTGCA | ATAAAATTAA | AACCGAAGCG |
| 1a_Thai      | ACTGCGTGC  | AGGAGTCGAC  | ATTTAATCAA | GAGGAGTGCA | ATAAAATTAA | AACCGAAGCG |
| Conservation | *****      | *****       | *****      | *****      | *****      | *****      |
|              | .... ....  | .... ....   | .... ....  | .... ....  | .... ....  | .... ....  |
|              | 1445       | 1455        | 1465       | 1475       | 1485       | 1495       |
| 1a_SalI      | GAAAAAGTAA | AAGATGACGC  | TGAAGATATA | TACGAAAAAA | ATGAACAGAT | ATACTACGAA |
| 1a_Thai      | GAAAAAGTAA | AAGATGACGC  | TGAAGATATA | TACGAAAAAA | ATGAACAGAT | ATACTACGAA |
| Conservation | *****      | *****       | *****      | *****      | *****      | *****      |
|              | .... ....  | .... ....   | .... ....  | .... ....  | .... ....  | .... ....  |
|              | 1505       | 1515        | 1525       | 1535       | 1545       | 1555       |
| 1a_SalI      | ATTCCAGAAA | GTGAGGACGA  | AACAATAGCT | GATAAGATAA | ACGATCTTCA | GTACCTTATA |
| 1a_Thai      | ATTCCAGAAA | GTGAGGACGA  | AACAATAGAT | GATAAGATAA | ACGATCTTCA | GTACCTTATA |
| Conservation | *****      | *****       | *****      | *****      | *****      | *****      |
|              | .... ....  | .... ....   | .... ....  | .... ....  | .... ....  | .... ....  |
|              | 1565       | 1575        | 1585       | 1595       | 1605       | 1615       |
| 1a_SalI      | GACCAAATGA | ATGAATATAA  | AGATGAAATA | GTAACAATT  | CGGAGTTCAT | TTCTAATAGA |
| 1a_Thai      | GACCAAATGA | AAGATTATAA  | AGATGAAATA | GTAACAATT  | CGGAGTTCAT | TTCTAATAGA |
| Conservation | *****      | *:*:*:***** | *****      | *****      | *****      | *****      |
|              | .... ....  | .... ....   | .... ....  | .... ....  | .... ....  | .... ....  |
|              | 1625       | 1635        | 1645       | 1655       | 1665       | 1675       |
| 1a_SalI      | TATAAAAATA | TATACGAAAA  | CTTAAAAGAA | ACGTATGAAA | CGGAATTAAA | TGATATAGGA |
| 1a_Thai      | TATAAAAATA | TATACGAAAA  | CTTAAAAGAA | ACGTATGAAA | CGGAATTAAA | TGATATAGGA |
| Conservation | *****      | *****       | *****      | *****      | *****      | *****      |
|              | .... ....  | .... ....   | .... ....  | .... ....  | .... ....  | .... ....  |
|              | 1685       | 1695        | 1705       | 1715       | 1725       | 1735       |
| 1a_SalI      | CAACTAGAAA | ACGACACATC  | AAAAGTAAAT | TTTTATTTGA | TGCAAATAAG | AAAAATTAAC |
| 1a_Thai      | CAACTAGAAA | ACGACACATC  | AAAAGTAAAT | TTTTATTTGA | TGCAAATAAG | AAAAATTAAC |
| Conservation | *****      | *****       | *****      | *****      | *****      | *****      |
|              | .... ....  | .... ....   | .... ....  | .... ....  | .... ....  | .... ....  |
|              | 1745       | 1755        | 1765       | 1775       | 1785       | 1795       |
| 1a_SalI      | ACTGAGAAAA | CCAAAATAGA  | TGAAAGTTTA | CAAACAGTGG | AAAAATTTTA | CAAAGGAATA |
| 1a_Thai      | ACTGAGAAAA | CCAAAATAGA  | TGAAAGTTTA | CAAACAGTGG | AAAAATTTTA | CAAAGAAATA |
| Conservation | *****      | *****       | *****      | *****      | *****      | *****      |
|              | .... ....  | .... ....   | .... ....  | .... ....  | .... ....  | .... ....  |
|              | 1805       | 1815        | 1825       | 1835       | 1845       | 1855       |
| 1a_SalI      | TTGAATTTGA | AAGAAAAAAT  | ATATGAACTG | AAGATAGAGT | TTGAAAAAAG | CGTCACAGAA |
| 1a_Thai      | TTGATTTTGA | AAGAAAAAAT  | ATATGAACTG | AAGATAGAGT | TTGAAAAAAG | CGTCACAGAA |
| Conservation | **..*****  | *****       | *****      | *****      | *****      | *****      |
|              | .... ....  | .... ....   | .... ....  | .... ....  | .... ....  | .... ....  |
|              | 1865       | 1875        | 1885       | 1895       | 1905       | 1915       |

|              |            |             |            |            |             |            |
|--------------|------------|-------------|------------|------------|-------------|------------|
| 1a_SalI      | ATAAATCGAT | TACAGGATGG  | GGAATCTGCG | CGTGATTTAC | ATGAAGAACA  | GATCAAAGAG |
| 1a_Thai      | ATAAATCGAT | TACAGGATGG  | GGAATCTGCG | CGTGATTTAC | ATGAAGAACA  | GATCAAAGAG |
| Conservation | *****      | *****       | *****      | *****      | *****       | *****      |
|              | .... ....  | .... ....   | .... ....  | .... ....  | .... ....   | .... ....  |
|              | 1925       | 1935        | 1945       | 1955       | 1965        | 1975       |
| 1a_SalI      | ATATTAGACA | AGATGGCGAA  | AAAGGTGCAT | TATTTAAAAG | AACTTCTCTC  | CTTAAAAGGG |
| 1a_Thai      | ATATTAGACA | AGATGGCGAA  | AAAGGTGCAT | TATTTAAAAG | AACTTCTCTC  | CTTAAAAGGG |
| Conservation | *****      | *****       | *****      | *****      | *****       | *****      |
|              | .... ....  | .... ....   | .... ....  | .... ....  | .... ....   | .... ....  |
|              | 1985       | 1995        | 2005       | 2015       | 2025        | 2035       |
| 1a_SalI      | AAATCAAGTG | TGTACTTCAC  | CGAAATGAAT | GAATTGCTCA | ACACAGCATC  | GTATGACAAT |
| 1a_Thai      | AAATCAAGTG | TGTACTTCAC  | CGAAATGAAT | GAATTGCTCA | ACACAGCATC  | GTATGACAAT |
| Conservation | *****      | *****       | *****      | *****      | *****       | *****      |
|              | .... ....  | .... ....   | .... ....  | .... ....  | .... ....   | .... ....  |
|              | 2045       | 2055        | 2065       | 2075       | 2085        | 2095       |
| 1a_SalI      | ATGGAGGGGT | TTAGCGCTAA  | GAAGGAGAAG | GCGGACAATG | ACATTAATGC  | TCTATATAAT |
| 1a_Thai      | ATGGAGGGGT | TTAGCGCTAA  | GAAGGAGAAG | GCGGACAATG | ACATTAATGC  | TCTATATAAT |
| Conservation | *****      | *****       | *****      | *****      | *****       | *****      |
|              | .... ....  | .... ....   | .... ....  | .... ....  | .... ....   | .... ....  |
|              | 2105       | 2115        | 2125       | 2135       | 2145        | 2155       |
| 1a_SalI      | TCTGTGTATA | GGAAGATAT   | AAATGCTCTC | ATCGAAGAAG | TTGAAAAATT  | TGTAACCGAA |
| 1a_Thai      | TCTGTGTATA | GGAAGATAT   | AAATGCTCTC | ATCGAAGAAG | TTGAAAAATT  | TGTAACCGAA |
| Conservation | *****      | *****       | *****      | *****      | *****       | *****      |
|              | .... ....  | .... ....   | .... ....  | .... ....  | .... ....   | .... ....  |
|              | 2165       | 2175        | 2185       | 2195       | 2205        | 2215       |
| 1a_SalI      | AATAAAGAAA | GCACCTCTGGA | GATGCTAAAA | GATGAAGAAA | TGGAAGAGAA  | GCTACAGGAT |
| 1a_Thai      | AATAAAGAAA | GCACCTCTGGA | GATGCTAAAA | GATGAAGAAA | TGGAAGAGAA  | GCTACAGGAT |
| Conservation | *****      | *****       | *****      | *****      | *****       | *****      |
|              | .... ....  | .... ....   | .... ....  | .... ....  | .... ....   | .... ....  |
|              | 2225       | 2235        | 2245       | 2255       | 2265        | 2275       |
| 1a_SalI      | GCCAAAGAAA | CTTTTGCTAA  | ATTAATTTT  | GTTAGCGATG | ACAAGCTGAC  | AGATGTGTAC |
| 1a_Thai      | GCCAAAGAAA | CTTTTGCTAA  | ATTAATTTT  | GTTAGCGATG | ACAAGCTGAC  | AGATGTGTAC |
| Conservation | *****      | *****       | *****      | *****      | *****       | *****      |
|              | .... ....  | .... ....   | .... ....  | .... ....  | .... ....   | .... ....  |
|              | 2285       | 2295        | 2305       | 2315       | 2325        | 2335       |
| 1a_SalI      | ACCAAAATGA | GTGCAGAAGT  | GACTAATGCT | GAAGGGATCA | AAAAAGAAAT  | TGCGCAAAAA |
| 1a_Thai      | ACCAAAATGA | GTGCAGAAGT  | GACTAATGCT | GAAGGGATCA | AAAAAGAAAT  | TGCGCAAAAA |
| Conservation | *****      | *****       | *****      | *****      | *****       | *****      |
|              | .... ....  | .... ....   | .... ....  | .... ....  | .... ....   | .... ....  |
|              | 2345       | 2355        | 2365       | 2375       | 2385        | 2395       |
| 1a_SalI      | CAATTCGAAA | ATGTTTCATAA | AAAAATGAAA | GAATTTTCGG | ATGCGTTTTTC | CACAAAATTT |
| 1a_Thai      | CAATTCGAAA | ATGTTTCATAA | AAAAATGAAA | GAATTTTCGG | ATGCGTTTTTC | CACAAAATTT |
| Conservation | *****      | *****       | *****      | *****      | *****       | *****      |
|              | .... ....  | .... ....   | .... ....  | .... ....  | .... ....   | .... ....  |
|              | 2405       | 2415        | 2425       | 2435       | 2445        | 2455       |
| 1a_SalI      | GAAGCGTTGC | AAAACAGCAT  | GCAGCAGTAC | AATCAGGAGG | GAGACGCGAT  | AGAAAAGCAT |
| 1a_Thai      | GAAGCGTTGC | AAAACAGCAT  | GCAGCAGTAC | AATCAGGAGG | GAGACGCGAT  | AGAAAAGCAT |
| Conservation | *****      | *****       | *****      | *****      | *****       | *****      |
|              | .... ....  | .... ....   | .... ....  | .... ....  | .... ....   | .... ....  |
|              | 2465       | 2475        | 2485       | 2495       | 2505        | 2515       |
| 1a_SalI      | AAGCAAAATA | GATCCGAAAA  | GGAGGAGGAA | TATTTTAAAA | ATGAAAGCGT  | AGAAGAAGAT |
| 1a_Thai      | AAGCAAAATA | GATCCGAAAA  | GGAGGAGGAA | TATTTTAAAA | ATGAAAGCGT  | AGAAGAAGAT |
| Conservation | *****      | *****       | *****      | *****      | *****       | *****      |

|              |            |             |            |            |            |            |
|--------------|------------|-------------|------------|------------|------------|------------|
|              | .... ....  | .... ....   | .... ....  | .... ....  | .... ....  | .... ....  |
|              | 2525       | 2535        | 2545       | 2555       | 2565       | 2575       |
| 1a_SalI      | CTATCCAGGG | AAGAAACAGA  | AGAGCAAGAA | TACACTAAAC | ATAAGAATAA | TTTTTCCAGA |
| 1a_Thai      | CTATCCAGGG | AAGAAACAGA  | AGAGCAAGAA | TACACTAAAC | ATAAGAATAA | TTTTTCCAGA |
| Conservation | *****      | *****       | *****      | *****      | *****      | *****      |
|              | .... ....  | .... ....   | .... ....  | .... ....  | .... ....  | .... ....  |
|              | 2585       | 2595        | 2605       | 2615       | 2625       | 2635       |
| 1a_SalI      | CGGAAAGGTG | AAATATCAGC  | AGAAATTACC | AACATGAGGG | AAGTCATAAA | TAAAATTGAG |
| 1a_Thai      | CGGAAAGGTG | AAATATCAGC  | AGAAATTACC | AACATGAGGG | AAGTCATAAA | TAAAATTGAG |
| Conservation | *****      | *****       | *****      | *****      | *****      | *****      |
|              | .... ....  | .... ....   | .... ....  | .... ....  | .... ....  | .... ....  |
|              | 2645       | 2655        | 2665       | 2675       | 2685       | 2695       |
| 1a_SalI      | AGCCAATTAA | ACTATTACGG  | GGTTATTGAA | AAATATTTCT | CCCTCATTGG | CGATCAGAAT |
| 1a_Thai      | AGCCAATTAA | ACTATTACGG  | GGTTATTGAA | AAATATTTCT | CCCTCATTGG | CGATCAGAAT |
| Conservation | *****      | *****       | *****      | *****      | *****      | *****      |
|              | .... ....  | .... ....   | .... ....  | .... ....  | .... ....  | .... ....  |
|              | 2705       | 2715        | 2725       | 2735       | 2745       | 2755       |
| 1a_SalI      | GAAGTGTCAA | CGGCTAAAGC  | GTAAAGGAA  | AAGATTGTTA | GTGATAGTTT | GAGGGACAAA |
| 1a_Thai      | GAAGTGTCAA | CGGCTAAAGC  | GTAAAGGAA  | AAGATTGTTA | GTGATAGTTT | GAGGGACAAA |
| Conservation | *****      | *****       | *****      | *****      | *****      | *****      |
|              | .... ....  | .... ....   | .... ....  | .... ....  | .... ....  | .... ....  |
|              | 2765       | 2775        | 2785       | 2795       | 2805       | 2815       |
| 1a_SalI      | ATAGACCAGT | ACGAGACAGA  | ATTCAAAGAG | AAAACCAGTG | CAGTGGAAAA | TACCGTCTCA |
| 1a_Thai      | ATAGACCAGT | ACGAGACAGA  | ATTCAAAGAG | AAAACCAGTG | CAGTGGAAAA | TACCGTCTCA |
| Conservation | *****      | *****       | *****      | *****      | *****      | *****      |
|              | .... ....  | .... ....   | .... ....  | .... ....  | .... ....  | .... ....  |
|              | 2825       | 2835        | 2845       | 2855       | 2865       | 2875       |
| 1a_SalI      | ACTATTCAAA | GTTTAAAGTAA | GGCAATAGAT | TCACTTAAAC | GTTTAAATGG | TAGCATAAAC |
| 1a_Thai      | ACTATTCAAA | GTTTAAAGTAA | GGCAATAGAT | TCACTTAAAC | GTTTAAATGG | TAGCATAAAC |
| Conservation | *****      | *****       | *****      | *****      | *****      | *****      |
|              | .... ....  | .... ....   | .... ....  | .... ....  | .... ....  | .... ....  |
|              | 2885       | 2895        | 2905       | 2915       | 2925       | 2935       |
| 1a_SalI      | AACTGCAAAA | AATATAACAC  | AGATATTGAT | CTTTTGAGGA | GCAAAATAAA | AACTCTACGA |
| 1a_Thai      | AACTGCAAAA | AATATAACAC  | AGATATTGAT | CTTTTGAGGA | GCAAAATAAA | AACTCTACGA |
| Conservation | *****      | *****       | *****      | *****      | *****      | *****      |
|              | .... ....  | .... ....   | .... ....  | .... ....  | .... ....  | .... ....  |
|              | 2945       | 2955        | 2965       | 2975       | 2985       | 2995       |
| 1a_SalI      | GAAGAGGTAC | AAAAGGAAAT  | TGCCGAAACG | GAGGGCGATA | AAGTGGTGGG | CGAAAATACC |
| 1a_Thai      | GAAGAGGTAC | AAAAGGAAAT  | TGCCGAAACG | GAGGGCGATA | AAGTGGTGGG | CGAAAATACC |
| Conservation | *****      | *****       | *****      | *****      | *****      | *****      |
|              | .... ....  | .... ....   | .... ....  | .... ....  | .... ....  | .... ....  |
|              | 3005       | 3015        | 3025       | 3035       | 3045       | 3055       |
| 1a_SalI      | ACTGCGTTAC | TTTTAAAAAG  | CTTAAGAGAC | AAAATGGGAA | AGATAAACGA | GAAATTGAAC |
| 1a_Thai      | ACTGCGTTAC | TTTTAAAAAG  | CTTAAGAGAC | AAAATGGGAA | AGATAAACGA | GAAATTGAAC |
| Conservation | *****      | *****       | *****      | *****      | *****      | *****      |
|              | .... ....  | .... ....   | .... ....  | .... ....  | .... ....  | .... ....  |
|              | 3065       | 3075        | 3085       | 3095       | 3105       | 3115       |
| 1a_SalI      | GATGGTAGAC | TAAACAGTTT  | AGACACTAAA | AAAGAAGATC | TGCTGAAGTT | TTACTCAGAA |
| 1a_Thai      | GATGGTAGAC | TAAACAGTTT  | AGACACTAAA | AAAGAAGATC | TGCTGAAGTT | TTACTCAGAA |
| Conservation | *****      | *****       | *****      | *****      | *****      | *****      |

|              |            |            |            |            |            |            |
|--------------|------------|------------|------------|------------|------------|------------|
|              | .... ....  | .... ....  | .... ....  | .... ....  | .... ....  | .... ....  |
|              | 3125       | 3135       | 3145       | 3155       | 3165       | 3175       |
| 1a_SalI      | TCGAAGTCGA | AAATTCATTT | GAGCAAAGAC | CAAAGGGGC  | CACAAGATCC | GTTGAATAGA |
| 1a_Thai      | TCGAAGTCGA | AAATTCATTT | GAGCAAAGAC | CAAAGGGGC  | CACAAGATCC | GTTGAATAGA |
| Conservation | *****      | *****      | *****      | *****      | *****      | *****      |
|              | .... ....  | .... ....  | .... ....  | .... ....  | .... ....  | .... ....  |
|              | 3185       | 3195       | 3205       | 3215       | 3225       | 3235       |
| 1a_SalI      | ATTGACGAAT | GGGAAGACAT | CAAAGGGAA  | GTAGACGAAC | TAAATGTTAA | TTACCAGGTG |
| 1a_Thai      | ATTGACGAAT | GGGAAGACAT | CAAAGGGAA  | GTAGACGAAC | TAAATGTTAA | TTACCAGGTG |
| Conservation | *****      | *****      | *****      | *****      | *****      | *****      |
|              | .... ....  | .... ....  | .... ....  | .... ....  | .... ....  | .... ....  |
|              | 3245       | 3255       | 3265       | 3275       | 3285       | 3295       |
| 1a_SalI      | ATTAGCGAAA | ATAAAGTTAC | GCTATTTAAA | AATAACTCTG | TCACTTATAT | AGAGGCAATG |
| 1a_Thai      | ATTAGCGAAA | ATAAAGTTAC | GCTATTTAAA | AATAACTCTG | TCACTTATAT | AGAGGCAATG |
| Conservation | *****      | *****      | *****      | *****      | *****      | *****      |
|              | .... ....  | .... ....  | .... ....  | .... ....  | .... ....  | .... ....  |
|              | 3305       | 3315       | 3325       | 3335       | 3345       | 3355       |
| 1a_SalI      | CATAGCCATA | TAAATACTGT | TGCTCATGGA | ATAACGAGCA | ATAAGAATGA | AATTTTGAAG |
| 1a_Thai      | CATAGCCATA | TAAATACTGT | TGCTCATGGA | ATAACGAGCA | ATAAGAATGA | AATTTTGAAG |
| Conservation | *****      | *****      | *****      | *****      | *****      | *****      |
|              | .... ....  | .... ....  | .... ....  | .... ....  | .... ....  | .... ....  |
|              | 3365       | 3375       | 3385       | 3395       | 3405       | 3415       |
| 1a_SalI      | TCCGTAAAGG | AAGTAGAAGA | TAAACTAAAC | CTCGTTGAAC | AGAATGAAGA | TTACAAAAAG |
| 1a_Thai      | TCCGTAAAGG | AAGTAGAAGA | TAAACTAAAC | CTCGTTGAAC | AGAATGAAGA | TTACAAAAAG |
| Conservation | *****      | *****      | *****      | *****      | *****      | *****      |
|              | .... ....  | .... ....  | .... ....  | .... ....  | .... ....  | .... ....  |
|              | 3425       | 3435       | 3445       | 3455       | 3465       | 3475       |
| 1a_SalI      | GTAAAAATC  | CAGAAAATGA | GAAGCAATTA | GAAGCCATAA | GGGGATCCAT | GAGCAAGCTC |
| 1a_Thai      | GTAAAAATC  | CAGAAAATGA | GAAGCAATTA | GAAGCCATAA | GGGGATCCAT | GAGCAAGCTC |
| Conservation | *****      | *****      | *****      | *****      | *****      | *****      |
|              | .... ....  | .... ....  | .... ....  | .... ....  | .... ....  | .... ....  |
|              | 3485       | 3495       | 3505       | 3515       | 3525       | 3535       |
| 1a_SalI      | AAGGAAGTGA | TCAACAAACA | CGTCAGCGAA | ATGACCCAAC | TGGAGAGCAC | AGCAAACACT |
| 1a_Thai      | AAGGAAGTGA | TCAACAAACA | CGTCAGCGAA | ATGACCCAAC | TGGAGAGCAC | AGCAAACACT |
| Conservation | *****      | *****      | *****      | *****      | *****      | *****      |
|              | .... ....  | .... ....  | .... ....  | .... ....  | .... ....  | .... ....  |
|              | 3545       | 3555       | 3565       | 3575       | 3585       | 3595       |
| 1a_SalI      | TTAAAGAGCA | ATGCCAAGGG | AAAGGAAAAC | GAACACGATC | TGGAAGAGCT | AAATAAGACA |
| 1a_Thai      | TTAAAGAGCA | ATGCCAAGGG | AAAGGAAAAC | GAACACGATC | TGGAAGAGCT | AAATAAGACA |
| Conservation | *****      | *****      | *****      | *****      | *****      | *****      |
|              | .... ....  | .... ....  | .... ....  | .... ....  | .... ....  | .... ....  |
|              | 3605       | 3615       | 3625       | 3635       | 3645       | 3655       |
| 1a_SalI      | AAGGGACAAA | TGAGGGATAT | TTATGAAAAG | TTGAAGAAGA | TAGCGGAGGA | ACTAAAGGAA |
| 1a_Thai      | AAGGGACAAA | TGAGGGATAT | TTATGAAAAG | TTGAAGAAGA | TAGCGGAGGA | ACTAAAGGAA |
| Conservation | *****      | *****      | *****      | *****      | *****      | *****      |
|              | .... ....  | .... ....  | .... ....  | .... ....  | .... ....  | .... ....  |
|              | 3665       | 3675       | 3685       | 3695       | 3705       | 3715       |
| 1a_SalI      | GGAACAGTAA | ACGAATTGAA | GGATGCAAAT | GAAAAAGCAA | ACAAAGTAGA | ATTAGAGTTT |
| 1a_Thai      | GGAACAGTAA | ACGAATTGAA | GGATGCAAAT | GAAAAAGCAA | ACAAAGTAGA | ATTAGAGTTT |
| Conservation | *****      | *****      | *****      | *****      | *****      | *****      |

|              |            |            |            |            |            |            |
|--------------|------------|------------|------------|------------|------------|------------|
|              | .... ....  | .... ....  | .... ....  | .... ....  | .... ....  | .... ....  |
|              | 3725       | 3735       | 3745       | 3755       | 3765       | 3775       |
| 1a_SalI      | GAGAGGAACA | TTATTGGGCA | CGTTTTAGAA | CGGATTACAG | TAGAAAAGGA | CAAAGCTGGA |
| 1a_Thai      | GAGAGGAACA | TTATTGGGCA | CGTTTTAGAA | CGGATTACAG | TAGAAAAGGA | CAAAGCTGGA |
| Conservation | *****      | *****      | *****      | *****      | *****      | *****      |
|              |            |            |            |            |            |            |
|              | .... ....  | .... ....  | .... ....  | .... ....  | .... ....  | .... ....  |
|              | 3785       | 3795       | 3805       | 3815       | 3825       | 3835       |
| 1a_SalI      | AAGGTTGTTG | AAGAAATGAA | TTCTCTCAAA | ACTAAAATTG | AAAAATTGAT | ACAGGAAACA |
| 1a_Thai      | AAGGTTGTTG | AAGAAATGAA | TTCTCTCAAA | ACTAAAATTG | AAAAATTGAT | ACAGGAAACA |
| Conservation | *****      | *****      | *****      | *****      | *****      | *****      |
|              |            |            |            |            |            |            |
|              | .... ....  | .... ....  | .... ....  | .... ....  | .... ....  | .... ....  |
|              | 3845       | 3855       | 3865       | 3875       | 3885       | 3895       |
| 1a_SalI      | AGTGATGATT | CACAAAATGA | ATTAGTCACA | ACGAGTATTA | CAAACATTT  | AGAGAATGCA |
| 1a_Thai      | AGTGATGATT | CACAAAATGA | ATTAGTCACA | ACGAGTATTA | CAAACATTT  | AGAGAATGCA |
| Conservation | *****      | *****      | *****      | *****      | *****      | *****      |
|              |            |            |            |            |            |            |
|              | .... ....  | .... ....  | .... ....  | .... ....  | .... ....  | .... ....  |
|              | 3905       | 3915       | 3925       | 3935       | 3945       | 3955       |
| 1a_SalI      | AAGGGGTATG | AGGATGTAAT | AAAACGAAAT | GAAGAAGATT | CAATTCAGTT | GAGGGAGAAG |
| 1a_Thai      | AAGGGGTATG | AGGATGTAAT | AAAACGAAAT | GAAGAAGATT | CAATTCAGTT | GAGGGAGAAG |
| Conservation | *****      | *****      | *****      | *****      | *****      | *****      |
|              |            |            |            |            |            |            |
|              | .... ....  | .... ....  | .... ....  | .... ....  | .... ....  | .... ....  |
|              | 3965       | 3975       | 3985       | 3995       | 4005       | 4015       |
| 1a_SalI      | GCGAAAAGTC | TGGAGACATT | GGATGAAATG | AAAAAACTAG | TTCAGCAGGT | TAACATGAAT |
| 1a_Thai      | GCGAAAAGTC | TGGAGACATT | GGATGAAATG | AAAAAACTAG | TTCAGCAGGT | TAACATGAAT |
| Conservation | *****      | *****      | *****      | *****      | *****      | *****      |
|              |            |            |            |            |            |            |
|              | .... ....  | .... ....  | .... ....  | .... ....  | .... ....  | .... ....  |
|              | 4025       | 4035       | 4045       | 4055       | 4065       | 4075       |
| 1a_SalI      | TTGCAAAGTG | CTATACAAGG | CAATGCTGGT | ATAAGCAAAG | AGCTGAATGA | GCTTAAAGGC |
| 1a_Thai      | TTGCAAAGTG | CTATACAAGG | CAATGCTGGT | ATAAGCAAAG | AGCTGAATGA | GCTTAAAGGC |
| Conservation | *****      | *****      | *****      | *****      | *****      | *****      |
|              |            |            |            |            |            |            |
|              | .... ....  | .... ....  | .... ....  | .... ....  | .... ....  | .... ....  |
|              | 4085       | 4095       | 4105       | 4115       | 4125       | 4135       |
| 1a_SalI      | GTTATCGAAT | TGTTGATATC | AACGAATTAT | AGCAGCATTT | TAGAATATGT | AAAGAAAAAT |
| 1a_Thai      | GTTATCGAAT | TGTTGATATC | AACGAATTAT | AGCAGCATTT | TAGAATATGT | AAAGAAAAAT |
| Conservation | *****      | *****      | *****      | *****      | *****      | *****      |
|              |            |            |            |            |            |            |
|              | .... ....  | .... ....  | .... ....  | .... ....  | .... ....  | .... ....  |
|              | 4145       | 4155       | 4165       | 4175       | 4185       | 4195       |
| 1a_SalI      | TCCAGCGAGT | CTGTCCGTTT | TAGTCAGCTA | GCCAATGGGG | AATTTACAAA | GGCTGAAGGT |
| 1a_Thai      | TCCAGCGAGT | CTGTCCGTTT | TAGTCAGCTA | GCCAATGGGG | AATTTACAAA | GGCTGAAGGT |
| Conservation | *****      | *****      | *****      | *****      | *****      | *****      |
|              |            |            |            |            |            |            |
|              | .... ....  | .... ....  | .... ....  | .... ....  | .... ....  | .... ....  |
|              | 4205       | 4215       | 4225       | 4235       | 4245       | 4255       |
| 1a_SalI      | GAAGAGAAAA | ACGCAAGTGC | CAGATTTGCG | GAGGCAGAGA | AGTTAAAGGA | ACAAATTGTC |
| 1a_Thai      | GAAGAGAAAA | ACGCAAGTGC | CAGATTTGCG | GAGGCAGAGA | AGTTAAAGGA | ACAAATTGTC |
| Conservation | *****      | *****      | *****      | *****      | *****      | *****      |
|              |            |            |            |            |            |            |
|              | .... ....  | .... ....  | .... ....  | .... ....  | .... ....  | .... ....  |
|              | 4265       | 4275       | 4285       | 4295       | 4305       | 4315       |
| 1a_SalI      | AAAGATTTAG | ACTACAGTGA | CATAGATGAT | AAGGTAAAAA | AAATTGAGGG | AATCAAAAGA |
| 1a_Thai      | AAAGATTTAG | ACTACAGTGA | CATAGATGAT | AAGGTAAAAA | AAATTGAGGG | AATCAAAAGA |
| Conservation | *****      | *****      | *****      | *****      | *****      | *****      |



|              |            |            |             |            |             |            |
|--------------|------------|------------|-------------|------------|-------------|------------|
|              | .... ....  | .... ....  | .... ....   | .... ....  | .... ....   | .... ....  |
|              | 4325       | 4335       | 4345        | 4355       | 4365        | 4375       |
| 1a_SalI      | GAAATTTTAA | AGATGAAAGA | AAGTGCACATA | ACATTTTGGG | AAGAGTCAGA  | GAAGTTTAAA |
| 1a_Thai      | GAAATTTTAA | AGATGAAAGA | AAGTGCACATA | ACATTTTGGG | AAGAGTCAGA  | GAAGTTTAAA |
| Conservation | *****      | *****      | *****       | *****      | *****       | *****      |
|              |            |            |             |            |             |            |
|              | .... ....  | .... ....  | .... ....   | .... ....  | .... ....   | .... ....  |
|              | 4385       | 4395       | 4405        | 4415       | 4425        | 4435       |
| 1a_SalI      | CAAATGTGCT | CTTCACATAT | GGAAATGCT   | AAAGAGGGGA | AGAAAAAAT   | TGAGTATTTA |
| 1a_Thai      | CAAATGTGCT | CTTCACATAT | GGAAATGCT   | AAAGAGGGGA | AGAAAAAAT   | TGAGTATTTA |
| Conservation | *****      | *****      | *****       | *****      | *****       | *****      |
|              |            |            |             |            |             |            |
|              | .... ....  | .... ....  | .... ....   | .... ....  | .... ....   | .... ....  |
|              | 4445       | 4455       | 4465        | 4475       | 4485        | 4495       |
| 1a_SalI      | AAAAATAATG | GGGATGGAGG | AAAGGCCAAC  | ATAACGGATA | GCCAAATGGA  | GGAGGTAGGT |
| 1a_Thai      | AAAAATAATG | GGGATGGAGG | AAAGGCCAAC  | ATAACGGATA | GCCAAATGGA  | GGAGGTAGGT |
| Conservation | *****      | *****      | *****       | *****      | *****       | *****      |
|              |            |            |             |            |             |            |
|              | .... ....  | .... ....  | .... ....   | .... ....  | .... ....   | .... ....  |
|              | 4505       | 4515       | 4525        | 4535       | 4545        | 4555       |
| 1a_SalI      | AACTATGTTA | GCAAAGCTGA | GCACGCCTTT  | CACACAGTAG | AAGCACAGGT  | AGACAAAAC  |
| 1a_Thai      | AACTATGTTA | GCAAAGCTGA | GCACGCCTTT  | CACACAGTAG | AAGCACAGGT  | AGACAAAAC  |
| Conservation | *****      | *****      | *****       | *****      | *****       | *****      |
|              |            |            |             |            |             |            |
|              | .... ....  | .... ....  | .... ....   | .... ....  | .... ....   | .... ....  |
|              | 4565       | 4575       | 4585        | 4595       | 4605        | 4615       |
| 1a_SalI      | AAAGCCTTTT | ACGAATCCAT | CGTAGCTTAT  | GTAACGAAGA | TGGACAACCT  | GTTTAACGAA |
| 1a_Thai      | AAAGCCTTTT | ACGAATCCAT | CGTAGCTTAT  | GTAACGAAGA | TGGACAACCT  | GTTTAACGAA |
| Conservation | *****      | *****      | *****       | *****      | *****       | *****      |
|              |            |            |             |            |             |            |
|              | .... ....  | .... ....  | .... ....   | .... ....  | .... ....   | .... ....  |
|              | 4625       | 4635       | 4645        | 4655       | 4665        | 4675       |
| 1a_SalI      | TCGTTAATGA | AAGAAGTGAA | AGTGAAGTGT  | GAAAAAAGA  | ATGATGAAGC  | GGAGCAAATA |
| 1a_Thai      | TCGTTAATGA | AAGAAGTGAA | AGTGAAGTGT  | GAAAAAAGA  | ATGATGAAGC  | GGAGCAAATA |
| Conservation | *****      | *****      | *****       | *****      | *****       | *****      |
|              |            |            |             |            |             |            |
|              | .... ....  | .... ....  | .... ....   | .... ....  | .... ....   | .... ....  |
|              | 4685       | 4695       | 4705        | 4715       | 4725        | 4735       |
| 1a_SalI      | TTCGGCCAAA | TTAAAACCGT | AGATGGTAGA  | ATTAAAGCGC | GAGTGAGTGA  | GAATGAAAGA |
| 1a_Thai      | TTCGGCCAAA | TTAAAACCGT | AGATGGTAGA  | ATTAAAGCGC | GAGTGAGTGA  | GAATGAAAGA |
| Conservation | *****      | *****      | *****       | *****      | *****       | *****      |
|              |            |            |             |            |             |            |
|              | .... ....  | .... ....  | .... ....   | .... ....  | .... ....   | .... ....  |
|              | 4745       | 4755       | 4765        | 4775       | 4785        | 4795       |
| 1a_SalI      | AAAATAAGCG | AATTGAAGGA | AAAAGCCAAA  | GTTGAGAAAA | AGGAATCCTC  | GCAACTTAAC |
| 1a_Thai      | AAAATAAGCG | AATTGAAGGA | AAAAGCCAAA  | GTTGAGAAAA | AGGAATCCTC  | GCAACTTAAC |
| Conservation | *****      | *****      | *****       | *****      | *****       | *****      |
|              |            |            |             |            |             |            |
|              | .... ....  | .... ....  | .... ....   | .... ....  | .... ....   | .... ....  |
|              | 4805       | 4815       | 4825        | 4835       | 4845        | 4855       |
| 1a_SalI      | GATGTTTCCA | CGAAGTCGTT | ATTACAAATA  | GATAATTGCA | GACAACAGCT  | TGACAGCGTT |
| 1a_Thai      | GATGTTTCCA | CGAAGTCGTT | ATTACAAATA  | GATAATTGCA | GACAACAGCT  | TGACAGCGTT |
| Conservation | *****      | *****      | *****       | *****      | *****       | *****      |
|              |            |            |             |            |             |            |
|              | .... ....  | .... ....  | .... ....   | .... ....  | .... ....   | .... ....  |
|              | 4865       | 4875       | 4885        | 4895       | 4905        | 4915       |
| 1a_SalI      | TTGTCAAACA | TTGGAAGGGT | GAAACAAAAT  | GCACTTCAAT | ATTTTCGATTC | GGCTGATAAA |
| 1a_Thai      | TTGTCAAACA | TTGGAAGGGT | GAAACAAAAT  | GCACTTCAAT | ATTTTCGATTC | GGCTGATAAA |
| Conservation | *****      | *****      | *****       | *****      | *****       | *****      |

```

.....|.....| .....|.....| .....|.....| .....|.....| .....|.....|
    4925      4935      4945      4955      4965      4975
1a_SalI    TCGATGAAGT CCGTTTTGCC TATAAGCGAA TTGGGTGCCG AAAAAATCGCT AGACAAAGTA
1a_Thai    TCGATGAAGT CCGTTTTGCC TATAAGCGAA TTGGGTGCCG AAAAAATCGCT AGACAAAGTA
Conservation *****
.....|.....| .....|.....| .....|.....| .....|.....| .....|.....|
    4985      4995      5005      5015      5025      5035
1a_SalI    AAAGCGGCTA AGGAAAGTTA TGAGAAAAAT TTGGAAACCG TTCAAAATGA AATGAGTCGT
1a_Thai    AAAGCGGCTA AGGAAAGTTA TGAGAAAAAT TTGGAAACCG TTCAAAATGA AATGAGTCGT
Conservation *****
.....|.....| .....|.....| .....|.....| .....|.....| .....|.....|
    5045      5055      5065      5075      5085      5095
1a_SalI    ATTAATGTGG AAGAAGGAAG TCTGACCGAC ATAGACAAAA AAATAACTGA CATAGAAAAAT
1a_Thai    ATTAATGTGG AAGAAGGAAG TCTGACCGAC ATAGACAAAA AAATAACTGA CATAGAAAAAT
Conservation *****
.....|.....| .....|.....| .....|.....| .....|.....| .....|.....|
    5105      5115      5125      5135      5145      5155
1a_SalI    GACTTGCTAA AAATGAAGAA ACAATATGAA GAAGGGTTAC TACAAAAGAT TAAAGAAAAT
1a_Thai    GAATTGCTAA AAATGAAGAA ACAATATGAA GAAGGGTTAC TACAAAAGAT TAAGGAAAAT
Conservation **.*
.....|.....| .....|.....| .....|.....| .....|.....| .....|.....|
    5165      5175      5185      5195      5205      5215
1a_SalI    GCGGATAAGA GGAAGAGTAA TTTCGAATTA GTAAGAAGCG AAATAAACGC CTTGCTGGAT
1a_Thai    GCGGATAAGA GGAAGAGTAA TTTCGAATTA GTAAGAAGCG AAATAAACGC CTTGCTGGAT
Conservation *****
.....|.....| .....|.....| .....|.....| .....|.....| .....|.....|
    5225      5235      5245      5255      5265      5275
1a_SalI    CCAAGCACGT CTATTTTTAT TAAATTAAAA TTAAAGGAAT ATGACATGAC CGGCGATTTA
1a_Thai    CCAAGCACGT CTATTTTTAT TAAATTAAAA TTAAAGGAAT ATGACATGAC CGGCGATTTA
Conservation *****
.....|.....| .....|.....| .....|.....| .....|.....| .....|.....|
    5285      5295      5305      5315      5325      5335
1a_SalI    AAAAAATTACG CTGTTAAAAT GAATGAAATT CATGGTGAAT TTACCAAATC GTACAATTTG
1a_Thai    AAAAAATTACG CTGTTAAAAT GAATGAAATT CATGGTGAAT TTACCAAATC GTACAATTTG
Conservation *****
.....|.....| .....|.....| .....|.....| .....|.....| .....|.....|
    5345      5355      5365      5375      5385      5395
1a_SalI    ATAGAAAACCC ATTTGTCCAA TGCTACAGAT TATTCTGTGA CGTTTGAGAA GGCCCAAAGT
1a_Thai    ATAGAAAACCC ATTTGTCCAA TGCTACAGAT TATTCTGTGA CGTTTGAGAA GGCCCAAAGT
Conservation *****
.....|.....| .....|.....| .....|.....| .....|.....| .....|.....|
    5405      5415      5425      5435      5445      5455
1a_SalI    TTAAGGGAAC TAGCAGAGAA GGAAGAAGAA CATCTCAGAA GAAGAGAGGA GGAAGCGATC
1a_Thai    TTAAGGGAAC TAGCAGAGAA GGAAGAAGAA CATCTCAGAA GAAGAGAGGA GGAAGCGATC
Conservation *****
.....|.....| .....|.....| .....|.....| .....|.....| .....|.....|
    5465      5475      5485      5495      5505      5515
1a_SalI    AAAGTGTGTA ATGATATTAA AAAGGTGGAA TCGTTAAAAC TGCTAAAAGA AATGATGAAA
1a_Thai    AAAGTGTGTA ATGATATTAA AAAGGTGGAA TCGTTAAAAC TGCTAAAAGA AATGATGAAA
Conservation *****

```

|              |            |            |            |            |             |             |
|--------------|------------|------------|------------|------------|-------------|-------------|
|              | .... ....  | .... ....  | .... ....  | .... ....  | .... ....   | .... ....   |
|              | 5525       | 5535       | 5545       | 5555       | 5565        | 5575        |
| 1a_SalI      | AAGGTGAGTG | CCGAATATGA | AGGTATGAAA | AGAGACCATA | CGAGTGTTAG  | TCAGCTTGTA  |
| 1a_Thai      | AAGGTGAGTG | CCGAATATGA | AGGTATGAAA | AGAGACCATA | CGAGTGTTAG  | TCAGCTTGTA  |
| Conservation | *****      | *****      | *****      | *****      | *****       | *****       |
|              | .... ....  | .... ....  | .... ....  | .... ....  | .... ....   | .... ....   |
|              | 5585       | 5595       | 5605       | 5615       | 5625        | 5635        |
| 1a_SalI      | CAGGATATGA | AGACAATTGT | TGATGAGCTG | AAAACACTGA | ATGATATAAG  | CGAATGTTTCG |
| 1a_Thai      | CAGGATATGA | AGACAATTGT | TGATGAGCTG | AAAACACTGA | ATGATATAAG  | CGAATGTTTCG |
| Conservation | *****      | *****      | *****      | *****      | *****       | *****       |
|              | .... ....  | .... ....  | .... ....  | .... ....  | .... ....   | .... ....   |
|              | 5645       | 5655       | 5665       | 5675       | 5685        | 5695        |
| 1a_SalI      | AGCGTGCTAA | ACAATGTAGT | TAGTATAGTT | AAAAAGGTTA | AAGAGTCGAA  | ACATGCAGAC  |
| 1a_Thai      | AGCGTGCTAA | ACAATGTAGT | TAGTATAGTT | AAAAAGGTTA | AAGAGTCGAA  | ACATGCAGAC  |
| Conservation | *****      | *****      | *****      | *****      | *****       | *****       |
|              | .... ....  | .... ....  | .... ....  | .... ....  | .... ....   | .... ....   |
|              | 5705       | 5715       | 5725       | 5735       | 5745        | 5755        |
| 1a_SalI      | TATAAGAGAG | ACGCGAATAG | CATGTATGAA | AGTATGGTAA | CTCTGGCAAA  | TTATTTCCCTA |
| 1a_Thai      | TATAAGAGAG | ACGCGAATAG | CATGTATGAA | AGTATGGTAA | CTCTGGCAAA  | TTATTTCCCTA |
| Conservation | *****      | *****      | *****      | *****      | *****       | *****       |
|              | .... ....  | .... ....  | .... ....  | .... ....  | .... ....   | .... ....   |
|              | 5765       | 5775       | 5785       | 5795       | 5805        | 5815        |
| 1a_SalI      | AGCGATGAGG | CTAAAATTTC | ATCAGGAATG | GAATTCAATG | CGGAAATGAA  | ATCCAATTTT  |
| 1a_Thai      | AGCGATGAGG | CTAAAATTTC | ATCAGGAATG | GAATTCAATG | CGGAAATGAA  | ATCCAATTTT  |
| Conservation | *****      | *****      | *****      | *****      | *****       | *****       |
|              | .... ....  | .... ....  | .... ....  | .... ....  | .... ....   | .... ....   |
|              | 5825       | 5835       | 5845       | 5855       | 5865        | 5875        |
| 1a_SalI      | AAGACAGACT | TAGAGTTGGA | GATCTTTTCG | GTAATATCCA | ATTCGAATGA  | ACTTTTAAAA  |
| 1a_Thai      | AAGACAGACT | TAGAGTTGGA | GATCTTTTCG | GTAATATCCA | ATTCGAATGA  | ACTTTTAAAA  |
| Conservation | *****      | *****      | *****      | *****      | *****       | *****       |
|              | .... ....  | .... ....  | .... ....  | .... ....  | .... ....   | .... ....   |
|              | 5885       | 5895       | 5905       | 5915       | 5925        | 5935        |
| 1a_SalI      | AAAATAGAAC | AGGATTCAAA | TGATGTAATA | CAAAGGAAA  | GAGAAAAGTGA | ACAGCTAGCT  |
| 1a_Thai      | AAAATAGAAC | AGGATTCAAA | TGATGTAATA | CAAAGGAAA  | GAGAAAAGTGA | ACAGCTAGCT  |
| Conservation | *****      | *****      | *****      | *****      | *****       | *****       |
|              | .... ....  | .... ....  | .... ....  | .... ....  | .... ....   | .... ....   |
|              | 5945       | 5955       | 5965       | 5975       | 5985        | 5995        |
| 1a_SalI      | AAGGATGCCA | CTGATATTTA | TAATGTGATA | AAACTAAAAA | ATGAATTTAA  | CGAAAAGTTG  |
| 1a_Thai      | AAGGATGCCA | CTGATATTTA | TAATGTGATA | AAACTAAAAA | ATGAATTTAA  | CGAAAAGTTG  |
| Conservation | *****      | *****      | *****      | *****      | *****       | *****       |
|              | .... ....  | .... ....  | .... ....  | .... ....  | .... ....   | .... ....   |
|              | 6005       | 6015       | 6025       | 6035       | 6045        | 6055        |
| 1a_SalI      | GAAGAAGCCA | AGAACAAAGA | AGAGGTCGTT | TCGGAAAAGG | TAAGGGAAGC  | ATTGAAGAGA  |
| 1a_Thai      | GAAGAAGCCA | AGAACAAAGA | AGAGGTCGTT | TCGGAAAAGG | TAAGGGAAGC  | ATTGAAGAGA  |
| Conservation | *****      | *****      | *****      | *****      | *****       | *****       |
|              | .... ....  | .... ....  | .... ....  | .... ....  | .... ....   | .... ....   |
|              | 6065       | 6075       | 6085       | 6095       | 6105        | 6115        |
| 1a_SalI      | CTGAGTCAAG | TGGAAGGAAT | AAGATGCCAC | TTTGAAAATT | TCCATAGGTT  | ACTAGACAAT  |
| 1a_Thai      | CTGAGTCAAG | TGGAAGGAAT | AAGATGCCAC | TTTGAAAATT | TCCATAGGTT  | ACTAGACAAT  |
| Conservation | *****      | *****      | *****      | *****      | *****       | *****       |

|              |            |            |             |            |            |             |
|--------------|------------|------------|-------------|------------|------------|-------------|
|              | .... ....  | .... ....  | .... ....   | .... ....  | .... ....  | .... ....   |
|              | 6125       | 6135       | 6145        | 6155       | 6165       | 6175        |
| 1a_SalI      | ACAGAGGAGC | TTGAAAATTT | AAAAAAAAATG | GTTACCATCT | ACCGGGATAA | GAAAAGCGAA  |
| 1a_Thai      | ACAGAGGAGC | TTGAAAATTT | AAAAAAAAATG | GTTACCATCT | ACCGGGATAA | GAAAAGCGAA  |
| Conservation | *****      | *****      | *****       | *****      | *****      | *****       |
|              |            |            |             |            |            |             |
|              | .... ....  | .... ....  | .... ....   | .... ....  | .... ....  | .... ....   |
|              | 6185       | 6195       | 6205        | 6215       | 6225       | 6235        |
| 1a_SalI      | GCGCCGAAAG | AATCAGGGTT | GCAAGAAATG  | GAGAACGAAA | TGAACACCTA | TAGTAACTCC  |
| 1a_Thai      | GCGCCGAAAG | AATCAGGGTT | GCAAGAAATG  | GAGAACGAAA | TGAACACCTA | TAGTAACTCC  |
| Conservation | *****      | *****      | *****       | *****      | *****      | *****       |
|              |            |            |             |            |            |             |
|              | .... ....  | .... ....  | .... ....   | .... ....  | .... ....  | .... ....   |
|              | 6245       | 6255       | 6265        | 6275       | 6285       | 6295        |
| 1a_SalI      | ATAACACAGT | TAGAAGGAAT | AGTCGTATCA  | GCCGGGGAAT | CCAAAGAAGA | CATTGAAAAA  |
| 1a_Thai      | ATAACACAGT | TAGAAGGAAT | AGTCGTATCA  | GCCGGGGAAT | CCAAAGAAGA | CATTGAAAAA  |
| Conservation | *****      | *****      | *****       | *****      | *****      | *****       |
|              |            |            |             |            |            |             |
|              | .... ....  | .... ....  | .... ....   | .... ....  | .... ....  | .... ....   |
|              | 6305       | 6315       | 6325        | 6335       | 6345       | 6355        |
| 1a_SalI      | TTGGAAGAT  | CCAATGAAGA | AATGAGAAAT  | ATTAGCGAAA | AGATAAGCAC | AATAGATTCCG |
| 1a_Thai      | TTGGAAGAT  | CCAATGAAGA | AATGAGAAAT  | ATTAGCGAAA | AGATAAGCAC | AATAGATTCCG |
| Conservation | *****      | *****      | *****       | *****      | *****      | *****       |
|              |            |            |             |            |            |             |
|              | .... ....  | .... ....  | .... ....   | .... ....  | .... ....  | .... ....   |
|              | 6365       | 6375       | 6385        | 6395       | 6405       | 6415        |
| 1a_SalI      | AAGGTTATCG | AAATGAACTC | AACTATTGAT  | GAGTTGTACA | AATTGGGAAA | AAACTGTCAG  |
| 1a_Thai      | AAGGTTATCG | AAATGAACTC | AACTATTGAT  | GAGTTGTACA | AATTGGGAAA | AAACTGTCAG  |
| Conservation | *****      | *****      | *****       | *****      | *****      | *****       |
|              |            |            |             |            |            |             |
|              | .... ....  | .... ....  | .... ....   | .... ....  | .... ....  | .... ....   |
|              | 6425       | 6435       | 6445        | 6455       | 6465       | 6475        |
| 1a_SalI      | GCCCACTGGA | TTTCCCTGAT | CAGTTATACT  | GCGAATATGA | AAACGTCCAA | AAAGTTAATA  |
| 1a_Thai      | GCCCACTGGA | TTTCCCTGAT | CAGTTATACT  | GCGAATATGA | AAACGTCCAA | AAAGTTAATA  |
| Conservation | *****      | *****      | *****       | *****      | *****      | *****       |
|              |            |            |             |            |            |             |
|              | .... ....  | .... ....  | .... ....   | .... ....  | .... ....  | .... ....   |
|              | 6485       | 6495       | 6505        | 6515       | 6525       | 6535        |
| 1a_SalI      | ATGATTAATA | AAGAAAAGGA | GAACACGGAA  | AAGTGTGTAG | ACTACATTAA | AGACAATTCCG |
| 1a_Thai      | ATGATTAATA | AAGAAAAGGA | GAACACGGAA  | AAGTGTGTAG | ACTACATTAA | AGACAATTCCG |
| Conservation | *****      | *****      | *****       | *****      | *****      | *****       |
|              |            |            |             |            |            |             |
|              | .... ....  | .... ....  | .... ....   | .... ....  | .... ....  | .... ....   |
|              | 6545       | 6555       | 6565        | 6575       | 6585       | 6595        |
| 1a_SalI      | TCCTCCACAG | ACGGTTATGT | CGAAACGTTG  | AAAGGGTTTT | ACGGTAGTAA | GCTTACATTT  |
| 1a_Thai      | TCCTCCACAG | ACGGTTATGT | CGAAACGTTG  | AAAGGGTTTT | ACGGTAGTAA | GCTTACATTT  |
| Conservation | *****      | *****      | *****       | *****      | *****      | *****       |
|              |            |            |             |            |            |             |
|              | .... ....  | .... ....  | .... ....   | .... ....  | .... ....  | .... ....   |
|              | 6605       | 6615       | 6625        | 6635       | 6645       | 6655        |
| 1a_SalI      | AGCAGCGCAT | CCGAAATTGT | GCAAAATGCA  | GACACATATT | CCGTGAATTT | TGCGAAACAC  |
| 1a_Thai      | AGCAGCGCAT | CCGAAATTGT | GCAAAATGCA  | GACACATATT | CCGTGAATTT | TGCGAAACAC  |
| Conservation | *****      | *****      | *****       | *****      | *****      | *****       |
|              |            |            |             |            |            |             |
|              | .... ....  | .... ....  | .... ....   | .... ....  | .... ....  | .... ....   |
|              | 6665       | 6675       | 6685        | 6695       | 6705       | 6715        |
| 1a_SalI      | GAAAAGGAGT | CTTTAAATGC | GATAAGGGAT  | ATAAAAAAGG | AATTATATTT | ATTCCACCAA  |
| 1a_Thai      | GAAAAGGAGT | CTTTAAATGC | GATAAGGGAT  | ATAAAAAAGG | AATTATATTT | ATTCCACCAA  |
| Conservation | *****      | *****      | *****       | *****      | *****      | *****       |

|              |            |            |            |             |            |            |
|--------------|------------|------------|------------|-------------|------------|------------|
|              | .... ....  | .... ....  | .... ....  | .... ....   | .... ....  | .... ....  |
|              | 6725       | 6735       | 6745       | 6755        | 6765       | 6775       |
| 1a_SalI      | AATAGCGATA | TTAGCATTGT | AGAGGGAGGC | GTCCAAAATG  | TGCTGGCACT | TTATGATAAG |
| 1a_Thai      | AATAGCGATA | TTAGCATTGT | AGAGGGAGGC | GTCCAAAATG  | TGCTGGCACT | TTATGATAAG |
| Conservation | *****      | *****      | *****      | *****       | *****      | *****      |
|              |            |            |            |             |            |            |
|              | .... ....  | .... ....  | .... ....  | .... ....   | .... ....  | .... ....  |
|              | 6785       | 6795       | 6805       | 6815        | 6825       | 6835       |
| 1a_SalI      | CTGAACGAGG | AAAAAAGAGA | AATGGATGAA | CTGTACAGAA  | ATATAAGTGA | AACTAAGCTG |
| 1a_Thai      | CTGAACGAGG | AAAAAAGAGA | AATGGATGAA | CTGTACAGAA  | ATATAAGTGA | AACTAAGCTG |
| Conservation | *****      | *****      | *****      | *****       | *****      | *****      |
|              |            |            |            |             |            |            |
|              | .... ....  | .... ....  | .... ....  | .... ....   | .... ....  | .... ....  |
|              | 6845       | 6855       | 6865       | 6875        | 6885       | 6895       |
| 1a_SalI      | AAGCAAATGG | AACACAGCAC | TGACGTGTTT | AAGCCCATGA  | TAGAATTACA | CAAAGGAATG |
| 1a_Thai      | AAGCAAATGG | AACACAGCAC | TGACGTGTTT | AAGCCCTTGA  | TAGAATTACA | CAAAGGATTG |
| Conservation | *****      | *****      | *****      | *****:***   | *****      | *****:***  |
|              |            |            |            |             |            |            |
|              | .... ....  | .... ....  | .... ....  | .... ....   | .... ....  | .... ....  |
|              | 6905       | 6915       | 6925       | 6935        | 6945       | 6955       |
| 1a_SalI      | AATGAAACGA | ATAATAAGTC | TTTGCTGGAG | AAAGAAAAGA  | AACTAAAAAG | CGTGAACGAC |
| 1a_Thai      | ATTGAAACGA | ATAATAAGTC | TTTGCTGGAG | AAAGAAAANGA | ACTTAAAAAG | CGTGAACGAC |
| Conservation | *:*****    | *****      | *****      | ***** **    | *.*****    | *****      |
|              |            |            |            |             |            |            |
|              | .... ....  | .... ....  | .... ....  | .... ....   | .... ....  | .... ....  |
|              | 6965       | 6975       | 6985       | 6995        | 7005       | 7015       |
| 1a_SalI      | AATATGCACA | GTATGGAAGC | TGAGATGATT | AAAAATGGCC  | TTAAATACAC | CCCAGAAAGT |
| 1a_Thai      | AATATGCACA | GTATGGAAGC | TGAGATGATT | AAAAATGGCC  | TTAAATACAC | CCCAGAAAGT |
| Conservation | *****      | *****      | *****      | *****       | *****      | *****      |
|              |            |            |            |             |            |            |
|              | .... ....  | .... ....  | .... ....  | .... ....   | .... ....  | .... ....  |
|              | 7025       | 7035       | 7045       | 7055        | 7065       | 7075       |
| 1a_SalI      | GTGCAAAATA | TTAACAACAT | ATACAGCGTT | ATTGAAGCTG  | AGGTGAAAAC | GCTGGAAGAA |
| 1a_Thai      | GTGCAAAATA | TTAACAACAT | ATACAGCGTT | ATTGAAGCTG  | AGGTGAAAAC | GCTGGAAGAA |
| Conservation | *****      | *****      | *****      | *****       | *****      | *****      |
|              |            |            |            |             |            |            |
|              | .... ....  | .... ....  | .... ....  | .... ....   | .... ....  | .... ....  |
|              | 7085       | 7095       | 7105       | 7115        | 7125       | 7135       |
| 1a_SalI      | ATTGACCGTG | ATTATGGCGA | TAATTACCAA | ATCGTGGAAG  | AGCACAAGAA | GCAATTTTCC |
| 1a_Thai      | ATTGACCGTG | ATTATGGCGA | TAATTACCAA | ATCGTGGAAG  | AGCACAAGAA | GCAATTTTCC |
| Conservation | *****      | *****      | *****      | *****       | *****      | *****      |
|              |            |            |            |             |            |            |
|              | .... ....  | .... ....  | .... ....  | .... ....   | .... ....  | .... ....  |
|              | 7145       | 7155       | 7165       | 7175        | 7185       | 7195       |
| 1a_SalI      | ATTTTAATCG | ACAGAACGAA | CGCGCTAATG | GATGACATTG  | AAATTTTTAA | AAAGGAAAAC |
| 1a_Thai      | ATTTTAATCG | ACAGAACGAA | CGCGCTAATG | GATGACATTG  | AAATTTTTAA | AAAGGAAAAC |
| Conservation | *****      | *****      | *****      | *****       | *****      | *****      |
|              |            |            |            |             |            |            |
|              | .... ....  | .... ....  | .... ....  | .... ....   | .... ....  | .... ....  |
|              | 7205       | 7215       | 7225       | 7235        | 7245       | 7255       |
| 1a_SalI      | AATTACAATT | TAATGGAAGT | AAACACAGAA | ACGATACACA  | GAGTAAACGA | TTATATAGAA |
| 1a_Thai      | AATTACAATT | TAATGGAAGT | AAACACAGAA | ACCATACACA  | GAGTAAACGA | TTATATAGAA |
| Conservation | *****      | *****      | *****      | ** *****    | *****      | *****      |
|              |            |            |            |             |            |            |
|              | .... ....  | .... ....  | .... ....  | .... ....   | .... ....  | .... ....  |
|              | 7265       | 7275       | 7285       | 7295        | 7305       | 7315       |
| 1a_SalI      | AAGATCACCA | ATAAGTTAGT | ACAAGCCAAA | ACGGAGTATG  | AACAGATCCT | GGAAAATATA |
| 1a_Thai      | AAGATCACCA | ATAAGTTAGT | ACAAGCCAAA | ACGGAGTATG  | AACAGATCCT | GGAAAATATA |
| Conservation | *****      | *****      | *****      | *****       | *****      | *****      |

```

      ....|....| ....|....| ....|....| ....|....| ....|....|
      7325      7335      7345      7355      7365      7375
1a_SalI AAACAAAACG ATGATATGCT ACAGAATATT TTTCTCAAAA AAGTAAGTAT TATCGAATAC
1a_Thai AAACAAAACG ATGATATGCT ACAGAATATT TTTCTCAAAA AAGTAAGTAT TATCGAATAC
Conservation *****
      ....|....| ....|....| ....|....| ....|....| ....|....|
      7385      7395      7405      7415      7425      7435
1a_SalI TTTGAAAACG TAAAGAAGAA AAAAGAATCT ATATTGAACG ATTTATATGA ACAGGAAAGG
1a_Thai TTTGAAAACG TAAAGAAGAA AAAAGAATCT ATATTGAACG ATTTATATGA ACAGGAAAGG
Conservation *****
      ....|....| ....|....| ....|....| ....|....| ....|....|
      7445      7455      7465      7475      7485      7495
1a_SalI CTGCTCAAAA TAGGGGAACA CTTAGATGAG ATTAAGCGTA ACGTGACAGA GACACTGAGT
1a_Thai CTGCTCAAAA TAGGGGAACA CTTAGATGAG ATTAAGCGTA ACGTGACAGA GACACTGAGT
Conservation *****
      ....|....| ....|....| ....|....| ....|....| ....|....|
      7505      7515      7525      7535      7545      7555
1a_SalI AGTTATGAAA TTGATCAAAA AATGGAAATG ATGTCTAAAA ACCTTCTAGA GAAAAAAGC
1a_Thai AGTTATGAAA TTGATCAAAA AATGGAAATG ATGTCTAAAA ACCTTCTAGA GAAAAAATC
Conservation *****
      ....|....| ....|....| ....|....| ....|....| ....|....|
      7565      7575      7585      7595      7605      7615
1a_SalI AAAATGATGA ATTACACTTC CATTATGAG TTGGAGAGAG AAGCGAACGA AATAAACAGG
1a_Thai AAAATGATGA ATTACACTTC CATTATGAG TTGGAGAGAG AAGCGAACGA AATAAACAGG
Conservation *****
      ....|....| ....|....| ....|....| ....|....| ....|....|
      7625      7635      7645      7655      7665      7675
1a_SalI GATGCTAAAC AAATAAAAAG TGATGATACA ATACTTAATA GTGTTTTAGA AGCTGCCATT
1a_Thai GATGCTAAAC AAATAAAAAG TGATGATACA ATACTTAATA GTGTTTTAGA AGCTGCCATT
Conservation *****
      ....|....| ....|....| ....|....| ....|....| ....|....|
      7685      7695      7705      7715      7725      7735
1a_SalI CAGAAGAGGG GAGATATGGA CGCGATCTTC AGTCAGATGT CTGCAGATAG AAATCCAAAT
1a_Thai CAGAAGAGGG GAGATATGGA CGCGATCTTC AGTCAGATGT CTGCAGATAG AAATCCAAAT
Conservation *****
      ....|....| ....|....| ....|....| ....|....| ....|....|
      7745      7755      7765      7775      7785      7795
1a_SalI GAATATAAAT CTGCAGAGAA GTACATGAAT GAAGCGAATG AAATAATTTC CCAATTAGAA
1a_Thai GAATATAAAT CTGCAGAGAA GTACATGAAT GAAGCGAATG AAATAATTTC CCAATTAGAA
Conservation *****
      ....|....| ....|....| ....|....| ....|....| ....|....|
      7805      7815      7825      7835      7845      7855
1a_SalI GTAAAGCTTC GAGAAATAGG CCAACTAGTA CAGGATAGTG AAAGCATATT ATCAGAAATG
1a_Thai GTAAAGCTTC GAGAAATAGG CCAACTAGTA CAGGATAGTG AAAGCATATT ATCAGAAATG
Conservation *****
      ....|....| ....|....| ....|....| ....|....| ....|....|
      7865      7875      7885      7895      7905      7915
1a_SalI AATTCTAAAA AGAGCGCTAT AGAAAAGGAA AAGACAGCTA GGGCTTTGAG AACTAGTGAA
1a_Thai AATTCTAAAA AGAGCGCTAT AGAAAAGGAA AAGACAGCTA GGGCTTTGAG AACTAGTGAA
Conservation *****

```

```

      ....|....| ....|....| ....|....| ....|....| ....|....| ....|....|
      7925      7935      7945      7955      7965      7975
1a_SalI  AATAATAGAA GAGAAGAGGA AGAAAGGGCA CGTGTGCAAG AAATGAGCAT GAATAATGAT
1a_Thai  AATAATAGAA GAGAAGAGGA AGAAAGGGCA CGTGTGCAAG AAATGAGCAT GAATAATGAT
Conservation *****
      ....|....| ....|....| ....|....| ....|....| ....|....| ....|....|
      7985      7995      8005      8015      8025      8035
1a_SalI  CCCACGCAAA GTGAAACAAC TCATTGCGAG GGATCCATCG GTGAAGGAAA AGAATCAGAC
1a_Thai  CCCACGCAAA GTGAAACAAC TCATTGCGAG GGATCCATCG GTGAAGGAAA AGAATCAGAC
Conservation *****
      ....|....| ....|....| ....|....| ....|....| ....|....| ....|....|
      8045      8055      8065      8075      8085      8095
1a_SalI  TCGGATGAAA CAGGTTTAAAC ACACGATGCA GGTGCAGATG AAGATTCTAC TAGCTCGGCA
1a_Thai  TCGGATGAAA CAGGTTTAAAC ACACGATGCA GGTGCAGATG AAGATTCTAC TAGCTCGGCA
Conservation *****
      ....|....| ....|....| ....|....| ....|....| ....|....| ....|....|
      8105      8115      8125      8135      8145      8155
1a_SalI  AAAGGGGCAC ATGAATTAGA AGAGGAGGAA ACTACAGCAC CTATGGAAGA AACCGAGATG
1a_Thai  AAAGGGGCAC ATGAATTAGA AGAGGAGGAA ACTACAGCAC CTATGGAAGA AACCGAGATG
Conservation *****
      ....|....| ....|....| ....|....| ....|....| ....|....| ....|....|
      8165      8175      8185      8195      8205      8215
1a_SalI  AATGACAATA CCCTTCTAGG GTATGACACT ACCAGAAGTG ATGAACCTGA TATGCATACA
1a_Thai  AATGACAATA CCCTTCTAGG GTATGACACT ACCAGAAGTG ATGAACCTGA TATGCATACA
Conservation *****
      ....|....| ....|....| ....|....| ....|....| ....|....| ....|....|
      8225      8235      8245      8255      8265      8275
1a_SalI  GAGAACACCC AGGATGGTAC CTATCAGGAT ACGTCAAATT CCAGCGATGA AGCAGATATT
1a_Thai  GAGAACACCC AGGATGGTAC CTATCAGGAT ACGTCAAATT CCAGCGATGA AGCAGATATT
Conservation *****
      ....|....| ....|....| ....|....| ....|....| ....|....| ....|....|
      8285      8295      8305      8315      8325      8335
1a_SalI  TTGAACGGCA AGTTCAATTT TAATAATGTC AAATATGCAG GAGCATTCGT TTTACTGTGT
1a_Thai  TTGAACGGCA AGTTCAATTT TAATAATGTC AAATATGCAG GAGCATTCGT TTTACTGTGT
Conservation *****
      ....|....| ....|....| ....|....| ....|....| ....|....| ....|....|
      8345      8355      8365      8375      8385      8395
1a_SalI  ACGAGCGCAG TTATAGGGGC TATTATAGCA CATAAGAAAAG ATGACCAAGA GGAGCTTAAT
1a_Thai  ACGAGCGCAG TTATAGGGGC TATTATAGCA CATAAGAAAAG ATGACCAAGA GGAGCTTAAT
Conservation *****
      ....|....| ....|....| ....|....| ....|....| ....|....| ....|....|
      8405      8415      8425      8435      8445      8455
1a_SalI  AATGGCGTGG AAGACGATAG GGTGTTTGAA GTTAAAAAGA GCATGAACCC AGAAAACAAA
1a_Thai  AATGGCGTGG AAGACGATAG GGTGTTTGAA GTTAAAAAGA GCATGAACCC AGAAAACAAA
Conservation *****
      ....|....| ....|....| ....|....| ....|....| ..
      8465      8475      8485      8495
1a_SalI  GAAGAAATCA TTGATGTTTC TTTTGTGAT ATTGAGTATT AA
1a_Thai  GAAGAAATCA TTGATGTTTC TTTTGTGAT ATTGAGTATT AA
Conservation ***** **

```

**Alignment: Pvrpb1b**

```

      ....|.....| ....|.....| ....|.....| ....|.....| ....|.....| ....|.....|
      5          15         25         35         45         55
1b_SalI  ATGAAGAAGC CAATTTTATG GACAGCCCTC TTTGGTCTAT GGCTTGCATC TCTTGATTTA
1b_Thai  ATGAAGAAGC CAATTTATAG GACAGCCCTC TTTGGTCTAT GGCTTGCATC TCTTGATTTA
Conservation *****:*****

      ....|.....| ....|.....| ....|.....| ....|.....| ....|.....|
      65         75         85         95        105        115
1b_SalI  AATCGAGGGA AAAACACGTT GCATAATATA AAGAAACATT TTGAAGACTC GAAATTTTTA
1b_Thai  AATCGAGGGA AAAACACGTT GCATAATATA AAGAAACATT TTGAAGACTC GAAATTTTTA
Conservation *****:*****

      ....|.....| ....|.....| ....|.....| ....|.....| ....|.....|
      125        135        145        155        165        175
1b_SalI  TCATTCGATC CGAATTTGAA GAGAAACAAA AAGTTCAAGC ATAAGGACGT GAAAAAGAAG
1b_Thai  TCATTCGATC CGAATTTGAA GAGAAACAAA AAGTTCAAGC ATAAGGACGT GAAAAAGAAG
Conservation *****:*****

      ....|.....| ....|.....| ....|.....| ....|.....| ....|.....|
      185        195        205        215        225        235
1b_SalI  AGCTTTAAAA GTCTGGAAAC AGATAGTGTA CAGCAGTTTG ATAAAGAAAT TAGCAAAGTT
1b_Thai  AGCTTTAAAA GTCTGGAAAC AGATAGTGTA CAGCAGTTTG ATAAAGAAAT TAGCAAAGTT
Conservation *****:*****

      ....|.....| ....|.....| ....|.....| ....|.....| ....|.....|
      245        255        265        275        285        295
1b_SalI  AATAGGGAGG ACCCAACAGG AATAATCGAA TCTGATAGTG CTTCATTTAT AAGCTTAGGA
1b_Thai  AATAGGGAGG ACCCAACAGG AATAATCGAA TCTGATAGTG CTTCATTTAT AAGCTTAGGA
Conservation *****:*****

      ....|.....| ....|.....| ....|.....| ....|.....| ....|.....|
      305        315        325        335        345        355
1b_SalI  AATGCTAGTC TGAAAAATGA ACCCTCTGAC GGTGGTGGAG ATGAAGTGGT TTTAAGAACC
1b_Thai  AATGCTAGTC TGAAAAATGA ACCCTCTGAC GGTGGTGGAG ATGAAGTGGT TTTAAGAACC
Conservation *****:*****

      ....|.....| ....|.....| ....|.....| ....|.....| ....|.....|
      365        375        385        395        405        415
1b_SalI  GACGGAGGGG GTAGTGACAC CGATAAAGAT TCAGGCAAAT TGGAGAAAAG TGAATACCT
1b_Thai  GACGGAGGGG GTAGTGACAC CGATAATGAT TCAGGCAAAT TGGAGAAAAG TGAATACCT
Conservation *****:*****

      ....|.....| ....|.....| ....|.....| ....|.....| ....|.....|
      425        435        445        455        465        475
1b_SalI  GATGTGGAGA ACGCAGAATC GGTATCGAAA TATAAAATCG TTTTAGAAGA TTATGTAAAT
1b_Thai  GATGTGGAGA ACGCAGAATC GGTATCGAAA TATAAAATCG TTTTAGAAGA TTATGTAAAT
Conservation *****:*****

      ....|.....| ....|.....| ....|.....| ....|.....| ....|.....|
      485        495        505        515        525        535
1b_SalI  AAAGTAAAGG AATCTAATCC ATATTTCTTG ATGGAGGTTG ATTATGTTAA TCTGCAGTCT
1b_Thai  AAAGTAAAGG AATCTAATCC ATATTTCTTG ATGGAGGTTG ATTATGTTAA TCTGCAGTCT
Conservation *****:*****

      ....|.....| ....|.....| ....|.....| ....|.....| ....|.....|
      545        555        565        575        585        595
1b_SalI  TTTAAAGAAA TTAGGAACCT CATTCCAGAG GGGAAAGAAT ACCACAAGTT CTACGATGAG
1b_Thai  TTTAAAGAAA TTAGGAACCT CATTCCAGAG GGGAAAGAAT ACCACAAGTT CTACGATGAG
Conservation *****:*****

```



|              |            |            |            |            |            |            |
|--------------|------------|------------|------------|------------|------------|------------|
|              | 605        | 615        | 625        | 635        | 645        | 655        |
| 1b_SalI      | GAGATGGATA | AAAAAGTCAC | AGATTACACA | AATAGATTAG | ACGCACTGAT | GAAAAAGTTC |
| 1b_Thai      | GAGATGGATA | AAAAAGTCAC | AGATTACACA | AATAGATTAG | ACGCACTGAT | GAAAAAGTTC |
| Conservation | *****      | *****      | *****      | *****      | *****      | *****      |
|              | .... ....  | .... ....  | .... ....  | .... ....  | .... ....  | .... ....  |
|              | 665        | 675        | 685        | 695        | 705        | 715        |
| 1b_SalI      | ATTGGAGCGA | AAAATGAAAT | GATAAAAATG | GATGCTATCG | TAAAAATTCA | TAAAAAGGGT |
| 1b_Thai      | ATTGGAGCGA | AAAATGAAAT | GATAAAAATG | GATGCTATCG | TAAAAATTCA | TAAAAAGGGT |
| Conservation | *****      | *****      | *****      | *****      | *****      | *****      |
|              | .... ....  | .... ....  | .... ....  | .... ....  | .... ....  | .... ....  |
|              | 725        | 735        | 745        | 755        | 765        | 775        |
| 1b_SalI      | TCTACCGAAT | TGAAGCAAGA | AGCTGAAAAT | GTAAAAAAT  | TAGAATTAGC | AAAGGAGCAA |
| 1b_Thai      | TCTACCGAAT | TGAAGCAAGA | AGCTGAAAAT | GTAAAAAAT  | TAGAATTAGC | AAAGGAGCAA |
| Conservation | *****      | *****      | *****      | *****      | *****      | *****      |
|              | .... ....  | .... ....  | .... ....  | .... ....  | .... ....  | .... ....  |
|              | 785        | 795        | 805        | 815        | 825        | 835        |
| 1b_SalI      | TATGAAAAGT | ACATGAAAGA | GTATAATGAT | GATATAAAAC | CTATTGTACA | TGAAATTAGA |
| 1b_Thai      | TATGAAAAGT | ACATGAAAGA | GTATAATGAT | GATATAAAAC | CTATTGTACA | TGAAATTAGA |
| Conservation | *****      | *****      | *****      | *****      | *****      | *****      |
|              | .... ....  | .... ....  | .... ....  | .... ....  | .... ....  | .... ....  |
|              | 845        | 855        | 865        | 875        | 885        | 895        |
| 1b_SalI      | AACAAGGCAT | ATGAGCATTT | GAAGCAATCC | AGCTGCACGC | ACCAGTGTA  | TGCTTACATT |
| 1b_Thai      | AACAAGGCAT | ATGAGCATTT | GAAGCAATCC | AGCTGCACGC | ACCAGTGTA  | TGCTTACATT |
| Conservation | *****      | *****      | *****      | *****      | *****      | *****      |
|              | .... ....  | .... ....  | .... ....  | .... ....  | .... ....  | .... ....  |
|              | 905        | 915        | 925        | 935        | 945        | 955        |
| 1b_SalI      | ATGAATTATG | CTCGTCTTCT | TAACAAATAT | ATAAAGAACA | TTTCAGAGAC | TACGGACGAG |
| 1b_Thai      | ATGAATTATG | CTCGTCTTCT | TAACAAATAT | ATAAAGAACA | TTTCAGAGAC | TACGGACGAG |
| Conservation | *****      | *****      | *****      | *****      | *****      | *****      |
|              | .... ....  | .... ....  | .... ....  | .... ....  | .... ....  | .... ....  |
|              | 965        | 975        | 985        | 995        | 1005       | 1015       |
| 1b_SalI      | TCAGTTGTCA | CTATCGTTAA | AAGTATTAAC | GATTATAATT | CTCTGGACAA | AATATTAGAA |
| 1b_Thai      | TCAGTTGTCA | CTATCGTTAA | AAGTATTAAC | GATTATAATT | CTCTGGACAA | AATATTAGAA |
| Conservation | *****      | *****      | *****      | *****      | *****      | *****      |
|              | .... ....  | .... ....  | .... ....  | .... ....  | .... ....  | .... ....  |
|              | 1025       | 1035       | 1045       | 1055       | 1065       | 1075       |
| 1b_SalI      | CTTGCAGAAA | GGGAGAATAT | AGACATTGCA | GAAAATGTCT | ACCTTTTGAA | GTTACTAGGA |
| 1b_Thai      | CTTGCAGAAA | GGGAGAATAT | AGACATTGCA | GAAAATGTCT | ACCTTTTGAA | GTTACTAGGA |
| Conservation | *****      | *****      | *****      | *****      | *****      | *****      |
|              | .... ....  | .... ....  | .... ....  | .... ....  | .... ....  | .... ....  |
|              | 1085       | 1095       | 1105       | 1115       | 1125       | 1135       |
| 1b_SalI      | GAAGAAGTAA | ATGACCTTAA | CTATGTGTAT | GTGATAAACA | GATCGCTAAT | AAATGACGCG |
| 1b_Thai      | GAAGAAGTAA | ATGACCTTAA | CTATGTGTAT | GTGATAAACA | GATCGCTAAT | AAATGACGCG |
| Conservation | *****      | *****      | *****      | *****      | *****      | *****      |
|              | .... ....  | .... ....  | .... ....  | .... ....  | .... ....  | .... ....  |
|              | 1145       | 1155       | 1165       | 1175       | 1185       | 1195       |
| 1b_SalI      | AATAAAGTTC | TGATGGACAT | AAAGGAAAAT | GGGATTTTAT | TTCATACGAA | GGAGGATAAA |
| 1b_Thai      | AATAAAGTTC | TGATGGACAT | AAAGGAAAAT | GGGATTTTAT | TTCATACGAA | GGAGGATAAA |
| Conservation | *****      | *****      | *****      | *****      | *****      | *****      |
|              | .... ....  | .... ....  | .... ....  | .... ....  | .... ....  | .... ....  |
|              | 1205       | 1215       | 1225       | 1235       | 1245       | 1255       |
| 1b_SalI      | ATTGTAAACA | GTACAAAGGA | ACTAATCAAC | AACTATTGTG | TGTTTCACCA | TATAATGATT |
| 1b_Thai      | ATTGTAAACA | GTACAAAGGA | ACTAATCAAC | AACTATTGTG | TGTTTCACCA | TATAATGATT |

```

Conservation *****
          ....|....| ....|....| ....|....| ....|....| ....|....|
          1265     1275     1285     1295     1305     1315
1b_SalI  TTGAATGTTC CAATTAAGAA AATGTACGAA GAAAGGATAA AAAGGTCTAA CGATTTATTT
1b_Thai  TTGAATGTTC CAATTAAGAA AATGTACGAA GAAAGGATAA AAAGGTCTAA CGATTTATTT
Conservation *****

          ....|....| ....|....| ....|....| ....|....| ....|....|
          1325     1335     1345     1355     1365     1375
1b_SalI  TCTACAATTA TGGAAAAGTT AAAAGATGAA GCTCATAAAT TAATCAATTC TGTATTTGTC
1b_Thai  TCTACAATTA TGGAAAAGTT AAAAGATGAA GCTCATAAAT TAATCAATTC TGTATTTGTC
Conservation *****

          ....|....| ....|....| ....|....| ....|....| ....|....|
          1385     1395     1405     1415     1425     1435
1b_SalI  GAGGAGGAAA GTAATAAAAT TCTTAAGTCG TCAGAAGGAA TTGTCCAAAA TGCAGAAAAA
1b_Thai  GAGGAGGAAA GTAATAAAAT TCTTAAGTCG TCAGAAGGAA TTGTCCAAAA TGCAGAAAAA
Conservation *****

          ....|....| ....|....| ....|....| ....|....| ....|....|
          1445     1455     1465     1475     1485     1495
1b_SalI  ATACTTGAGG AAAATAAAAA AAAAAATAGAC TTTTTTAAAA GGTATCCAGA AATAAAAAACG
1b_Thai  ATACTTGAGG AAAATAAAAA AAAAAATAGAC TTTTTTAAAA GGTATCCAGA AATAAAAAACG
Conservation *****

          ....|....| ....|....| ....|....| ....|....| ....|....|
          1505     1515     1525     1535     1545     1555
1b_SalI  AAGCCTCCTA TGGAAGAATT ACAAACTGAG TTTAGTCAAC AAGAAGAAGC GAGGGGGGAA
1b_Thai  AAGCCTCCTA TGGAAGAATT ACAAACTGAG TTTAGTCAAC AAGAAGAAGC GAGGGGGGAA
Conservation *****

          ....|....| ....|....| ....|....| ....|....| ....|....|
          1565     1575     1585     1595     1605     1615
1b_SalI  ATATTAACA TGGCACAGCT AATCGATCAC TTATATAATA ATTTGTTTCA TGTGAACAAA
1b_Thai  ATATTAACA TGGCACAGCT AATCGATCAC TTATATAATA ATTTGTTTCA TGTGAACAAA
Conservation *****

          ....|....| ....|....| ....|....| ....|....| ....|....|
          1625     1635     1645     1655     1665     1675
1b_SalI  ACTAATCATT TAAATAAATT AAACGAAATA GTCAGTACG GGGATAGCAT AACAAAGGGA
1b_Thai  ACTAATCATT TAAATAAATT AAACGAAATA GTCAGTACG GGGATAGCAT AACAAAGGGA
Conservation *****

          ....|....| ....|....| ....|....| ....|....| ....|....|
          1685     1695     1705     1715     1725     1735
1b_SalI  AATTTACTGT TGGAAGAAAT TTCTGAAATT AATAAAGAGC GGAATGTTCT AAAGGTAAAT
1b_Thai  AATTTACTGT TGGAAGAAAT TTCTGAAATT AATAAAGAGC GGAATGTTCT AAAGGTAAAT
Conservation *****

          ....|....| ....|....| ....|....| ....|....| ....|....|
          1745     1755     1765     1775     1785     1795
1b_SalI  ATTGCTACTT TGAAAAATGT GCATGGGAAT TTGGTACGTT CGAAAAATAA CATTTGTTGAA
1b_Thai  ATTGCTACTT TGAAAAATGT GCATGGGAAT TTGGTACGTT CGAAAAATAA CATTTGTTGAA
Conservation *****

          ....|....| ....|....| ....|....| ....|....| ....|....|
          1805     1815     1825     1835     1845     1855
1b_SalI  ATTGTAATAA ATGTGGACAA CACTTCTGAG GTGGACGAAT TGAAGGAAAA GGAAGAGAAG
1b_Thai  ATTGTAATAA ATGTGGACAA CACTTCTGAG GTGGACGAAT TGAAGGAAAA GGAAGAGAAG
Conservation *****

```

|              |             |             |             |             |             |             |
|--------------|-------------|-------------|-------------|-------------|-------------|-------------|
|              | ..... ..... | ..... ..... | ..... ..... | ..... ..... | ..... ..... | ..... ..... |
|              | 1865        | 1875        | 1885        | 1895        | 1905        | 1915        |
| 1b_SalI      | CTTGCAAAGT  | ACATGGAAGA  | AATTAACGAA  | AAAATTAAG   | ACATGATAAA  | GAAAATGCAC  |
| 1b_Thai      | CTTGCAAAGT  | ACATGGAAGA  | AATTAACGAA  | AAAATTAAG   | ACATGATAAA  | GAAAATGCAC  |
| Conservation | *****       | *****       | *****       | *****       | *****       | *****       |
|              | ..... ..... | ..... ..... | ..... ..... | ..... ..... | ..... ..... | ..... ..... |
|              | 1925        | 1935        | 1945        | 1955        | 1965        | 1975        |
| 1b_SalI      | AAATTAAGG   | AAGTCATCGT  | TTTAAGAGAT  | AAAGCGAATC  | AAGATGTCAT  | CACGATTAAC  |
| 1b_Thai      | AAATTAAGG   | AAGTCATCGT  | TTTAAGAGAT  | AAAGCGAATC  | AAGATGTCAT  | CACGATTAAC  |
| Conservation | *****       | *****       | *****       | *****       | *****       | *****       |
|              | ..... ..... | ..... ..... | ..... ..... | ..... ..... | ..... ..... | ..... ..... |
|              | 1985        | 1995        | 2005        | 2015        | 2025        | 2035        |
| 1b_SalI      | GAGTTACTGA  | ATGGAGGGTC  | GAATGCCAAT  | TTGGAAGAAT  | TCATAAGTAA  | AAAGAACAAA  |
| 1b_Thai      | GAGTTACTGA  | ATGGAGGGTC  | GAATGCCAAT  | TTGGAAGAAT  | TCATAAGTAA  | AAAGAACAAA  |
| Conservation | *****       | *****       | *****       | *****       | *****       | *****       |
|              | ..... ..... | ..... ..... | ..... ..... | ..... ..... | ..... ..... | ..... ..... |
|              | 2045        | 2055        | 2065        | 2075        | 2085        | 2095        |
| 1b_SalI      | GCCAATGATG  | ATATTAATTC  | GATATTTAAA  | ACATTGTACA  | GCGGAGACGT  | ATATGATCTT  |
| 1b_Thai      | GCCAATGATG  | ATATTAATTC  | GATATTTAAA  | ACATTGTACA  | GCGGAGACGT  | ATATGATCTT  |
| Conservation | *****       | *****       | *****       | *****       | *****       | *****       |
|              | ..... ..... | ..... ..... | ..... ..... | ..... ..... | ..... ..... | ..... ..... |
|              | 2105        | 2115        | 2125        | 2135        | 2145        | 2155        |
| 1b_SalI      | ATCGAAACGG  | TGGGCACGTT  | TGTTTCGTGAA | AAGAGAAAAA  | TTGTAGGCGA  | AACGTTTTC   |
| 1b_Thai      | ATCGAAACGG  | TGGGCACGTT  | TGTTTCGTGAA | AAGAGAAAAA  | TTGTAGGCGA  | AACGTTTTC   |
| Conservation | *****       | *****       | *****       | *****       | *****       | *****       |
|              | ..... ..... | ..... ..... | ..... ..... | ..... ..... | ..... ..... | ..... ..... |
|              | 2165        | 2175        | 2185        | 2195        | 2205        | 2215        |
| 1b_SalI      | GCTAAACAAA  | TTGACCAAGT  | GGAACAATAT  | CTCAGCGAAG  | TAAGAGTGGC  | TCATGCCAAT  |
| 1b_Thai      | GCTAAACAAA  | TTGACCAAGT  | GGAACAATAT  | CTCAGCGAAG  | TAAGAGTGGC  | TCATGCCAAT  |
| Conservation | *****       | *****       | *****       | *****       | *****       | *****       |
|              | ..... ..... | ..... ..... | ..... ..... | ..... ..... | ..... ..... | ..... ..... |
|              | 2225        | 2235        | 2245        | 2255        | 2265        | 2275        |
| 1b_SalI      | TTAGACACCC  | TGACTCATGA  | AAAATTGATA  | AATGCCTATG  | ATCAGTTAAG  | CGCAGAAGAG  |
| 1b_Thai      | TTAGACACCC  | TGACTCATGA  | AAAATTGATA  | AATGCCTATG  | ATCAGTTAAG  | CGCAGAAGAG  |
| Conservation | *****       | *****       | *****       | *****       | *****       | *****       |
|              | ..... ..... | ..... ..... | ..... ..... | ..... ..... | ..... ..... | ..... ..... |
|              | 2285        | 2295        | 2305        | 2315        | 2325        | 2335        |
| 1b_SalI      | AACAATACAG  | AAAAACTTAA  | AAATGATCTT  | GTTAAGAAGA  | AGAGCGAAGA  | TCTATACAAA  |
| 1b_Thai      | AACAATACAG  | AAAAACTTAA  | AAATGATCTT  | GTTAAGAAGA  | AGAGCGAAGA  | TCTATACAAA  |
| Conservation | *****       | *****       | *****       | *****       | *****       | *****       |
|              | ..... ..... | ..... ..... | ..... ..... | ..... ..... | ..... ..... | ..... ..... |
|              | 2345        | 2355        | 2365        | 2375        | 2385        | 2395        |
| 1b_SalI      | AAAATGGCAG  | ACTCTTTGAA  | AACATTTAAA  | ACTGAATATG  | CTGATTTGGT  | GAGAAATATG  |
| 1b_Thai      | AAAATGGCAG  | ACTCTTTGAA  | AACATTTAAA  | ACTGAATATG  | CTGATTTGGT  | GAGAAATATG  |
| Conservation | *****       | *****       | *****       | *****       | *****       | *****       |
|              | ..... ..... | ..... ..... | ..... ..... | ..... ..... | ..... ..... | ..... ..... |
|              | 2405        | 2415        | 2425        | 2435        | 2445        | 2455        |
| 1b_SalI      | GAGGAATACG  | AAAGGGAAGA  | AAAAATATTA  | GAACAGTGTA  | TGGGAAAAAC  | TTTGAAAAAG  |
| 1b_Thai      | GAGGAATACG  | AAAGGGAAGA  | AAAAATATTA  | GAACAGTGTA  | TGGGAAAAAC  | TTTGAAAAAG  |
| Conservation | *****       | *****       | *****       | *****       | *****       | *****       |

```

      ....|....| ....|....| ....|....| ....|....| ....|....|
      2465      2475      2485      2495      2505      2515
1b_SalI  GAGGAAGAAC ACTTCAACAC GTTACAAGTG GATGGAGAAG CTCTGAAAGA CACGTACAAT
1b_Thai  GAGGAAGAAC ACTTCAACAC GTTACAAGTG GATGGAGAAG CTCTGAAAGA CACGTACAAT
Conservation *****

```

```

      ....|....| ....|....| ....|....| ....|....| ....|....|
      2525      2535      2545      2555      2565      2575
1b_SalI  TGCGCAGGAT TCGAAAAACT GAGGGGCACT TTTTCGCAGA GGAAATTCTGA ATTGTCACAA
1b_Thai  TGCGCAGGAT TCGAAAAACT GAGGGGCACT TTTTCGCAGA GGAAATTCTGA ATTGTCACAA
Conservation *****

```

```

      ....|....| ....|....| ....|....| ....|....| ....|....|
      2585      2595      2605      2615      2625      2635
1b_SalI  AAAATAGACC ACGTTAAGGG TGTGGTGACT AATATGGAGA AACTTTTAAA ATCTTACAGT
1b_Thai  AAAATAGACC ACGTTAAGGG TGTGGTGACT AATATGGAGA AACTTTTAAA ATCTTACAGT
Conservation *****

```

```

      ....|....| ....|....| ....|....| ....|....| ....|....|
      2645      2655      2665      2675      2685      2695
1b_SalI  GATTTGGAGA AGCATTCTTCT TTTACTTGAT GATAGCGATT ACGTAAAACG AGTGGAACA
1b_Thai  GCTTTGGAGA AGCATTCTTCT TTTACTTGAT GATAGCGATT ACGTAAAACG AGTGGAACA
Conservation *.*****

```

```

      ....|....| ....|....| ....|....| ....|....| ....|....|
      2705      2715      2725      2735      2745      2755
1b_SalI  TTAAGACAAA CTGTTCAGCG CGAAATGATG AATAAAAAAA TGAGTGTTCA AGAGGACAGC
1b_Thai  TTAAGACAAA CTGTTCAGCG CGAAATGATG AATAAAAAAA TGAGTGTTCA AGAGGACAGC
Conservation *****

```

```

      ....|....| ....|....| ....|....| ....|....| ....|....|
      2765      2775      2785      2795      2805      2815
1b_SalI  TTCAAGAGAA GGACTGAATC TGTACTTAAG ACCATCAAAA TATTCGAAAG TTTAAACAAA
1b_Thai  TTCAAGAGAA GGACTGAATC TGTACTTAAG ACCATCAAAA TATTCGAAAG TTTAAACAAA
Conservation *****

```

```

      ....|....| ....|....| ....|....| ....|....| ....|....|
      2825      2835      2845      2855      2865      2875
1b_SalI  ACCATACATT TTCATAACCA CTTAAACAGG AGCATAAACG AATGTGAAGG CATCAATGTA
1b_Thai  ACCATACATT TTCATAACCA CTTAAACAGG AGCATAAACG AATGTGAAGG CATCAATGTA
Conservation *****

```

```

      ....|....| ....|....| ....|....| ....|....| ....|....|
      2885      2895      2905      2915      2925      2935
1b_SalI  TCGATCAACA GTTTAAAAGG CAAAACAGTC GCGTTAAAGG GCGAACTGCA AAAAGAAATT
1b_Thai  TCGATCAACA GTTTAAAAGG CAAAACAGTC GCGTTAAAGG GCGAACTGCA AAAAGAAATT
Conservation *****

```

```

      ....|....| ....|....| ....|....| ....|....| ....|....|
      2945      2955      2965      2975      2985      2995
1b_SalI  GATGACATTG GAGCAGACCA GCTGATAAGT GAAGCTGTAA AAGTGGCACT ACTAGATAAG
1b_Thai  GATGACATTG GAGCAGACCA GCTGATAAGT GAAGCTGTAA AAGTGGCACT ACTAGATAAG
Conservation *****

```

```

      ....|....| ....|....| ....|....| ....|....| ....|....|
      3005      3015      3025      3035      3045      3055
1b_SalI  TTGAAAGCAG AACTAGGAAG TGTAACAGC AAATTAGATG AACTCACAT GGATGATTTG
1b_Thai  TTGAAAGCAG AACTAGGAAG TGTAACAGC AAATTAGATG AACTCACAT GGATGATTTG
Conservation *****

```

```

      ....|....| ....|....| ....|....| ....|....| ....|....|

```

|              |             |            |            |            |            |            |
|--------------|-------------|------------|------------|------------|------------|------------|
|              | 3065        | 3075       | 3085       | 3095       | 3105       | 3115       |
| 1b_SalI      | CTCAAAAAAT  | CAACAGATTT | GAATAAATTC | TACAGAGATT | CAAAAAGCGA | TTTGCACGAA |
| 1b_Thai      | CTCAAAAAAT  | CAACAGATTT | GAATAAATTC | TACAGAGATT | CAAAAAGCGA | TTTGCACGAA |
| Conservation | *****       | *****      | *****      | *****      | *****      | *****      |
|              | .... ....   | .... ....  | .... ....  | .... ....  | .... ....  | .... ....  |
|              | 3125        | 3135       | 3145       | 3155       | 3165       | 3175       |
| 1b_SalI      | AAGAGGCAAG  | AATACCCTGT | GCACATTCT  | CTAGAAAAGG | TAAATGACTG | GGAAGAAATT |
| 1b_Thai      | AAGAGGCAAG  | AATACCCTGT | GCACATTCT  | CTAGAAAAGG | TAAATGACTG | GGAAGAAATT |
| Conservation | *****       | *****      | *****      | *****      | *****      | *****      |
|              | .... ....   | .... ....  | .... ....  | .... ....  | .... ....  | .... ....  |
|              | 3185        | 3195       | 3205       | 3215       | 3225       | 3235       |
| 1b_SalI      | AAAACGGAG   | TCCACGAATT | AAATGCTCAT | TATAATGCAT | TCAACGACAA | TAAGGCTAAA |
| 1b_Thai      | AAAACGGAG   | TCCACGAATT | AAATGCTCAT | TATAATGCAT | TCAACGACAA | TAAGGCTAAA |
| Conservation | *****       | *****      | *****      | *****      | *****      | *****      |
|              | .... ....   | .... ....  | .... ....  | .... ....  | .... ....  | .... ....  |
|              | 3245        | 3255       | 3265       | 3275       | 3285       | 3295       |
| 1b_SalI      | CTAATTTTAG  | CCAATTCGCG | CATGTACTTG | GAATCAATAT | ATAACCTTAT | AAAAGAGTTG |
| 1b_Thai      | CTAATTTTAG  | CCAATTCGCG | CATGTACTTG | GAATCAATAT | ATAACCTTAT | AAAAGAGTTG |
| Conservation | *****       | *****      | *****      | *****      | *****      | *****      |
|              | .... ....   | .... ....  | .... ....  | .... ....  | .... ....  | .... ....  |
|              | 3305        | 3315       | 3325       | 3335       | 3345       | 3355       |
| 1b_SalI      | GTTTCATAACA | CAAGGGAGGA | GAAAGACAAA | ATGGAGAGAT | CTCTAAAGGG | AATAGAAAAA |
| 1b_Thai      | GTTTCATAACA | CAAGGGAGGA | GAAAGACAAA | ATGGAGAGAT | CTCTAAAGGG | AATAGAAAAA |
| Conservation | *****       | *****      | *****      | *****      | *****      | *****      |
|              | .... ....   | .... ....  | .... ....  | .... ....  | .... ....  | .... ....  |
|              | 3365        | 3375       | 3385       | 3395       | 3405       | 3415       |
| 1b_SalI      | AGCGTAGAAA  | CTATCGAACT | GAACCAGGAT | TATAAAAACG | CTAAAGTTAC | GGACAATGAG |
| 1b_Thai      | AGCGTAGAAA  | CTATCGAACT | GAACCAGGAT | TATAAAAACG | CTAAAGTTAC | GGACAATGAG |
| Conservation | *****       | *****      | *****      | *****      | *****      | *****      |
|              | .... ....   | .... ....  | .... ....  | .... ....  | .... ....  | .... ....  |
|              | 3425        | 3435       | 3445       | 3455       | 3465       | 3475       |
| 1b_SalI      | AATGAAATAA  | AAAATATAAA | TGAAGACACT | ATTCCAAAAA | TTAAGGAACG | AATTGATGAG |
| 1b_Thai      | AATGAAATAA  | AAAATATAAA | TGAAGACACT | ATTCCAAAAA | TTAAGGAACG | AATTGATGAG |
| Conservation | *****       | *****      | *****      | *****      | *****      | *****      |
|              | .... ....   | .... ....  | .... ....  | .... ....  | .... ....  | .... ....  |
|              | 3485        | 3495       | 3505       | 3515       | 3525       | 3535       |
| 1b_SalI      | TATAGCAGAA  | AACTGACTAA | ATTCGAGGAA | CAATCGGATA | GTTTAAACAA | CAAAGACACG |
| 1b_Thai      | TGTAGCAGAA  | AACTGACTAA | ATTCGAGGAA | CAATCGGATA | GTTTAAACAA | CAAAGACACG |
| Conservation | *.*****     | *****      | *****      | *****      | *****      | *****      |
|              | .... ....   | .... ....  | .... ....  | .... ....  | .... ....  | .... ....  |
|              | 3545        | 3555       | 3565       | 3575       | 3585       | 3595       |
| 1b_SalI      | AATAAAGGAA  | GTGACGTTAC | TCTCTTGCTT | GATGTGATAA | GACAAATGAA | AGGTACTTAT |
| 1b_Thai      | AATAAAGGAA  | GTGACGTTAC | TCTCTTGCTT | GATGTGATAA | GACAAATGAA | AGGTACTTAT |
| Conservation | *****       | *****      | *****      | *****      | *****      | *****      |
|              | .... ....   | .... ....  | .... ....  | .... ....  | .... ....  | .... ....  |
|              | 3605        | 3615       | 3625       | 3635       | 3645       | 3655       |
| 1b_SalI      | CAAGAATTAA  | AAAAGATACC | TACTGAGATG | TTCAAAGAGA | GGGACGAAAT | AAGGAACACT |
| 1b_Thai      | CAAGAATTAA  | AAAAGATACC | TACTGAGATG | TTCAAAGAGA | GGGACGAAAT | AAGGAACACT |
| Conservation | *****       | *****      | *****      | *****      | *****      | *****      |
|              | .... ....   | .... ....  | .... ....  | .... ....  | .... ....  | .... ....  |
|              | 3665        | 3675       | 3685       | 3695       | 3705       | 3715       |

|              |            |             |             |            |            |             |
|--------------|------------|-------------|-------------|------------|------------|-------------|
| 1b_SalI      | GAAGAAAATG | TAAACAAGGT  | TCAATTTCGCA | TACGAGAGAA | AATTAATTGA | GCAATTTTTTA |
| 1b_Thai      | GAAGAAAATG | TAAACAAGGT  | TCAATTTCGCA | TACGAGAGAA | AATTAATTGA | GCAATTTTTTA |
| Conservation | *****      | *****       | *****       | *****      | *****      | *****       |
|              | .... ....  | .... ....   | .... ....   | .... ....  | .... ....  | .... ....   |
|              | 3725       | 3735        | 3745        | 3755       | 3765       | 3775        |
| 1b_SalI      | AAAAGAATTA | CTCAGAAGAG  | GAATGAGGCG  | GAAGAGCAAA | CACAACAGAT | CAGCGCAATT  |
| 1b_Thai      | AAAAGAATTA | CTCAGAAGAG  | GAATGAGGCG  | GAAGAGCAAA | CACAACAGAT | CAGCGCAATT  |
| Conservation | *****      | *****       | *****       | *****      | *****      | *****       |
|              | .... ....  | .... ....   | .... ....   | .... ....  | .... ....  | .... ....   |
|              | 3785       | 3795        | 3805        | 3815       | 3825       | 3835        |
| 1b_SalI      | GTAAACAAA  | TTGAAGGGAT  | AAGAAAAGAA  | ACGGGAGATC | CTATCGACAA | AGAATTAACC  |
| 1b_Thai      | GTAAACAAA  | TTGAAGGGAT  | AAGAAAAGAA  | ACGGGAGATC | CTATCGACAA | AGAATTAACC  |
| Conservation | *****      | *****       | *****       | *****      | *****      | *****       |
|              | .... ....  | .... ....   | .... ....   | .... ....  | .... ....  | .... ....   |
|              | 3845       | 3855        | 3865        | 3875       | 3885       | 3895        |
| 1b_SalI      | ACCACGAACT | GCGAAAAACA  | TCTTCACGAT  | GCTGAAGAAA | AAGGGGAGGA | AATAAAGCAA  |
| 1b_Thai      | ACCACGAACT | GCGAAAAACA  | TCTTCACGAT  | GCTGAAGAAA | AAGGGGAGGA | AATAAAGCAA  |
| Conservation | *****      | *****       | *****       | *****      | *****      | *****       |
|              | .... ....  | .... ....   | .... ....   | .... ....  | .... ....  | .... ....   |
|              | 3905       | 3915        | 3925        | 3935       | 3945       | 3955        |
| 1b_SalI      | ATTGAAGAGT | TGTCCACCAA  | ACTGAGAGGA  | GAAGCTGCCA | CTACTGATGT | CATAAGTGAA  |
| 1b_Thai      | ATTGAAGAGT | TGTCCACCAA  | ACTGAGAGGA  | GAAGCTGCCA | CTACTGATGT | CATAAGTGAA  |
| Conservation | *****      | *****       | *****       | *****      | *****      | *****       |
|              | .... ....  | .... ....   | .... ....   | .... ....  | .... ....  | .... ....   |
|              | 3965       | 3975        | 3985        | 3995       | 4005       | 4015        |
| 1b_SalI      | GTCATAAAAA | TTAAGAACA   | GGTTTACGCA  | CATTTGGAAA | AAGCCACAAG | CAATAGTAAC  |
| 1b_Thai      | GTCATAAAAA | TTAAGAACA   | GGTTTACGCA  | CATTTGGAAA | AAGCCACAAG | CAATAGTAAC  |
| Conservation | *****      | *****       | *****       | *****      | *****      | *****       |
|              | .... ....  | .... ....   | .... ....   | .... ....  | .... ....  | .... ....   |
|              | 4025       | 4035        | 4045        | 4055       | 4065       | 4075        |
| 1b_SalI      | CACGTAAGCG | AGGCACTGAA  | CACAATTAAA  | GAAATGAAAG | AACTAATACT | GTCAGAGAGT  |
| 1b_Thai      | CACGTAAGCG | AGGCACTGAA  | CACAATTAAA  | GAAATGAAAG | AACTAATACT | GTCAGAGAGT  |
| Conservation | *****      | *****       | *****       | *****      | *****      | *****       |
|              | .... ....  | .... ....   | .... ....   | .... ....  | .... ....  | .... ....   |
|              | 4085       | 4095        | 4105        | 4115       | 4125       | 4135        |
| 1b_SalI      | TATAACAGTG | TTATTTAACTT | TATCTTAAGG  | AATGTAAATG | ATGCTCATAA | ATATGTCGAA  |
| 1b_Thai      | TATAACAGTG | TTATTTAACTT | TATCTTAAGG  | AATGTAAATG | ATGCTCATAA | ATATGTCGAA  |
| Conservation | *****      | *****       | *****       | *****      | *****      | *****       |
|              | .... ....  | .... ....   | .... ....   | .... ....  | .... ....  | .... ....   |
|              | 4145       | 4155        | 4165        | 4175       | 4185       | 4195        |
| 1b_SalI      | TTGGTAAAAA | TGGAATTGCT  | AAAAATTGAA  | GATGCCACTG | ACCATGTGAA | GATACGATTT  |
| 1b_Thai      | TTGGTAAAAA | TGGAATTGCT  | AAAAATTGAA  | GATGCCACTG | ACCATGTGAA | GATACGATTT  |
| Conservation | *****      | *****       | *****       | *****      | *****      | *****       |
|              | .... ....  | .... ....   | .... ....   | .... ....  | .... ....  | .... ....   |
|              | 4205       | 4215        | 4225        | 4235       | 4245       | 4255        |
| 1b_SalI      | GAGGAAGCAA | AGAAGTTAAA  | GGAAAAATC   | AAGACAGATG | TGGATGACGA | GGGGCAGAT   |
| 1b_Thai      | GAGGAAGCAA | AGAAGTTAAA  | GGAAAAATC   | AAGACAGATG | TGGATGACGA | GGGGCAGAT   |
| Conservation | *****      | *****       | *****       | *****      | *****      | *****       |
|              | .... ....  | .... ....   | .... ....   | .... ....  | .... ....  | .... ....   |
|              | 4265       | 4275        | 4285        | 4295       | 4305       | 4315        |
| 1b_SalI      | CATATCATCA | AAGAAATTGA  | AGAAATAAGA  | AAAGTAATTT | TGAATGAAAT | AAAAGACACA  |

```

1b_Thai      CATATCATCA AAGAAATGA AGAAATAAGA AAAGTAATTT TGAATGAAAT AAAAGACACA
Conservation *****

      ....|....| ....|....| ....|....| ....|....| ....|....| ....|....|
      4325      4335      4345      4355      4365      4375
1b_SalI     AGCACATTTT TAACAAATGC AGAAAAGGGC AAAGAAAATT GTCTTCTACA TTTCGAGAAT
1b_Thai     AGCACATTTT TAACAAATGC AGAAAAGGGC AAAGAAAATT GTCTTCTACA TTTCGAGAAT
Conservation *****

      ....|....| ....|....| ....|....| ....|....| ....|....| ....|....|
      4385      4395      4405      4415      4425      4435
1b_SalI     GCAAAGGGGG GAAAAGCAAA ATTTGATTAC TTAAAAGAAC ATGGTGACGG TGAGCACAAA
1b_Thai     GCAAAGGGGG GAAAAGCAAA ATTTGATTAC TTAAAAGAAC ATGGTGACGG TGAGCACAAA
Conservation *****

      ....|....| ....|....| ....|....| ....|....| ....|....| ....|....|
      4445      4455      4465      4475      4485      4495
1b_SalI     AGAATATCAC ACAGTGAGAT AAATATGGTG GAAGAAAATA TGACAAAAGT GAAACAACAC
1b_Thai     AGAATATCAC ACAGTGAGAT AAATATGGTG GAAGAAAATA TGACAAAAGT GAAACAACAC
Conservation *****

      ....|....| ....|....| ....|....| ....|....| ....|....| ....|....|
      4505      4515      4525      4535      4545      4555
1b_SalI     ACGGATGAAG CTGACAAGGA TGTGGAACAA ACGAAAAAAT TTTATTACTC TATTTTGGGA
1b_Thai     ACGGATGAAG CTGACAAGGA TGTGGAACAA ACGAAAAAAT TTTATTACTC TATTTTGGGG
Conservation *****

      ....|....| ....|....| ....|....| ....|....| ....|....| ....|....|
      4565      4575      4585      4595      4605      4615
1b_SalI     TATGAAAAAC TAATCAATGA TCTGCTAAAC GAATCGCTAC TTAGAAAAGT CAAATTAATA
1b_Thai     TATGAAAAAC TAATCAATGA TCTGCTAAAC GAATCGCTAC TTAGAAAAGT CAAATTAATA
Conservation *****

      ....|....| ....|....| ....|....| ....|....| ....|....| ....|....|
      4625      4635      4645      4655      4665      4675
1b_SalI     TGCGAGAAAT TGAGAACAGA AGTAGACGGA ATAATGGACG AAATGGAACG TGTAGATGTT
1b_Thai     TGCGAGAAAT TGAGAACAGA AGTAGACGGA ATAATGGACG AAATGGAACG TGTAGATGTT
Conservation *****

      ....|....| ....|....| ....|....| ....|....| ....|....| ....|....|
      4685      4695      4705      4715      4725      4735
1b_SalI     AAGGCCAAGG AAGAGTCCAT CGAACAAAGAA CAAAAGGTAA AACAAATGAA GGAGCAATCC
1b_Thai     AAGGCCAAGG AAGAGTCCAT CGAACAAAGAA CAAAAGGTAA AACAAATGAA GGAGCAATCC
Conservation *****

      ....|....| ....|....| ....|....| ....|....| ....|....| ....|....|
      4745      4755      4765      4775      4785      4795
1b_SalI     ATTGTTGAGG GTGATCAGCC TAAAGAACTT AACGAAGAGT CTATGAACGC ATTGCTACAA
1b_Thai     ATTGTTGAGG GTGATCAGCC TAAAGAACTT AACGAAGAGT CTATGAACGC ATTGCTACAA
Conservation *****

      ....|....| ....|....| ....|....| ....|....| ....|....| ....|....|
      4805      4815      4825      4835      4845      4855
1b_SalI     ATAAAAAATT ACAGACAGAA ATTGGACGAC GTTATGTTAA GTATAAAAAG TGTGGAAGAG
1b_Thai     ATAAAAAATT ACAGACAGAA ATTGGACGAC GTTATGTTAA GTATAAAAAG TGTGGAAGAG
Conservation *****

      ....|....| ....|....| ....|....| ....|....| ....|....| ....|....|
      4865      4875      4885      4895      4905      4915
1b_SalI     AATATGGAGC AGTTTTTAAG GAATGCTGGC AGTTACGTGA AAACAACGCT AGACATCTCT
1b_Thai     AATATGGAGC AGTTTTTAAG GAATGCTGGC AGTTACGTGA AAACAACGCT AGACATCTCT

```

```

Conservation *****
          ....|....| ....|....| ....|....| ....|....| ....|....|
          4925    4935    4945    4955    4965    4975
1b_SalI  CAACTGCGAA ATGAAAATTC GTTCGATAAT TTGACAGCGG CGGAGGAAAA CTACAAAATA
1b_Thai  CAACTGCGAA ATGAAAATTC GTTCGATAAT TTGACAGCGG CGGAGGAAAA CTACAAAATA
Conservation *****
          ....|....| ....|....| ....|....| ....|....| ....|....|
          4985    4995    5005    5015    5025    5035
1b_SalI  GCATTGAGAA ATGTTTCAGAA TGAAAAACAG CGTATGATAA GTGAGGAAAA AAGGCTAGCT
1b_Thai  GCATTGAGAA ATGTTTCAGAA TGAAAAACAG CGTATGATAA GTGAGGAAAA AAGGCTAGCT
Conservation *****
          ....|....| ....|....| ....|....| ....|....| ....|....|
          5045    5055    5065    5075    5085    5095
1b_SalI  GAAATGTATA GGGATATCAT TAGTGTAGGA AAAGAATTGG AAGAACAAAA AAAAAGATAC
1b_Thai  GAAATGTATA GGGATATCAT TAGTGTAGGA AAAGAATTGG AAGAACAAAA AAAAAGATAC
Conservation *****
          ....|....| ....|....| ....|....| ....|....| ....|....|
          5105    5115    5125    5135    5145    5155
1b_SalI  GAAGTGGGAT TATTGAAAGG GATAAAAGAG AATGCTGACA GAAGATTGAC CGCATTGGAA
1b_Thai  GAAGTGGGAT TATTGAAAGG GATAAAAGAG AATGCTGACA GAAGATTGAC CGCATTGGAA
Conservation *****
          ....|....| ....|....| ....|....| ....|....| ....|....|
          5165    5175    5185    5195    5205    5215
1b_SalI  TTAACCAAAA AGGAAGTTAA CTCTTTGGTG GATCCGTCCA AATCCATATT TTTTAAATTC
1b_Thai  TTAACCAAAA AGGAAGTTAA CTCTTTGGTG GATCCGTCCA AATCCATATT TTTTAAATTC
Conservation *****
          ....|....| ....|....| ....|....| ....|....| ....|....|
          5225    5235    5245    5255    5265    5275
1b_SalI  AAATTGGACA ACTTAGACGA AACAGATATA ATGAAATATC TATATCGCTA TGCTGATCGA
1b_Thai  AAATTGGACA ACTTAGACGA AACAGATATA ATGAAATATC TATATCGCTA TGCTGATCGA
Conservation *****
          ....|....| ....|....| ....|....| ....|....| ....|....|
          5285    5295    5305    5315    5325    5335
1b_SalI  ATTTACCATA TTTTGTGACGA ATTTGTGAAA TTGTACAAAA TGATAGAAGG ATATTTATCC
1b_Thai  ATTTACCATA TTTTGTGACGA ATTTGTGAAA TTGTACAAAA TGATAGAAGG ATATTTATCC
Conservation *****
          ....|....| ....|....| ....|....| ....|....| ....|....|
          5345    5355    5365    5375    5385    5395
1b_SalI  CAGAATTCGG ACCCCTCTGT AACATTTAAT GAAGTCAAAA TGGTGAGGGA GAAAGCGCAA
1b_Thai  CAGAATTCGG ACCCCTCTGT AACATTTAAT GAAGTCAAAA TGGTGAGGGA GAAAGCGCAA
Conservation *****
          ....|....| ....|....| ....|....| ....|....| ....|....|
          5405    5415    5425    5435    5445    5455
1b_SalI  ATGGAAGAAA TGAGCCTTGG AGAAAAGGAA GAAGAGTCAA AAGAAGTACT GAGAGACATG
1b_Thai  ATGGAAGAAA TGAGCCTTGG AGAAAAGGAA GAAGAGTCAA AAGAAGTACT GAGAGACATG
Conservation *****
          ....|....| ....|....| ....|....| ....|....| ....|....|
          5465    5475    5485    5495    5505    5515
1b_SalI  AAAAAAAGG AGTCCATAAG GTTGTAAAC GAAATGATGG AAATGCTGAA CAGTGCAAAG
1b_Thai  AAAAAAAGG AGTCCATAAG GTTGTAAAC GAAATGATGG AAATGCTGAA CAGTGCAAAG
Conservation *****

```



|              |            |            |             |            |            |            |
|--------------|------------|------------|-------------|------------|------------|------------|
|              | .... ....  | .... ....  | .... ....   | .... ....  | .... ....  | .... ....  |
|              | 5525       | 5535       | 5545        | 5555       | 5565       | 5575       |
| 1b_SalI      | GAAAGAGTTA | CGGAAGATCA | TGCAAAAAGTC | AGCAACTATG | TGGAGAATGT | TAAAAAAGAC |
| 1b_Thai      | GAAAGAGTTA | CGGAAGATCA | TGCAAAAAGTC | AGCAACTATG | TGGAGAATGT | TAAAAAAGAC |
| Conservation | *****      | *****      | *****       | *****      | *****      | *****      |
|              |            |            |             |            |            |            |
|              | .... ....  | .... ....  | .... ....   | .... ....  | .... ....  | .... ....  |
|              | 5585       | 5595       | 5605        | 5615       | 5625       | 5635       |
| 1b_SalI      | GTCACCGATT | TAAAGGTACT | GGACGATGTA  | AATAACGGCG | CCAATGTTTT | TAATAAGGCA |
| 1b_Thai      | GTCACCGATT | TAAAGGTACT | GGACGATGTA  | AATAACGGCG | CCAATGTTTT | TAATAAGGCA |
| Conservation | *****      | *****      | *****       | *****      | *****      | *****      |
|              |            |            |             |            |            |            |
|              | .... ....  | .... ....  | .... ....   | .... ....  | .... ....  | .... ....  |
|              | 5645       | 5655       | 5665        | 5675       | 5685       | 5695       |
| 1b_SalI      | ATGAATAGTG | TTAACGAAAT | TAAAGACGCA  | AAGTATATGA | ACCATAGGAA | GGAAGCGGAA |
| 1b_Thai      | ATGAATAGTG | TTAACGAAAT | TAAAGACGCA  | AAGTATATGA | ACCATAGGAA | GGAAGCGGAA |
| Conservation | *****      | *****      | *****       | *****      | *****      | *****      |
|              |            |            |             |            |            |            |
|              | .... ....  | .... ....  | .... ....   | .... ....  | .... ....  | .... ....  |
|              | 5705       | 5715       | 5725        | 5735       | 5745       | 5755       |
| 1b_SalI      | AATATATACG | AAAATATGAT | ACAACGGCG   | AACTATTTCT | TAGATGACGA | TGTTAGGATG |
| 1b_Thai      | AATATATACG | AAAATATGAT | ACAACGGCG   | AACTATTTCT | TAGATGACGA | TGTTAGGATG |
| Conservation | *****      | *****      | *****       | *****      | *****      | *****      |
|              |            |            |             |            |            |            |
|              | .... ....  | .... ....  | .... ....   | .... ....  | .... ....  | .... ....  |
|              | 5765       | 5775       | 5785        | 5795       | 5805       | 5815       |
| 1b_SalI      | GAGTCCACGG | GAAAGTTAAG | CGAAGCGGCA  | TTTGCAAAGG | CAGAACCGGG | TATAGTGTCA |
| 1b_Thai      | GAGTCCACGG | GAAAGTTAAG | CGAAGCGGCA  | TTTGCAAAGG | CAGAACCGGG | TATAGTGTCA |
| Conservation | *****      | *****      | *****       | *****      | *****      | *****      |
|              |            |            |             |            |            |            |
|              | .... ....  | .... ....  | .... ....   | .... ....  | .... ....  | .... ....  |
|              | 5825       | 5835       | 5845        | 5855       | 5865       | 5875       |
| 1b_SalI      | GACATTTTGT | GCAAAATAAA | GGAGGCGAAG  | GAAATTGTAG | AAAAAATAGA | AGAAGAGTCA |
| 1b_Thai      | GACATTTTGT | GCAAAATAAA | GGAGGCGAAG  | GAAATTGTAG | AAAAAATAGA | AGAAGAGTCA |
| Conservation | *****      | *****      | *****       | *****      | *****      | *****      |
|              |            |            |             |            |            |            |
|              | .... ....  | .... ....  | .... ....   | .... ....  | .... ....  | .... ....  |
|              | 5885       | 5895       | 5905        | 5915       | 5925       | 5935       |
| 1b_SalI      | ATAGGTATAC | AAAATAAACA | AATAGAAGGG  | GAAAGGCTCT | CCACTGAGGC | GAACCACATT |
| 1b_Thai      | ATAGGTATAC | AAAATAAACA | AATAGAAGGG  | GAAAGGCTCT | CCACTGAGGC | GAACCACATT |
| Conservation | *****      | *****      | *****       | *****      | *****      | *****      |
|              |            |            |             |            |            |            |
|              | .... ....  | .... ....  | .... ....   | .... ....  | .... ....  | .... ....  |
|              | 5945       | 5955       | 5965        | 5975       | 5985       | 5995       |
| 1b_SalI      | TACAGCGTGG | CAAAGCTGAA | AAATGAATTT  | AAAAACAAAA | AGAATGAAGC | GAAACTTAAG |
| 1b_Thai      | TACAGCGTGG | CAAAGCTGAA | AAATGAATTT  | AAAAACAAAA | AGAATGAAGC | GAAACTTAAG |
| Conservation | *****      | *****      | *****       | *****      | *****      | *****      |
|              |            |            |             |            |            |            |
|              | .... ....  | .... ....  | .... ....   | .... ....  | .... ....  | .... ....  |
|              | 6005       | 6015       | 6025        | 6035       | 6045       | 6055       |
| 1b_SalI      | GTCATATTCG | TGCTAGCCGA | AATAGAGGAA  | GCATTACATA | AATTAAAAAG | TGTGAATAAA |
| 1b_Thai      | GTCATATTCG | TGCTAGCCGA | AATAGAGGAA  | GCATTACATA | AATTAAAAAG | TGTGAATAAA |
| Conservation | *****      | *****      | *****       | *****      | *****      | *****      |
|              |            |            |             |            |            |            |
|              | .... ....  | .... ....  | .... ....   | .... ....  | .... ....  | .... ....  |
|              | 6065       | 6075       | 6085        | 6095       | 6105       | 6115       |
| 1b_SalI      | GTAAAATGCC | ATTATGATAA | TTATGATAAT  | TATAATGATA | TACTAGAAAA | TAACGAAGAA |
| 1b_Thai      | GTAAAATGCC | ATTATGATAA | TTATGATAAT  | TATAATGATA | TACTAGAAAA | TAACGAAGAA |
| Conservation | *****      | *****      | *****       | *****      | *****      | *****      |

```

.....|.....| .....|.....| .....|.....| .....|.....| .....|.....|
    6125      6135      6145      6155      6165      6175
1b_SalI    CATGAGAATT TCAAGCAAAT TTCTTCTACC TACAAGTTGA AGAAGGCCCA AATAGCGAAA
1b_Thai    CATGAGAATT TCAAGCAAAT TTCTTCTACC TACAAGTTGA AGAAGGCCCA AATAGCGAAA
Conservation *****

```

```

.....|.....| .....|.....| .....|.....| .....|.....| .....|.....|
    6185      6195      6205      6215      6225      6235
1b_SalI    GAAGCAGATA TAAATGAAAT GAAAAATGAT GCAAATATGT ACAAAGACAA GTTAGCCAGT
1b_Thai    GAAGCAGATA TAAATGAAAT GAAAAATGAT GCAAATATGT ACAAAGACAA GTTAGCCAGT
Conservation *****

```

```

.....|.....| .....|.....| .....|.....| .....|.....| .....|.....|
    6245      6255      6265      6275      6285      6295
1b_SalI    TTGGATAAAA ACGGGGAGAC TTTTAAACGAT GGAAGCGATG AAATTTCTAC TGCACAGAAG
1b_Thai    TTGGATAAAA ACGGGGAGAC TTTTAAACGAT GGAAGCGATG AAATTTCTAC TGCACAGAAG
Conservation *****

```

```

.....|.....| .....|.....| .....|.....| .....|.....| .....|.....|
    6305      6315      6325      6335      6345      6355
1b_SalI    TACAAAACCTG ACGTTGAAGG TATTATAGAC AAACATAACG TTATAGATGA AACCATTAAT
1b_Thai    TACAAAACCTG ACGTTGAAGG TATTATAGAC AAACATAACG TTATAGATGA AACCATTAAT
Conservation *****

```

```

.....|.....| .....|.....| .....|.....| .....|.....| .....|.....|
    6365      6375      6385      6395      6405      6415
1b_SalI    GGAATTAATT CCACGCTAGA CGAATTGCTA GAGTTAGGAA ATAATTGTCA GCTGCATCGG
1b_Thai    GGAATTAATT CCACGCTAGA CGAATTGCTA GAGTTAGGAA ATAATTGTCA GCTGCATCGG
Conservation *****

```

```

.....|.....| .....|.....| .....|.....| .....|.....| .....|.....|
    6425      6435      6445      6455      6465      6475
1b_SalI    ACCTTTTTTAA TCAGCAGTTC TTTGAATAAT AAAATTGCAA AATTCTTAGT AGAGATTAGG
1b_Thai    ACCTTTTTTAA TCAGCAGTTC TTTGAATAAT AAAATTGCAA AATTCTTAGT AGAGATTAGG
Conservation *****

```

```

.....|.....| .....|.....| .....|.....| .....|.....| .....|.....|
    6485      6495      6505      6515      6525      6535
1b_SalI    GAACAAAAAG AGAACACAAA AAAATGCTTC CAATATGTAA AAAGAAATCA CCAACATTTG
1b_Thai    GAACAAAAAG AGAACACAAA AAAATGCTTC CAATATGTAA AAAGAAATCA CCAACATTTG
Conservation *****

```

```

.....|.....| .....|.....| .....|.....| .....|.....| .....|.....|
    6545      6555      6565      6575      6585      6595
1b_SalI    GCTAATTTTCG TTTCTGAGTT ACACAAAACCT CAGGGTGGCA TATTGAGAA TGTTAACCTG
1b_Thai    GCTAATTTTCG TTTCTGAGTT ACACAAAACCT CAGGGTGGCA TATTGAGAA TGTTAACCTG
Conservation *****

```

```

.....|.....| .....|.....| .....|.....| .....|.....| .....|.....|
    6605      6615      6625      6635      6645      6655
1b_SalI    GTGGATAACA CACCGGATGC AGATAAGTAT TACCATGAAT TTATGGAAAT AGAGCAGGAG
1b_Thai    GTGGATAACA CACCGGATGC AGATAAGTAT TACCATGAAT TTATGGAAAT AGAGCAGGAG
Conservation *****

```

```

.....|.....| .....|.....| .....|.....| .....|.....| .....|.....|
    6665      6675      6685      6695      6705      6715
1b_SalI    GCAACGAAAA TCGTGAAGGA TATAAAAAAG GAAATATACC ACTTAAACGA TGATGTAGAC
1b_Thai    GCAACGAAAA TCGTGAAGGA TATAAAAAAG GAAATATACC ACTTAAACGA TGATGTAGAC
Conservation *****

```

```

.....|.....| .....|.....| .....|.....| .....|.....| .....|.....|

```

|              |             |             |            |            |            |            |
|--------------|-------------|-------------|------------|------------|------------|------------|
|              | 6725        | 6735        | 6745       | 6755       | 6765       | 6775       |
| 1b_SalI      | GAACCTGTTT  | TGGAGAAACG  | GATAAAAGAC | GTGATCAACA | CGTATAACAA | ATTGAAGACG |
| 1b_Thai      | GAACCTGTTT  | TGGAGAAACG  | GATAAAAGAC | GTGATCAACA | CGTATAACAA | ATTGAAGACG |
| Conservation | *****       | *****       | *****      | *****      | *****      | *****      |
|              | .... ....   | .... ....   | .... ....  | .... ....  | .... ....  | .... ....  |
|              | 6785        | 6795        | 6805       | 6815       | 6825       | 6835       |
| 1b_SalI      | AAAAAGGTCC  | AAATGGACCA  | GAGTTATAAA | AATATGTATA | TCACTAAATT | GAGGGAAGTC |
| 1b_Thai      | AAAAAGGTCC  | AAATGGACCA  | GAGTTATAAA | AATATGTATA | TCACTAAATT | GAGGGAAGTC |
| Conservation | *****       | *****       | *****      | *****      | *****      | *****      |
|              | .... ....   | .... ....   | .... ....  | .... ....  | .... ....  | .... ....  |
|              | 6845        | 6855        | 6865       | 6875       | 6885       | 6895       |
| 1b_SalI      | GAGGGAAGCC  | ACGATCTTTT  | CAACCAGGTA | GCACAATTGA | TTAGAGGCGA | AACGGATAAA |
| 1b_Thai      | GAGGGAAGCC  | ACGATCTTTT  | CAACCAGGTA | GCACAATTGA | TTAGAGGCGA | AACGGATAAA |
| Conservation | *****       | *****       | *****      | *****      | *****      | *****      |
|              | .... ....   | .... ....   | .... ....  | .... ....  | .... ....  | .... ....  |
|              | 6905        | 6915        | 6925       | 6935       | 6945       | 6955       |
| 1b_SalI      | AAAGGGAAAG  | CCCTGTCAGA  | GAGAGAAAAT | AACTTACACA | GTATTTACAA | TTTTGTAAAA |
| 1b_Thai      | AAAGGGAAAG  | CCCTGTCAGA  | GAGAGAAAAT | AACTTACACA | GTATTTACAA | TTTTGTAAAA |
| Conservation | *****       | *****       | *****      | *****      | *****      | *****      |
|              | .... ....   | .... ....   | .... ....  | .... ....  | .... ....  | .... ....  |
|              | 6965        | 6975        | 6985       | 6995       | 7005       | 7015       |
| 1b_SalI      | TTGCACGAAA  | CTGAGCTGCA  | TAATCTTTAC | GCCAAATACA | CACCGGAGTA | TATGGAAAAA |
| 1b_Thai      | TTGCACGAAA  | CTGAGCTGCA  | TAATCTTTAC | GCCAAATACA | CACCGGAGTA | TATGGAAAAA |
| Conservation | *****       | *****       | *****      | *****      | *****      | *****      |
|              | .... ....   | .... ....   | .... ....  | .... ....  | .... ....  | .... ....  |
|              | 7025        | 7035        | 7045       | 7055       | 7065       | 7075       |
| 1b_SalI      | ATAAATAAAA  | TATTTCGACGA | CATCAATGCT | AGGATGATTG | CGGTTGACCT | TAATGATGAT |
| 1b_Thai      | ATAAATAAAA  | TATTTCGACGA | CATCAATGCT | AGGATGATTG | CGGTTGACCT | TAATGATGAT |
| Conservation | *****       | *****       | *****      | *****      | *****      | *****      |
|              | .... ....   | .... ....   | .... ....  | .... ....  | .... ....  | .... ....  |
|              | 7085        | 7095        | 7105       | 7115       | 7125       | 7135       |
| 1b_SalI      | CACAGCAGTG  | AATATAGCGA  | CGTGAAAAGG | CATGAACACG | AGGCCATGCT | TTTAATGGAC |
| 1b_Thai      | CACAGCAGTG  | AATATAGCGA  | CGTGAAAAGG | CATGAACACG | AGGCCATGCT | TTTAATGGAC |
| Conservation | *****       | *****       | *****      | *****      | *****      | *****      |
|              | .... ....   | .... ....   | .... ....  | .... ....  | .... ....  | .... ....  |
|              | 7145        | 7155        | 7165       | 7175       | 7185       | 7195       |
| 1b_SalI      | GCAACAAAATA | ATTTGTCGAA  | GGAAGTAGAA | ATGATGCAGA | ACGAAAGTGG | CGGCAAAAAC |
| 1b_Thai      | GCAACAAAATA | ATTTGTCGAA  | GGAAGTAGAA | ATGATGCAGA | ACGAAAGTGG | CGGCAAAAAC |
| Conservation | *****       | *****       | *****      | *****      | *****      | *****      |
|              | .... ....   | .... ....   | .... ....  | .... ....  | .... ....  | .... ....  |
|              | 7205        | 7215        | 7225       | 7235       | 7245       | 7255       |
| 1b_SalI      | GATGGCATAA  | ATGGAGGAAA  | AAGCCAATC  | GTGGAAGATT | ACACAAATAC | GATGAGCGAA |
| 1b_Thai      | GATGGCATAA  | ATGGAGGAAA  | AAGCCAATC  | GTGGAAGATT | ACACAAATAC | GATGAGCGAA |
| Conservation | *****       | *****       | *****      | *****      | *****      | *****      |
|              | .... ....   | .... ....   | .... ....  | .... ....  | .... ....  | .... ....  |
|              | 7265        | 7275        | 7285       | 7295       | 7305       | 7315       |
| 1b_SalI      | TTCACGGAGC  | AGGCTAAGAC  | AGTTGCGAAA | AAGATACACG | ACTCAAAGG  | GGACTACGCA |
| 1b_Thai      | TTCACGGAGC  | AGGCTAAGAC  | AGTTGCGAAA | AAGATACACG | ACTCAAAGG  | GGACTACGCA |
| Conservation | *****       | *****       | *****      | *****      | *****      | *****      |
|              | .... ....   | .... ....   | .... ....  | .... ....  | .... ....  | .... ....  |
|              | 7325        | 7335        | 7345       | 7355       | 7365       | 7375       |

```

1b_SalI      AATATGTTTG ATCATATAAG GGAGAATGAA GCCATGCTGG AAAGAATTGA CCTGAAGAAG
1b_Thai      AATATGTTTG ATCATATAAG GGAGAATGAA GCCATGCTGG AAAGAATTGA CCTGAAGAAG
Conservation *****
              ....|....| ....|....| ....|....| ....|....| ....|....| ....|....|
              7385      7395      7405      7415      7425      7435
1b_SalI      AAGGACATTA AAGAAATACT TGCGCATTTA AACAGAATGA AGGAATATTT ATTAAAAAAA
1b_Thai      AAGGACATTA AAGAAATACT TGCGCATTTA AACAGAATGA AGGAATATTT ATTAAAAAAA
Conservation *****
              ....|....| ....|....| ....|....| ....|....| ....|....| ....|....|
              7445      7455      7465      7475      7485      7495
1b_SalI      TTATCTGAAG AGGAGAAATT ACATCATATG AGAGAAAAAT TAGAAGAAGT TAACACGAGT
1b_Thai      TTATCTGAAG AGGAGAAATT ACATCATATG AGAGAAAAAT TAGAAGAAGT TAACACGAGT
Conservation *****
              ....|....| ....|....| ....|....| ....|....| ....|....| ....|....|
              7505      7515      7525      7535      7545      7555
1b_SalI      ACTGACGAAA TTGTAAAAAA ATTCAGGACA TATGATCAAA TGGTAGATAT ATCCCAAAT
1b_Thai      ACTGACGAAA TTGTAAAAAA ATTCAGGACA TATGATCAAA TGGTAGATAT ATCCCAAAT
Conservation *****
              ....|....| ....|....| ....|....| ....|....| ....|....| ....|....|
              7565      7575      7585      7595      7605      7615
1b_SalI      ATTGACATCA AAAATGTGCA GTCAAAAAGG TACGACTCTG TCGATGAGAT AGATAAAGAA
1b_Thai      ATTGACATCA AAAATGTGCA GTCAAAAAGG TACGACTCTG TCGATGAGAT AGATAAAGAA
Conservation *****
              ....|....| ....|....| ....|....| ....|....| ....|....| ....|....|
              7625      7635      7645      7655      7665      7675
1b_SalI      ATGAGTTACA TAAAAACTCA CAACAAAGAT TTAATAGACA GCAAATTTAT AGTGAAAGG
1b_Thai      ATGAGTTACA TAAAAACTCA CAACAAAGAT TTAATAGACA GCAAATTTAT AGTGAAAGG
Conservation *****
              ....|....| ....|....| ....|....| ....|....| ....|....| ....|....|
              7685      7695      7705      7715      7725      7735
1b_SalI      GCACTAGAAA ATGACAAAAG GAAAAAGAGC GAAATGGGTT CAGGGTTTAG GGTTCAGGGT
1b_Thai      GCACTAGAAA ATGACAAAAG GAAAAAGAGC GAAATGGCTC AAATATTTTC TACAATTTTC
Conservation *****
              ....|....| ....|....| ....|....| ....|....| ....|....| ....|....|
              7745      7755      7765      7775      7785      7795
1b_SalI      TCAGGGTTTA GGGTTCAGGG TTCAGGGTTT AGGGTTCAGG GTTCAGGGTT TAGGTTTAGG
1b_Thai      AGAGATAACT CGAGTATGTA CGAATATGCA AAAAGCTTTT TTGATAGCGT CCTTAAAGAA
Conservation ***..... *.....*..... *.....*..... *.....*..... *.....*.....
              ....|....| ....|....| ....|....| ....|....| ....|....| ....|....|
              7805      7815      7825      7835      7845      7855
1b_SalI      GTTCAGGGTT TAGGGTTCAG GTTTGTAG--- -----
1b_Thai      ATTGAAAAAC TAACTCAAAT GATTAGAAAT ATGGATAAAT TGATAAACGA AAATGAAGCC
Conservation **.*..... **.....*..... *.....*.....
              ....|....| ....|....| ....|....| ....|....| ....|....| ....|....|
              7865      7875      7885      7895      7905      7915
1b_SalI      -----
1b_Thai      GTAATGGAAA AATTGAAAGA TCAACGAAGG GAGTTACAAA ATGTAGAGAA TGCTTCTACC
Conservation -----
              ....|....| ....|....| ....|....| ....|....| ....|....| ....|....|
              7925      7935      7945      7955      7965      7975
1b_SalI      -----

```

```

1b_Thai      GATTTGGGAA AATTAGAAGA AGTAGACAAA ATGGCACAAA CCAAATCGGA AACAGAGCTA
Conservation

      .....|.....| .....|.....| .....|.....| .....|.....| .....|.....|
      7985      7995      8005      8015      8025      8035
1b_SalI
1b_Thai      TCAGAAAGAA ACGATAGTAG GAATGCAAAG GATGGTGCAA CTTATCTAC  ACTTATGGAT
Conservation

      .....|.....| .....|.....| .....|.....| .....|.....| .....|.....|
      8045      8055      8065      8075      8085      8095
1b_SalI
1b_Thai      GATAAAGAAA CAGATAGCGT GAACGGAGAA GAGACGAAAC AAGAAAATGT TGTGGTGAAG
Conservation

      .....|.....| .....|.....| .....|.....| .....|.....| .....|.....|
      8105      8115      8125      8135      8145      8155
1b_SalI
1b_Thai      AAGGGACTAC CCCCTCAAAC AGACATTTAC ACAAGTGGAG TTTTAAAAAA TGACAGAAAC
Conservation

      .....|.....| .....|.....| .....|.....| .....|.....| .....|.....|
      8165      8175      8185      8195      8205      8215
1b_SalI
1b_Thai      GATCAAAAAT CAGAAAAAAT TGGTGAGAAA AAGTCAAACA AACCAGTAGG CACCGAGGAG
Conservation

      .....|.....| .....|.....| .....|.....| .....|.....| .....|.....|
      8225      8235      8245      8255      8265      8275
1b_SalI
1b_Thai      AATATACAAC ACAGCAGTTA TTTAAACAAT GATAATAGTA ACAACGATAT TGACGTAGGC
Conservation

      .....|.....| .....|.....| .....|.....| .....|.....| .....|.....|
      8285      8295      8305      8315      8325      8335
1b_SalI
1b_Thai      ACCTTGATA  CGCTAGGTGG ATATAACGCT CCAAATGATA ATTATAACAC TAATGAATCT
Conservation

      .....|.....| .....|.....| .....|.....| .....|.....| .....|.....|
      8345      8355      8365      8375      8385      8395
1b_SalI
1b_Thai      GGGGATGATA TAAATGAAGA AGCGAAAAAA AAGAGAAATG CTGTTTTATT CGTCTATGTA
Conservation

      .....|.....| .....|.....| .....|.....| .....|.....| .....|.....|
      8405      8415      8425      8435      8445      8455
1b_SalI
1b_Thai      GGGGGACTGT TTAGTGCTCT TTTCATTTGT ATTGGTGCTG TCTTCTATTT GTTACATAGA
Conservation

      .....|.....| .....|.....| .....|.....| .....|.....| .....|.....|
      8465      8475      8485      8495      8505      8515
1b_SalI
1b_Thai      AAAATTGGCA TAGAGGGGGT CGGAAAAAGC GATCACGAAA AAAAACCAAC CATTGAGGAC
Conservation

      .....|.....| .....|.....| .....|.....| .....|.....| .....|.....|
      8525      8535      8545      8555      8565      8575
1b_SalI
1b_Thai      ACCAAAATG  AGGTATTTGA AGAAACATAT GGTTTAAAAC GTAATGTAAA AGATGAGGTT
Conservation

```

```
      .....|.....| .....|.....| .....|.....| .....|.....
      8585      8595      8605      8615
1b_SalI  -----
1b_Thai  ATTGATGTAC CCTTTGTCGA TATGGAAGAT AATTGTAA
Conservation
```

**Alignment: Pvrpb2a**

```

      ....|.....| ....|.....| ....|.....| ....|.....| ....|.....|
      5          15         25         35         45         55
2a_SalI    ATGGAATA  AGGTGCTCTG  GGCAGTTTTT  TACAATCTAG  TGCTGTTTCT  TCTGGCATCA
2a_Thai    ATGGAATA  AGGTGCTCTG  GGCAGTTTTT  TACAATCTAG  TGCTGTTTCT  TCTGGCATCA
Conservation *****  *****  *****  *****  *****  *****

      ....|.....| ....|.....| ....|.....| ....|.....| ....|.....|
      65         75         85         95        105        115
2a_SalI    AGCAAAGAAA  GCAATCGAAT  TAAAGCATAT  AAACCTAAGA  AGGAACCTAA  GCTATGGCCA
2a_Thai    AGCAAAGAAA  GCAATCGAAT  TAAAGCATAT  AAACCTAAGA  AGGAACCTAA  GCTATGGCCA
Conservation *****  *****  *****  *****  *****  *****

      ....|.....| ....|.....| ....|.....| ....|.....| ....|.....|
      125        135        145        155        165        175
2a_SalI    CTACAAGATA  GCCTTAACGA  AAGCGATAAA  TTCGAGTATA  CCAATGGAGG  GAAGGAAAAT
2a_Thai    CTACAAGATA  GCCTTAACGA  AAGCGATAAA  TTCGAGTATA  CCAATGGAGG  GAAGGAAAAT
Conservation *****  *****  *****  *****  *****  *****

      ....|.....| ....|.....| ....|.....| ....|.....| ....|.....|
      185        195        205        215        225        235
2a_SalI    CCCCCAAATT  TCTTCAGCTC  AAATGTAAAG  GCGCATAATA  AAAAAGAGGG  CAAAAAGTAT
2a_Thai    CCCCCAAATT  TCTTCAGCTC  AAATGTAAAG  GCGCATAATA  AAAAAGAGGG  CAAAAAGTAT
Conservation *****  *****  *****  *****  *****  *****

      ....|.....| ....|.....| ....|.....| ....|.....| ....|.....|
      245        255        265        275        285        295
2a_SalI    GAACAAAATT  TGTCTTTACC  TGACAACACA  TCTTTCGTAA  CGGTAAAAAA  TTATAACTAC
2a_Thai    GAACAAAATT  TGTCTTTACC  TGACAACACA  TCTTTCGTAA  CGGTAAAAAA  TTATAACTAC
Conservation *****  *****  *****  *****  *****  *****

      ....|.....| ....|.....| ....|.....| ....|.....| ....|.....|
      305        315        325        335        345        355
2a_SalI    ACAAGAACAC  CATCACACCA  TGCTTACATA  AGAAGAGACA  ATACACACAC  CAACAGTACA
2a_Thai    ACAAGAACAC  CATCACACCA  TGCTTACATA  AGAAGAGACA  ATACACACAC  CAACAGTACA
Conservation *****  *****  *****  *****  *****  *****

      ....|.....| ....|.....| ....|.....| ....|.....| ....|.....|
      365        375        385        395        405        415
2a_SalI    AATAATAATC  AAATTAGGAA  TGTACTAAA  GAATTAAATC  CTCGGGAATT  TCTCTTCACA
2a_Thai    AATAATAATC  AAATTAGGAA  TGTACTAAA  GAATTAAATC  CTCGGGAATT  TCTCTTCACA
Conservation *****  *****  *****  *****  *****  *****

      ....|.....| ....|.....| ....|.....| ....|.....| ....|.....|
      425        435        445        455        465        475
2a_SalI    CCAAAGAATC  AAATAAGCGC  ATCTCTCATC  CAAACTAACG  GACCGGTGGC  TCCAATGGAT
2a_Thai    CCAAAGAATC  AAATAAGCGC  ATCTCTCATC  CAAACTAACG  GACCGGTGGC  TCCAATGGAT
Conservation *****  *****  *****  *****  *****  *****

      ....|.....| ....|.....| ....|.....| ....|.....| ....|.....|
      485        495        505        515        525        535
2a_SalI    ATACTACGTT  ACCTAGATTT  CTCAAACAGT  TCAGGACAAA  TTATTTCTAC  AGTGATCCG
2a_Thai    ATACTACGTT  ACCTAGATTT  CTCAAACAGT  TCAGGACAAA  TTATTTCTAC  AGTGATCCG
Conservation *****  *****  *****  *****  *****  *****

      ....|.....| ....|.....| ....|.....| ....|.....| ....|.....|
      545        555        565        575        585        595
2a_SalI    TTCTATGTTC  AGATGAATTA  TTTTGTGTA  ATTAAATATT  ACATAACATA  TCATTACGAG
2a_Thai    TTCTATGTTC  AGATGAGTTA  TTTTGTGTA  ATTAAATATT  ACATAACATA  TCATTACGAG
Conservation *****  *****  *****  *****  *****  *****

```

|              |            |            |             |            |            |            |
|--------------|------------|------------|-------------|------------|------------|------------|
|              | .... ....  | .... ....  | .... ....   | .... ....  | .... ....  | .... ....  |
|              | 605        | 615        | 625         | 635        | 645        | 655        |
| 2a_SalI      | GCGAAAAAAA | ATTATGATGA | AGCATATAAT  | CAAAGCGTAA | ATCCACTTAT | GTCAAGTATA |
| 2a_Thai      | GCGAAAAAAA | ATTATGATGA | AGCATATAAT  | CAAAGCGTAA | ATCCACTTAT | GTCAAGTATA |
| Conservation | *****      | *****      | *****       | *****      | *****      | *****      |
|              |            |            |             |            |            |            |
|              | .... ....  | .... ....  | .... ....   | .... ....  | .... ....  | .... ....  |
|              | 665        | 675        | 685         | 695        | 705        | 715        |
| 2a_SalI      | CAAATCAAA  | TAAATTCTTG | TGTACCGAAA  | AAAGCAGCAT | TGGAAAAAAC | AATATTCGTA |
| 2a_Thai      | CAAATCAAA  | TAAATTCTTG | TGTACCGAAA  | AAAGCAGCAT | TGGAAAAAAC | AATATTCGTA |
| Conservation | *****      | *****      | *****       | *****      | *****      | *****      |
|              |            |            |             |            |            |            |
|              | .... ....  | .... ....  | .... ....   | .... ....  | .... ....  | .... ....  |
|              | 725        | 735        | 745         | 755        | 765        | 775        |
| 2a_SalI      | TTAGAATACC | CAGAGAATCA | CAATATAAAC  | CTAAGCAATT | ACGAAGCAAA | GCATAATGAG |
| 2a_Thai      | TTAGAATACC | CAGAGAATCA | CAATATAAAC  | CTAAGCAATT | ACGAAGCAAA | GCATAATGAG |
| Conservation | *****      | *****      | *****       | *****      | *****      | *****      |
|              |            |            |             |            |            |            |
|              | .... ....  | .... ....  | .... ....   | .... ....  | .... ....  | .... ....  |
|              | 785        | 795        | 805         | 815        | 825        | 835        |
| 2a_SalI      | TACAAGCAGC | AATTAGATGC | ATACAAAAAC  | TGTGTACAGG | CAAATATGGA | ATCATACACA |
| 2a_Thai      | TACAAGCAGC | AATTAGATGC | ATACAAAAAC  | TGTGTACAGG | CAAATATGAA | ATCATACACA |
| Conservation | *****      | *****      | *****       | *****      | *****      | *****      |
|              |            |            |             |            |            |            |
|              | .... ....  | .... ....  | .... ....   | .... ....  | .... ....  | .... ....  |
|              | 845        | 855        | 865         | 875        | 885        | 895        |
| 2a_SalI      | GATAGGATGT | CAAATTTAA  | TGAAAAATC   | TATTCAATTT | TAAATAGTGT | GAAATGCACA |
| 2a_Thai      | GATAGGATGT | CAAATTTAA  | TGAAAAATC   | TATTCAATTT | TAAACAGTGT | GAAATGCACA |
| Conservation | *****      | *****      | *****       | *****      | **** *     | *****      |
|              |            |            |             |            |            |            |
|              | .... ....  | .... ....  | .... ....   | .... ....  | .... ....  | .... ....  |
|              | 905        | 915        | 925         | 935        | 945        | 955        |
| 2a_SalI      | GATGCATGTG | AAACTGATAC | GTACGAAATT  | ATGCTTGAAA | TATATGTAGA | AAGAGTAAAG |
| 2a_Thai      | GATGCATGTG | AAACTGATAC | GTACGAAATT  | ATGCTTGAAA | TATATGTAGA | AAGAGTAAAG |
| Conservation | *****      | *****      | *****       | *****      | *****      | *****      |
|              |            |            |             |            |            |            |
|              | .... ....  | .... ....  | .... ....   | .... ....  | .... ....  | .... ....  |
|              | 965        | 975        | 985         | 995        | 1005       | 1015       |
| 2a_SalI      | GAAGTTAATC | ATAATAATTA | TGTC AATTAT | TTGAGTACTT | TGAAAGCATC | TCTCCAATTG |
| 2a_Thai      | GAAGTTAATC | ATAATAATTA | TGTC AATTAT | TTGAGTACTT | TGAAAGCATC | TCTCCAATTG |
| Conservation | *****      | *****      | *****       | *****      | *****      | *****      |
|              |            |            |             |            |            |            |
|              | .... ....  | .... ....  | .... ....   | .... ....  | .... ....  | .... ....  |
|              | 1025       | 1035       | 1045        | 1055       | 1065       | 1075       |
| 2a_SalI      | GGGGTTACCC | TGATGCTCAA | AGTAAAACAA  | GAAATAGACA | ATAATGTCAC | CATTAGTGCA |
| 2a_Thai      | GGGGTTACCC | TGATGCTCAA | AGTAAAACAA  | GAAATAGACA | ATAATGTCAC | CATTAGTGCA |
| Conservation | *****      | *****      | *****       | *****      | *****      | *****      |
|              |            |            |             |            |            |            |
|              | .... ....  | .... ....  | .... ....   | .... ....  | .... ....  | .... ....  |
|              | 1085       | 1095       | 1105        | 1115       | 1125       | 1135       |
| 2a_SalI      | ATAAATTTT  | TACAAGAAGA | AATGTTAGAT  | ATCATCACAA | TAGGTGAAGC | TCACACAGGT |
| 2a_Thai      | ATAAATTTT  | TACAAGAAGA | AATGTTAGAT  | ATCATCACAA | TAGGTGAAGC | TCACACAGGT |
| Conservation | *****      | *****      | *****       | *****      | *****      | *****      |
|              |            |            |             |            |            |            |
|              | .... ....  | .... ....  | .... ....   | .... ....  | .... ....  | .... ....  |
|              | 1145       | 1155       | 1165        | 1175       | 1185       | 1195       |
| 2a_SalI      | AAAATTATAC | ATGGTAAGGA | AAACGTACTA  | AAACTTCAAA | ATAATAATAT | TCCACCACAA |
| 2a_Thai      | AAAATTATAC | ATGGTAAGGA | AAACGTACTA  | AAACTTCAAA | ATAATAATAT | TCCACCACAA |
| Conservation | *****      | *****      | *****       | *****      | *****      | *****      |



```

.....|.....| .....|.....| .....|.....| .....|.....| .....|.....|
      1205      1215      1225      1235      1245      1255
2a_SalI  GTCCCTTTAA GTACTCTTAA AAAATTATAT TTTGATTCCG CCAATTTCTA TGCCACTTAT
2a_Thai  GTCCCTTTAA GTACTCTTAA AAAATTATAT TTTGATTCCG CCAATTTCTA TGCCACTTAT
Conservation *****
.....|.....| .....|.....| .....|.....| .....|.....| .....|.....|
      1265      1275      1285      1295      1305      1315
2a_SalI  AAGTTTtagct TAAAAAGAGC CGATACCACG ACAGCTGCGC TAAAGGAAAA AGGAAAATTA
2a_Thai  AAGTTTtagct TAAAAAGAGC CGATACCACG ACAGCTGCGC TAAAGGAAAA AGGAAAATTA
Conservation *****
.....|.....| .....|.....| .....|.....| .....|.....| .....|.....|
      1325      1335      1345      1355      1365      1375
2a_SalI  CTTGCTAACc TTTATAATAA ATTGATAACA TATGTAAGCG AAAAAATAGA TAAAAATTTG
2a_Thai  CTTGCTAACc TTTATAATAA ATTGATAACA TATGTAAGCG AAAAAATAGA TAAAAATTTG
Conservation *****
.....|.....| .....|.....| .....|.....| .....|.....| .....|.....|
      1385      1395      1405      1415      1425      1435
2a_SalI  GATTCTTTAT ACTTCATTTC AAAAAGTGAA TCAATGATTT CCGAATTTGA AGATACCTTT
2a_Thai  GATTCTTTAT ACTTCATTTC AAAAAGTGAA TCAATGATTT CCGAATTTGA AGATACCTTT
Conservation *****
.....|.....| .....|.....| .....|.....| .....|.....| .....|.....|
      1445      1455      1465      1475      1485      1495
2a_SalI  AAAGCGGGAA CAGAAGCAAG CAAAGAAAAC TCCAGCATAA CAGCAGATTA CGCACGCTAT
2a_Thai  AAAGCGGGAA CAGAAGCAAG CAAAGAAAAC TCCAGCATAA CAGCAGATTA CGCACGCTAT
Conservation *****
.....|.....| .....|.....| .....|.....| .....|.....| .....|.....|
      1505      1515      1525      1535      1545      1555
2a_SalI  TCAAATTTGC AAATTATAGA TATCAAATCA AAGTACGATT ACAAATAAC CGAGTTAAAG
2a_Thai  TCAAATTTGC AAATTATAGA TATCAAATCA AAGTACGATT ACAAATAAC CGAGTTAAAG
Conservation *****
.....|.....| .....|.....| .....|.....| .....|.....| .....|.....|
      1565      1575      1585      1595      1605      1615
2a_SalI  AAATACTTAA ATCAATTAAA GGTACTCATT TCTCCTATGA AAGATTTATA TAATCTAAAT
2a_Thai  AAATACTTAA ATCAATTAAA GGTACTCATT TCTCCTATGA AAGATTTATA TAATCTAAAT
Conservation *****
.....|.....| .....|.....| .....|.....| .....|.....| .....|.....|
      1625      1635      1645      1655      1665      1675
2a_SalI  TCTCTACAAA AAGACCAAAG GGACAGTGTA AGAAGTATAC GCTCATCTGA TAGTAGTCCA
2a_Thai  TCTCTACAAA AAGACCAAAG GGACAGTGTA AGAAGTATAC GCTCATCTGA TAGTAGTCCA
Conservation *****
.....|.....| .....|.....| .....|.....| .....|.....| .....|.....|
      1685      1695      1705      1715      1725      1735
2a_SalI  CAAGAAAAGG TTAGCGCACT TTTAAACTTC TTATCAACAA TAAAGGAAGA GAATGGCACC
2a_Thai  CAAGAAAAGG TTAGCGCACT TTTAAACTTC TTATCAAAAA TAAAGGAAGA GAATGGCACC
Conservation *****
.....|.....| .....|.....| .....|.....| .....|.....| .....|.....|
      1745      1755      1765      1775      1785      1795
2a_SalI  GTGTTGGAGA ATTTTAAAAA TATAGAAAAG TATTATGAAC AAGGCAAGCC ATTTAAAAGGT
2a_Thai  GTGTTGGAGA ATTTTAAAAA TATAGAAAAG TATTATGAAC AAGGCAAGCC ATTTAAAAGGT
Conservation *****

```

|              |            |            |            |            |            |            |
|--------------|------------|------------|------------|------------|------------|------------|
|              | .... ....  | .... ....  | .... ....  | .... ....  | .... ....  | .... ....  |
|              | 1805       | 1815       | 1825       | 1835       | 1845       | 1855       |
| 2a_SalI      | ACACTCGAGG | GATTAATAAA | AATGATCAAA | ACCTACGAAC | AAGATATAGT | AAATTTAATT |
| 2a_Thai      | ACACTCGAGG | GATTAATAAA | AATGATCAAA | ACCTACGAAC | AAGATATAGT | AAATTTAATT |
| Conservation | *****      | *****      | *****      | *****      | *****      | *****      |
|              | .... ....  | .... ....  | .... ....  | .... ....  | .... ....  | .... ....  |
|              | 1865       | 1875       | 1885       | 1895       | 1905       | 1915       |
| 2a_SalI      | GATAACGAAA | AGCACACAG  | ATCGTACAAA | GATGACATAA | AAAACAAAAT | AATATATATA |
| 2a_Thai      | GATAACGAAA | AGCACACAG  | ATCGTACAAA | GATGACATAA | AAAACAAAAT | AATATATATA |
| Conservation | *****      | *****      | *****      | *****      | *****      | *****      |
|              | .... ....  | .... ....  | .... ....  | .... ....  | .... ....  | .... ....  |
|              | 1925       | 1935       | 1945       | 1955       | 1965       | 1975       |
| 2a_SalI      | ACCGAAAAAA | CAGATGCTAT | AAAAGACATT | ATCCCCTTAA | ATGAGGAAGT | AGACAATATC |
| 2a_Thai      | ACCGAAAAAA | CAGATGCTAT | AAAAGACATT | ATCCCCTTAA | ATGAGGAAGT | AGACAATATC |
| Conservation | *****      | *****      | *****      | *****      | *****      | *****      |
|              | .... ....  | .... ....  | .... ....  | .... ....  | .... ....  | .... ....  |
|              | 1985       | 1995       | 2005       | 2015       | 2025       | 2035       |
| 2a_SalI      | ATCAAACAAA | TTGAGAAACT | ATTCAATGAA | GACCTATTCC | ATGAAGGATT | ACCAAATATG |
| 2a_Thai      | ATCAAACAAA | TTGAGAAACT | ATTCAATGAA | GACCTATTCC | ATGAAGGATT | ACCAAATATG |
| Conservation | *****      | *****      | *****      | *****      | *****      | *****      |
|              | .... ....  | .... ....  | .... ....  | .... ....  | .... ....  | .... ....  |
|              | 2045       | 2055       | 2065       | 2075       | 2085       | 2095       |
| 2a_SalI      | GAAAACTTA  | AAAAAGAGAA | AGAAAAATA  | AAAGCTACTA | TAAAATCACT | CAACACTAAT |
| 2a_Thai      | GAAAACTTA  | AAAAAGAGAA | AGAAAAATA  | AAAGCTACTA | TAAAATCGCT | CAACACTAAT |
| Conservation | *****      | *****      | *****      | *****      | *****      | *****      |
|              | .... ....  | .... ....  | .... ....  | .... ....  | .... ....  | .... ....  |
|              | 2105       | 2115       | 2125       | 2135       | 2145       | 2155       |
| 2a_SalI      | TTCTACGACG | GAGACTTAAA | AGAATTAGTC | GACGATATGT | TAAATTTTGT | CTACAAACAC |
| 2a_Thai      | TTCTACGACG | GAGACTTAAA | AGAATTAGTC | GACGATATGT | TAAATTTTGT | CTACAAACAC |
| Conservation | *****      | *****      | *****      | *****      | *****      | *****      |
|              | .... ....  | .... ....  | .... ....  | .... ....  | .... ....  | .... ....  |
|              | 2165       | 2175       | 2185       | 2195       | 2205       | 2215       |
| 2a_SalI      | AGCGATTCT  | ACAATCAAGC | ATACGCTAAA | GGAGATGTTG | TAAATCTACA | AAAGGAAGCA |
| 2a_Thai      | AGCGATTCT  | ACGATCAAGC | ATACGCTAAA | GGAGATGTTG | TAAATCTACA | AAAGGAAGCA |
| Conservation | *****      | **_*****   | *****      | *****      | *****      | *****      |
|              | .... ....  | .... ....  | .... ....  | .... ....  | .... ....  | .... ....  |
|              | 2225       | 2235       | 2245       | 2255       | 2265       | 2275       |
| 2a_SalI      | GAACAAGAAT | ATGAAAAAAT | TACAAAACTA | AAATCGAATA | ACATTCCTCA | AATGTTAAAA |
| 2a_Thai      | GAACAAGAAT | ATGAAAAAAT | TACAAAACTA | AAATCGAATA | ACATTCCTCA | AATGTTAAAA |
| Conservation | *****      | *****      | *****      | *****      | *****      | *****      |
|              | .... ....  | .... ....  | .... ....  | .... ....  | .... ....  | .... ....  |
|              | 2285       | 2295       | 2305       | 2315       | 2325       | 2335       |
| 2a_SalI      | GATTTGAAAT | CAGAATCGAA | AAATCTTTCA | GAGCTTAAAG | ACACCATGAT | GGATGAAATG |
| 2a_Thai      | GATTTGAAAT | CAGAATCGAA | AAATCTTTCA | GAGCTTAAAG | ACACCATGAT | GGATGAAATG |
| Conservation | *****      | *****      | *****      | *****      | *****      | *****      |
|              | .... ....  | .... ....  | .... ....  | .... ....  | .... ....  | .... ....  |
|              | 2345       | 2355       | 2365       | 2375       | 2385       | 2395       |
| 2a_SalI      | TTGAACAATG | TTCATCAAGA | CATATCAAAC | GTTTTCGAAC | AGATAAGGAA | CAAAATATAA |
| 2a_Thai      | TTGAACAATG | TTCATCAAGA | CATATCAAAC | GTTTTCGAAC | AGATAAGGAA | CAAAATATAA |
| Conservation | *****      | *****      | *****      | *****      | *****      | *****      |

|              |            |            |            |              |             |            |
|--------------|------------|------------|------------|--------------|-------------|------------|
|              | .... ....  | .... ....  | .... ....  | .... ....    | .... ....   | .... ....  |
|              | 2405       | 2415       | 2425       | 2435         | 2445        | 2455       |
| 2a_SalI      | GACATAACAA | CCTCGCTCAG | TGCCTACAAA | GAGGACAAAC   | AGAAATTCTGA | GAAATTTAAA |
| 2a_Thai      | GACATAACAA | CCTCGCTCAG | TGCCTACAAA | GAGGACAAAC   | AGAAATTCTGA | GAAATTTAAA |
| Conservation | *****      | *****      | *****      | *****        | *****       | *****      |
|              | .... ....  | .... ....  | .... ....  | .... ....    | .... ....   | .... ....  |
|              | 2465       | 2475       | 2485       | 2495         | 2505        | 2515       |
| 2a_SalI      | GTCGATATGA | TACAGACGAA | AAACGAACTC | CTGGGGAGTC   | TTCAACAAAA  | TGATAAAAAA |
| 2a_Thai      | GTCGATATGA | TACAGACGAA | AAACGAACTC | CTGGGGAGTC   | TTCAACAAAA  | TGATAAAAAA |
| Conservation | *****      | *****      | *****      | *****        | *****       | *****      |
|              | .... ....  | .... ....  | .... ....  | .... ....    | .... ....   | .... ....  |
|              | 2525       | 2535       | 2545       | 2555         | 2565        | 2575       |
| 2a_SalI      | CTCTCAGAAG | CAAATAATAT | GTATGAAGAA | TTCTTGCGCG   | ACATAGATAC  | TACTACCAAT |
| 2a_Thai      | CTCTCAGAAG | CAAATAATAT | GTATGAAGAA | TTCTTGCGCG   | ACATAGATAC  | TACTACCAAT |
| Conservation | *****      | *****      | *****      | *****        | *****       | *****      |
|              | .... ....  | .... ....  | .... ....  | .... ....    | .... ....   | .... ....  |
|              | 2585       | 2595       | 2605       | 2615         | 2625        | 2635       |
| 2a_SalI      | AGAGAAAAGC | AAATGTATAA | CCAAGCCAAC | GCGTTAAAGG   | AAAATTTAGC  | AAATGTTCAA |
| 2a_Thai      | AGAGAAAAGC | AAATGTATAA | CCAAGCCAAC | GCGTTAAAGG   | AAAATTTAGC  | AAATGTTCAA |
| Conservation | *****      | *****      | *****      | *****        | *****       | *****      |
|              | .... ....  | .... ....  | .... ....  | .... ....    | .... ....   | .... ....  |
|              | 2645       | 2655       | 2665       | 2675         | 2685        | 2695       |
| 2a_SalI      | AGTAAAATAT | CATCGTACCA | GGGAAAAATA | GAAAAATTGA   | AAGCGCATAc  | TAGGAAAAAT |
| 2a_Thai      | AGTAAAATAT | CATCGTACCA | GGGAAAAATA | GAAAAATTGA   | AAGCGCATAc  | TAGGAAAAAT |
| Conservation | *****      | *****      | *****      | *****        | *****       | *****      |
|              | .... ....  | .... ....  | .... ....  | .... ....    | .... ....   | .... ....  |
|              | 2705       | 2715       | 2725       | 2735         | 2745        | 2755       |
| 2a_SalI      | TATGAAAAAA | TTAAGACATT | ACTGCAAACt | TTTGCCAATG   | AAAATATAAA  | CGCAAAACTG |
| 2a_Thai      | TATGAAAAAA | TTAAGACATT | ACTGCAAACt | TTTGCCAATG   | AAAATATAAA  | CGCAAAACTG |
| Conservation | *****      | *****      | *****      | *****        | *****       | *****      |
|              | .... ....  | .... ....  | .... ....  | .... ....    | .... ....   | .... ....  |
|              | 2765       | 2775       | 2785       | 2795         | 2805        | 2815       |
| 2a_SalI      | GCAGAATACG | AAAAAGAATT | TAATGAAAAT | AAGAGAGTAG   | TGAATACCAT  | CATAAACCAA |
| 2a_Thai      | GCAGAATACG | AAAAAGAATT | TAATGAAAAT | AAGNAAGTAG   | TGAATACCAT  | CATAAACCAA |
| Conservation | *****      | *****      | *****      | *** .*****   | *****       | *****      |
|              | .... ....  | .... ....  | .... ....  | .... ....    | .... ....   | .... ....  |
|              | 2825       | 2835       | 2845       | 2855         | 2865        | 2875       |
| 2a_SalI      | ATTCAAGAAT | CAAACAAAAA | TATAGAGAAT | ATTA AAAATAT | TAAATAATTC  | TATCGACCGT |
| 2a_Thai      | ATTCAAGAAT | CAAACAAAAA | TATAGAGAAT | ATTA AAAATAT | TAAATAATTC  | TATCGACCGT |
| Conservation | *****      | *****      | *****      | *****        | *****       | *****      |
|              | .... ....  | .... ....  | .... ....  | .... ....    | .... ....   | .... ....  |
|              | 2885       | 2895       | 2905       | 2915         | 2925        | 2935       |
| 2a_SalI      | TCTGAAGTGA | ACAAACAGCT | GATAGAAGAA | TTGGCCACCA   | ATAAGCAACA  | ATTAAAGGAA |
| 2a_Thai      | TCTGAAGTGA | ACAAACAGCT | GATAGAAGAA | TTGGCCACCA   | ATAAGCAACA  | ATTAAAGGAA |
| Conservation | *****      | *****      | *****      | *****        | *****       | *****      |
|              | .... ....  | .... ....  | .... ....  | .... ....    | .... ....   | .... ....  |
|              | 2945       | 2955       | 2965       | 2975         | 2985        | 2995       |
| 2a_SalI      | AAAATAGATA | GTCACATTAA | GCAACTAAAC | AGTTACAATA   | TCATTGCAAA  | AGATGATAAG |
| 2a_Thai      | AAAATAGATA | GTCACATTAA | GCAACTAAAC | AGTTACAATA   | TCATTGCAAA  | AGATGATAAG |
| Conservation | *****      | *****      | *****      | *****        | *****       | *****      |

|              |            |            |            |            |            |            |
|--------------|------------|------------|------------|------------|------------|------------|
|              | .... ....  | .... ....  | .... ....  | .... ....  | .... ....  | .... ....  |
|              | 3005       | 3015       | 3025       | 3035       | 3045       | 3055       |
| 2a_SalI      | CTAATTTTGG | AGAAAAGGTT | AAATGAGGAG | AAGGCAAATA | TTAACACGCA | ACTAAGCGAC |
| 2a_Thai      | CTAATTTTGG | AGAAAACGTT | AAATGAGGAG | AAGGCAAATA | TTAACACGCA | ACTAAGCGAC |
| Conservation | *****      | ***** **   | *****      | *****      | *****      | *****      |
|              |            |            |            |            |            |            |
|              | .... ....  | .... ....  | .... ....  | .... ....  | .... ....  | .... ....  |
|              | 3065       | 3075       | 3085       | 3095       | 3105       | 3115       |
| 2a_SalI      | ACGTCAATAG | ATAATTTAAA | AGCACAAATA | CAAGAAACGC | TAGATTATTA | CAAAACAGCA |
| 2a_Thai      | ACGTCAATAG | ATAATTTAAA | AGCACAAATA | CAAGAAACGC | TAGATTATTA | CAAAACAGCA |
| Conservation | *****      | *****      | *****      | *****      | *****      | *****      |
|              |            |            |            |            |            |            |
|              | .... ....  | .... ....  | .... ....  | .... ....  | .... ....  | .... ....  |
|              | 3125       | 3135       | 3145       | 3155       | 3165       | 3175       |
| 2a_SalI      | AAGGCAAACA | CGAATGATAA | AGATGGAACC | CATTTAGAAA | AATTAGATAA | AAAAAAAATG |
| 2a_Thai      | AAGGCAAACA | CGAATGATAA | AGATGGAACC | CATTTAGAAA | AATTAGATAA | AAAAAAAATG |
| Conservation | *****      | *****      | *****      | *****      | *****      | *****      |
|              |            |            |            |            |            |            |
|              | .... ....  | .... ....  | .... ....  | .... ....  | .... ....  | .... ....  |
|              | 3185       | 3195       | 3205       | 3215       | 3225       | 3235       |
| 2a_SalI      | GATTGGAAAG | ACAGCAAAGT | TAAAATAGAT | AAATTAAGCA | CCAGCTATCA | AGTGCTAGAT |
| 2a_Thai      | GATTGGAAAG | ACAGCAAAGT | TAAAATAGAT | NAATTAAGCC | CCAGCTATCA | AGTGCTAGAT |
| Conservation | *****      | *****      | *****      | *****      | *****      | *****      |
|              |            |            |            |            |            |            |
|              | .... ....  | .... ....  | .... ....  | .... ....  | .... ....  | .... ....  |
|              | 3245       | 3255       | 3265       | 3275       | 3285       | 3295       |
| 2a_SalI      | AAAAAATTA  | ATGATTTGAT | TAAAAAGCAA | CACGACGAAA | TTGTAGCTCT | CATTGATAAA |
| 2a_Thai      | AAAAAATTA  | ATGATTTGAT | TAAAAAGCAA | CCCGACGAAA | TTGTAGCTCT | CATTGATAAA |
| Conservation | *****      | *****      | *****      | *.*****    | *****      | *****      |
|              |            |            |            |            |            |            |
|              | .... ....  | .... ....  | .... ....  | .... ....  | .... ....  | .... ....  |
|              | 3305       | 3315       | 3325       | 3335       | 3345       | 3355       |
| 2a_SalI      | CTTATAACAG | AAAAGGGCAA | TGAAATAAGG | GAGAAAACCG | ACGAAAAAAT | AAAGCACCTT |
| 2a_Thai      | CTTATAACAG | AAAAGGGCAA | TGAAATAAGG | GAGAAAACCG | ACGAAAAAAT | AAAGCACCTT |
| Conservation | *****      | *****      | *****      | *****      | *****      | *****      |
|              |            |            |            |            |            |            |
|              | .... ....  | .... ....  | .... ....  | .... ....  | .... ....  | .... ....  |
|              | 3365       | 3375       | 3385       | 3395       | 3405       | 3415       |
| 2a_SalI      | AGCGAAATAA | AAACAAAATT | GTCCTCTTTC | ACTGTCTCCG | ATAATGTTAA | GAATACCCAA |
| 2a_Thai      | AGCGAAATAA | AAACAAAATT | GTCCTCTTTC | ACTGTCTCCG | ATAATGTTAA | GAATACCCAA |
| Conservation | *****      | *****      | *****      | *****      | *****      | *****      |
|              |            |            |            |            |            |            |
|              | .... ....  | .... ....  | .... ....  | .... ....  | .... ....  | .... ....  |
|              | 3425       | 3435       | 3445       | 3455       | 3465       | 3475       |
| 2a_SalI      | AATGTTGCAA | TAAAAGGGGA | AATAAGTGGA | TTCGAAAAAA | AAATGGAAGC | CCTATTAAGA |
| 2a_Thai      | AATGTTGCAA | TAAAAGGGGA | AATAAGTGGA | TTCGAAAAAA | AAATGGAAGC | CCTATTAAGA |
| Conservation | *****      | *****      | *****      | *****      | *****      | *****      |
|              |            |            |            |            |            |            |
|              | .... ....  | .... ....  | .... ....  | .... ....  | .... ....  | .... ....  |
|              | 3485       | 3495       | 3505       | 3515       | 3525       | 3535       |
| 2a_SalI      | AGAATAGACA | ATAATAACGC | AAAATTAACT | GAAGTCTCCG | GGAAGGCAGA | CCAACATGTA |
| 2a_Thai      | AGAATAGACA | ATAATAACGC | AAAATTAACT | GAAGTCTCCG | GGAAGGCAGA | CCAACATGTA |
| Conservation | *****      | *****      | *****      | *****      | *****      | *****      |
|              |            |            |            |            |            |            |
|              | .... ....  | .... ....  | .... ....  | .... ....  | .... ....  | .... ....  |
|              | 3545       | 3555       | 3565       | 3575       | 3585       | 3595       |
| 2a_SalI      | ACCACCCTAC | GTGGGGAAAA | AAATAAAACA | GCTGAATTCA | ATGCGAAAAA | AGATAGCCTG |
| 2a_Thai      | ACCACCCTAC | GTGGGGAAAA | AAATAAAACA | GCTGAATTCA | ATGCGAAAAA | AGATAGCCTG |
| Conservation | *****      | *****      | *****      | *****      | *****      | *****      |

|              |             |            |             |            |            |             |
|--------------|-------------|------------|-------------|------------|------------|-------------|
|              | .... ....   | .... ....  | .... ....   | .... ....  | .... ....  | .... ....   |
|              | 3605        | 3615       | 3625        | 3635       | 3645       | 3655        |
| 2a_SalI      | GAAAAAATAC  | ACCAACAAAT | GGAAAAATACG | CATAAAGAAT | TGGAGAGCAT | GGAAAAATGAA |
| 2a_Thai      | GAAAAAATAC  | ACCAACAAAT | GGAAAAATACG | CATAAAGAAT | TGGAGAGCAT | GGAAAAATGAA |
| Conservation | *****       | *****      | *****       | *****      | *****      | *****       |
|              |             |            |             |            |            |             |
|              | .... ....   | .... ....  | .... ....   | .... ....  | .... ....  | .... ....   |
|              | 3665        | 3675       | 3685        | 3695       | 3705       | 3715        |
| 2a_SalI      | AAAATTCCCA  | TAAACGACAT | TAACCAAATG  | GAAATAGAAT | ATGCACGAAT | TTTAATTCAT  |
| 2a_Thai      | AAAATTCCCA  | TAAACGACAT | TAACCAAATG  | GAAATAGAAT | ATGCACGAAT | TTTAATTCAT  |
| Conservation | *****       | *****      | *****       | *****      | *****      | *****       |
|              |             |            |             |            |            |             |
|              | .... ....   | .... ....  | .... ....   | .... ....  | .... ....  | .... ....   |
|              | 3725        | 3735       | 3745        | 3755       | 3765       | 3775        |
| 2a_SalI      | CATATGGTTC  | AACAAATTGG | TGAAAAAAG   | GAAAGGTCTA | AAATCATCTT | AGAAGAGATT  |
| 2a_Thai      | CATATGGTTC  | AACAAATTGG | TGAAAAAAG   | GAAAGGTCTA | AAATCATCTT | AGAAGAGATT  |
| Conservation | *****       | *****      | *****       | *****      | *****      | *****       |
|              |             |            |             |            |            |             |
|              | .... ....   | .... ....  | .... ....   | .... ....  | .... ....  | .... ....   |
|              | 3785        | 3795       | 3805        | 3815       | 3825       | 3835        |
| 2a_SalI      | AAAACAACATA | TAGCAAGCAT | CGATCAAGCA  | AAGAAAAATA | TACCTCCTGA | GCAACAAGAT  |
| 2a_Thai      | AAAACAACATA | TAGCAAGCAT | CGATCAAGCA  | AAGAAAAATA | TACCTCCTGA | GCAACAAGAT  |
| Conservation | *****       | *****      | *****       | *****      | *****      | *****       |
|              |             |            |             |            |            |             |
|              | .... ....   | .... ....  | .... ....   | .... ....  | .... ....  | .... ....   |
|              | 3845        | 3855       | 3865        | 3875       | 3885       | 3895        |
| 2a_SalI      | ATCCTTCGCG  | AATTCGAGTA | TAGCGGATAT  | CGCGACAAAG | CTACTGCCAG | TAGTACCGAA  |
| 2a_Thai      | ATCCTTCGCG  | AATTCGAGTA | TAGCGGATAT  | CGCGACAAAG | CTACTGCCAG | TAGTACCGAA  |
| Conservation | *****       | *****      | *****       | *****      | *****      | *****       |
|              |             |            |             |            |            |             |
|              | .... ....   | .... ....  | .... ....   | .... ....  | .... ....  | .... ....   |
|              | 3905        | 3915       | 3925        | 3935       | 3945       | 3955        |
| 2a_SalI      | ATAGAACAAA  | TTGATAAAAG | TGCAAAAGCA  | GAGGAGGGTA | AAGCCAACAG | TAGCACCAAC  |
| 2a_Thai      | ATAGAACAAA  | TTGATAAAAG | TGCAAAAGCA  | GAGGAGGGTA | AAGCCAACAG | TAGCACCAAC  |
| Conservation | *****       | *****      | *****       | *****      | *****      | *****       |
|              |             |            |             |            |            |             |
|              | .... ....   | .... ....  | .... ....   | .... ....  | .... ....  | .... ....   |
|              | 3965        | 3975       | 3985        | 3995       | 4005       | 4015        |
| 2a_SalI      | TTAAGCGACA  | TTGATGTGAT | TAAAAAACAG  | GTACTGTCCT | ACTTCAGAAA | AGCCACCACT  |
| 2a_Thai      | TTAAGCGACA  | TTGATGTGAT | TAAAAAACAG  | GTACTGTCCT | ACTTCAGAAA | AGCCACCACT  |
| Conservation | *****       | *****      | *****       | *****      | *****      | *****       |
|              |             |            |             |            |            |             |
|              | .... ....   | .... ....  | .... ....   | .... ....  | .... ....  | .... ....   |
|              | 4025        | 4035       | 4045        | 4055       | 4065       | 4075        |
| 2a_SalI      | GAAAGTAACA  | CCATGGAAAA | TGCGTTAAGA  | GAAATTAAAA | ATGTGAACAC | TTTCTTAACA  |
| 2a_Thai      | GAAAGTAACA  | CCATGGAAAA | TGCGTTAAGA  | GAAATTAAAA | ATGTGAACAC | TTTCTTAACA  |
| Conservation | *****       | *****      | *****       | *****      | *****      | *****       |
|              |             |            |             |            |            |             |
|              | .... ....   | .... ....  | .... ....   | .... ....  | .... ....  | .... ....   |
|              | 4085        | 4095       | 4105        | 4115       | 4125       | 4135        |
| 2a_SalI      | TCAAACATTT  | CAGAAGAAAT | TTTAGCTAAC  | ATACTAAAGA | GTGCAGCGAG | GACCCAAGAA  |
| 2a_Thai      | TCAAACATTT  | CAGAAGAAAT | TTTAGCTAAC  | ATACTAAAGA | GTGCAGCGAG | GACCCAAGAA  |
| Conservation | *****       | *****      | *****       | *****      | *****      | *****       |
|              |             |            |             |            |            |             |
|              | .... ....   | .... ....  | .... ....   | .... ....  | .... ....  | .... ....   |
|              | 4145        | 4155       | 4165        | 4175       | 4185       | 4195        |
| 2a_SalI      | TTAAATCAAC  | AAGCGGTAGG | CGAATTTAAC  | AAAACAGATC | GTCTAATTAA | AGAAGTAGAA  |
| 2a_Thai      | TTAAATCAAC  | AAGCGGTAGG | CGAATTTAAC  | AAAACAGATC | GTCTAATTAA | AGAAGTAGAA  |
| Conservation | *****       | *****      | *****       | *****      | *****      | *****       |

|              |            |            |            |            |            |            |
|--------------|------------|------------|------------|------------|------------|------------|
|              | .... ....  | .... ....  | .... ....  | .... ....  | .... ....  | .... ....  |
|              | 4205       | 4215       | 4225       | 4235       | 4245       | 4255       |
| 2a_SalI      | GCGAAGCTAT | CCCAGGCAAA | CGAACATAAA | TCAGCAATTT | CAGGAAGTGT | AGAATACAAA |
| 2a_Thai      | GCGAAGCTAT | CCCAGGCAAA | CGAACATAAA | TCAGCAATTT | CAGGAAGTGT | AGAATACAAA |
| Conservation | *****      | *****      | *****      | *****      | *****      | *****      |
|              |            |            |            |            |            |            |
|              | .... ....  | .... ....  | .... ....  | .... ....  | .... ....  | .... ....  |
|              | 4265       | 4275       | 4285       | 4295       | 4305       | 4315       |
| 2a_SalI      | CAAATCGAAC | AGAAAATAAA | CCTAATTAAA | CAAATTCAGA | AAGAAATTAC | GGCGGGGAAA |
| 2a_Thai      | CAAATCGAAC | AGAAAATAAA | CCTAATTAAA | CAAATTCAGA | AAGAAATTAC | GGCGGGGAAA |
| Conservation | *****      | *****      | *****      | *****      | *****      | *****      |
|              |            |            |            |            |            |            |
|              | .... ....  | .... ....  | .... ....  | .... ....  | .... ....  | .... ....  |
|              | 4325       | 4335       | 4345       | 4355       | 4365       | 4375       |
| 2a_SalI      | GAAGAAATAA | ACAACGTGTT | AAGTAATACC | AAAGAATATA | AAGAAAAATG | CGAGTCTGAA |
| 2a_Thai      | GAAGAAATAA | ACAACGTGTT | AAGTAATACC | AAAGAATATA | AAGAAAAATG | CGAGTCTGAA |
| Conservation | *****      | *****      | *****      | *****      | *****      | *****      |
|              |            |            |            |            |            |            |
|              | .... ....  | .... ....  | .... ....  | .... ....  | .... ....  | .... ....  |
|              | 4385       | 4395       | 4405       | 4415       | 4425       | 4435       |
| 2a_SalI      | GTGAATTCAG | TAAATAGAGG | AAAAGCTAAA | GTAGATTTTC | TGCAAAAAAG | GGAAGCGCTA |
| 2a_Thai      | GTGAATTCAG | TAAATAGAGG | AAAAGCTAAA | GTAGATTTTC | TGCAAAAAAG | GGAAGCGCTA |
| Conservation | *****      | *****      | *****      | *****      | *****      | *****      |
|              |            |            |            |            |            |            |
|              | .... ....  | .... ....  | .... ....  | .... ....  | .... ....  | .... ....  |
|              | 4445       | 4455       | 4465       | 4475       | 4485       | 4495       |
| 2a_SalI      | GAAAAAATAA | TGAGTCAAGA | AAATTTGGGT | AAAATTACAG | ATAGCATTGA | TCAATGCAAA |
| 2a_Thai      | GAAAAAATAA | TGAGTCAAGA | AAATTTGGGT | AAAATTACAG | ATAGCATTGA | TCAATGCAAA |
| Conservation | *****      | *****      | *****      | *****      | *****      | *****      |
|              |            |            |            |            |            |            |
|              | .... ....  | .... ....  | .... ....  | .... ....  | .... ....  | .... ....  |
|              | 4505       | 4515       | 4525       | 4535       | 4545       | 4555       |
| 2a_SalI      | AAAGATTTAG | CAGACATTAC | TAGTTTAGAA | GTAAGGTTA  | AAGCTAATTA | CGATTCAATC |
| 2a_Thai      | AAAGATTTAG | CAGACATTAC | TAGTTTAGAA | GTAAGGTTA  | AAGCTAATTA | CGATTCAATC |
| Conservation | *****      | *****      | *****      | *****      | *****      | *****      |
|              |            |            |            |            |            |            |
|              | .... ....  | .... ....  | .... ....  | .... ....  | .... ....  | .... ....  |
|              | 4565       | 4575       | 4585       | 4595       | 4605       | 4615       |
| 2a_SalI      | ATTAAGTATG | AAGAATCCAT | TAATACCATT | TTAAATTATT | CCTCCATTTT | AGAATACAAA |
| 2a_Thai      | ATTAAGTATG | AAGAATCCAT | TAATACCATT | TTAAATTATT | CCTCCATTTT | AGAATACAAA |
| Conservation | *****      | *****      | *****      | *****      | *****      | *****      |
|              |            |            |            |            |            |            |
|              | .... ....  | .... ....  | .... ....  | .... ....  | .... ....  | .... ....  |
|              | 4625       | 4635       | 4645       | 4655       | 4665       | 4675       |
| 2a_SalI      | ACCAAATTGG | AAATACGCAA | AAAAGAAAAA | ACAGACCTCA | TGACTTATAT | TAACACAGAA |
| 2a_Thai      | ACCAAATTGG | AAATACGCAA | AAAAGAAAAA | ACAGACCTCA | TGACTTATAT | TAACACAGAA |
| Conservation | *****      | *****      | *****      | *****      | *****      | *****      |
|              |            |            |            |            |            |            |
|              | .... ....  | .... ....  | .... ....  | .... ....  | .... ....  | .... ....  |
|              | 4685       | 4695       | 4705       | 4715       | 4725       | 4735       |
| 2a_SalI      | AATTCTGCCA | TTCAGGAGAA | GCTGCTAAAC | TTGCAAAAAA | AATTGAACCA | ATTGAATGAA |
| 2a_Thai      | AATTCTGCCA | TTCAGGAGAA | GCTGCTAAAC | TTGCAAAAAA | AATTGAACCA | ATTGAATGAA |
| Conservation | *****      | *****      | *****      | *****      | *****      | *****      |
|              |            |            |            |            |            |            |
|              | .... ....  | .... ....  | .... ....  | .... ....  | .... ....  | .... ....  |
|              | 4745       | 4755       | 4765       | 4775       | 4785       | 4795       |
| 2a_SalI      | AACACGGACT | ATACTAAAGT | GGGAAACGAT | CTCAACAACG | CAAAGTCTAC | AAAAGCAAAT |
| 2a_Thai      | AACACGGACT | ATACTAAAGT | GGGAAACGAT | CTCAACAACG | CAAAGTCTAC | AAAAGCAAAT |
| Conservation | *****      | *****      | *****      | *****      | *****      | *****      |

```

      ....|....| ....|....| ....|....| ....|....| ....|....| ....|....|
      4805      4815      4825      4835      4845      4855
2a_SalI      GTAACTATCC AGTATAACTT AGGACGAGTC AAACATCAAC TGGAAAATTT AAGTGTCTATC
2a_Thai      GTAATTATCC AGTATAACTT AGGACGAGTC AAACATCAAC TGGAAAATGT AAGTGTCTATC
Conservation *****
      ....|....| ....|....| ....|....| ....|....| ....|....|
      4865      4875      4885      4895      4905      4915
2a_SalI      AAACAGGAGC TAGAAAAAGT CCTAAGTGCA GCTACCGATT TAGAGAGGGA CATCTCAAAA
2a_Thai      AAACAGGAGC TAGAAAAAGT CCTAAGTGCA GCTACCGATT TAGAGAGGGA CATCTCAAAA
Conservation *****
      ....|....| ....|....| ....|....| ....|....| ....|....|
      4925      4935      4945      4955      4965      4975
2a_SalI      ATAGCCGACG TCACAGAATC TAATAACTTG GAGAGCCTAA ATGGGAAGGA AGCAGATTAC
2a_Thai      ATAGCCGACG TCACAGAATC TAATAACTTG GAGAGCCTAA ATGGGAAGGA AGCAGATTAC
Conservation *****
      ....|....| ....|....| ....|....| ....|....| ....|....|
      4985      4995      5005      5015      5025      5035
2a_SalI      ACGAAACGTA TAAGAAGTTT TAACAAATTG AAGCAGCTCG TGCAAGAGAA AGCAGCAAAA
2a_Thai      ACGAAACGTA TAAGAAGTTT TAACAAATTG AAGCAGCTCG TGCAAGAGAA AGCAGCAAAA
Conservation *****
      ....|....| ....|....| ....|....| ....|....| ....|....|
      5045      5055      5065      5075      5085      5095
2a_SalI      GTAGAAGAAA TTTCTCCGA TACGGATAAC ATAGAAAAAG AACTGACAGA ACATAAAATA
2a_Thai      GTAGAAGAAA TTTCTCCGA TACGGATAAC ATAGAAAAAG AACTGACAGA ACATAAAATA
Conservation *****
      ....|....| ....|....| ....|....| ....|....| ....|....|
      5105      5115      5125      5135      5145      5155
2a_SalI      ATTTTTGAAG TGGGACTTAC CGAAAGGTTA ATCGAAATAG TTAAAAATAG AAAATCATAC
2a_Thai      ATTTTTGAAG TGGGACTTAC CGAAAGGTTA ATCGAAATAG TTAAAAATAG AAAATCATAC
Conservation *****
      ....|....| ....|....| ....|....| ....|....| ....|....|
      5165      5175      5185      5195      5205      5215
2a_SalI      GTAGACACAA CAAAGGAATT GCTAAATTCA TCATTAAACA ATTTTGCTTC CCTCTTTAAT
2a_Thai      GTAGACACAA CAAAGGAATT GCTAAATTCA TCATTAAACA ATTTTGCTTC CCTCTTTAAT
Conservation *****
      ....|....| ....|....| ....|....| ....|....| ....|....|
      5225      5235      5245      5255      5265      5275
2a_SalI      GGATTGGACT TAAATGGATA CAATCCAAAA GCAAACCTAG AAATGTACAC ACAAAAACTG
2a_Thai      GGATTGGACT TAAAAGGATA CAATCCAAAA GCAAACCTAG AAATGTACAC ACAAAAACTG
Conservation *****
      ....|....| ....|....| ....|....| ....|....| ....|....|
      5285      5295      5305      5315      5325      5335
2a_SalI      AACACAATAC ATAACGAATT TATGGCATCT CACAAAATAT TTGATGAAAA ATCAAAGAAG
2a_Thai      AACACAATAC ATAACGAATT TATGGCATCT CACAAAATAT TTGATGAAAA ATCAAAGAAG
Conservation *****
      ....|....| ....|....| ....|....| ....|....| ....|....|
      5345      5355      5365      5375      5385      5395
2a_SalI      GTCTTAGACA AAGATGTGAA CTTACGGAA GCTAAAACAC TCAGGGAGGA GGCGCAAAAA
2a_Thai      GTCTTAGACA AAGATGTGAA CTTACGGAA GCTAAAACAC TCAGGGAGGA GGCGCAAAAA
Conservation *****

```

|              |            |            |             |            |            |            |
|--------------|------------|------------|-------------|------------|------------|------------|
|              | .... ....  | .... ....  | .... ....   | .... ....  | .... ....  | .... ....  |
|              | 5405       | 5415       | 5425        | 5435       | 5445       | 5455       |
| 2a_SalI      | GAAGATGTTA | CTCTTAAAAA | TAAAGAGGAA  | GAAGCAAAAT | CGTACTTGAG | TGATATCAAA |
| 2a_Thai      | GAAGATGTTA | CTCTTAAAAA | TAAAGAGGAA  | GAAGCAAAAT | CGTACTTGAG | TGATATCAAA |
| Conservation | *****      | *****      | *****       | *****      | *****      | *****      |
|              |            |            |             |            |            |            |
|              | .... ....  | .... ....  | .... ....   | .... ....  | .... ....  | .... ....  |
|              | 5465       | 5475       | 5485        | 5495       | 5505       | 5515       |
| 2a_SalI      | AAAAAAGAAT | CTTTCGAATT | TATACTTCAC  | ATGAAGGAAA | AATTAAACCA | AATTAGTAAA |
| 2a_Thai      | AAAAAAGAAT | CTTTCGAATT | TATACTTCAC  | ATGAAGGAAA | AATTAAACCA | AATTAGTAAA |
| Conservation | *****      | *****      | *****       | *****      | *****      | *****      |
|              |            |            |             |            |            |            |
|              | .... ....  | .... ....  | .... ....   | .... ....  | .... ....  | .... ....  |
|              | 5525       | 5535       | 5545        | 5555       | 5565       | 5575       |
| 2a_SalI      | ATGTGTGAAC | AGCAATATGA | ACAAGCTGAT  | AAAGGCTATA | GTGAAGTCAA | AACAAGCATT |
| 2a_Thai      | ATGTGTGAAC | AGCAATATGA | ACAAGCTGAT  | AAAGGCTATA | GTGAAGTCAA | AACAAGCATT |
| Conservation | *****      | *****      | *****       | *****      | *****      | *****      |
|              |            |            |             |            |            |            |
|              | .... ....  | .... ....  | .... ....   | .... ....  | .... ....  | .... ....  |
|              | 5585       | 5595       | 5605        | 5615       | 5625       | 5635       |
| 2a_SalI      | GATCGCATTG | CAAATTTAAA | TGATGAAAAT  | AGTATAGCGG | ATGTACTCAA | AGAAGCAAAC |
| 2a_Thai      | GATCGCATTG | CAAATTTAAA | TGATGAAAAT  | AGTATAGCGG | ATGTACTCAA | AGAAGCAAAC |
| Conservation | *****      | *****      | *****       | *****      | *****      | *****      |
|              |            |            |             |            |            |            |
|              | .... ....  | .... ....  | .... ....   | .... ....  | .... ....  | .... ....  |
|              | 5645       | 5655       | 5665        | 5675       | 5685       | 5695       |
| 2a_SalI      | GATAAAAATG | AGCAAGTACA | AAATCTGACA  | CATTATACAT | ATAAAAATGA | AGCACAAAAT |
| 2a_Thai      | GATAAAAATG | AGCAAGTACA | AAATCTGACA  | CATTATACAT | ATAAAAATGA | AGCACAAAAT |
| Conservation | *****      | *****      | *****       | *****      | *****      | *****      |
|              |            |            |             |            |            |            |
|              | .... ....  | .... ....  | .... ....   | .... ....  | .... ....  | .... ....  |
|              | 5705       | 5715       | 5725        | 5735       | 5745       | 5755       |
| 2a_SalI      | GTGCTAAGGC | ATATGGCAAA | GTCGGCAAAT  | TTTATAGGCA | TTAACCTAGT | AACAGGAATA |
| 2a_Thai      | GTGCTAAGGC | ATATGGCAAA | GTCGGCAAAT  | TTTATAGGCA | TTAACCTAGT | AACAGGAATA |
| Conservation | *****      | *****      | *****       | *****      | *****      | *****      |
|              |            |            |             |            |            |            |
|              | .... ....  | .... ....  | .... ....   | .... ....  | .... ....  | .... ....  |
|              | 5765       | 5775       | 5785        | 5795       | 5805       | 5815       |
| 2a_SalI      | CAACCGACGG | AATTATCATC | ACAAGCAAAGC | GAATCGACAA | CGCCAGAGTT | AAAATTTGAA |
| 2a_Thai      | CAACCGACGG | AATTATCATC | ACAAGCAAAGC | GAATCGACAA | CGCCAGAGTT | AAAATTTGAA |
| Conservation | *****      | *****      | *****       | *****      | *****      | *****      |
|              |            |            |             |            |            |            |
|              | .... ....  | .... ....  | .... ....   | .... ....  | .... ....  | .... ....  |
|              | 5825       | 5835       | 5845        | 5855       | 5865       | 5875       |
| 2a_SalI      | TCAGAAGGGG | AAATGAAATT | GGAAATCTTA  | ACATTATCAG | GAAATACTAC | AAAATTGGAC |
| 2a_Thai      | TCAGAAGGGG | AAATGAAATT | GGAAATCTTA  | ACATTATCAG | GAAATACTAC | AAAATTGGAC |
| Conservation | *****      | *****      | *****       | *****      | *****      | *****      |
|              |            |            |             |            |            |            |
|              | .... ....  | .... ....  | .... ....   | .... ....  | .... ....  | .... ....  |
|              | 5885       | 5895       | 5905        | 5915       | 5925       | 5935       |
| 2a_SalI      | TATTATAAAA | ATATGAAAGA | CGCCTACCAG  | AGCGTCCTTT | CCATATTTAA | ATACTCTCAT |
| 2a_Thai      | TATTATAAAA | ATATGAAAGA | CGCCTACCAG  | AGCGTCCTTT | CCATATTTAA | ATACTCTCAT |
| Conservation | *****      | *****      | *****       | *****      | *****      | *****      |
|              |            |            |             |            |            |            |
|              | .... ....  | .... ....  | .... ....   | .... ....  | .... ....  | .... ....  |
|              | 5945       | 5955       | 5965        | 5975       | 5985       | 5995       |
| 2a_SalI      | GGTATAGACG | AAAAACAAAG | AGAAAGCCAA  | AAAATAACCG | AAAGTGCAAA | TGGCTCATAT |
| 2a_Thai      | GGTATAGACG | AAAAACAAAG | AGAAAGCCAA  | AAAATAACCG | AAAGTGCAAA | TGGCTCATAT |
| Conservation | *****      | *****      | *****       | *****      | *****      | *****      |



|              |            |            |            |            |            |            |
|--------------|------------|------------|------------|------------|------------|------------|
|              | .... ....  | .... ....  | .... ....  | .... ....  | .... ....  | .... ....  |
|              | 6005       | 6015       | 6025       | 6035       | 6045       | 6055       |
| 2a_SalI      | CTTAATAATA | AGGAAATAAA | TGAATTCAAA | GGAAGACTGA | ACAATGTGAA | GAGTAAACAA |
| 2a_Thai      | CTTAATAATA | AGGAAATAAA | TGAATTCAAA | GGAAGACTGA | ACAATGTGAA | GAGTAAACAA |
| Conservation | *****      | *****      | *****      | *****      | *****      | *****      |
|              |            |            |            |            |            |            |
|              | .... ....  | .... ....  | .... ....  | .... ....  | .... ....  | .... ....  |
|              | 6065       | 6075       | 6085       | 6095       | 6105       | 6115       |
| 2a_SalI      | ACAGCCATTT | CAAACAAAAT | TGATAACGCT | ACTACGCTGC | TGCACAATTT | GAACAAAATT |
| 2a_Thai      | ACAGCCATTT | CAAACAAAAT | TGATAACGCT | ACTACGCTGC | TGCACAATTT | GAACAAAATT |
| Conservation | *****      | *****      | *****      | *****      | *****      | *****      |
|              |            |            |            |            |            |            |
|              | .... ....  | .... ....  | .... ....  | .... ....  | .... ....  | .... ....  |
|              | 6125       | 6135       | 6145       | 6155       | 6165       | 6175       |
| 2a_SalI      | AAAACGGATG | ATAAGAATTA | CGACACAATT | TTAGAAAAAG | ACGCTTCTGA | AGAATTGAAG |
| 2a_Thai      | AAAACGGATG | ATAAGAATTA | CGACACAATT | TTAGAAAAAG | ACGCTTCTGA | AGAATTGAAG |
| Conservation | *****      | *****      | *****      | *****      | *****      | *****      |
|              |            |            |            |            |            |            |
|              | .... ....  | .... ....  | .... ....  | .... ....  | .... ....  | .... ....  |
|              | 6185       | 6195       | 6205       | 6215       | 6225       | 6235       |
| 2a_SalI      | AGGCGACGTG | ATTCATTTAA | TCAAGAAATG | AAAAACACCG | TCGATGGCTT | AAAATTGAAG |
| 2a_Thai      | AGGCGACGTG | ATTCATTTAA | TCAAGAAATA | AAAAACACCG | TCGATGGCTT | AAAATTGAAG |
| Conservation | *****      | *****      | *****      | *****      | *****      | *****      |
|              |            |            |            |            |            |            |
|              | .... ....  | .... ....  | .... ....  | .... ....  | .... ....  | .... ....  |
|              | 6245       | 6255       | 6265       | 6275       | 6285       | 6295       |
| 2a_SalI      | GAAATCCAAG | AAAAGTTTAA | TGAGCAAGTA | AAACTCCTAC | AAAATTTAGA | AACAAAAGTG |
| 2a_Thai      | GAAATCCAAG | AAAAGTTTAA | TGAGCAAGTA | AAACTCCTAC | AAAATTTAGA | AACAAAAGTG |
| Conservation | *****      | *****      | *****      | *****      | *****      | *****      |
|              |            |            |            |            |            |            |
|              | .... ....  | .... ....  | .... ....  | .... ....  | .... ....  | .... ....  |
|              | 6305       | 6315       | 6325       | 6335       | 6345       | 6355       |
| 2a_SalI      | AGCACACTAA | ATGTGCATGA | GGGAAACGCT | ACCGAAACTG | TGAAAAAAGA | AAACTGACC  |
| 2a_Thai      | AGCACACTAA | ATGTGCATGA | GGGAAACGCT | ACCGAAACTG | TGAAAAAAGA | AAACTGACC  |
| Conservation | *****      | *****      | *****      | *****      | *****      | *****      |
|              |            |            |            |            |            |            |
|              | .... ....  | .... ....  | .... ....  | .... ....  | .... ....  | .... ....  |
|              | 6365       | 6375       | 6385       | 6395       | 6405       | 6415       |
| 2a_SalI      | GTTGATGCAA | TTCAAGCCGC | AATGGAAGGC | ATAGAAAAAG | ATGTCGAATA | TATCAACTAC |
| 2a_Thai      | GTTGATGCAA | TTCAAGCCGC | AATGGAAGGC | ATAGAAAAAG | ATGTCGAATA | TATCAACTAC |
| Conservation | *****      | *****      | *****      | *****      | *****      | *****      |
|              |            |            |            |            |            |            |
|              | .... ....  | .... ....  | .... ....  | .... ....  | .... ....  | .... ....  |
|              | 6425       | 6435       | 6445       | 6455       | 6465       | 6475       |
| 2a_SalI      | TCATATGATG | AACTATTAAA | GAAAGGACAA | AAAATTGAAA | ATCAGAGATA | CACATCCATA |
| 2a_Thai      | TCATATGATG | AACTATTAAA | GAAAGGACAA | AAAATTGAAA | ATCAGAGATA | CACATCCATA |
| Conservation | *****      | *****      | *****      | *****      | *****      | *****      |
|              |            |            |            |            |            |            |
|              | .... ....  | .... ....  | .... ....  | .... ....  | .... ....  | .... ....  |
|              | 6485       | 6495       | 6505       | 6515       | 6525       | 6535       |
| 2a_SalI      | AGGGAAAACC | TCACCAATAA | AATAGCGAAT | GACTCCTCAG | CAATCAACAA | AATAAAGAAA |
| 2a_Thai      | AGGGAAAACC | TCACCAATAA | AATAGCGAAT | GACTCCTCAG | CAATCAACAA | AATAAAGAAA |
| Conservation | *****      | *****      | *****      | *****      | *****      | *****      |
|              |            |            |            |            |            |            |
|              | .... ....  | .... ....  | .... ....  | .... ....  | .... ....  | .... ....  |
|              | 6545       | 6555       | 6565       | 6575       | 6585       | 6595       |
| 2a_SalI      | AAAGCTCAAC | AGTATTTAGC | ATACATTAAG | AATAACTACA | ACTCTATTTA | TAATGATACT |
| 2a_Thai      | AAAGCTCAAG | AGTATTTAGC | ATACATTAAG | AATAACTACA | ACTCTATTTA | TAATGATACT |
| Conservation | *****      | *****      | *****      | *****      | *****      | *****      |

|              |            |             |             |            |            |            |
|--------------|------------|-------------|-------------|------------|------------|------------|
|              | .... ....  | .... ....   | .... ....   | .... ....  | .... ....  | .... ....  |
|              | 6605       | 6615        | 6625        | 6635       | 6645       | 6655       |
| 2a_SalI      | GGCACTTTAA | ATGAATACTT  | CGACACCAAA  | CGGTTAAGTA | ACCACGATTT | AACAAATGTT |
| 2a_Thai      | GGCACTTTAA | ATGAATACTT  | CGACACCAAA  | CGGTTAAGTA | ACCACGATTT | AACAAATGTT |
| Conservation | *****      | *****       | *****       | *****      | *****      | *****      |
|              | .... ....  | .... ....   | .... ....   | .... ....  | .... ....  | .... ....  |
|              | 6665       | 6675        | 6685        | 6695       | 6705       | 6715       |
| 2a_SalI      | CAGGAAGCGA | CCAGATTACA  | CATTGAAATG  | TCCGCAGCCG | TTGAAGCATC | AGAAGAGATA |
| 2a_Thai      | CAGGAAGCGA | CCAGATTACA  | CATTGAAATG  | TCCGCAGCCG | TTGAAGCATC | AGAAGAGATA |
| Conservation | *****      | *****       | *****       | *****      | *****      | *****      |
|              | .... ....  | .... ....   | .... ....   | .... ....  | .... ....  | .... ....  |
|              | 6725       | 6735        | 6745        | 6755       | 6765       | 6775       |
| 2a_SalI      | ATTGCAGATA | TGAAAAATGA  | ATTTCATAACG | AACACAGAAG | CGGATATAAG | CGCTTTACAA |
| 2a_Thai      | ATTGCAGATA | TGAAAAATGA  | ATTTCATAACG | AACACAGAAG | CGGATATAAG | CGCTTTACAA |
| Conservation | *****      | *****       | *****       | *****      | *****      | *****      |
|              | .... ....  | .... ....   | .... ....   | .... ....  | .... ....  | .... ....  |
|              | 6785       | 6795        | 6805        | 6815       | 6825       | 6835       |
| 2a_SalI      | AATAGCGCAG | ACAGATTAAA  | GTCGCTTTAT  | AGTAATCTAA | AACGCAAACA | AATTAGTATA |
| 2a_Thai      | AATAGCGCAG | ACAGATTAAAN | GTCGCTTTAT  | AGTAATCTAA | AACGCAAACA | AATTAGTATA |
| Conservation | *****      | *****       | *****       | *****      | *****      | *****      |
|              | .... ....  | .... ....   | .... ....   | .... ....  | .... ....  | .... ....  |
|              | 6845       | 6855        | 6865        | 6875       | 6885       | 6895       |
| 2a_SalI      | AACCAAATTT | ACAAAAAGAT  | TAACTTAATT  | AAGTTGCAAG | AAATTAAAAC | AAGCGCTAAC |
| 2a_Thai      | AACCAAATTT | ACAAAAAGAT  | TAACTTAATT  | AAGTTGCAAG | AAATTAAAAC | AAGCGCTAAC |
| Conservation | *****      | *****       | *****       | *****      | *****      | *****      |
|              | .... ....  | .... ....   | .... ....   | .... ....  | .... ....  | .... ....  |
|              | 6905       | 6915        | 6925        | 6935       | 6945       | 6955       |
| 2a_SalI      | AAATATATGG | ACATAGCCAA  | ACTGTTTAAAC | AATGTGCTAG | AGGCCCAACA | TAAAGAATTG |
| 2a_Thai      | AAATATATGG | ACATAGCCAA  | ACTGTTTAAAC | AATGTGCTAG | AGGCCCAACA | TAAAGAATTG |
| Conservation | *****      | *****       | *****       | *****      | *****      | *****      |
|              | .... ....  | .... ....   | .... ....   | .... ....  | .... ....  | .... ....  |
|              | 6965       | 6975        | 6985        | 6995       | 7005       | 7015       |
| 2a_SalI      | GCACAAGATA | GAAGTAAAAT  | ATTGCAAGCT  | AAGGAAAAC  | CCATTAATAT | GCAGCAACTG |
| 2a_Thai      | GCACAAGATA | TAAGTAAAAT  | ATTGCAAGCT  | AAGGAAAAC  | CCATTAATAT | GCAGCAACTG |
| Conservation | *****      | *****       | *****       | *****      | *****      | *****      |
|              | .... ....  | .... ....   | .... ....   | .... ....  | .... ....  | .... ....  |
|              | 7025       | 7035        | 7045        | 7055       | 7065       | 7075       |
| 2a_SalI      | TTAGAATCTC | ACATTGATAA  | ACTTCGAGCC  | TTGATAACCA | ATATTGATAA | AGAACTGATA |
| 2a_Thai      | TTAGAATCTC | ACATTGATAA  | ACTTCGAGCC  | TTGATAACCA | ATATTGATAA | AGAACTGATA |
| Conservation | *****      | *****       | *****       | *****      | *****      | *****      |
|              | .... ....  | .... ....   | .... ....   | .... ....  | .... ....  | .... ....  |
|              | 7085       | 7095        | 7105        | 7115       | 7125       | 7135       |
| 2a_SalI      | GAATTAACAA | ATGGTAAAAT  | TAAAGAATCA  | AATCGACGTA | TTAGTCAAAT | TTCCCAATG  |
| 2a_Thai      | GAATTAACAA | ATGGTAAAAT  | TAAAGCATCA  | AATCGACGTA | TTAGTCAAAT | TTCCCAATG  |
| Conservation | *****      | *****       | *****       | *****      | *****      | *****      |
|              | .... ....  | .... ....   | .... ....   | .... ....  | .... ....  | .... ....  |
|              | 7145       | 7155        | 7165        | 7175       | 7185       | 7195       |
| 2a_SalI      | GGGCAAGGCA | AATTGTTTCAG | CACCCAGAA   | GGACAAGCTT | ATAATAATTT | ACACAACACA |
| 2a_Thai      | GGGCAAGGCA | AATTGTTTCAG | CACCCAGAA   | GGACAAGCTT | ATAATAATTT | ACACAACACA |
| Conservation | *****      | *****       | *****       | *****      | *****      | *****      |

```

      ....|....| ....|....| ....|....| ....|....| ....|....|
      7205      7215      7225      7235      7245      7255
2a_SalI  GGATATAACC ATTATGGAAG TGGAAACCAT TCAAGAGGAA GAAATGAAAA TGGAAATGTC
2a_Thai  GGATATAACC ATTATGGAAG TGGAAACCAT TCAAGAGGAA GAAATGAAAA TGGAAATGTC
Conservation *****

```

```

      ....|....| ....|....| ....|....| ....|....| ....|....|
      7265      7275      7285      7295      7305      7315
2a_SalI  CGTTTTGCAG CAGGGATTGT TGTGGGATTT GGTGTTTGT CTTTTTTGC TTCGGCATTG
2a_Thai  CGTTTTGCAG CAGGGATTGT TGTGGGATTT GGTGTTTGT CTTTTTTGC TTCGGCATTG
Conservation *****

```

```

      ....|....| ....|....| ....|....| ....|....| ....|....|
      7325      7335      7345      7355      7365      7375
2a_SalI  TTTAAAGGCA AAGGGGAAAA CGAAACATAT GGAAGAGATC TAAATTCACG TGATGAAGAA
2a_Thai  TTTAAAGGCA AAGGGGAAAA CGAAACATAT GGAAGAGATC TAAATTCACG TGATGAAGAA
Conservation *****

```

```

      ....|....| ....|....| ....|....| ....|....| ....|....|
      7385      7395      7405      7415      7425      7435
2a_SalI  TTTGAAGGCA AAAACAATGG AAATCTCAA GATAAGGAAG AAATTATTGA AGTGCCTTT
2a_Thai  TTTGAAGCCA AAAACAATGG AAATCTCAA GATAAGGAAG AAATTATTGA AGTGCCTTT
Conservation ***** *

```

```

      ....|....| ....|....| ....
      7445      7455
2a_SalI  CACGAAAGTG AAAATGTGTA TTAA
2a_Thai  CACGAAAGTG AAAATGCGTA TTAA
Conservation ***** *

```

**Alignment: Pvrpb2b**

```

      ....|....| ....|....| ....|....| ....|....| ....|....|
      5      15      25      35      45      55
2b_SalI  ATGGAATAA ACGCGCTTG GACGATTTG TGCAATCTC TATTGGTCCT TTTAGCGTCA
2b_Thai  ATGGAATAA ACGCGCTTG GACGATTTG TGCAATCTC TATTGGTCCT TTTAGCGTCA
Conservation *****
      ....|....| ....|....| ....|....| ....|....| ....|....|
      65      75      85      95     105     115
2b_SalI  AGTAGAGATG TCAACAGGAG TAAACCGAAC AGATTTAAAA AGGAACTCAC GTTATCACCC
2b_Thai  AGTAGAGATG TCAACAGGAG TAAACCGAAC AGATTTAAAA AGGAACTCAC GTTATCACCC
Conservation *****
      ....|....| ....|....| ....|....| ....|....| ....|....|
      125     135     145     155     165     175
2b_SalI  ATATATCAA ATTTAATTCG AAGCAGTCAA GTACAACATG ATAAAACTA TGAAGTTGAT
2b_Thai  ATATATCAA ATTTAATTCG AAGCAGTCAA GTACAACATG ATAAAACTA TGAAGTTGAT
Conservation *****
      ....|....| ....|....| ....|....| ....|....| ....|....|
      185     195     205     215     225     235
2b_SalI  GATGGCAAAA TTAACGATGG AGGTGACGAA AAAGCGCATT CCCCTGATAG CTCATTCTCG
2b_Thai  GATGGCAAAA TTAACGATGG AGGTGACGAA AAAGCGCATT CCCCTGATAG CTCATTCTCG
Conservation *****
      ....|....| ....|....| ....|....| ....|....| ....|....|
      245     255     265     275     285     295
2b_SalI  GGGGATTGAG AAAGGTATAG CGCTAAAGGA AAACCATCGT ACTATTCTTA CATAAAAAGA
2b_Thai  GGGGATTGAG AAAGGTATAG CGCTAAAGGA AAACCATCGT ACTATTCTTA CATAAAAAGA
Conservation *****
      ....|....| ....|....| ....|....| ....|....| ....|....|
      305     315     325     335     345     355
2b_SalI  GGGGACATAT ATACACACAG TTCAAACACA AATAAAAGCT TAAATGATAG TAACAAGTTG
2b_Thai  GGGGACATAT ATACACACAG TTCAAACACA AATAAAAGCT TAAATGATAG TAACAAGTTG
Conservation *****
      ....|....| ....|....| ....|....| ....|....| ....|....|
      365     375     385     395     405     415
2b_SalI  AATAGGAATA CGATTCCAAA CGAATTTATT CAAACTAGTA ATAAGGAAAA ACCTGAGAAG
2b_Thai  AATAGGAATA CGATTCCAAA CGAATTTATT CAAACTAGTA ATAAGGAAAA ACCTGAGAAG
Conservation *****
      ....|....| ....|....| ....|....| ....|....| ....|....|
      425     435     445     455     465     475
2b_SalI  AAAACTACCA AAAGTGAACC AGCTCCAAAA AACGGTCAAA CGTCTCCTTC ACCAAAAGAG
2b_Thai  AAAACTACCA AAAGTGAACC AGCTCCAAAA AACGGTCAAA CGTCTCCTTC ACCAAAAGAG
Conservation *****
      ....|....| ....|....| ....|....| ....|....| ....|....|
      485     495     505     515     525     535
2b_SalI  CCTTCCCCCG AATCTACACA AATTACCAAT ACAACTGATA ACATAGACTA CTTCGACATT
2b_Thai  CCTTCCCCCG AATCTACACA AATTACCAAT ACAACTGATA ACATAGACTA CTTCGACATT
Conservation *****
      ....|....| ....|....| ....|....| ....|....| ....|....|
      545     555     565     575     585     595
2b_SalI  TCAGATGAGA GCAATTACTA TTTAATTTCC CAGTTAAGAC CACATTTTTC TAATATATAC
2b_Thai  TCAGATGAGA GCAATTACTA TTTAATTTCC CAGTTAAGAC CACATTTTTC TAATATATAC
Conservation *****

```

|              |            |            |            |            |            |            |
|--------------|------------|------------|------------|------------|------------|------------|
|              | .... ....  | .... ....  | .... ....  | .... ....  | .... ....  | .... ....  |
|              | 605        | 615        | 625        | 635        | 645        | 655        |
| 2b_SalI      | TTTTTCGATG | AATTTAAACG | TTACGCATCA | TATCACACAG | AAATCAAACG | TTATGAGGAC |
| 2b_Thai      | TTTTTCGATG | AATTTAAACG | TTACGCATCA | TATCACACAG | AAATCAAACG | TTATGAGGAC |
| Conservation | *****      | *****      | *****      | *****      | *****      | *****      |
|              | .... ....  | .... ....  | .... ....  | .... ....  | .... ....  | .... ....  |
|              | 665        | 675        | 685        | 695        | 705        | 715        |
| 2b_SalI      | ATACATAAGA | CAAAGTTAA  | TTCCCTTTG  | AACGAAGCAT | CCAGAGCAAT | CGGCATTTGT |
| 2b_Thai      | ATACATAAGA | AAAAAGTTAA | TTCCCTTTG  | AACGAAGCAT | CCAGAGCAAT | CGGCATTTGT |
| Conservation | *****      | *****      | *****      | *****      | *****      | *****      |
|              | .... ....  | .... ....  | .... ....  | .... ....  | .... ....  | .... ....  |
|              | 725        | 735        | 745        | 755        | 765        | 775        |
| 2b_SalI      | AACAGGGCAA | AAAATACAGT | GAAGGGGTTA | ATAAATATTT | TAGAGAATCC | CCAAAAGTTT |
| 2b_Thai      | AACAGGGCAA | AAAATACAGT | GAAGGGGTTA | ATAAATATTT | TAGAGAATCC | CCAAAAGTTT |
| Conservation | *****      | *****      | *****      | *****      | *****      | *****      |
|              | .... ....  | .... ....  | .... ....  | .... ....  | .... ....  | .... ....  |
|              | 785        | 795        | 805        | 815        | 825        | 835        |
| 2b_SalI      | AAAACGCAAA | GAGAATCATA | TGATGTAAAA | CTTCGCCAAT | ATGAAGAAAA | AAAGGAAGCA |
| 2b_Thai      | AAAACGCAAA | GAGAATCATA | TGATGTAAAA | CTTCGCCAAT | ATGAAGAAAA | AAAGGAAGCA |
| Conservation | *****      | *****      | *****      | *****      | *****      | *****      |
|              | .... ....  | .... ....  | .... ....  | .... ....  | .... ....  | .... ....  |
|              | 845        | 855        | 865        | 875        | 885        | 895        |
| 2b_SalI      | TTTAGGGGAT | GCTTACTAAA | TAAAAATCGG | AAGAATTTGG | ATCAAATAAA | AAAAATAAAT |
| 2b_Thai      | TTTAGGGGAT | GCTTACTAAA | TAAAAATCGG | AAGAATTTGG | ATCAAATAAA | AAAAATAAAT |
| Conservation | *****      | *****      | *****      | *****      | *****      | *****      |
|              | .... ....  | .... ....  | .... ....  | .... ....  | .... ....  | .... ....  |
|              | 905        | 915        | 925        | 935        | 945        | 955        |
| 2b_SalI      | AACGAAATTC | GTGATCTGCT | AGAAAACTG  | AAATGCTCAC | AGGACTGTCA | AACTAATGTA |
| 2b_Thai      | AACGAAATTC | GTGATCTGCT | AGAACACTG  | AAATGCTCAC | AGTACTGTCA | AACTAATGTA |
| Conservation | *****      | *****      | ****       | *****      | **         | *****      |
|              | .... ....  | .... ....  | .... ....  | .... ....  | .... ....  | .... ....  |
|              | 965        | 975        | 985        | 995        | 1005       | 1015       |
| 2b_SalI      | TATTTTGACA | TGATTTAAAT | ATACTTGGTA | GATTTTAAAA | AAATGCCTTA | CGAAAATTAT |
| 2b_Thai      | TATTTTGACA | TGATTTAAAT | ATACTTGGTA | GATTTTAAAA | AAATGCCTTA | CGAAAATTAT |
| Conservation | *****      | *****      | *****      | *****      | *****      | *****      |
|              | .... ....  | .... ....  | .... ....  | .... ....  | .... ....  | .... ....  |
|              | 1025       | 1035       | 1045       | 1055       | 1065       | 1075       |
| 2b_SalI      | GACACTTTTA | TAAAACAGTA | TAAAAATTCT | TACCTTTCTG | GTGTTGATAT | GATAAGGAAA |
| 2b_Thai      | GACACTTTTA | TAAAACAGTA | TAAAAATTCT | TACCTTTCTG | GTGTTGATAT | GATAAGGAAA |
| Conservation | *****      | *****      | *****      | *****      | *****      | *****      |
|              | .... ....  | .... ....  | .... ....  | .... ....  | .... ....  | .... ....  |
|              | 1085       | 1095       | 1105       | 1115       | 1125       | 1135       |
| 2b_SalI      | ATTGAAAAAC | AAATAGACAA | CCCAGTTACC | ATAAATGCGA | TAAAATTCAC | TCAAAGGAG  |
| 2b_Thai      | ATTGAAAAAC | AAATAGACAA | CCCAGTTACC | ATAAATGCGA | TAAAATTCAC | TCAAAGGAG  |
| Conservation | *****      | *****      | *****      | *****      | *****      | *****      |
|              | .... ....  | .... ....  | .... ....  | .... ....  | .... ....  | .... ....  |
|              | 1145       | 1155       | 1165       | 1175       | 1185       | 1195       |
| 2b_SalI      | ATGGGATACA | TTATAGACAG | ATTTGAATAT | CACCTGCAAA | AAGTGAAACA | TTCATTGAT  |
| 2b_Thai      | ATGGGATACA | TTATAGACAG | ATTTGAATAT | CACCTGCAAA | AAGTGAAACA | TTCATTGAT  |
| Conservation | *****      | *****      | *****      | *****      | *****      | *****      |

|              |            |            |            |            |            |            |
|--------------|------------|------------|------------|------------|------------|------------|
|              | .... ....  | .... ....  | .... ....  | .... ....  | .... ....  | .... ....  |
|              | 1205       | 1215       | 1225       | 1235       | 1245       | 1255       |
| 2b_SalI      | CAAGTGACAG | CATTGTCCGA | CGGGGTAAA  | CCAAAACAGG | TCACTAAAA  | TCGTCTAAA  |
| 2b_Thai      | CAAGTGACAG | CATTGTCCGA | CGGGGTAAA  | CCAAAACAGG | TCACTAAAA  | TCGTCTAAA  |
| Conservation | *****      | *****      | *****      | *****      | *****      | *****      |
|              | .... ....  | .... ....  | .... ....  | .... ....  | .... ....  | .... ....  |
|              | 1265       | 1275       | 1285       | 1295       | 1305       | 1315       |
| 2b_SalI      | GAGTACTACT | TTAATATAGG | TAACTACTAC | TCCATTTTTA | AATTCGGCAA | AGATAGTCTC |
| 2b_Thai      | GAGTACTACT | TTAATATAGG | TAACTACTAC | TCCATTTTTA | AATTCGGCAA | AGATAGTCTC |
| Conservation | *****      | *****      | *****      | *****      | *****      | *****      |
|              | .... ....  | .... ....  | .... ....  | .... ....  | .... ....  | .... ....  |
|              | 1325       | 1335       | 1345       | 1355       | 1365       | 1375       |
| 2b_SalI      | AATATGTTGA | ATAAAGCATT | AATACATAAA | GAAAAAATAG | TCCACAACCT | ACTTGGTGAA |
| 2b_Thai      | AATATGTTGA | ATAAAGCATT | AATACATAAA | GAAAAAATAG | TCCACAACCT | ACTTGGTGAA |
| Conservation | *****      | *****      | *****      | *****      | *****      | *****      |
|              | .... ....  | .... ....  | .... ....  | .... ....  | .... ....  | .... ....  |
|              | 1385       | 1395       | 1405       | 1415       | 1425       | 1435       |
| 2b_SalI      | TTATTTGGCC | ATTTAGAAGA | GAGAATATCT | AACTTATAG  | ATTCAGAGTA | CTTCATAACA |
| 2b_Thai      | TTATTTGGCC | ATTTAGAAGA | GAGAATATCT | AACTTATAG  | ATTCAGAGTA | CTTCATAACA |
| Conservation | *****      | *****      | *****      | *****      | *****      | *****      |
|              | .... ....  | .... ....  | .... ....  | .... ....  | .... ....  | .... ....  |
|              | 1445       | 1455       | 1465       | 1475       | 1485       | 1495       |
| 2b_SalI      | GAAAGTAATA | ACATCATTTT | ACAATCCGAA | GAAACTTTAA | AACTTGCGGA | AGACGTATAT |
| 2b_Thai      | GAAAGTAATA | ACATCATTTT | ACAATCCGAA | GAAACTTTAA | AACTTGCGAA | AGACGTATAT |
| Conservation | *****      | *****      | *****      | *****      | *****      | *****      |
|              | .... ....  | .... ....  | .... ....  | .... ....  | .... ....  | .... ....  |
|              | 1505       | 1515       | 1525       | 1535       | 1545       | 1555       |
| 2b_SalI      | GATAAAAACA | CCAAACTGAT | AGAGGACCTT | ACACTGTATC | CACACTTAGA | AATTAACGAA |
| 2b_Thai      | GATAAAAACA | CCAAACTGAT | AGAGGACCTT | ACACTGTATC | CACACTTAGA | AATTAACGAA |
| Conservation | *****      | *****      | *****      | *****      | *****      | *****      |
|              | .... ....  | .... ....  | .... ....  | .... ....  | .... ....  | .... ....  |
|              | 1565       | 1575       | 1585       | 1595       | 1605       | 1615       |
| 2b_SalI      | TTCAAAAAG  | ACTACGACAA | CAATGTGGAA | GATTTGAGAG | AATCTATCAT | CTACATACAA |
| 2b_Thai      | TTCAAAAAG  | ACTACGACAA | CAATGTGGAA | GATTTGAGAG | AATCTATCAT | CTACATACAA |
| Conservation | *****      | *****      | *****      | *****      | *****      | *****      |
|              | .... ....  | .... ....  | .... ....  | .... ....  | .... ....  | .... ....  |
|              | 1625       | 1635       | 1645       | 1655       | 1665       | 1675       |
| 2b_SalI      | TCATACGTCT | CATCTATTAA | AAGTGCCTAT | AGATATAATG | TGTTAGAAAA | GGACTCTGTA |
| 2b_Thai      | TCATACGTCT | CATCTATTAA | AAGTGCCTAT | AGATATAATG | TGTTAGAAAA | GGACTCTGTA |
| Conservation | *****      | *****      | *****      | *****      | *****      | *****      |
|              | .... ....  | .... ....  | .... ....  | .... ....  | .... ....  | .... ....  |
|              | 1685       | 1695       | 1705       | 1715       | 1725       | 1735       |
| 2b_SalI      | GAAAGTAAAC | AAAAGAACAT | ACCAGCTAAC | AGTAATGCC  | AGAAGAAAGT | CGATGAGCTG |
| 2b_Thai      | GAAAGTAAAC | GAAAGAACAT | ACCAGCTAAC | AGTAATGCC  | AGGAGAAAGT | CGATGAGCTG |
| Conservation | *****      | *****      | *****      | *****      | *****      | *****      |
|              | .... ....  | .... ....  | .... ....  | .... ....  | .... ....  | .... ....  |
|              | 1745       | 1755       | 1765       | 1775       | 1785       | 1795       |
| 2b_SalI      | TTGAGCATA  | TAGATAGCAT | AAGTTATAGC | AATTTTCCG  | TAGCCGAGAA | TTTTCAAAAA |
| 2b_Thai      | TTGAGCATA  | TAGATAGCAT | AAGTTATAGC | AATTTTCCG  | TAGCCGAGAA | TTTTCAAAAA |
| Conservation | *****      | *****      | *****      | *****      | *****      | *****      |

```

      ....|....| ....|....| ....|....| ....|....| ....|....| ....|....|
      1805      1815      1825      1835      1845      1855
2b_SalI  ATGAAAGATT ACTATAAAGA AATCGAAAAA TTAAAAATCA AAATACTGCA ATTAATAGAA
2b_Thai  ATGAAAGATT ACTATAAAGA AATCGAAAAA TTAAAAATCA AAATACTGCA ATTAATAGAA
Conservation *****
      ....|....| ....|....| ....|....| ....|....| ....|....| ....|....|
      1865      1875      1885      1895      1905      1915
2b_SalI  GCCATTAAAA AATACCAACA ACATGTGGAA GAATTAATCA ACAAGGAAAA AGCAGTTGCG
2b_Thai  GCCATTAAAA AATACCAACA ACATGTGGAA GAATTAATCA ACAAGGAAAA AGCAGTTGCG
Conservation *****
      ....|....| ....|....| ....|....| ....|....| ....|....| ....|....|
      1925      1935      1945      1955      1965      1975
2b_SalI  ATTCTCAAAG AAGATATAAA TAAAAATAA GAATATATAA AAGGAATAAT AGAAAAATTG
2b_Thai  ATTCTCAAAG AAGATATAAA TAAAAATAA GAATATATAA AAGGAATAAT AGAAAAATTG
Conservation *****
      ....|....| ....|....| ....|....| ....|....| ....|....| ....|....|
      1985      1995      2005      2015      2025      2035
2b_SalI  AAACAACATA TTTCTGCGAA TAAAGATTTT GATAAAATTT TCCAGCAAGT TGAACAATTA
2b_Thai  AAACAACATA TTTCTGCGAA TAAAGATTTT GATAAAATTT TCCAGCAAGT TGAACAATTA
Conservation *****
      ....|....| ....|....| ....|....| ....|....| ....|....| ....|....|
      2045      2055      2065      2075      2085      2095
2b_SalI  ATTAACGAAG CGCTTTTTAA CAAAGACCAA TTTGAACATA ATAAAAATGA CTTACACACC
2b_Thai  ATTAACGAAG CGCTTTTTAA CAAAGACCAA TTTGAACATA ATAAAAATGA CTTACACACC
Conservation *****
      ....|....| ....|....| ....|....| ....|....| ....|....| ....|....|
      2105      2115      2125      2135      2145      2155
2b_SalI  AAAATGAAAG AAATAATGCA TACATTTTAC GAGCGTGATT TACAACAATT TTTGGACAAT
2b_Thai  AAAATGAAAG AAATAATGCA TACATTTTAC GAGCGTGATT TACAACAATT TTTGGACAAT
Conservation *****
      ....|....| ....|....| ....|....| ....|....| ....|....| ....|....|
      2165      2175      2185      2195      2205      2215
2b_SalI  ATGTGCAAAAT TTTTAAAGGA CCAAGAAGCT TCCTACCAA ATGCAGACAG TAAGGAAAAG
2b_Thai  ATGTGCAAAAT TTTTAAAGGA CCAAGAAGCT TCCTACCAA ATGCAGACAG TAAGGAAAAG
Conservation *****
      ....|....| ....|....| ....|....| ....|....| ....|....| ....|....|
      2225      2235      2245      2255      2265      2275
2b_SalI  CTTGACCAAC TGCTAACCAAC AGTAAAGGCA AAACAAGATG AACTTAAAGA GATGAAATGC
2b_Thai  CTTGACCAAC TGCTAACCAAC AGTAAAGGCA AAACAAGATG AACTTAAAGA GATGAAATGC
Conservation *****
      ....|....| ....|....| ....|....| ....|....| ....|....| ....|....|
      2285      2295      2305      2315      2325      2335
2b_SalI  GATGACATTC CAGACATAAT CGACAATTTG AAAAAAGAAT CGCAAATGT TTTAAATCTA
2b_Thai  GATGACATTC CAGACATAAT CGACAATTTG AAAAAAGAAT CGCAAATGT TTTAAATCTA
Conservation *****
      ....|....| ....|....| ....|....| ....|....| ....|....| ....|....|
      2345      2355      2365      2375      2385      2395
2b_SalI  AAAGATGAGG TCATAAATAA ACAGTTTGAA AATATGCGCA CAGAAATGTC AAGTTCATTG
2b_Thai  AAAGATGAGG TCATAAATAA ACAGTTTGAA AATATGCGCA CAGAAATGTC AAGTTCATTG
Conservation *****

```

|              |            |            |            |             |            |             |
|--------------|------------|------------|------------|-------------|------------|-------------|
|              | .... ....  | .... ....  | .... ....  | .... ....   | .... ....  | .... ....   |
|              | 2405       | 2415       | 2425       | 2435        | 2445       | 2455        |
| 2b_SalI      | GATCAAATGA | CCAAAGAGTA | TAACGCTCTC | AAAAGCAGCA  | TAGAGGAATA | CGAAGCGGAA  |
| 2b_Thai      | GATCAAATGA | CCAAAGAGTA | TAACGCTCTC | AAAAGCAGCA  | TAGAGGAATA | CGAAGCGGAA  |
| Conservation | *****      | *****      | *****      | *****       | *****      | *****       |
|              |            |            |            |             |            |             |
|              | .... ....  | .... ....  | .... ....  | .... ....   | .... ....  | .... ....   |
|              | 2465       | 2475       | 2485       | 2495        | 2505       | 2515        |
| 2b_SalI      | AAAAAAGGAA | TAGAAAACCA | TAAACAAAAT | ATAATTAAAA  | GAAAAAATAC | ATTTCATCGTT |
| 2b_Thai      | AAAAAAGGAA | TAGAAAACCA | TAAACAAAAT | ATAATTAAAA  | GAAAAAATAC | ATTTCATCGTT |
| Conservation | *****      | *****      | *****      | *****       | *****      | *****       |
|              |            |            |            |             |            |             |
|              | .... ....  | .... ....  | .... ....  | .... ....   | .... ....  | .... ....   |
|              | 2525       | 2535       | 2545       | 2555        | 2565       | 2575        |
| 2b_SalI      | GCTGAACATG | AAAATGATGA | AGATGTGCCG | GAAGGGAAAA  | ATACCTACAA | CGAGTTTATA  |
| 2b_Thai      | GCTGAACATG | AAAATGATGA | AGATGTGCCG | GAAGGGAAAA  | ATACCTACAA | CGAGTTTATA  |
| Conservation | *****      | *****      | *****      | *****       | *****      | *****       |
|              |            |            |            |             |            |             |
|              | .... ....  | .... ....  | .... ....  | .... ....   | .... ....  | .... ....   |
|              | 2585       | 2595       | 2605       | 2615        | 2625       | 2635        |
| 2b_SalI      | AGCAATAAGG | ACACAATTTT | GCAAAAAGAA | AGCGCAATTA  | GCAACCAGAT | GAACACATTA  |
| 2b_Thai      | AGCAATAAGG | ACACAATTTT | GCAAAAAGAA | AGCGCAATTA  | GCAACCAGAT | GAACACATTA  |
| Conservation | *****      | *****      | *****      | *****       | *****      | *****       |
|              |            |            |            |             |            |             |
|              | .... ....  | .... ....  | .... ....  | .... ....   | .... ....  | .... ....   |
|              | 2645       | 2655       | 2665       | 2675        | 2685       | 2695        |
| 2b_SalI      | GAGGAAAAAA | AAAGAAATAG | AAAAACTACG | TTACAAACAT  | ATGGTGACGC | AATACAAAAA  |
| 2b_Thai      | GAGGAAAAAA | AAAGAAATAG | AAAAACTACG | TTACAAACAT  | ATGGTGACGC | AATACAAAAA  |
| Conservation | *****      | *****      | *****      | *****       | *****      | *****       |
|              |            |            |            |             |            |             |
|              | .... ....  | .... ....  | .... ....  | .... ....   | .... ....  | .... ....   |
|              | 2705       | 2715       | 2725       | 2735        | 2745       | 2755        |
| 2b_SalI      | TTAGAAACGT | ACACTGAAAA | GAAGGATGAA | GAAACTAAAG  | TGCTGCTAGA | CAAGTTTAAC  |
| 2b_Thai      | TTAGAAACGT | ACACTGAAAA | GAAGGATGAA | GAAACTAAAG  | TGCTGCTAGA | AAAGTTTAAC  |
| Conservation | *****      | *****      | *****      | *****       | *****      | *****       |
|              |            |            |            |             |            |             |
|              | .... ....  | .... ....  | .... ....  | .... ....   | .... ....  | .... ....   |
|              | 2765       | 2775       | 2785       | 2795        | 2805       | 2815        |
| 2b_SalI      | ACCGAAGTGG | AAAACCTCAA | ACTAGATGAA | GATGAAAAAT  | CATTTAACGA | TGCCAAAAGT  |
| 2b_Thai      | ACCGAAGTGG | AAAACCTCAA | ACTAGATGAA | GATGAAAAAT  | CATTTAACGA | TGCCAAAAGT  |
| Conservation | *****      | *****      | *****      | *****       | *****      | *****       |
|              |            |            |            |             |            |             |
|              | .... ....  | .... ....  | .... ....  | .... ....   | .... ....  | .... ....   |
|              | 2825       | 2835       | 2845       | 2855        | 2865       | 2875        |
| 2b_SalI      | ATTGTCAGTA | ACACAATAAA | TGAAGTCGAA | AATGAAAAACA | AAAATATAGA | CTCCATTAAG  |
| 2b_Thai      | ATTGTCAGTA | ACACAATAAA | TGAAGTCGAA | AATGAAAAACA | AAAATATAGA | CTCCATTAAG  |
| Conservation | *****      | *****      | *****      | *****       | *****      | *****       |
|              |            |            |            |             |            |             |
|              | .... ....  | .... ....  | .... ....  | .... ....   | .... ....  | .... ....   |
|              | 2885       | 2895       | 2905       | 2915        | 2925       | 2935        |
| 2b_SalI      | AAAGTGAATA | TTGCAATGAA | ACGCTCCAGA | AGTAACCAAC  | AATCCGTTGA | ACAGCTAATC  |
| 2b_Thai      | AAAGTGAATA | TTGCAATGAA | ACGCTCCAGA | AGTAACCAAC  | AATCCGTTGA | ACAGCTAATC  |
| Conservation | *****      | *****      | *****      | *****       | *****      | *****       |
|              |            |            |            |             |            |             |
|              | .... ....  | .... ....  | .... ....  | .... ....   | .... ....  | .... ....   |
|              | 2945       | 2955       | 2965       | 2975        | 2985       | 2995        |
| 2b_SalI      | AGAAATAAGG | ATAATCTTCT | AAAAGAAAAA | ATGGAAAAAC  | ACTTTCAAAA | AATAAACACA  |
| 2b_Thai      | AGAAATAAGG | ATAATCTTCT | AAAAGAAAAA | ATGGAAAAAC  | ACTTTCAAAA | AATAAACACA  |
| Conservation | *****      | *****      | *****      | *****       | *****      | *****       |



|              |             |             |            |            |            |            |
|--------------|-------------|-------------|------------|------------|------------|------------|
|              | .... ....   | .... ....   | .... ....  | .... ....  | .... ....  | .... ....  |
|              | 3005        | 3015        | 3025       | 3035       | 3045       | 3055       |
| 2b_SalI      | GATGAAATAA  | TAGGACAAAG  | TGCCAAGGCA | AACTTGCTAA | ACAATCTAGA | GAGCGAAAAA |
| 2b_Thai      | GATGAAATAA  | TAGGACAAAG  | TGCCAAGGCA | AACTTGCTAA | ACAATCTAGA | GAGCGAAAAA |
| Conservation | *****       | *****       | *****      | *****      | *****      | *****      |
|              | .... ....   | .... ....   | .... ....  | .... ....  | .... ....  | .... ....  |
|              | 3065        | 3075        | 3085       | 3095       | 3105       | 3115       |
| 2b_SalI      | GCTATCATAA  | ACGAACAGTT  | AAATGACGCT | CATTTGAATG | ACCTAAAATT | GCAGATAGAA |
| 2b_Thai      | GCTATCATAA  | ACGAACAGTT  | AAATGACGCT | CATTTGAATG | ACCTAAAATT | GCAGATAGAA |
| Conservation | *****       | *****       | *****      | *****      | *****      | *****      |
|              | .... ....   | .... ....   | .... ....  | .... ....  | .... ....  | .... ....  |
|              | 3125        | 3135        | 3145       | 3155       | 3165       | 3175       |
| 2b_SalI      | AAAACCTCTAA | GTTATTGTGA  | AAAATCAAGG | GAAAATATTA | AAGGAAATAA | TGGAACACAT |
| 2b_Thai      | AAAACCTCTAA | GTTATTGTGA  | AAAATCAAGG | GAAAATATTA | AAGGAAATAA | TGGAACACAT |
| Conservation | *****       | *****       | *****      | *****      | *****      | *****      |
|              | .... ....   | .... ....   | .... ....  | .... ....  | .... ....  | .... ....  |
|              | 3185        | 3195        | 3205       | 3215       | 3225       | 3235       |
| 2b_SalI      | CCAGAAGAAT  | TAAACGCAAG  | CGAAATTGAG | TGGGAAGCTA | CGAAAGGAAA | AATAGAAACA |
| 2b_Thai      | CCAGAAGAAT  | TAAACGCAAG  | CGAAATTGAG | TGGGAAGCTA | CGAAAGGAAA | AATAGAAACA |
| Conservation | *****       | *****       | *****      | *****      | *****      | *****      |
|              | .... ....   | .... ....   | .... ....  | .... ....  | .... ....  | .... ....  |
|              | 3245        | 3255        | 3265       | 3275       | 3285       | 3295       |
| 2b_SalI      | CTAAACAGTA  | ATTATCAAGC  | GTTAAACAAA | AACATGGATG | ATATAATCAA | TAAGCAGCAC |
| 2b_Thai      | CTAAACAGTA  | ATTATCAAGC  | GTTAAACAAA | AACATGGATG | ATATAATCAA | TAAGCAGCAC |
| Conservation | *****       | *****       | *****      | *****      | *****      | *****      |
|              | .... ....   | .... ....   | .... ....  | .... ....  | .... ....  | .... ....  |
|              | 3305        | 3315        | 3325       | 3335       | 3345       | 3355       |
| 2b_SalI      | GATGAAATGA  | TAGTGTCTCAT | TGATAGAGAT | ATAAAGGAGA | AGGGAAAAGA | CATCGAGCTT |
| 2b_Thai      | GATGAAATGA  | TAGTGTCTCAT | TGATAGAGAT | ATAAAGGAGA | AGGGAAAAGA | CATCGAGCTT |
| Conservation | *****       | *****       | *****      | *****      | *****      | *****      |
|              | .... ....   | .... ....   | .... ....  | .... ....  | .... ....  | .... ....  |
|              | 3365        | 3375        | 3385       | 3395       | 3405       | 3415       |
| 2b_SalI      | AAAGTTGAGC  | AACGTATACA  | GGCGCTCGAA | AAAATGAAAG | CAAATTTGTC | CTCATTTGAT |
| 2b_Thai      | AAAGTTGAGC  | AACGTATACA  | GGCGCTCGAA | AAAATGAAAG | CAAATTTGTC | CTCATTTGAT |
| Conservation | *****       | *****       | *****      | *****      | *****      | *****      |
|              | .... ....   | .... ....   | .... ....  | .... ....  | .... ....  | .... ....  |
|              | 3425        | 3435        | 3445       | 3455       | 3465       | 3475       |
| 2b_SalI      | ACCAATGAGG  | ATGTTAAAAA  | ATACCAAAGT | GACATAAATA | AAGAAGAACT | CATAAAATTA |
| 2b_Thai      | ACCAATGAGG  | ATGTTAAAAA  | ATACCAAAGT | GACATAAATA | AAGAAGAACT | CATAAAATTA |
| Conservation | *****       | *****       | *****      | *****      | *****      | *****      |
|              | .... ....   | .... ....   | .... ....  | .... ....  | .... ....  | .... ....  |
|              | 3485        | 3495        | 3505       | 3515       | 3525       | 3535       |
| 2b_SalI      | AAAGAAATGT  | CCACTGCAGT  | CCTAAACAAA | ATTGATCAAA | ATAAAAATCA | ATTGATTAAC |
| 2b_Thai      | AAAGAAATGT  | CCACTGCAGT  | CCTAAACAAA | ATTGATCAAA | ATAAAAATCA | ATTGATTAAC |
| Conservation | *****       | *****       | *****      | *****      | *****      | *****      |
|              | .... ....   | .... ....   | .... ....  | .... ....  | .... ....  | .... ....  |
|              | 3545        | 3555        | 3565       | 3575       | 3585       | 3595       |
| 2b_SalI      | GTAAAGACAA  | AATCCAGTGG  | CTACGTCGCA | GAATCGAATG | GAATAAAAAA | TAAACAAACC |
| 2b_Thai      | GTAAAGACAA  | AATCCAGTGG  | CTACGTCGCA | GAATCGAATG | GAATAAAAAA | TAAACAAACC |
| Conservation | *****       | *****       | *****      | *****      | *****      | *****      |

|              |            |             |            |            |             |            |
|--------------|------------|-------------|------------|------------|-------------|------------|
|              | .... ....  | .... ....   | .... ....  | .... ....  | .... ....   | .... ....  |
|              | 3605       | 3615        | 3625       | 3635       | 3645        | 3655       |
| 2b_SalI      | GAACCGAGTC | AAGAGAAAAGA | CAAGCAAATT | GTGTACAACA | CAATAGGGG   | TGACATCGAA |
| 2b_Thai      | GAACCGAGTC | AAGAGAAAAGA | CAAGCAAATT | GTGTACAACA | CAATAGGGG   | TGACATCGAA |
| Conservation | *****      | *****       | *****      | *****      | *****       | *****      |
|              | .... ....  | .... ....   | .... ....  | .... ....  | .... ....   | .... ....  |
|              | 3665       | 3675        | 3685       | 3695       | 3705        | 3715       |
| 2b_SalI      | AAAGTTTATA | AAAACATTAG  | AGACATGTAC | AACGAACTGG | ATGATGTCTGA | AAAGGAAGAA |
| 2b_Thai      | AAAGTTTATA | AAAACATTAG  | AGACATGTAC | AACGAACTGG | ATGATGTCTGA | AAAGGGAGAA |
| Conservation | *****      | *****       | *****      | *****      | *****       | *****      |
|              | .... ....  | .... ....   | .... ....  | .... ....  | .... ....   | .... ....  |
|              | 3725       | 3735        | 3745       | 3755       | 3765        | 3775       |
| 2b_SalI      | ACCACCTCAA | ACGAAGTAGA  | CAACATAGAA | ATGCAGTATG | ACAGACTTTT  | AATCAATTTG |
| 2b_Thai      | ACCACCTCAA | ACGAAGTAGA  | CAACATAGAA | ATGCAGTATG | ACAGACTTTT  | AATCAATTTG |
| Conservation | *****      | *****       | *****      | *****      | *****       | *****      |
|              | .... ....  | .... ....   | .... ....  | .... ....  | .... ....   | .... ....  |
|              | 3785       | 3795        | 3805       | 3815       | 3825        | 3835       |
| 2b_SalI      | CTTGTTCAAA | AGATCAACGA  | AGAAAACACA | AAGGCGAAGG | GACTCATGGA  | AGAAATTTAA |
| 2b_Thai      | CTTGTTCAAA | AGATCAACGA  | AGAAAACACA | AAGGCGAAGG | GACTCATGGA  | AGAAATTTAA |
| Conservation | *****      | *****       | *****      | *****      | *****       | *****      |
|              | .... ....  | .... ....   | .... ....  | .... ....  | .... ....   | .... ....  |
|              | 3845       | 3855        | 3865       | 3875       | 3885        | 3895       |
| 2b_SalI      | TCATACATAG | AAAATATTGA  | AAGTGTACAG | GCCAAAATGT | CAGATGAAAC  | GCGAGAAGGC |
| 2b_Thai      | TCATACATAG | AAAATATTGA  | AAGTGTACAG | GCCAAAATGT | CAGATGAAAC  | GCGAGAAGGC |
| Conservation | *****      | *****       | *****      | *****      | *****       | *****      |
|              | .... ....  | .... ....   | .... ....  | .... ....  | .... ....   | .... ....  |
|              | 3905       | 3915        | 3925       | 3935       | 3945        | 3955       |
| 2b_SalI      | GCAACTGAGT | TTGAGTTTAA  | TCAATATCAG | CAGAGCAGTT | TAGCCAATGA  | TAAAAAAATT |
| 2b_Thai      | GCAACTGAGT | TTGAGTTTAA  | TCAATATCAG | CAGAGCAGTT | TAGCCAATGA  | TAAAAAAATT |
| Conservation | *****      | *****       | *****      | *****      | *****       | *****      |
|              | .... ....  | .... ....   | .... ....  | .... ....  | .... ....   | .... ....  |
|              | 3965       | 3975        | 3985       | 3995       | 4005        | 4015       |
| 2b_SalI      | ACCGAAATTG | TTCAACATGC  | TATAAATAAG | AAGGGAGAAG | CAGAAAAGAAG | TAAAAAAACG |
| 2b_Thai      | ACCGAAATTG | TTCAACATGC  | TATAAATAAG | AAGGGAGAAG | CAGAAAAGAAG | TAAAAAAACG |
| Conservation | *****      | *****       | *****      | *****      | *****       | *****      |
|              | .... ....  | .... ....   | .... ....  | .... ....  | .... ....   | .... ....  |
|              | 4025       | 4035        | 4045       | 4055       | 4065        | 4075       |
| 2b_SalI      | AATGAAGTAA | AATCCATCAA  | AAATGACGTT | AACACTTACA | TGCAACAAGT  | TATAGATGAA |
| 2b_Thai      | AATGAAGTAA | AATCCATCAA  | AAATGACGTT | AACACTTACA | TGCAACAAGT  | TATAGATGAA |
| Conservation | *****      | *****       | *****      | *****      | *****       | *****      |
|              | .... ....  | .... ....   | .... ....  | .... ....  | .... ....   | .... ....  |
|              | 4085       | 4095        | 4105       | 4115       | 4125        | 4135       |
| 2b_SalI      | TATAACGCTA | TGCAAAAAGGC | GTTAGGGGAT | ATTAAAAATG | TGAACGATTT  | ATTAATATCA |
| 2b_Thai      | TATAACGCTA | TGCAAAAAGGC | GTTAGGGGAT | ATTAAAAATG | TGAACGATTT  | ATTAATATCA |
| Conservation | *****      | *****       | *****      | *****      | *****       | *****      |
|              | .... ....  | .... ....   | .... ....  | .... ....  | .... ....   | .... ....  |
|              | 4145       | 4155        | 4165       | 4175       | 4185        | 4195       |
| 2b_SalI      | ACCAGTGGTA | GAAGAATCGC  | TGAAGAAATA | TCGAAGAGCA | CTAACGAAGC  | TGAGAATTTT |
| 2b_Thai      | ACCAGTGGTA | GAAGAATCGC  | TGAAGAAATA | TCGAAGAGCA | CTAACGAAGC  | TGAGAATTTT |
| Conservation | *****      | *****       | *****      | *****      | *****       | *****      |

```

      ....|....| ....|....| ....|....| ....|....| ....|....| ....|....|
      4205      4215      4225      4235      4245      4255
2b_SalI      GAAAAGCAAG CAAAAGGAGA ATTAGGAAAA ATAAATGATA TAATTGAAAA AATGGAAAAT
2b_Thai      GAAAAGCAAG CAAAAGGAGA ATTAGGAAAA ATAAATGATA TAATTGAAAA AATGGAAAAT
Conservation *****
      ....|....| ....|....| ....|....| ....|....| ....|....| ....|....|
      4265      4275      4285      4295      4305      4315
2b_SalI      CAAATGGTTC AGGCAAAGGA ACACGAAAAT AAAATTCATA TAAACTTAGA GGATAAACAA
2b_Thai      CAAATGGTTC AGGCAAAGGA ACACGAAAAT AAAATTCATA TAAACTTAGA GGATAAACAA
Conservation *****
      ....|....| ....|....| ....|....| ....|....| ....|....| ....|....|
      4325      4335      4345      4355      4365      4375
2b_SalI      ATAGATGAAG AAGTGC AAAA AATTAGACAA ATTCATGAAG AACTTATAAA TACGAAAATT
2b_Thai      ATAGATGAAG AAGTGC AAAA AATTAGACAA ATTCATGAAG AACTTATAAA TACGAAAATT
Conservation *****
      ....|....| ....|....| ....|....| ....|....| ....|....| ....|....|
      4385      4395      4405      4415      4425      4435
2b_SalI      GCAATGAATG AACATTTAAG TAAGACAAAA GCCGCTAAAG AAAATTGCCT TTCCAAGTC
2b_Thai      GCAATGAATG AACATTTAAG TAAGACAAAA GCCGCTAAAG AAAATTGCCT TTCCAAGTC
Conservation *****
      ....|....| ....|....| ....|....| ....|....| ....|....| ....|....|
      4445      4455      4465      4475      4485      4495
2b_SalI      CGTAATGCCG AGAGGGGGAA AATTAAAAATA GATTTTCTCA ATAATAACAA ACAAAGTAGC
2b_Thai      CGTAATGCCG AGAGGGGGAA AATTAAAAATA GATTTTCTCA ATAATAACAA ACAAAGTAGC
Conservation *****
      ....|....| ....|....| ....|....| ....|....| ....|....| ....|....|
      4505      4515      4525      4535      4545      4555
2b_SalI      AATTTGAAAG ACGTCAATAT GGATCATGTA ACTAAAAATA TTGCCGACTG TGTGGAACAC
2b_Thai      AATTTGAAAG ACGTCAATAT GGATCATGTA ACTAAAAATA TTGCCGACTG TGTGGAACAC
Conservation *****
      ....|....| ....|....| ....|....| ....|....| ....|....| ....|....|
      4565      4575      4585      4595      4605      4615
2b_SalI      TCAAAAGAAG TTAATAAAAC TGAAAAACGAA GCTGAAAAGG AACATGACCT ATTCCAGTAA
2b_Thai      TCAAAAGAAG TTAATAAAAC TGAAAAAGAA GCTGAAAAGG AACATGACCT ATTCCAGTAA
Conservation *****
      ....|....| ....|....| ....|....| ....|....| ....|....| ....|....|
      4625      4635      4645      4655      4665      4675
2b_SalI      TATGAAAAAG ATATTACCAG CATATTAAAC AGATCCTCAA TTTTAGGAAT AGAAACAAAA
2b_Thai      TATGAAAAAG ATATTACCAG CATATTAAAC AGATCCTCAA TTTTAGGAAT AGAAACAAAA
Conservation *****
      ....|....| ....|....| ....|....| ....|....| ....|....| ....|....|
      4685      4695      4705      4715      4725      4735
2b_SalI      TCGAAAAAAA GAAAAACGA AGCTACCAAA ATAATGGGCC AAATGAGGG GGAACATTCT
2b_Thai      TCGAAAAAAA GAAAAACGA AGCTACCAAA ATAATGGGCC AAATGAGGG GGAACATTCT
Conservation *****
      ....|....| ....|....| ....|....| ....|....| ....|....| ....|....|
      4745      4755      4765      4775      4785      4795
2b_SalI      ATAATTAATA CGGAACCTCA ACAATCTTCA GAAAATTTTA AACAACTGAA TGAAAAATAT
2b_Thai      ATAATTAATA CGGAACCTCA ACAATCTTCA GAAAATTTTA AACAACTGAA TGAAAAATAT
Conservation *****

```

|              |            |            |             |            |            |            |
|--------------|------------|------------|-------------|------------|------------|------------|
|              | .... ....  | .... ....  | .... ....   | .... ....  | .... ....  | .... ....  |
|              | 4805       | 4815       | 4825        | 4835       | 4845       | 4855       |
| 2b_SalI      | AACCTTAGCG | AAGAAAAAAG | TATGCTTGCC  | AATCCCACAT | CCACCAAAGC | AAATGAGTCC |
| 2b_Thai      | AACCTTAGCG | AAGAAGAAAG | TATGCTTGCC  | AATCCCACAT | CCACCAAAGC | AAATGAGTCC |
| Conservation | *****      | *****      | *****       | *****      | *****      | *****      |
|              |            |            |             |            |            |            |
|              | .... ....  | .... ....  | .... ....   | .... ....  | .... ....  | .... ....  |
|              | 4865       | 4875       | 4885        | 4895       | 4905       | 4915       |
| 2b_SalI      | ATACAGTATA | ACATAGGCAA | GGTGAAACAA  | AATTTGTTAT | ACATAGACAA | TATAGCGAAA |
| 2b_Thai      | ATACAGTATA | ACATAGGCAA | GGTGAAACAA  | AATTTGTTAT | ACATAGACAA | TATAGCGAAA |
| Conservation | *****      | *****      | *****       | *****      | *****      | *****      |
|              |            |            |             |            |            |            |
|              | .... ....  | .... ....  | .... ....   | .... ....  | .... ....  | .... ....  |
|              | 4925       | 4935       | 4945        | 4955       | 4965       | 4975       |
| 2b_SalI      | GAAGTAGACA | CTATTTTAAC | TAACGCACAA  | GATTCAATTA | GATCAATATC | GCAGATTTCC |
| 2b_Thai      | GAAGTAGACA | CTATTTTAAC | TAACGCACAA  | GATTCAATTA | GATCAATATC | GCAGATTTCC |
| Conservation | *****      | *****      | *****       | *****      | *****      | *****      |
|              |            |            |             |            |            |            |
|              | .... ....  | .... ....  | .... ....   | .... ....  | .... ....  | .... ....  |
|              | 4985       | 4995       | 5005        | 5015       | 5025       | 5035       |
| 2b_SalI      | AAACTAGACG | GAAGGAATAC | ACTACAATG   | GTGGAAAAGG | AAGCAGCAGA | TTATGTAAAA |
| 2b_Thai      | AAACTAGACG | GAAGGAATAC | ACTACAATG   | GTGGAAAAGG | AAGCAGCAGA | TTATGTAAAA |
| Conservation | *****      | *****      | *****       | *****      | *****      | *****      |
|              |            |            |             |            |            |            |
|              | .... ....  | .... ....  | .... ....   | .... ....  | .... ....  | .... ....  |
|              | 5045       | 5055       | 5065        | 5075       | 5085       | 5095       |
| 2b_SalI      | TATTTAGACA | AAATAACCAA | AGAGAAGGAA  | CTAATGAATG | ATAAACACAA | AGACCTCAAT |
| 2b_Thai      | TATTTAGACA | AAATAACCAA | AGAGAAGGAA  | CTAATGAATG | ATAAACACAA | AGACCTCAAT |
| Conservation | *****      | *****      | *****       | *****      | *****      | *****      |
|              |            |            |             |            |            |            |
|              | .... ....  | .... ....  | .... ....   | .... ....  | .... ....  | .... ....  |
|              | 5105       | 5115       | 5125        | 5135       | 5145       | 5155       |
| 2b_SalI      | CCCATAAAGT | CCGATATTGC | AAATATAGAA  | ACAGAATTGA | AAAAGCATAG | GAAACTTTTC |
| 2b_Thai      | CCCATAAAGT | CCGATATTGC | AAATATAGAA  | ACAGAATTGA | AAAAGCATAG | GAAACTTTTC |
| Conservation | *****      | *****      | *****       | *****      | *****      | *****      |
|              |            |            |             |            |            |            |
|              | .... ....  | .... ....  | .... ....   | .... ....  | .... ....  | .... ....  |
|              | 5165       | 5175       | 5185        | 5195       | 5205       | 5215       |
| 2b_SalI      | GAAATAGGAC | TTTTGAATAA | GGTTATCGAG  | ATAGCTAAAA | CGAGAAAATT | GTACATGGAT |
| 2b_Thai      | GAAATAGGAC | TTTTGAATAA | GGTTATCGAG  | ATAGCTAAAA | CGAGAAAATT | GTACATGGAT |
| Conservation | *****      | *****      | *****       | *****      | *****      | *****      |
|              |            |            |             |            |            |            |
|              | .... ....  | .... ....  | .... ....   | .... ....  | .... ....  | .... ....  |
|              | 5225       | 5235       | 5245        | 5255       | 5265       | 5275       |
| 2b_SalI      | TCAGTGGAAC | AGCTCCTAAA | TTCCCTCCATC | AATAATTTTG | TTACCCTCTT | TAATGGGTTC |
| 2b_Thai      | TCAGTGGAAC | AGCTCCTAAA | TTCCCTCCATC | AATAATTTTG | TTACCCTCTT | TAATGGGTTC |
| Conservation | *****      | *****      | *****       | *****      | *****      | *****      |
|              |            |            |             |            |            |            |
|              | .... ....  | .... ....  | .... ....   | .... ....  | .... ....  | .... ....  |
|              | 5285       | 5295       | 5305        | 5315       | 5325       | 5335       |
| 2b_SalI      | AATTTAAAAA | AATATAAAAT | TGAAACCAGT  | TTAGACGTTT | ATAAAGGAAA | AATAAGTGAA |
| 2b_Thai      | AATTTAAAAA | AATATAAAAT | TGAAACCAGT  | TTAGACGTTT | ATAAAGGAAA | AATAAGTGAA |
| Conservation | *****      | *****      | *****       | *****      | *****      | *****      |
|              |            |            |             |            |            |            |
|              | .... ....  | .... ....  | .... ....   | .... ....  | .... ....  | .... ....  |
|              | 5345       | 5355       | 5365        | 5375       | 5385       | 5395       |
| 2b_SalI      | TTCCACACTG | AATTCCTTCA | GCCATACGAA  | TCAATTCAAA | ATAAGGAAAA | ACGCGTACTG |
| 2b_Thai      | TTCCACACTG | AATTCCTTCA | GCCATACGAA  | TCAATTCAAA | ATAAGGAAAA | ACGCGTACTG |
| Conservation | *****      | *****      | *****       | *****      | *****      | *****      |

|              |            |            |            |            |            |            |
|--------------|------------|------------|------------|------------|------------|------------|
|              | .... ....  | .... ....  | .... ....  | .... ....  | .... ....  | .... ....  |
|              | 5405       | 5415       | 5425       | 5435       | 5445       | 5455       |
| 2b_SalI      | GACCCTTCGG | TAGATTTTAG | TGCAGCAAAA | AATATGCGAG | AAGAAGCTCA | AAAGGAGGAA |
| 2b_Thai      | GACCCTTCGG | TAGATTTTAG | TGCAGCAAAA | AATATGCGAG | AAGAAGCTCA | AAAGGAGGAA |
| Conservation | *****      | *****      | *****      | *****      | *****      | *****      |
|              |            |            |            |            |            |            |
|              | .... ....  | .... ....  | .... ....  | .... ....  | .... ....  | .... ....  |
|              | 5465       | 5475       | 5485       | 5495       | 5505       | 5515       |
| 2b_SalI      | AAAAATATCG | AAAATGTAGA | AAAAAAGACA | AAAAATATC  | TAAGCGATAT | TAACAAAATG |
| 2b_Thai      | AAAAATATCG | AAAATGTAGA | AAAAAAGACA | AAAAATATC  | TAAGCGATAT | TAACAAAATG |
| Conservation | *****      | *****      | *****      | *****      | *****      | *****      |
|              |            |            |            |            |            |            |
|              | .... ....  | .... ....  | .... ....  | .... ....  | .... ....  | .... ....  |
|              | 5525       | 5535       | 5545       | 5555       | 5565       | 5575       |
| 2b_SalI      | GAATCCTTTA | CATTCATACG | TAATATGAGA | CAAACCTTGG | ATGAACTAAG | CAAAACATGC |
| 2b_Thai      | GAATCCTTTA | CATTCATACG | TAATATGAGA | CAAACCTTGG | ATGAACTAAG | CAAAACATGC |
| Conservation | *****      | *****      | *****      | *****      | *****      | *****      |
|              |            |            |            |            |            |            |
|              | .... ....  | .... ....  | .... ....  | .... ....  | .... ....  | .... ....  |
|              | 5585       | 5595       | 5605       | 5615       | 5625       | 5635       |
| 2b_SalI      | AAACAGGAAT | ACGCAGAAGT | CGAGGGAGGT | CACAAAGACA | TTGAAAAAAT | CATAGAAGAT |
| 2b_Thai      | AAACAGGAAT | ACGCAGAAGT | CGAGGGAGGT | CACAAAGACA | TTGAAAAAAT | CATAGAAGAT |
| Conservation | *****      | *****      | *****      | *****      | *****      | *****      |
|              |            |            |            |            |            |            |
|              | .... ....  | .... ....  | .... ....  | .... ....  | .... ....  | .... ....  |
|              | 5645       | 5655       | 5665       | 5675       | 5685       | 5695       |
| 2b_SalI      | ATTAAGAGCC | TAAACGATGA | AAGTGGCTCG | TCAGCTAAAT | TACAACAAGC | AGAGGATAAA |
| 2b_Thai      | ATTAAGAGCC | TAAACGATGA | AAGTGGCTCG | TCAGCTAAAT | TACAACAAGC | AGAGGATAAA |
| Conservation | *****      | *****      | *****      | *****      | *****      | *****      |
|              |            |            |            |            |            |            |
|              | .... ....  | .... ....  | .... ....  | .... ....  | .... ....  | .... ....  |
|              | 5705       | 5715       | 5725       | 5735       | 5745       | 5755       |
| 2b_SalI      | AATAGCCAAA | TGAAAGCCAA | AGTGAATCAT | TATTCACTTA | AGAAAGAGGC | ACACACTATA |
| 2b_Thai      | AATAGCCAAA | TGAAAGCCAA | AGTGAATCAT | TATTCACTTA | AGAAAGAGGC | ACACACTATA |
| Conservation | *****      | *****      | *****      | *****      | *****      | *****      |
|              |            |            |            |            |            |            |
|              | .... ....  | .... ....  | .... ....  | .... ....  | .... ....  | .... ....  |
|              | 5765       | 5775       | 5785       | 5795       | 5805       | 5815       |
| 2b_SalI      | TTAGAACAAA | TTGTCAAATC | AGCCAAATTT | GTAGGCATTA | CAATAGTGAC | AGCGTTACAG |
| 2b_Thai      | TTAGAACAAA | TTGTCAAATC | AGCCAAATTT | GTAGGCATTA | CAATAGTGAC | AGCGTTACAG |
| Conservation | *****      | *****      | *****      | *****      | *****      | *****      |
|              |            |            |            |            |            |            |
|              | .... ....  | .... ....  | .... ....  | .... ....  | .... ....  | .... ....  |
|              | 5825       | 5835       | 5845       | 5855       | 5865       | 5875       |
| 2b_SalI      | CCATCAGATT | TAGCTGCTAA | AGCGAGTTTG | CAAAAAGCAC | CAGAATTGCA | GTTTGAATCC |
| 2b_Thai      | CCATCAGATT | TAGCTGCTAA | AGCGAGTTTG | CAAAAAGCAC | CAGAATTGCA | GTTTGAATCC |
| Conservation | *****      | *****      | *****      | *****      | *****      | *****      |
|              |            |            |            |            |            |            |
|              | .... ....  | .... ....  | .... ....  | .... ....  | .... ....  | .... ....  |
|              | 5885       | 5895       | 5905       | 5915       | 5925       | 5935       |
| 2b_SalI      | CAATCCAAAG | TAACACTAGA | AAGCGGACAA | TTCTTAGAAA | AAAAAAACCA | ATTGGATGTC |
| 2b_Thai      | CAATCCAAAG | TAACACTAGA | AAGCGGACAA | TTCTTAGAAA | AAAAAAACCA | ATTGGATGTC |
| Conservation | *****      | *****      | *****      | *****      | *****      | *****      |
|              |            |            |            |            |            |            |
|              | .... ....  | .... ....  | .... ....  | .... ....  | .... ....  | .... ....  |
|              | 5945       | 5955       | 5965       | 5975       | 5985       | 5995       |
| 2b_SalI      | CACGAAAATG | TGCAAGCCGC | CTACAATACC | GTTCTTCAGA | TATACAAATA | TTCAGATGAT |
| 2b_Thai      | CACGAAAATG | TGCAAGCCGC | CTACAATACC | GTTCTTCAGA | TATACAAATA | TTCAGATGAT |
| Conservation | *****      | *****      | *****      | *****      | *****      | *****      |

|              |            |             |            |            |            |            |
|--------------|------------|-------------|------------|------------|------------|------------|
|              | .... ....  | .... ....   | .... ....  | .... ....  | .... ....  | .... ....  |
|              | 6005       | 6015        | 6025       | 6035       | 6045       | 6055       |
| 2b_SalI      | ATAGTAAGGA | AGCAGGAAAA  | ATGCGAACAA | TTAGTAAAAG | ACGGAAAAGA | TATATGCCTT |
| 2b_Thai      | ATAGTAAGGA | AGCAGGAAAA  | ATGCGAACAA | TTAGTAAAAG | ACGGAAAAGA | TATATGCCTT |
| Conservation | *****      | *****       | *****      | *****      | *****      | *****      |
|              |            |             |            |            |            |            |
|              | .... ....  | .... ....   | .... ....  | .... ....  | .... ....  | .... ....  |
|              | 6065       | 6075        | 6085       | 6095       | 6105       | 6115       |
| 2b_SalI      | AAATTCAAAT | CAATAAACGA  | AATTAAAGTT | ATGATTCAAA | ATAGTAAGGG | AAAAGAAAGC |
| 2b_Thai      | AAATTCAAAT | CAATAAACGA  | AATTAAAGTT | ATGATTCAAA | ATAGTAAGGG | AAAAGAAAGC |
| Conservation | *****      | *****       | *****      | *****      | *****      | *****      |
|              |            |             |            |            |            |            |
|              | .... ....  | .... ....   | .... ....  | .... ....  | .... ....  | .... ....  |
|              | 6125       | 6135        | 6145       | 6155       | 6165       | 6175       |
| 2b_SalI      | ACCCTTTCAG | CCAAAGTGAG  | TCACTCCTTT | AACAAGCTAA | GTGAGCTAAA | CAAATTAAG  |
| 2b_Thai      | ACCCTTTCAG | CCAAAGTGAG  | TCACTCCTTT | AACAAGCTAA | GTGAGCTAAA | CAAATTAAG  |
| Conservation | *****      | *****       | *****      | *****      | *****      | *****      |
|              |            |             |            |            |            |            |
|              | .... ....  | .... ....   | .... ....  | .... ....  | .... ....  | .... ....  |
|              | 6185       | 6195        | 6205       | 6215       | 6225       | 6235       |
| 2b_SalI      | TGCAATGATG | AAAGTTACGA  | TGCCATTTTG | GAAACACCCA | GTAGGGAAGA | ACTAAACAAA |
| 2b_Thai      | TGCAATGATG | AAAGTTACGA  | TGCCATTTTG | GAAACACCCA | GTAGGGAAGA | ACTAAACAAA |
| Conservation | *****      | *****       | *****      | *****      | *****      | *****      |
|              |            |             |            |            |            |            |
|              | .... ....  | .... ....   | .... ....  | .... ....  | .... ....  | .... ....  |
|              | 6245       | 6255        | 6265       | 6275       | 6285       | 6295       |
| 2b_SalI      | CTAAGGAGCA | CATTTAAACA  | AGAGAAAGAC | ACCATCGCAA | ACCAAGCAAA | ATTGAGTGGC |
| 2b_Thai      | CTAAGGAGCA | CATTTAAACA  | AGAGAAAGAC | ACCATCGCAA | ACCAAGCAAA | ATTGAGTGGC |
| Conservation | *****      | *****       | *****      | *****      | *****      | *****      |
|              |            |             |            |            |            |            |
|              | .... ....  | .... ....   | .... ....  | .... ....  | .... ....  | .... ....  |
|              | 6305       | 6315        | 6325       | 6335       | 6345       | 6355       |
| 2b_SalI      | TATAAAACAG | ATTTTCGAAAC | TCACATTGGA | AAATTAATG  | ACTTAGCCAA | AATAGTGGAC |
| 2b_Thai      | TATAAAACAG | ATTTTCGAAAC | TCACATTGGA | AAATTAATG  | ACTTAGCCAA | AATAGTGGAC |
| Conservation | *****      | *****       | *****      | *****      | *****      | *****      |
|              |            |             |            |            |            |            |
|              | .... ....  | .... ....   | .... ....  | .... ....  | .... ....  | .... ....  |
|              | 6365       | 6375        | 6385       | 6395       | 6405       | 6415       |
| 2b_SalI      | AACTTAAAG  | CCAGCGAAAC  | TCTTCCAAAA | AATATAGAAG | AAAAAAAAAC | GTCCATCAAC |
| 2b_Thai      | AACTTAAAG  | CCAGCGAAAC  | TCTTCCAAAA | AATATAGAAG | AAAAAAAAAC | GTCCATCAAC |
| Conservation | *****      | *****       | *****      | *****      | *****      | *****      |
|              |            |             |            |            |            |            |
|              | .... ....  | .... ....   | .... ....  | .... ....  | .... ....  | .... ....  |
|              | 6425       | 6435        | 6445       | 6455       | 6465       | 6475       |
| 2b_SalI      | CTAATTTCAA | CCAAATTGGA  | AACCATCGAA | AAGGAAATTG | AAAGTATTAA | TTCTCCTTT  |
| 2b_Thai      | CTAATTTCAA | CCAAATTGGA  | AACCATCGAA | AAGGAAATTG | AAAGTATTAA | TTCTCCTTT  |
| Conservation | *****      | *****       | *****      | *****      | *****      | *****      |
|              |            |             |            |            |            |            |
|              | .... ....  | .... ....   | .... ....  | .... ....  | .... ....  | .... ....  |
|              | 6485       | 6495        | 6505       | 6515       | 6525       | 6535       |
| 2b_SalI      | GATCAGTTGC | TCGAGAAAGG  | AAAGAAGTGC | GAAATGACGA | AGTACAAATT | GGTAAGGGAT |
| 2b_Thai      | GATCAGTTGC | TCGAGAAAGG  | AAAGAAGTGC | GAAATGACGA | AGTACAAATT | GGTAAGGGAT |
| Conservation | *****      | *****       | *****      | *****      | *****      | *****      |
|              |            |             |            |            |            |            |
|              | .... ....  | .... ....   | .... ....  | .... ....  | .... ....  | .... ....  |
|              | 6545       | 6555        | 6565       | 6575       | 6585       | 6595       |
| 2b_SalI      | AGCCTAAGCA | CTAAAATAAA  | TGACCATTCT | GCAATCATTA | AGGACAACCA | AAAAAAGCC  |
| 2b_Thai      | AGCCTAAGCA | CTAAAATAAA  | TGACCATTCT | GCAATCATTA | AGGACAACCA | AAAAAAGCC  |
| Conservation | *****      | *****       | *****      | *****      | *****      | *****      |

```

      ....|....| ....|....| ....|....| ....|....| ....|....| ....|....|
      6605      6615      6625      6635      6645      6655
2b_SalI  ACTGAATATT TAACGTACAT TCAAAATAAT CACATTTCCA TATTTAAAGA CATTGATATG
2b_Thai  ACTGAATATT TAACGTACAT TCAAAATAAT CACATTTCCA TATTTAAAGA CATTGATATG
Conservation *****
      ....|....| ....|....| ....|....| ....|....| ....|....|
      6665      6675      6685      6695      6705      6715
2b_SalI  CTAAATGAAA ACCTGGGTGA AAAATCCGTA AGTAGGTATG CCATAGCCAA AATCGAAGAA
2b_Thai  ATAAATGAAA ACCTGGGTGA AAAATCCGTA AGTAGGTATG CCATAGCCAA AATCGAAGAA
Conservation .*****
      ....|....| ....|....| ....|....| ....|....| ....|....|
      6725      6735      6745      6755      6765      6775
2b_SalI  GCAAATGATC TTTCCGCACA ACTAACCGCT GCAGTTAGTG AATACGAAGC GATAGCTAAT
2b_Thai  GCAAATGATC TTTCCGCACA GCTAACCGCT GCAGTTAGTG AATACGAAGC GATAGCTAAT
Conservation *****
      ....|....| ....|....| ....|....| ....|....| ....|....|
      6785      6795      6805      6815      6825      6835
2b_SalI  TCTATTAGAA AAGAATTTAC AAATATAAGT GACCACACCG AAATGGACAC TCTTGAAAAT
2b_Thai  TTTATTAGAA AAAAAATTTAC AAATATAAGT GACCACACCG AAATGGACAC TCTTGAAAAT
Conservation * *****
      ....|....| ....|....| ....|....| ....|....| ....|....|
      6845      6855      6865      6875      6885      6895
2b_SalI  GAGGCAAAAA TGTTGAAAGA ACATTATGAC AATCTAATAA ATAAAAAAAAA CATCATAACA
2b_Thai  GAGGCAAAAA TGTTGAAAGA ACATTATGAC AATCTAATAA ATAAAAAAAAA CATCATAACA
Conservation *****
      ....|....| ....|....| ....|....| ....|....| ....|....|
      6905      6915      6925      6935      6945      6955
2b_SalI  GAATTACATA ACAAATTTAA TTTAATTTAA CTGCTTGAAA TAAGAGCCAC CTCTGATAAA
2b_Thai  GAATTACATA ACAAATTTAA TTTAATTTAA CTGCTTGAAA TAAGAGCCAC CTTTGATAAA
Conservation *****
      ....|....| ....|....| ....|....| ....|....| ....|....|
      6965      6975      6985      6995      7005      7015
2b_SalI  TACGTCGATA TAGCTGAACT GCTTGCGCAA GTAGTAAAGG ATCAAAAAAAAA AAAGTTACAA
2b_Thai  TACGTCGATA TAGCTGAACT GCTTGCGCAA GTAGTAAAGG ATCAAAAAAAAA AAAGTTACAA
Conservation *****
      ....|....| ....|....| ....|....| ....|....| ....|....|
      7025      7035      7045      7055      7065      7075
2b_SalI  GAAGCAAAAA ATAAACTGGA CACGCTTAAA GACCATATAG CAGTTAAAGA AAAGGAGTTA
2b_Thai  GAAGCAAAAA ATAAACTGGA CACGCTTAAA GACCATATAG CAGTTAAAGA AAAGGAGTTA
Conservation *****
      ....|....| ....|....| ....|....| ....|....| ....|....|
      7085      7095      7105      7115      7125      7135
2b_SalI  ATCAACCATG ACAGCTCCTT CACCTAGTG TCCATTAAAG CGTTCGACGA AATATATGAT
2b_Thai  ATCAACCATG ACAGCTCCTT CACCTAGTG TCCATTAAAG CGTTCGACGA AATATATGAT
Conservation *****
      ....|....| ....|....| ....|....| ....|....| ....|....|
      7145      7155      7165      7175      7185      7195
2b_SalI  GACATTTAAAT ATAATGTAGG CCAATTGCAC ACATTAGAAG TAACTAACTT TGATGAACTT
2b_Thai  GACATTTAAAT ATAATGTAGG CCAATTGCAC ACATTAGAAG TAACTAACTT TGATGAACTT
Conservation *****

```

|              |            |            |            |            |            |            |
|--------------|------------|------------|------------|------------|------------|------------|
|              | .... ....  | .... ....  | .... ....  | .... ....  | .... ....  | .... ....  |
|              | 7205       | 7215       | 7225       | 7235       | 7245       | 7255       |
| 2b_SalI      | AAAAAAGGTA | AAACGTATGA | AGAAAATGTT | ACCCATTTAT | TAAACAGAAG | GGAAACCTTA |
| 2b_Thai      | AAAAAAGGTA | AAACGTATGA | AGAAAATGTT | ACCCATTTAT | TAAACAGAAG | GGAAACCTTA |
| Conservation | *****      | *****      | *****      | *****      | *****      | *****      |
|              |            |            |            |            |            |            |
|              | .... ....  | .... ....  | .... ....  | .... ....  | .... ....  | .... ....  |
|              | 7265       | 7275       | 7285       | 7295       | 7305       | 7315       |
| 2b_SalI      | CAGAATGATC | TCCACAATTA | TGAAGAAAAA | GACAAACTGA | AAAATACAAA | TATAGAAATG |
| 2b_Thai      | CAGAATGATC | TCCACAATTA | TGAAGAAAAA | GACAAACTGA | AAAATACAAA | TATAGAAATG |
| Conservation | *****      | *****      | *****      | *****      | *****      | *****      |
|              |            |            |            |            |            |            |
|              | .... ....  | .... ....  | .... ....  | .... ....  | .... ....  | .... ....  |
|              | 7325       | 7335       | 7345       | 7355       | 7365       | 7375       |
| 2b_SalI      | TCAAATGAAG | AAAACAACCA | AATAAGACAA | ACCAGTGAAG | TAATAAAAAA | ATTAGAAAGC |
| 2b_Thai      | TCAAATGAAG | AAAACAACCA | AATAAGACAA | ACCAGTGAAG | TAATAAAAAA | ATTAGAAAGC |
| Conservation | *****      | *****      | *****      | *****      | *****      | *****      |
|              |            |            |            |            |            |            |
|              | .... ....  | .... ....  | .... ....  | .... ....  | .... ....  | .... ....  |
|              | 7385       | 7395       | 7405       | 7415       | 7425       | 7435       |
| 2b_SalI      | GAATTTCAAA | ACTTGCTAAA | AATTATTCAA | CAAAGTAACA | CGCTATGCAG | TAATGATAAT |
| 2b_Thai      | GAATTTCAAA | ACTTGCTAAA | AATTATTCAA | CAAAGTAACA | CGCTATGCAG | TAATGATAAT |
| Conservation | *****      | *****      | *****      | *****      | *****      | *****      |
|              |            |            |            |            |            |            |
|              | .... ....  | .... ....  | .... ....  | .... ....  | .... ....  | .... ....  |
|              | 7445       | 7455       | 7465       | 7475       | 7485       | 7495       |
| 2b_SalI      | ATAAAACAGT | TCATTTCTGA | TATTCTAAAA | AAAGTGAAA  | CTATTAGAGA | AAGGTTTGTC |
| 2b_Thai      | ATAAAACAGT | TCATTTCTGA | TATTCTAAAA | AAAGTGAAA  | CTATTAGAGA | AAGGTTTGTC |
| Conservation | *****      | *****      | *****      | *****      | *****      | *****      |
|              |            |            |            |            |            |            |
|              | .... ....  | .... ....  | .... ....  | .... ....  | .... ....  | .... ....  |
|              | 7505       | 7515       | 7525       | 7535       | 7545       | 7555       |
| 2b_SalI      | AAGAATTTCC | CCGAGAGAGA | GAAGTACCAT | CAAATAGAAA | TCAACTACAA | CGAAATTAAT |
| 2b_Thai      | AAGAATTTCC | CCGAGAGAGA | GAAGTACCAT | CAAATAGAAA | TCAACTACAA | CGAAATTAAT |
| Conservation | *****      | *****      | *****      | *****      | *****      | *****      |
|              |            |            |            |            |            |            |
|              | .... ....  | .... ....  | .... ....  | .... ....  | .... ....  | .... ....  |
|              | 7565       | 7575       | 7585       | 7595       | 7605       | 7615       |
| 2b_SalI      | GGCATTGTTA | AAGAAGTAGA | TACAAATCCA | GAAATAAGCA | TATTTACTGA | AAAAATAAAT |
| 2b_Thai      | GGCATTGTTA | AAGAAGTAGA | TACAAATCCA | GAAATAAGCA | TATTTACTGA | AAAAATAAAT |
| Conservation | *****      | *****      | *****      | *****      | *****      | *****      |
|              |            |            |            |            |            |            |
|              | .... ....  | .... ....  | .... ....  | .... ....  | .... ....  | .... ....  |
|              | 7625       | 7635       | 7645       | 7655       | 7665       | 7675       |
| 2b_SalI      | ACATATATAC | GGCAAAAAAT | TAGAAGCGCT | CACCATTTGG | AAGATGCCCA | AAAAATAAAA |
| 2b_Thai      | ACATATATAC | GGCAAAAAAT | TAGAAGCGCT | CACCATTTGG | AAGATGCCCA | AAAAATAAAA |
| Conservation | *****      | *****      | *****      | *****      | *****      | *****      |
|              |            |            |            |            |            |            |
|              | .... ....  | .... ....  | .... ....  | .... ....  | .... ....  | .... ....  |
|              | 7685       | 7695       | 7705       | 7715       | 7725       | 7735       |
| 2b_SalI      | GACATAATAG | AAGATGTTAC | AAGTAACTAT | AGAAAAATAA | AAAGTAAACT | CTCTCAAGTT |
| 2b_Thai      | GACATAATAG | AAGATGTTAC | AAGTAACTAT | AGAAAAATAA | AAAGTAAACT | CTCTCAAGTT |
| Conservation | *****      | *****      | *****      | *****      | *****      | *****      |
|              |            |            |            |            |            |            |
|              | .... ....  | .... ....  | .... ....  | .... ....  | .... ....  | .... ....  |
|              | 7745       | 7755       | 7765       | 7775       | 7785       | 7795       |
| 2b_SalI      | AATAACGCTT | TAGATAGAAT | TAAAATAAAG | AAAAGTGAGA | TGGATACCCT | ATTTGAATCA |
| 2b_Thai      | AATAACGCTT | TAGATAGAAT | TAAAATAAAG | AAAAGTGAGA | TGGATACCCT | ATTTGAATCA |
| Conservation | *****      | *****      | *****      | *****      | *****      | *****      |



|              |             |            |            |            |            |            |
|--------------|-------------|------------|------------|------------|------------|------------|
|              | .... ....   | .... ....  | .... ....  | .... ....  | .... ....  | .... ....  |
|              | 7805        | 7815       | 7825       | 7835       | 7845       | 7855       |
| 2b_SalI      | TTGTCCAAAG  | AAAATGCCAA | TAATTATAAT | TCCGCAAAAT | ATTTTITAGT | CGATTCCGAT |
| 2b_Thai      | TTGTCCAAAG  | AAAATGCCAA | TAATTATAAT | TCCGCAAAAT | ATTTTITAGT | CGATTCCGAT |
| Conservation | *****       | *****      | *****      | *****      | *****      | *****      |
|              |             |            |            |            |            |            |
|              | .... ....   | .... ....  | .... ....  | .... ....  | .... ....  | .... ....  |
|              | 7865        | 7875       | 7885       | 7895       | 7905       | 7915       |
| 2b_SalI      | AAAATAATTA  | AGCATTTAGA | AGACCAAGTT | AGCAAAATGT | CAAGCTTAAT | AAGTTACGCC |
| 2b_Thai      | AAAATAATTA  | AGCATTTAGA | AGACCAAGTT | AGCAAAATGT | CAAGCTTAAT | AAGTTACGCC |
| Conservation | *****       | *****      | *****      | *****      | *****      | *****      |
|              |             |            |            |            |            |            |
|              | .... ....   | .... ....  | .... ....  | .... ....  | .... ....  | .... ....  |
|              | 7925        | 7935       | 7945       | 7955       | 7965       | 7975       |
| 2b_SalI      | GAAAGGGAAA  | TAAAAGAATT | AGAAGAAAAA | GTGTATAGCA | TATTAAATCG | ACCTGTTATT |
| 2b_Thai      | GAAAGGGAAA  | TAAAAGAATT | AGAAGAAAAA | GTGTATAGCA | TATTAAATCG | ACCTGTTATT |
| Conservation | *****       | *****      | *****      | *****      | *****      | *****      |
|              |             |            |            |            |            |            |
|              | .... ....   | .... ....  | .... ....  | .... ....  | .... ....  | .... ....  |
|              | 7985        | 7995       | 8005       | 8015       | 8025       | 8035       |
| 2b_SalI      | GATAACTCCG  | CTTCGGAGCA | AATCAAAGTT | TTAAGTGATA | CCCAAGAGAA | CGATACAGAC |
| 2b_Thai      | GATAACTCCG  | CTTCGGAGCA | AATCAAAGTT | TTAAGTGATA | CCCAAGAGAA | CGATACAGAC |
| Conservation | *****       | *****      | *****      | *****      | *****      | *****      |
|              |             |            |            |            |            |            |
|              | .... ....   | .... ....  | .... ....  | .... ....  | .... ....  | .... ....  |
|              | 8045        | 8055       | 8065       | 8075       | 8085       | 8095       |
| 2b_SalI      | GAAGCTCAAA  | AACGGGAATT | TGCTGAAGAA | CAAATCTGA  | ATTTACCTAA | ACAACAGATA |
| 2b_Thai      | GAAGCTCAAA  | AACGGGAATT | TGCTGAAGAA | CAAATCTGA  | ATTTACCTAA | ACAACAGATA |
| Conservation | *****       | *****      | *****      | *****      | *****      | *****      |
|              |             |            |            |            |            |            |
|              | .... ....   | .... ....  | .... ....  | .... ....  | .... ....  | .... ....  |
|              | 8105        | 8115       | 8125       | 8135       | 8145       | 8155       |
| 2b_SalI      | CATTCAGATG  | AGGGCAACAA | TAATGATATG | AGCACTACAG | ATAGTGCAAA | TGAAGAGAAA |
| 2b_Thai      | CATTCAGATG  | AGGGCAACAA | TAATGATATG | AGCACTACAG | ATAGTGCAAA | TGAAGAGAAA |
| Conservation | *****       | *****      | *****      | *****      | *****      | *****      |
|              |             |            |            |            |            |            |
|              | .... ....   | .... ....  | .... ....  | .... ....  | .... ....  | .... ....  |
|              | 8165        | 8175       | 8185       | 8195       | 8205       | 8215       |
| 2b_SalI      | CAAACCTGGAG | AGGAAGAATC | ACAACATGAG | GATCAGTCAC | AACCAAGGGG | GATACATAGT |
| 2b_Thai      | CAAACCTGGAG | AGGAAGAATC | ACAACATGAG | GATCAGTCAC | AACCAAGGGG | GATACATAGT |
| Conservation | *****       | *****      | *****      | *****      | *****      | *****      |
|              |             |            |            |            |            |            |
|              | .... ....   | .... ....  | .... ....  | .... ....  | .... ....  | .... ....  |
|              | 8225        | 8235       | 8245       | 8255       | 8265       | 8275       |
| 2b_SalI      | CGAGTTCGCC  | TTGCAGAAGG | AATTATTTTG | GGATTATCTG | TCTTTTCAGG | TATTATTTTT |
| 2b_Thai      | CGAGTTCGCC  | TTGCAGAAGG | AATTATTTTG | GGATTATCTG | TCTTTTCAGG | TATTATTTTT |
| Conservation | *****       | *****      | *****      | *****      | *****      | *****      |
|              |             |            |            |            |            |            |
|              | .... ....   | .... ....  | .... ....  | .... ....  | .... ....  | .... ....  |
|              | 8285        | 8295       | 8305       | 8315       | 8325       | 8335       |
| 2b_SalI      | ATCTCATTCA  | GGCATAAGGA | TGAGGAAAAG | AAAGACCCTG | AATCCGTCGG | GGACAATTTT |
| 2b_Thai      | ATCTCATTCA  | GGCATAAGGA | TGAGGAAAAG | AAAGACCCTG | AATCCGTCGG | GGACAATTTT |
| Conservation | *****       | *****      | *****      | *****      | *****      | *****      |
|              |             |            |            |            |            |            |
|              | .... ....   | .... ....  | .... ....  | .... ....  | .... ....  | .... ....  |
|              | 8345        | 8355       | 8365       | 8375       | 8385       | 8395       |
| 2b_SalI      | GAAGGTAATA  | ACAATTTTAA | TGAAGACGAT | AAGGAAGAAG | TCATAGACGT | TTGCTTCGAC |
| 2b_Thai      | GAAGGTAATA  | ACAATTTTAA | TGAAGACGAT | AAGGAAGAAG | TCATAGACGT | TTGCTTCGAC |
| Conservation | *****       | *****      | *****      | *****      | *****      | *****      |

```
      ....|....| ....|....| .
      8405      8415
2b_SalI  AATAGCGATT ATTCTGAATA G
2b_Thai  AATAGCGATT ATTCTGAATA G
Conservation ***** *

```

**Alignment: Pvrpb2c**

```

      ....|.....| ....|.....| ....|.....| ....|.....| ....|.....|
      5          15         25         35         45         55
2c_SalI  ATGGAAAAAA ATGTTCTTTG GGTAATCTTT TACAATTTCC TAGTTATTCT TTTGGCATCA
2c_Thai  ATGGAAAAAA ATGTTCTTTG GGTAATCTTT TACAATTTCC TAGTTATTCT TTTGGCATCA
Conservation *****
      ....|.....| ....|.....| ....|.....| ....|.....| ....|.....|
      65         75         85         95        105        115
2c_SalI  TGTAAGATT  CTAATAGGAG CAAATCTAAC AGTCTAAAAA GTGAAAGTAA GTCGTTACCG
2c_Thai  TGTAATGATT CTAATCGGAG CAAATCTAAC AGTCTAAAAA GTGAAAGTAA GTCGTTACCG
Conservation *****
      ....|.....| ....|.....| ....|.....| ....|.....| ....|.....|
      125        135        145        155        165        175
2c_SalI  ACATATGCTA ATTTAATGAG GAATGGTCAA CACAAATACA ACAATGCTAA AACGGAAGAT
2c_Thai  ACATATGCTA ATTTAATGAG GAATGGTCAA GACAAATACA ACAATGCTAA AACGGAAGAT
Conservation *****
      ....|.....| ....|.....| ....|.....| ....|.....| ....|.....|
      185        195        205        215        225        235
2c_SalI  AATATAGGTA ATCAGATCAA CAATGATAAC AACATAATG GGTATAATGA TAACAGAACT
2c_Thai  AATATAGGTA ATCAGATCAA CAATGACAAC AACATAACG GATATAATGA TAACAGAATT
Conservation *****
      ....|.....| ....|.....| ....|.....| ....|.....| ....|.....|
      245        255        265        275        285        295
2c_SalI  AATAGTGAAT ATCCAAAAAC ATCACATCTA CAGCATAGCC CGTCTCTGGT ACATTTAAAT
2c_Thai  AATAGTGAAT ATCCAAAAAC ATCACATCTA CAGCATAGTC CGTCTTTGGT ACATTTAAAT
Conservation *****
      ....|.....| ....|.....| ....|.....| ....|.....| ....|.....|
      305        315        325        335        345        355
2c_SalI  GATCATAAAT TCACGGCAAA ACCATCTCGA CATGCTTACA TACAAAGAAA CAGCATATAT
2c_Thai  GATCATAAAT TTACGACAAA ACCATCTCGA CATTCTTACG TACAAAGAAA CAGCATATAT
Conservation *****
      ....|.....| ....|.....| ....|.....| ....|.....| ....|.....|
      365        375        385        395        405        415
2c_SalI  ACACTTAACA CAAATAATAA TATGAAAAAT ACAAATAACG AATCGCATAC GGTTCCAAAT
2c_Thai  AAACGTACA  CAAATAATAA TATGAAAAAT ACAAATAACG AATTGCATGT TGTTCAAAT
Conservation ***
      ....|.....| ....|.....| ....|.....| ....|.....| ....|.....|
      425        435        445        455        465        475
2c_SalI  TTATTTATTC AAAAAAATCA AAAAGCCCC CAAAAGCCAG CTACCCAAAA AAAGCCAACG
2c_Thai  TTTTTTATTC AAGAAAAAAA AGCAGCCCC CAAAAGCCAT CTGTCCAAAA TACACCAACG
Conservation **:*****
      ....|.....| ....|.....| ....|.....| ....|.....| ....|.....|
      485        495        505        515        525        535
2c_SalI  GTCCAAAAAA AAACAGAGGC CCCTGAAATT GTATATGGTA ATTTGGACTA CCTTAATACC
2c_Thai  -----GC CACTCAAATT GTATATAATA ATTTGGACTA CCTCAATGCC
Conservation **
      ....|.....| ....|.....| ....|.....| ....|.....| ....|.....|
      545        555        565        575        585        595
2c_SalI  TTCGATGACA CTAATAATAT AATTTCTGCG TTAAACCTC ACCACCCAAT TATATATTAC
2c_Thai  TTCGATGACA CTAATAATAT AATTTCTGCG TTAAACCTC ACCACCCAAT TATATATTAC
Conservation *****

```

```

      ....|....| ....|....| ....|....| ....|....| ....|....|
      605      615      625      635      645      655
2c_SalI  TTCAAGGAAA TGGAACATTT TGCAAAATAGT TACTATGACC TGAGGAGTAA AATTAGGGAT
2c_Thai  TTCAAGGAAT TGGAACATTT TGCAAAATAGT TACTATGACC TGAGGAGTAA AATTAAGGAT
Conservation *****: ***** ***** ***** ***** *****

```

```

      ....|....| ....|....| ....|....| ....|....| ....|....|
      665      675      685      695      705      715
2c_SalI  TATTTTGCTC TTCCGATGAA ACAGGCTTTC GATGTCGTAG AGCAAAATGT AAAAGACTGT
2c_Thai  TATTTTGCTC TTCCGATGAA ACAGGCTTCC GATGTGGTAG AAAAAAATGT AAAAGACTGT
Conservation ***** ***** ***** * ***** * * . ***** *****

```

```

      ....|....| ....|....| ....|....| ....|....| ....|....|
      725      735      745      755      765      775
2c_SalI  TTGAAGAACA TAAATGAATT GAGAACATTA ATGACTCAGT TAGAAAATCC CCAAAACTAT
2c_Thai  TTGCAGAACA TAAATGAATC GAGAATATTA ATGACTCAGT TAGAAAATCC CCAAAACTAT
Conservation ***.***** ***** ***** ***** ***** *****

```

```

      ....|....| ....|....| ....|....| ....|....| ....|....|
      785      795      805      815      825      835
2c_SalI  AATGATATAA GTAATCAATA TGCTGAAAAA GTAAAAGAAT ACAAAAAGGA AATTGAGGAT
2c_Thai  AATGATATAA GTGATAAATA TGATGAAAAA GTAAAAGAAT ACAAAAAGAA AATTGAGGAT
Conservation ***** **.*.*** **.* ***** ***** ***** * *****

```

```

      ....|....| ....|....| ....|....| ....|....| ....|....|
      845      855      865      875      885      895
2c_SalI  ATGCAAAATT GTTTAAAAGA CAATTATAAA CAAAATTTTA AAGCTATCTT ATCTGCAAAA
2c_Thai  ATGCAAAATT GTTTAAAAGA CAGTTATATA AAAAAATTTTA AAGCTATCAT GTCTGCAAAAT
Conservation *****.* ***** **.* ***** .***** *****:* .*****:

```

```

      ....|....| ....|....| ....|....| ....|....| ....|....|
      905      915      925      935      945      955
2c_SalI  TTAAAAATGA ACCTCGCTTT AAAAGATATA TATGCTAGCT GGTGGTCCCA ATTAAGTTCG
2c_Thai  TTAAAAATGA ATCTAGCTTT AAACGGAATA TATATCCACT GGTGGTACCT AACATGTTTCG
Conservation ***** * *.***** **.*.*** **.*.*** *****.* *.*.*****

```

```

      ....|....| ....|....| ....|....| ....|....| ....|....|
      965      975      985      995      1005      1015
2c_SalI  ACGGATACTT ACTATGATAT GGTAAAAGA TATGTATTAG AAGTTAACAA ATTTGATAAA
2c_Thai  ACGAAACTT ACGATGATAT AGTTAAAGAA TATGCAATAG AGATTAACGA TTTTGATGAA
Conservation ***.*.*** **.* ***** .*****.* *****.* *.*.*****

```

```

      ....|....| ....|....| ....|....| ....|....| ....|....|
      1025      1035      1045      1055      1065      1075
2c_SalI  AACACATCAA CTTCCTTTAT GGATCATATA AAGAAAATAC ATAATTCTGC TATTGATACA
2c_Thai  AAAAAATCGA TTTCTTTTAT GGATAATATG AAGAAAATAC ATAAGTCTGC TATTGATACA
Conservation **.*.***.* .*** ***** *****.* ***** ***** *****

```

```

      ....|....| ....|....| ....|....| ....|....| ....|....|
      1085      1095      1105      1115      1125      1135
2c_SalI  ATGAAGAAAA TGAAAGAAGA ATTAAATACA AGTCTGGATT CTGACAGAGT AGAATTTATA
2c_Thai  TTGAAGAAAA TGAAAGCAGA ATTAAATACA AGTCTGGATT CTAAAAGAAC AGAATTTATA
Conservation .***** *****.* ***** ***** ***** *.*.***. *****

```

```

      ....|....| ....|....| ....|....| ....|....| ....|....|
      1145      1155      1165      1175      1185      1195
2c_SalI  ATAGAAGAAA TTGGACATAT GGTAGAAAAG TTTAATCTTC ACTTGTCTAA AATGCGTTAT
2c_Thai  ATAGGAGAAA TTGGACATAT GATAGAAAAG TTTAATCTTC ATTTGACTAA AATTCGTTAT
Conservation ****.* ***** *.* ***** ***** *.*.*** *****

```

|              |            |            |            |            |            |            |
|--------------|------------|------------|------------|------------|------------|------------|
|              | .... ....  | .... ....  | .... ....  | .... ....  | .... ....  | .... ....  |
|              | 1205       | 1215       | 1225       | 1235       | 1245       | 1255       |
| 2c_SalI      | GGAGCTGATT | ATATCAAAAA | TATTGATTCA | CAAAGATAG  | AAAGTTACGT | TTATCAAGTT |
| 2c_Thai      | GCATCTGCTT | TTATCAAAAG | TATTCTTTTA | CAAAGGTAG  | AAAGTGACAT | TTATCGAGTT |
| Conservation | *.*.*.*.*  | .*****.    | ***..**.*  | *****.*    | ***** **.* | *****.**** |
|              | .... ....  | .... ....  | .... ....  | .... ....  | .... ....  | .... ....  |
|              | 1265       | 1275       | 1285       | 1295       | 1305       | 1315       |
| 2c_SalI      | GAACTAAGAA | CTCTTTTTTA | TGTGGCAGCT | AAACACTACG | CTGATTTTAA | GTTTAGTTTG |
| 2c_Thai      | GAACTAAAAA | CTCTTTTTTA | TGTGGCAGCT | AAACACTACG | CTGATTTTAA | ATTTAGTTTG |
| Conservation | *****.*    | *****.     | *****.     | *****.     | *****.     | *****.     |
|              | .... ....  | .... ....  | .... ....  | .... ....  | .... ....  | .... ....  |
|              | 1325       | 1335       | 1345       | 1355       | 1365       | 1375       |
| 2c_SalI      | GAACATTTAA | AAATGTTTGA | AAATTTATCC | AAAAGCAAAG | AAAAAATGCT | TTATAGCACT |
| 2c_Thai      | GAACATTTAA | AAATGTTTGA | AAATTTATCC | AAAAGCAAAG | AAAAAATGCT | TTATAGCACT |
| Conservation | *****.     | *****.     | *****.     | *****.     | *****.     | *****.     |
|              | .... ....  | .... ....  | .... ....  | .... ....  | .... ....  | .... ....  |
|              | 1385       | 1395       | 1405       | 1415       | 1425       | 1435       |
| 2c_SalI      | TTTGAAAAAT | TAGAGGTGA  | TTTACTAAAT | AAAAATAACA | CCCTTATGGG | TTCTGAACAG |
| 2c_Thai      | TTTGAAAAAT | TAGAGGTGA  | TTTACTAAAT | AAAAATAACA | CCCTTATGGG | TTCTGAACAG |
| Conservation | *****.     | *****.     | *****.     | *****.     | *****.     | *****.     |
|              | .... ....  | .... ....  | .... ....  | .... ....  | .... ....  | .... ....  |
|              | 1445       | 1455       | 1465       | 1475       | 1485       | 1495       |
| 2c_SalI      | TCTACCTCTG | ATCTTACCTC | TATTATTGCG | GATTCTGAAA | AAATCATAAA | ATCTGCAGAA |
| 2c_Thai      | TCTACCTCTG | ATCTTACCTC | TATTATTGCG | GATTCTGAAA | AAATCATAAA | ATCTGCAGAA |
| Conservation | *****.     | *****.     | *****.     | *****.     | *****.     | *****.     |
|              | .... ....  | .... ....  | .... ....  | .... ....  | .... ....  | .... ....  |
|              | 1505       | 1515       | 1525       | 1535       | 1545       | 1555       |
| 2c_SalI      | TCATTAATTA | ATTCGAGTTC | TGAAGAGATA | GCAAAATATG | CACTTGATTC | AAATGAGAAA |
| 2c_Thai      | TCATTAATTA | ATTCGAGTTC | TGAAGAGATA | GCAAAATATG | CACTTGATTC | AAATGAGAAA |
| Conservation | *****.     | *****.     | *****.     | *****.     | *****.     | *****.     |
|              | .... ....  | .... ....  | .... ....  | .... ....  | .... ....  | .... ....  |
|              | 1565       | 1575       | 1585       | 1595       | 1605       | 1615       |
| 2c_SalI      | ATTAATGAGA | TAAAAAATA  | TTATGACCAA | AAGATACTCA | GTGTAAAAGA | ATTTATAAAT |
| 2c_Thai      | ATTAATGAGA | TAAAAAATA  | TTATGACCAA | AAGATACTCA | GTGTAAAAGA | ATTTATAAAT |
| Conservation | *****.     | *****.     | *****.     | *****.     | *****.     | *****.     |
|              | .... ....  | .... ....  | .... ....  | .... ....  | .... ....  | .... ....  |
|              | 1625       | 1635       | 1645       | 1655       | 1665       | 1675       |
| 2c_SalI      | AAATCAAATG | GGTTAATTAC | AACTGTAAAA | GGTACATCTA | AACTAAGTGA | ATCAGATAAG |
| 2c_Thai      | AAATCAAATG | GGTTAATTAC | AACTGTAAAA | GGTACATCTA | AACTAAGTGA | ATCAGATAAG |
| Conservation | *****.     | *****.     | *****.     | *****.     | *****.     | *****.     |
|              | .... ....  | .... ....  | .... ....  | .... ....  | .... ....  | .... ....  |
|              | 1685       | 1695       | 1705       | 1715       | 1725       | 1735       |
| 2c_SalI      | AAACAGATAG | ATAAAAAAAT | AGAGAAAGTA | AAAAAAAATA | CAAACACTCT | AGAGAGGGGA |
| 2c_Thai      | AAACAGATAG | ATAAAAAAAT | AGAGAAAGTA | AAAAAAAATA | CAAACACTCT | AGAGAGGGGA |
| Conservation | *****.     | *****.     | *****.     | *****.     | *****.     | *****.     |
|              | .... ....  | .... ....  | .... ....  | .... ....  | .... ....  | .... ....  |
|              | 1745       | 1755       | 1765       | 1775       | 1785       | 1795       |
| 2c_SalI      | AATGAGTTTA | TAAAAATAAT | GAATGAAGTA | AAAACAAAAA | TAAGCAATTC | TTCTAATAGC |
| 2c_Thai      | AATGAGTTTA | TAAAAATAAT | GAATGAAGTA | AAAACAAAAA | TAAGCAATTC | TTCTAATAGC |
| Conservation | *****.     | *****.     | *****.     | *****.     | *****.     | *****.     |

|              |            |             |            |             |             |             |
|--------------|------------|-------------|------------|-------------|-------------|-------------|
|              | .... ....  | .... ....   | .... ....  | .... ....   | .... ....   | .... ....   |
|              | 1805       | 1815        | 1825       | 1835        | 1845        | 1855        |
| 2c_SalI      | GCTACAAATT | CAAAGGATTT  | TTCTCATAAA | TTGAAAGAAT  | TACAAACTGA  | ATTTGAAGGG  |
| 2c_Thai      | GCTACAAATT | CAAAGGCATT  | TTCTGATAAA | TTGAAAGAAT  | TACAAACTGA  | ATTTGAAGGA  |
| Conservation | *****      | *****..*    | **** ***** | *****       | *****       | *****.      |
|              | .... ....  | .... ....   | .... ....  | .... ....   | .... ....   | .... ....   |
|              | 1865       | 1875        | 1885       | 1895        | 1905        | 1915        |
| 2c_SalI      | TTAAATAAAA | CTATCGAAGA  | CGATTTGCAA | AAAATAAAAAG | ACATAAAAAGT | AAAGGAAGAT  |
| 2c_Thai      | TTAAATAAAA | CTATCGAAGA  | CGATTTGCAA | AAAATAAATG  | AGATAAAAAAT | AAAAGAAAAAT |
| Conservation | *****      | *****       | *****      | *****:*     | * *****.*   | ***.***.*   |
|              | .... ....  | .... ....   | .... ....  | .... ....   | .... ....   | .... ....   |
|              | 1925       | 1935        | 1945       | 1955        | 1965        | 1975        |
| 2c_SalI      | GAGGATCGTT | CTATGAAAAA  | TCAAATAGAA | GAACATTTGA  | AATATGCGTC  | TGATAACAGT  |
| 2c_Thai      | GAGGATCGTT | CTATGAAAAGA | TCAAATAGAA | CAACATCTGA  | AAGATGCGTC  | TGATAACAGT  |
| Conservation | *****      | *****.*     | *****      | .*****.*    | **.******   | *****       |
|              | .... ....  | .... ....   | .... ....  | .... ....   | .... ....   | .... ....   |
|              | 1985       | 1995        | 2005       | 2015        | 2025        | 2035        |
| 2c_SalI      | GACAAAGTAA | AAAAGTTAAT  | TTCCAAAAAT | AATGAAATAC  | AAAATTATAT  | TCAGAAAATC  |
| 2c_Thai      | GAAAAAGTAA | AAAGGTTAAT  | TTCCAAAAAT | AATGAAATAC  | AAAAATATAT  | TCAGATAATT  |
| Conservation | **.******  | ***.******  | *****      | *****       | ****:****** | *****:***   |
|              | .... ....  | .... ....   | .... ....  | .... ....   | .... ....   | .... ....   |
|              | 2045       | 2055        | 2065       | 2075        | 2085        | 2095        |
| 2c_SalI      | GAAATTTGA  | TTAAAGACGC  | ACCTTCTGGA | AAAGAAAAAT  | TTACAACCTCA | GAAAACAGAT  |
| 2c_Thai      | GAAATTTGA  | TTAAAGATGC  | ACCTTCTGGC | AAAGACAAAT  | TTACATCTGA  | GAAAACAGAT  |
| Conservation | *****      | ***** **    | *****.     | *****.*     | *****.*.*   | *****       |
|              | .... ....  | .... ....   | .... ....  | .... ....   | .... ....   | .... ....   |
|              | 2105       | 2115        | 2125       | 2135        | 2145        | 2155        |
| 2c_SalI      | TTGCAAAACA | AGGTAAAGAC  | AATAATCGAT | GAGTTTCATA  | AGGAAGATTT  | ACAATTATTA  |
| 2c_Thai      | TTGCAAAACA | AGGTAAAGGA  | AATAATCAAT | GAGTTTCATA  | CGGGAGATTT  | ACAATTATTA  |
| Conservation | *****      | *****..     | *****.*    | *****       | ***.******  | *****       |
|              | .... ....  | .... ....   | .... ....  | .... ....   | .... ....   | .... ....   |
|              | 2165       | 2175        | 2185       | 2195        | 2205        | 2215        |
| 2c_SalI      | TTAAATAGTT | TATCAACATT  | TTACGAGGAA | CACCAAAAAGT | TATACAGAGA  | AGCAAGTACT  |
| 2c_Thai      | TTAAATAGTT | TATCAACATT  | TTACGAGAAA | CACCAAAAAGT | TATACAGCGG  | AGCAAGTACT  |
| Conservation | *****      | *****       | *****.*    | *****       | *****.*.    | *****       |
|              | .... ....  | .... ....   | .... ....  | .... ....   | .... ....   | .... ....   |
|              | 2225       | 2235        | 2245       | 2255        | 2265        | 2275        |
| 2c_SalI      | ATAGAAAACA | TTAAAGAGTT  | GCACCCAAAA | ATAAAAAGAAG | AATATGAAAA  | ACTTGAAAAA  |
| 2c_Thai      | ATAGAAAACA | TTAAAGAGTT  | GCACCCAAAA | ATAAAAAGAAG | AATATGAAAA  | ACTTGAAAAA  |
| Conservation | *****      | *****       | *****      | *****       | *****       | *****       |
|              | .... ....  | .... ....   | .... ....  | .... ....   | .... ....   | .... ....   |
|              | 2285       | 2295        | 2305       | 2315        | 2325        | 2335        |
| 2c_SalI      | AAGAATTATA | GTAATATTGA  | TCAAACATTA | CATAATTTGG  | ATGCAGAACT  | AGATAAAGT   |
| 2c_Thai      | AAGAATTATA | GTAATATTGA  | TCAAACATTA | CATAATTTGG  | ATGCAGAACT  | AGATAAAGT   |
| Conservation | *****      | *****       | *****      | *****       | *****       | *****       |
|              | .... ....  | .... ....   | .... ....  | .... ....   | .... ....   | .... ....   |
|              | 2345       | 2355        | 2365       | 2375        | 2385        | 2395        |
| 2c_SalI      | AAAGCTCTAG | AGAAAAATAT  | TGTAGAAGAG | CAAACCTAATA | ATATCAATAA  | AGATATGACA  |
| 2c_Thai      | AAAGCTCTAG | AGAAAAATAT  | TGTAGAAGAG | CAAACCTAATA | ATATCAATAA  | AGATATGACA  |
| Conservation | *****      | *****       | *****      | *****       | *****       | *****       |

|              |             |            |            |            |             |            |
|--------------|-------------|------------|------------|------------|-------------|------------|
|              | .... ....   | .... ....  | .... ....  | .... ....  | .... ....   | .... ....  |
|              | 2405        | 2415       | 2425       | 2435       | 2445        | 2455       |
| 2c_SalI      | GATTTCGTTGA | ATAAGTTAAC | TGCTGAAGTC | AACAGTTTGA | GAAGTGCCTT  | GGATAGCTAT |
| 2c_Thai      | GATTTCGTTGA | CTAAGTTAAA | TACCGAAGTC | GACAGTTTGA | GAAATGCCTT  | GGATGGCTAT |
| Conservation | *****       | .*****.    | *.******   | .*****     | ***.*****   | ***.*****  |
|              | .... ....   | .... ....  | .... ....  | .... ....  | .... ....   | .... ....  |
|              | 2465        | 2475       | 2485       | 2495       | 2505        | 2515       |
| 2c_SalI      | AAGGCGGATG  | AAGGTCATCT | CAAAACCTAT | AAAAACCAA  | TAAATGAGAG  | GAAAGAGAAA |
| 2c_Thai      | AAGGCGGATG  | AAAGTGAGCT | CAAAACCTAT | AAAAACCGAA | TGAATGAAAG  | GAAAGAAAA  |
| Conservation | *****       | **.* * **  | *****      | *****.*    | *.*****.*   | *****.***: |
|              | .... ....   | .... ....  | .... ....  | .... ....  | .... ....   | .... ....  |
|              | 2525        | 2535       | 2545       | 2555       | 2565        | 2575       |
| 2c_SalI      | TTTCTCAGTA  | CTTTAAAGGA | ACAAGAGGAT | GATATTCCAG | ATGGAAAAAA  | TATTTATGAA |
| 2c_Thai      | TTTATCAGTA  | CTTTAAAGGA | ACAAGAGGAT | GATATTCCAG | ATGGAAAAAA  | TATTTATGAA |
| Conservation | ***.*****   | *****      | *****      | *****      | *****       | *****      |
|              | .... ....   | .... ....  | .... ....  | .... ....  | .... ....   | .... ....  |
|              | 2585        | 2595       | 2605       | 2615       | 2625        | 2635       |
| 2c_SalI      | GAGTATAATA  | AACATAAAGG | TGTTATGGAT | AACAAAGAAC | AAAAATAAC   | CAGTGATATA |
| 2c_Thai      | GAGTGTATA   | AACATAAAGG | TGTTATGGAT | AACAAAGAAC | ATAAATAAC   | TAGTGATATA |
| Conservation | ***.*****   | *****      | *****      | *****      | *:*****     | *****      |
|              | .... ....   | .... ....  | .... ....  | .... ....  | .... ....   | .... ....  |
|              | 2645        | 2655       | 2665       | 2675       | 2685        | 2695       |
| 2c_SalI      | AATCAATGCA  | GAGAAAATAT | TAAAAATGCT | GAAAAAATA  | GAGAGAAATT  | CAATACTCTA |
| 2c_Thai      | AATCAATGCA  | AAGAAAATAT | TGTAATGCC  | GAAAAAATA  | TAGAGACATT  | CAATACTCTA |
| Conservation | *****       | .*****     | *.:*****   | *****      | *****.*     | *****      |
|              | .... ....   | .... ....  | .... ....  | .... ....  | .... ....   | .... ....  |
|              | 2705        | 2715       | 2725       | 2735       | 2745        | 2755       |
| 2c_SalI      | GTGCAAACAT  | TAGAAGCACA | CACAGGAGAA | AAAGATCCGA | ACGTTTCATGA | TTCATTGGAA |
| 2c_Thai      | GTGAAAACAT  | TAGAAGCACA | CACAGGTA   | ACATATCCAG | ACGCTCATA   | TTCATTGCAA |
| Conservation | ***.*****   | *****      | *****:.*   | *.* *****. | ***.*****.  | *****.*    |
|              | .... ....   | .... ....  | .... ....  | .... ....  | .... ....   | .... ....  |
|              | 2765        | 2775       | 2785       | 2795       | 2805        | 2815       |
| 2c_SalI      | AAGTTTAAAG  | CTAATCTTGA | AAATTTAAAT | TTGAGTAAAC | TAGAAACTGA  | ATTTAAATCT |
| 2c_Thai      | AAGCTTAAAG  | GTAATCTAGA | AAATTTAAAT | TTGAGTGAAC | TCGAAATGA   | ATTTAAATCT |
| Conservation | *** ***.*   | .*****.*   | *****      | *****.*    | *.*****.*   | *****      |
|              | .... ....   | .... ....  | .... ....  | .... ....  | .... ....   | .... ....  |
|              | 2825        | 2835       | 2845       | 2855       | 2865        | 2875       |
| 2c_SalI      | CTCATCGATT  | CAGCTAGTAC | AACCAATAAA | CAGATTGAAA | ATATAATAAA  | AAATATAGAC |
| 2c_Thai      | CTCTTCGATT  | CAGCTAGTAC | AACCAATAAA | CAGATTGAAA | ATATAAGAAA  | AAATATAGAC |
| Conservation | ***.*****   | *****      | *****      | *****      | ***** **    | *****      |
|              | .... ....   | .... ....  | .... ....  | .... ....  | .... ....   | .... ....  |
|              | 2885        | 2895       | 2905       | 2915       | 2925        | 2935       |
| 2c_SalI      | ACAATTAAT   | CATTAAATTT | TACGAAAAAT | AGTTCGGACA | GCAGCAAATT  | GTCATTGGAA |
| 2c_Thai      | ACAATTAAT   | CATTAAATTT | TACGAAAAAT | AGTTCGGACA | GCAGCAAATT  | GTCATTGGAA |
| Conservation | *****       | *****      | *****      | *****      | *****       | *****      |
|              | .... ....   | .... ....  | .... ....  | .... ....  | .... ....   | .... ....  |
|              | 2945        | 2955       | 2965       | 2975       | 2985        | 2995       |
| 2c_SalI      | AAGATAAAG   | AAAATAAAGC | AGATTTAATA | AAAAAACTAG | AACAACACAC  | TCAAGAAATA |
| 2c_Thai      | AAGATAAAG   | AAAATAAAGC | AGATTTAATA | AAAAAACTAG | AACAACACAC  | TCAAGAAATA |
| Conservation | *****       | *****      | *****      | *****      | *****       | *****      |

|              |            |             |             |            |             |             |
|--------------|------------|-------------|-------------|------------|-------------|-------------|
|              | .... ....  | .... ....   | .... ....   | .... ....  | .... ....   | .... ....   |
|              | 3005       | 3015        | 3025        | 3035       | 3045        | 3055        |
| 2c_SalI      | GAAAAATACA | CATTCATAGA  | AAAAGAAGAA  | ACGTTACCCC | TTTTAAGCGA  | TTTACGAGAA  |
| 2c_Thai      | GAAAAATACA | CATTCATAGA  | AAAAGAAGAA  | ACGTCACCCC | TTTTAAGCGA  | TTTACGAGAA  |
| Conservation | *****      | *****       | *****       | **** *     | *****       | *****       |
|              |            |             |             |            |             |             |
|              | .... ....  | .... ....   | .... ....   | .... ....  | .... ....   | .... ....   |
|              | 3065       | 3075        | 3085        | 3095       | 3105        | 3115        |
| 2c_SalI      | GAAAAAAACC | GCGTACAGCG  | TGACATGTCT  | GAAGAATTGA | TAAGCCAATT  | AAACACAAAA  |
| 2c_Thai      | GAAAAAAACC | GCGTACAGCG  | TGACATGTCT  | GAAGAGTTGA | TAAACCAGTT  | AAACACAAAA  |
| Conservation | *****      | *****       | *****       | *****      | ***.***.*** | *****       |
|              |            |             |             |            |             |             |
|              | .... ....  | .... ....   | .... ....   | .... ....  | .... ....   | .... ....   |
|              | 3125       | 3135        | 3145        | 3155       | 3165        | 3175        |
| 2c_SalI      | ATTAATGCTA | TATTAGAATA  | TTACGATAAA  | TCAAAGGATA | GTTTCAATGG  | GGATGATGAA  |
| 2c_Thai      | ATTAATGATA | TACTGGAATA  | TTACGATAAA  | TCAAAGGATA | GTTTCAATGG  | GGATGATGAA  |
| Conservation | *****.*    | ** * .***** | *****       | *****      | *****       | *****       |
|              |            |             |             |            |             |             |
|              | .... ....  | .... ....   | .... ....   | .... ....  | .... ....   | .... ....   |
|              | 3185       | 3195        | 3205        | 3215       | 3225        | 3235        |
| 2c_SalI      | ACAAAATTGG | AACAATTAGA  | TGAGTTTAAA  | AAAGAGTGTC | AATACGTTCA  | ACAAGAAATA  |
| 2c_Thai      | AAAAAATTGG | AACAATTAGA  | TGACTTTAAA  | AGAAAGTGCC | AAGATGTTCA  | ACAAGGAATA  |
| Conservation | *.*****    | *****       | *** *****   | *.*** **   | ** * *****  | *****.***   |
|              |            |             |             |            |             |             |
|              | .... ....  | .... ....   | .... ....   | .... ....  | .... ....   | .... ....   |
|              | 3245       | 3255        | 3265        | 3275       | 3285        | 3295        |
| 2c_SalI      | GAAAAGTTAA | CAACTAACTA  | TAAAGTTTAA  | GAAAATAAGA | TAAATGACAT  | AATTAACGAA  |
| 2c_Thai      | GAAAAGTTAA | CAACTAACTA  | TAAAGTATTA  | GAAAATAGGA | TAAATGACAT  | AATTAATAAAA |
| Conservation | *****      | *****       | *****.***   | *****.*    | *****       | *****.*     |
|              |            |             |             |            |             |             |
|              | .... ....  | .... ....   | .... ....   | .... ....  | .... ....   | .... ....   |
|              | 3305       | 3315        | 3325        | 3335       | 3345        | 3355        |
| 2c_SalI      | CAACATGAAA | AAGTTATAAC  | ACTGAGTGAA  | AATCATATAA | CAGGGAAAGA  | CAAAAAGATA  |
| 2c_Thai      | CAACATGAGA | AAGTTATAAC  | AATGACTGAA  | AATCATATAA | CAGGGAAAGA  | CAAAAAGATA  |
| Conservation | *****.*    | *****       | *.*** **    | *****      | *****       | *****       |
|              |            |             |             |            |             |             |
|              | .... ....  | .... ....   | .... ....   | .... ....  | .... ....   | .... ....   |
|              | 3365       | 3375        | 3385        | 3395       | 3405        | 3415        |
| 2c_SalI      | AATGAAAAGA | TTCAACAAAA  | TATAAATTCG  | CTAAATGATA | TGAAAACGAA  | ATTGGGTTTA  |
| 2c_Thai      | AATGAAAAGA | TTCAACAAAA  | TGTA AATTCG | CTAAATGAAA | TGAAAGCGAA  | ATTGGGTTTA  |
| Conservation | *****      | *****       | *.*****     | *****.*    | *****.***   | *****       |
|              |            |             |             |            |             |             |
|              | .... ....  | .... ....   | .... ....   | .... ....  | .... ....   | .... ....   |
|              | 3425       | 3435        | 3445        | 3455       | 3465        | 3475        |
| 2c_SalI      | CTCGAAATTA | ACCAAGATAT  | CAAAAATAGC  | AAAGATGCTA | CAATTAAAAA  | TAAAATACAG  |
| 2c_Thai      | CTCGAAATTA | ACGAAGATAT  | CAAAAATAGC  | AAAGATGTTA | CAATTAAAAA  | TAAAATACAG  |
| Conservation | *****      | ** .*****   | *****       | *****.*    | *****       | *****       |
|              |            |             |             |            |             |             |
|              | .... ....  | .... ....   | .... ....   | .... ....  | .... ....   | .... ....   |
|              | 3485       | 3495        | 3505        | 3515       | 3525        | 3535        |
| 2c_SalI      | GAATTTGAAA | ACAAAGTTAA  | AACTATACTT  | GGAAATATAG | ATAAAGCTAA  | TAATAAAATA  |
| 2c_Thai      | GAATTTGAAA | ACAAAGTTAA  | AACTATACTT  | GGAAATATAG | GTAATGCTAA  | TAATAAAATA  |
| Conservation | *****      | *****       | *****       | *****      | .***:*****  | *****       |
|              |            |             |             |            |             |             |
|              | .... ....  | .... ....   | .... ....   | .... ....  | .... ....   | .... ....   |
|              | 3545       | 3555        | 3565        | 3575       | 3585        | 3595        |
| 2c_SalI      | GATGAAATTA | AAAGAGTGCA  | CGTTGAGAAT  | AAAGTTGCAT | TCGATAAAGA  | AAAAGTTGAA  |
| 2c_Thai      | GATGCAATTA | AAAGAGTGCA  | TGATGCGAAT  | AAAGTTGAAT | TCGATAGAGA  | AAAAGTTAAA  |
| Conservation | ****.***** | *****       | *.***.***   | *****.*    | *****.***   | *****.*     |



|              |            |            |            |             |            |            |
|--------------|------------|------------|------------|-------------|------------|------------|
|              | .... ....  | .... ....  | .... ....  | .... ....   | .... ....  | .... ....  |
|              | 3605       | 3615       | 3625       | 3635        | 3645       | 3655       |
| 2c_SalI      | AATACAAATT | TCGAAAAAAA | AAAGAAAAGC | ATAGAAAAAG  | TTTATGAACA | AATGGAAAAA |
| 2c_Thai      | AAAACAAGTT | TCGATGAAAA | AAAGGAAATC | ATAGGAAAAAG | TTTATCAACA | AATGGAAAAA |
| Conservation | **..***.*  | ***:.*     | ***.*      | ***.*       | ***.*      | *****      |
|              | .... ....  | .... ....  | .... ....  | .... ....   | .... ....  | .... ....  |
|              | 3665       | 3675       | 3685       | 3695        | 3705       | 3715       |
| 2c_SalI      | ACGATTAAG  | AATTAGAGGA | AATGAATGAC | GAAAGTAAAC  | TAGCAAAAAG | AGTAGAAGAA |
| 2c_Thai      | ACTCTTAAAG | AATTAGAGGA | AATGGATGAC | GAAAGTAGCA  | TAACAAAAGA | TGTAGACGTA |
| Conservation | **..*****  | *****      | ***.*      | *****.*     | **..*****  | *****.*    |
|              | .... ....  | .... ....  | .... ....  | .... ....   | .... ....  | .... ....  |
|              | 3725       | 3735       | 3745       | 3755        | 3765       | 3775       |
| 2c_SalI      | GCTCAAATAC | AATACAAAAG | AATTTTATT  | GATCATGATG  | TTAATTTGAT | GAATGATGAA |
| 2c_Thai      | GCTCAAATAC | TATACAGAAG | AATTTTATT  | AATCATGCTG  | TTAATTTGAT | GGATGATGAA |
| Conservation | *****      | *****.*    | *****      | *****.*     | *****      | *.*****    |
|              | .... ....  | .... ....  | .... ....  | .... ....   | .... ....  | .... ....  |
|              | 3785       | 3795       | 3805       | 3815        | 3825       | 3835       |
| 2c_SalI      | GTTGAAAAGT | CCAAAAGTGT | GATGGAAGAA | ATCGAATTAT  | ATAAAAAAGA | AATTGACCAA |
| 2c_Thai      | GTTGAAAAGT | CCAAAAGTGT | GATGGCAGAA | ATCGAATTAT  | ATAAAAAAGA | AATTGACGAA |
| Conservation | *****      | *****      | ***.*      | *****       | *****      | *****.*    |
|              | .... ....  | .... ....  | .... ....  | .... ....   | .... ....  | .... ....  |
|              | 3845       | 3855       | 3865       | 3875        | 3885       | 3895       |
| 2c_SalI      | ATTAAAAAGA | AAATGATTGA | GTATAATAAA | GCTGATACAT  | CTAATTTTGA | TTATACAGTA |
| 2c_Thai      | ACTAAACAGA | AAACGATTGA | ATATAAGCAA | GGTGATACAT  | CTAATTTTGA | TTATACAAA  |
| Conservation | *.***.*    | ***.*****  | *****.*    | *.*****     | *****      | *****.*    |
|              | .... ....  | .... ....  | .... ....  | .... ....   | .... ....  | .... ....  |
|              | 3905       | 3915       | 3925       | 3935        | 3945       | 3955       |
| 2c_SalI      | CCATACAACA | GTGCTACACA | GAGTAAAGCT | AAAATAGAAC  | AATTTATTAC | GAATGCTAAA |
| 2c_Thai      | GAATACAACA | ATGCTACACA | GAGTAAAGCT | AAAATAGAAA  | ATTTTATTGA | AAATGTTAAG |
| Conservation | ..*****    | *****      | *****      | *****.*     | *.*****    | *****.*    |
|              | .... ....  | .... ....  | .... ....  | .... ....   | .... ....  | .... ....  |
|              | 3965       | 3975       | 3985       | 3995        | 4005       | 4015       |
| 2c_SalI      | ACAAAAAAG  | GAACGTCTGA | CGCCAGCCAA | GATATAAAG   | AATTAGAACG | TATTAAAGAA |
| 2c_Thai      | ACAAAAAAG  | GAACGTCTGA | CACAAGCCAA | AATATAAAG   | AATTAGAAAG | TATTAAAGAA |
| Conservation | *****      | *****      | *.*.*****  | *****       | *****.*    | *****      |
|              | .... ....  | .... ....  | .... ....  | .... ....   | .... ....  | .... ....  |
|              | 4025       | 4035       | 4045       | 4055        | 4065       | 4075       |
| 2c_SalI      | GAGGTGCATA | CTAATTTACA | ACAAGTCAAA | CTAGAAAATA  | ATTCTATGGA | GGAAAAGCGA |
| 2c_Thai      | GAGGTGCATG | ATAATTTACA | ACAAGTCAAA | CTAGAAAATG  | TTTCTATGGA | GGAAATTCGA |
| Conservation | *****.*    | *****      | *****      | *****.*     | *****      | *****.*    |
|              | .... ....  | .... ....  | .... ....  | .... ....   | .... ....  | .... ....  |
|              | 4085       | 4095       | 4105       | 4115        | 4125       | 4135       |
| 2c_SalI      | AAACAAATTC | ATAATATGAA | AAATTTGCTA | ATTTTGAACA  | ATTCTGAAAC | CATAGCTAAA |
| 2c_Thai      | AAACAAATTC | TTAATATGAA | AAATTTACTA | ATTTTGAACA  | ATTCTGAAAC | CATAGCAAAA |
| Conservation | *****      | *****      | *****.*    | ***.*       | *****      | *****.*    |
|              | .... ....  | .... ....  | .... ....  | .... ....   | .... ....  | .... ....  |
|              | 4145       | 4155       | 4165       | 4175        | 4185       | 4195       |
| 2c_SalI      | GAAATATCAA | ATAATACTCA | AAACGCATTA | AATTTAGCC   | TGGATGCAAA | AAAAGAACTT |
| 2c_Thai      | GAAATATCAA | ATAATACTCA | AAACGCATTA | GGTTTATGGG  | ATAATGCAAA | AACAGAACTT |
| Conservation | *****      | *****      | *****      | ..*****     | ..*****    | *.*****    |

|              |            |             |             |             |            |             |
|--------------|------------|-------------|-------------|-------------|------------|-------------|
|              | .... ....  | .... ....   | .... ....   | .... ....   | .... ....  | .... ....   |
|              | 4205       | 4215        | 4225        | 4235        | 4245       | 4255        |
| 2c_SalI      | AAAAAACAG  | ATGAACTATT  | ACAAAGTGTG  | GAAGCTAAGA  | TAGCTGAGGC | AGAGGCACAT  |
| 2c_Thai      | AATAAACAA  | ATGAACTATT  | ACAAAGTGTG  | GAAGCTAAGA  | TAGCTGAGGC | AGAGGCACAT  |
| Conservation | **..*****. | *****.      | *****.      | *****.      | *****.     | *****.      |
|              |            |             |             |             |            |             |
|              | .... ....  | .... ....   | .... ....   | .... ....   | .... ....  | .... ....   |
|              | 4265       | 4275        | 4285        | 4295        | 4305       | 4315        |
| 2c_SalI      | AAAAAAAAA  | TTGATATAGC  | TTTAGAAGAT  | GGACAAATAG  | ATACGGAGGT | AAGCAAAATT  |
| 2c_Thai      | AAAAAAAAA  | TTGGCATAGC  | TTTAGAAGAT  | GGACAAATAG  | ACACGGAGGT | AAGCGAAATT  |
| Conservation | *****.     | ***..*****  | *****.      | *****.      | * ..*****  | ***..*****  |
|              |            |             |             |             |            |             |
|              | .... ....  | .... ....   | .... ....   | .... ....   | .... ....  | .... ....   |
|              | 4325       | 4335        | 4345        | 4355        | 4365       | 4375        |
| 2c_SalI      | GAACAAATTA | ATCAGGAAAT  | TATGAATAAG  | AGAGATGAAA  | TTAAATCCTA | TTTAAAGTGAA |
| 2c_Thai      | GAACAAATTA | AGCGAGAAAT  | TATAAATAAA  | AAAAATGAAA  | TTGAATCCTA | TTTAAATGAA  |
| Conservation | *****.     | * *..*****  | ***..*****. | *..*****    | **..*****  | *****.***   |
|              |            |             |             |             |            |             |
|              | .... ....  | .... ....   | .... ....   | .... ....   | .... ....  | .... ....   |
|              | 4385       | 4395        | 4405        | 4415        | 4425       | 4435        |
| 2c_SalI      | ATAAAAAAAT | ATAAAGAGAA  | ATGTACAACC  | GAAATCAGTA  | ATTCAAAAAG | AGGAAAAGAT  |
| 2c_Thai      | ATAAAGAAAT | ATAAAGACAA  | ATGCACAACC  | GAAATCAGTA  | ATTCAAAAAG | AGGAAAAGAT  |
| Conservation | *****.***  | ***** **    | *** *****   | *****.      | *****.     | *****.      |
|              |            |             |             |             |            |             |
|              | .... ....  | .... ....   | .... ....   | .... ....   | .... ....  | .... ....   |
|              | 4445       | 4455        | 4465        | 4475        | 4485       | 4495        |
| 2c_SalI      | AAAATTGAGT | TCTTGGAAAAT | ATTTAAGCCT  | AATGAAGATA  | GCAATCGGAA | TAAGGTTAAC  |
| 2c_Thai      | AAAATTGAGT | TCTTGGAAA   | ATTTAAGCCT  | AATGAGGAAA  | GCAATCGGAA | TAAGGTTAAC  |
| Conservation | *****.     | *****.***.  | *****.      | *****.***.* | *****.     | *****.      |
|              |            |             |             |             |            |             |
|              | .... ....  | .... ....   | .... ....   | .... ....   | .... ....  | .... ....   |
|              | 4505       | 4515        | 4525        | 4535        | 4545       | 4555        |
| 2c_SalI      | ATTAATGAAA | TAGATGGAAA  | TATAAGCAAA  | TCTGAACAAT  | ACTTAACAGA | TATAAAGGGC  |
| 2c_Thai      | ATTAATGAAA | TAAATGAAA   | TATAAGAAAT  | TCTGAACAAT  | ACTTAAAAGA | TATAGAAGAC  |
| Conservation | *****.     | **..***.*** | *****.***.  | *****.      | *****.***  | *****.***.* |
|              |            |             |             |             |            |             |
|              | .... ....  | .... ....   | .... ....   | .... ....   | .... ....  | .... ....   |
|              | 4565       | 4575        | 4585        | 4595        | 4605       | 4615        |
| 2c_SalI      | ACAGAAAAAC | AAGCTAATAC  | AAATGTAGAA  | CTATTCCATA  | ATCATGAAAC | AAATATCAGT  |
| 2c_Thai      | GCAGAAAAAC | AAGCTAGTAC  | AAAAGTAGAA  | CTATTCCATA  | AACATGAAAC | AACTATCAGT  |
| Conservation | *****.     | *****.***   | ***..*****  | *****.      | * ..*****  | **..*****   |
|              |            |             |             |             |            |             |
|              | .... ....  | .... ....   | .... ....   | .... ....   | .... ....  | .... ....   |
|              | 4625       | 4635        | 4645        | 4655        | 4665       | 4675        |
| 2c_SalI      | AATATTTTCA | AGCAATCTGA  | AATTTTAGGA  | GTAGAAACTA  | AATCAAAAAA | AAAAATTAGA  |
| 2c_Thai      | AATATTTTCA | AGGAATCTGA  | AATTTTAGGA  | GTGGAAACTA  | AATCCCAAAA | AAAAATTAAT  |
| Conservation | *****.     | ** ..*****  | *****.      | **..*****   | ***..***** | *****.***.  |
|              |            |             |             |             |            |             |
|              | .... ....  | .... ....   | .... ....   | .... ....   | .... ....  | .... ....   |
|              | 4685       | 4695        | 4705        | 4715        | 4725       | 4735        |
| 2c_SalI      | GAAGCAGATG | ACATAATGAA  | AGAAAATTGAG | GGCCACAATT  | CTGAAATTCA | AACACAGGTG  |
| 2c_Thai      | AAAGCAGAAG | ACATAATGAA  | AGAAAATTGAG | CGTCACAATT  | CTGAAATTCA | AACACAGGTG  |
| Conservation | *****.*    | *****.      | *****.      | *..*****    | *****.     | *****.      |
|              |            |             |             |             |            |             |
|              | .... ....  | .... ....   | .... ....   | .... ....   | .... ....  | .... ....   |
|              | 4745       | 4755        | 4765        | 4775        | 4785       | 4795        |
| 2c_SalI      | AAGAGTTTCC | AAGAAAATCT  | AAATAAATTG  | AACGAGCCCC  | ATAATTATGA | CAACGCAGAA  |
| 2c_Thai      | AAAGGTTTCC | AAGAAAATCT  | AAATAAATTG  | AACGAGCCCC  | ATAATTATGA | CAACGCAGAA  |
| Conservation | **..*****  | *****.      | *****.***   | *****.      | *****.     | *****.      |

```

      ....|....| ....|....| ....|....| ....|....| ....|....|
      4805      4815      4825      4835      4845      4855
2c_SalI      GATGAAC TTA ATAATGATAA ATCTACGAGT GCAAAGGTGC TTATACAGAC TAACTTAGAA
2c_Thai      GATGAAC TTA ATAATGATAA ATCTACGAAT GCAAAGGTAC TTATAGAAAC TAACCTAGAA
Conservation ***** * ***** * ***** * ***** * ***** * *****

      ....|....| ....|....| ....|....| ....|....| ....|....|
      4865      4875      4885      4895      4905      4915
2c_SalI      AGTGTA AAC ATAATTTATC CGAAAT TACT AACAT TAAAG ATGGAGGAGA AAACATATAC
2c_Thai      AGTGTA AAC ATAATTTATC AGAAAT TACT AATAT TAAAC AGGGAGGAGA AAAAATATAC
Conservation ***** * ***** * ***** * ***** * ***** * *****

      ....|....| ....|....| ....|....| ....|....| ....|....|
      4925      4935      4945      4955      4965      4975
2c_SalI      AATAAAGCTA ATGATATCAT GCAAAAAATA AAAGCAATTT CAAAAAATTC TGCAGAGAAA
2c_Thai      AGTAAAGCTA AAGATATCAT GCAAAAAATA AAAGCAACTT CAGAAAAATAC TGCAGAGAAA
Conservation * ***** * ***** * ***** * ***** * ***** * *****

      ....|....| ....|....| ....|....| ....|....| ....|....|
      4985      4995      5005      5015      5025      5035
2c_SalI      ACTTTGGACA AGGTGAAAGA CGACCATTCT AATTATGTTA ATTATTTAGA TCAAATAATT
2c_Thai      ACTTTAGAGA AGGTGAAAGA CGACCAATCT AATTATGTTA ATTATTTAAA TCAAATAACC
Conservation ***** * ***** * ***** * ***** * ***** * *****

      ....|....| ....|....| ....|....| ....|....| ....|....|
      5045      5055      5065      5075      5085      5095
2c_SalI      ACAGAAAGAG ATCTTATCGT TACAGAAAAA AATAGACTTA ATGGTAAAGA TTCCACTATT
2c_Thai      ACAGAAAGAA ATCTTATCGT TACGAAAAA AATAGACTAA ATGGTATAGA TTCCACTATT
Conservation ***** * ***** * ***** * ***** * ***** * *****

      ....|....| ....|....| ....|....| ....|....| ....|....|
      5105      5115      5125      5135      5145      5155
2c_SalI      AAAAATATAG AAGCGGCACT GAAAGAATCC AAAAAGAATT ACGAAATTGG ACTTTTGGAA
2c_Thai      ACAAATATAG AAGGGGCACT TAAAGAATCC AAAAAGAATT ATGAAATTGG ATTTTGGAA
Conservation * ***** * ***** * ***** * ***** * ***** * *****

      ....|....| ....|....| ....|....| ....|....| ....|....|
      5165      5175      5185      5195      5205      5215
2c_SalI      AAGTTAGAAG AAATAGGTAA AAATATAAAA TTAAAGGTTG ACATAACCAA AGAATCAATA
2c_Thai      AAGTTAGAAG AAATAGGTAA AAATAGAAAA TTAAAGGTTG ACATAACCAA AAAATCAATA
Conservation ***** * ***** * ***** * ***** * ***** * *****

      ....|....| ....|....| ....|....| ....|....| ....|....|
      5225      5235      5245      5255      5265      5275
2c_SalI      AATTCAACAG TGGGAAACTT TTCTTCCCTC TTCAACAATT TTGATTTAAA TCAATATGAC
2c_Thai      AATTCAACAG TGGGAAACTT TTCTTCCCTC TTCAACAATT TTGATTTAAA TCAATATGAC
Conservation ***** * ***** * ***** * ***** * ***** * *****

      ....|....| ....|....| ....|....| ....|....| ....|....|
      5285      5295      5305      5315      5325      5335
2c_SalI      TTTAATAATA ATATAAATGA TTATAAAAAA AAAATGGGAG AAATATATAA CGAATTTGAA
2c_Thai      TTTAATAAAA ATATAAATGA TTATGAAAAT AAAATGGGAG AAATATATAA CGAATTTGAA
Conservation ***** * ***** * ***** * ***** * ***** * *****

      ....|....| ....|....| ....|....| ....|....| ....|....|
      5345      5355      5365      5375      5385      5395
2c_SalI      GGATCATTAA ATAAAATTAG TGAAAATTTA AGAAATGCTT CAGAAAAAGC TTCAGATTAT
2c_Thai      GGATCATTAA ATAAAATTAG TGAAAATTTA AGAAATGCTT CGGAAAACAC TTCAGACTAT
Conservation ***** * ***** * ***** * ***** * ***** * *****

```

|              |             |            |              |            |             |            |
|--------------|-------------|------------|--------------|------------|-------------|------------|
|              | .... ....   | .... ....  | .... ....    | .... ....  | .... ....   | .... ....  |
|              | 5405        | 5415       | 5425         | 5435       | 5445        | 5455       |
| 2c_SalI      | AACTTAGCCA  | AAACACTGAG | GCAAGATGCA   | CAGAAAGAAA | AAGTTAATCT  | ATTAAATAAA |
| 2c_Thai      | AACTCAGCAA  | AAACACTGAG | GCTAGAGGCA   | CAGAAAGAAA | AAGTTAATCT  | ATTAAATAAA |
| Conservation | **** *.*    | *****      | **.* **      | *****      | *****       | *****      |
|              | .... ....   | .... ....  | .... ....    | .... ....  | .... ....   | .... ....  |
|              | 5465        | 5475       | 5485         | 5495       | 5505        | 5515       |
| 2c_SalI      | GAAGAAGAGG  | CAAATAAATA | TTTAAGAGAT   | GTTAAAAAAG | TGGAATCATT  | CAGATTTATA |
| 2c_Thai      | GAAGAAGAGG  | CAAATAAATA | TTTAAGAGAT   | GTTAAAAAAG | TGGAATCATT  | CAGATTTATA |
| Conservation | *****       | *****      | *****        | *****      | *****       | *****      |
|              | .... ....   | .... ....  | .... ....    | .... ....  | .... ....   | .... ....  |
|              | 5525        | 5535       | 5545         | 5555       | 5565        | 5575       |
| 2c_SalI      | CTTAATATGA  | AAGAAAGCCT | AGATAAGATT   | AATGATATGA | TTAAAAACAGA | AAAATTAACA |
| 2c_Thai      | TTTAATATGA  | AAGAAAGCTT | AGATAAGATT   | AATGAGATGA | TTAAAAAGA   | ACAATAACA  |
| Conservation | *****       | ***** *    | *****        | **** **    | *****.*     | *.*.*      |
|              | .... ....   | .... ....  | .... ....    | .... ....  | .... ....   | .... ....  |
|              | 5585        | 5595       | 5605         | 5615       | 5625        | 5635       |
| 2c_SalI      | GTCGATGAAG  | GACATGGTAA | CGTTAAACAG   | CTAGTTGAAA | ATATTAAAGA  | TTTAGTTGAT |
| 2c_Thai      | GTCAATGAAG  | GACAAGGTAA | CGTTAAACAA   | CTAGTTGAAA | ATATTAAAGA  | GTTAGTTGAT |
| Conservation | **.******   | ****.*     | *****.       | *****      | *****       | *****      |
|              | .... ....   | .... ....  | .... ....    | .... ....  | .... ....   | .... ....  |
|              | 5645        | 5655       | 5665         | 5675       | 5685        | 5695       |
| 2c_SalI      | GAAAACAACCT | TATCAGATAT | GTTAAAAACAA  | GCATCAGGCA | AAAATGACGA  | AATACAGAAA |
| 2c_Thai      | GAAAACAACCT | TATCAGATAT | ATTTAAAAACAA | GCGACGGGCA | AAAATGAGGA  | AATACAGAAA |
| Conservation | *****       | *****      | *****        | **.*.*     | *****.*     | *****      |
|              | .... ....   | .... ....  | .... ....    | .... ....  | .... ....   | .... ....  |
|              | 5705        | 5715       | 5725         | 5735       | 5745        | 5755       |
| 2c_SalI      | ATAACGCACT  | CTATGCATAA | AAATAAAGCA   | AAAACATTTT | TAGGACACGT  | AGATACTTCT |
| 2c_Thai      | ATAACGCACT  | CTACGCTTAA | AAATAAAGCA   | AAAACATTTT | TAGGACACGT  | AGATACTTCT |
| Conservation | *****       | *** *.*    | *****        | *****      | *****       | *****      |
|              | .... ....   | .... ....  | .... ....    | .... ....  | .... ....   | .... ....  |
|              | 5765        | 5775       | 5785         | 5795       | 5805        | 5815       |
| 2c_SalI      | GCAAAATATG  | TAGGCATTAA | AATAATGCCA   | GAGTTGGCAT | TAACAGAATT  | GTTAGGAGAT |
| 2c_Thai      | GCAAAATATG  | TAGGCATTAA | AATAACACCT   | GAGTTGGCAC | TAACAGAATT  | GTTAGGAGAT |
| Conservation | *****       | *****      | *****.       | *****.     | *****       | *****      |
|              | .... ....   | .... ....  | .... ....    | .... ....  | .... ....   | .... ....  |
|              | 5825        | 5835       | 5845         | 5855       | 5865        | 5875       |
| 2c_SalI      | TCAAAATTGA  | AAAATGCACA | AGAATTAATA   | TTTGAGCCCA | AAAATAATGT  | ACCACTAGAA |
| 2c_Thai      | GCAAAATTGA  | AAACTGCACA | GGAATTAATA   | TTTGAGTCAA | AAAATAATGT  | AGTACTAGAA |
| Conservation | ****.*      | ***.*      | *****.*      | *****.*    | ***.*       | *.*        |
|              | .... ....   | .... ....  | .... ....    | .... ....  | .... ....   | .... ....  |
|              | 5885        | 5895       | 5905         | 5915       | 5925        | 5935       |
| 2c_SalI      | ACAGAACATA  | TGTCAAAGAA | TACAAACGAA   | CTGGATGTTT | ATAAAAATAT  | ACAGGATGCT |
| 2c_Thai      | ACAGAAAATA  | TGTCAAAGAA | TACAAACGAA   | TTGGATGTTC | ATAAAAATAT  | ACAGGATGCT |
| Conservation | *****.*     | *****      | *****        | *****      | *****       | *****      |
|              | .... ....   | .... ....  | .... ....    | .... ....  | .... ....   | .... ....  |
|              | 5945        | 5955       | 5965         | 5975       | 5985        | 5995       |
| 2c_SalI      | TACAAGGTTG  | CATTGGAAT  | ACTTGCCAC    | TCAGACGAAA | TAGATACAAA  | ACAAAAGAC  |
| 2c_Thai      | TACAAGGTTG  | CACTGGAAT  | ACTTGCCAC    | TCAGACGAAA | TAGATACAAA  | ACAAAAGAC  |
| Conservation | *****       | **         | *****        | *****      | *****       | *****      |

```

      ....|....| ....|....| ....|....| ....|....| ....|....|
      6005      6015      6025      6035      6045      6055
2c_SalI      AGTTCTAAAT TAATAGAAAT GGGAAACGAA ATATATCTTA AGGTTGTGCT AATAAATCAA
2c_Thai      AGTTCTAAAT TAATAGAAAT GGGAAACGAA ATATATCTTA AAGTTGTGCT AATAAATCAA
Conservation *****
      ....|....| ....|....| ....|....| ....|....| ....|....|
      6065      6075      6085      6095      6105      6115
2c_SalI      TACAAAAATA AAATAAGCTC TATAAAAATT AAGGAAGAAG CTGTTTCAGG CAAAATAGAC
2c_Thai      TACAAAAATA AAATAAGCTC TATAAAAATT AAGGAAGAAG CTGTTTCAGG CAAAATAGAC
Conservation *****
      ....|....| ....|....| ....|....| ....|....| ....|....|
      6125      6135      6145      6155      6165      6175
2c_SalI      AATGTTTCCA AAAAACATAG TGAGTTAAGC AAAATTACAT GCAGCGATAA AACTTACGAT
2c_Thai      AATGTTTCCA AAAAACATAG TGAGTTAAGC AAAATTACAT GCAGCGATAA AACTTACGAT
Conservation *****
      ....|....| ....|....| ....|....| ....|....| ....|....|
      6185      6195      6205      6215      6225      6235
2c_SalI      AACATCATAG CGTTAGAGAA ACAAACTGAA TTACAAGATC TACGCAATTC TTTCACGCAA
2c_Thai      AACATCATAG CGTTAGAGAA ACAAACTGAA TTACAAGATC TACGCAATTC TTTCACGCAA
Conservation *****
      ....|....| ....|....| ....|....| ....|....| ....|....|
      6245      6255      6265      6275      6285      6295
2c_SalI      GAAAAGACCG AAACGAATAG CGATTGGAAG TTGGAACAA TTACAAAAGA TTTCGAAAGT
2c_Thai      GAAAAGACCG AAACGAATAG CGATTGGAAG TTGGAACAA TTACAAAAGA TTTCGAAAGT
Conservation *****
      ....|....| ....|....| ....|....| ....|....| ....|....|
      6305      6315      6325      6335      6345      6355
2c_SalI      TTGAAAAATG CATTAAAAAC ACTGGAAGGA GAAGTTAATG CTCTAAAAGC AAGCTCGAAC
2c_Thai      TTGAAAAATG CATTAAAAAC ACTGGAAGGA GAAGTTAATG CTCTAAAAGC AAGCTCGAAC
Conservation *****
      ....|....| ....|....| ....|....| ....|....| ....|....|
      6365      6375      6385      6395      6405      6415
2c_SalI      GATCATGAAT ATGTAAAAGG TAAAAGTGCA CCAATAAATG CTGTGCAAAC CGAAATGGAA
2c_Thai      GATCATGAAT ATGTAAAAGG TAAAAGTGCA CCAATAAATG CTGTGCAAAC CGAAATGGAA
Conservation *****
      ....|....| ....|....| ....|....| ....|....| ....|....|
      6425      6435      6445      6455      6465      6475
2c_SalI      AAGACAGAAA CAGGCATAGA TAGCCTTGAT ACGGCCCTTG ATGAATTATT ACAAAAAGGA
2c_Thai      AAGACAGAAA CAGGCATAGA TAGCCTTGAT ACGGCCCTTG ATGAATTATT ACAAAAAGGA
Conservation *****
      ....|....| ....|....| ....|....| ....|....| ....|....|
      6485      6495      6505      6515      6525      6535
2c_SalI      AGGAAATGCG AAGTATCTAG GTACACATTG ATAAAGGATA CCGTTGTCAA AGAAATAAGT
2c_Thai      AGGAAATGCG AAGTATCTAG GTACACATTG ATAAAGGATA CCGTTGTCAA AGAAATAAGT
Conservation *****
      ....|....| ....|....| ....|....| ....|....| ....|....|
      6545      6555      6565      6575      6585      6595
2c_SalI      GATGACACCG AATTAATCAA CACTATAGAG AAGAATGTTA AAGCATACTT GGCATATGTT
2c_Thai      GATGACACCG AATTAATCAA CACTATAGAG AAGAATGTTA AAGCATACTT GGCATATGTT
Conservation *****

```

```

      ....|....| ....|....| ....|....| ....|....| ....|....|
      6605      6615      6625      6635      6645      6655
2c_SalI      AAAAAAAAAATT ATGAAGACAC AGTGCAGGAT GTTCTCACAT TAAATGAACA TTTCAAAGAA
2c_Thai      AAAAAAAAAATT ATGAAGACAC AGTGCAGGAT GTTCTCACAT TAAATGAACA TTTCAAAGAA
Conservation *****
      ....|....| ....|....| ....|....| ....|....| ....|....|
      6665      6675      6685      6695      6705      6715
2c_SalI      AAACAGGTAA GTAATCACGA GCCAACTAAT TTTGATAAAT CAAATAAGTC ATCCGAAGAG
2c_Thai      AAACAGGTAA GTAATCACGA GCCAACTAAT TTTGATAAAT CAAATAAGTC ATCCGAAGAG
Conservation *****
      ....|....| ....|....| ....|....| ....|....| ....|....|
      6725      6735      6745      6755      6765      6775
2c_SalI      TTAACTAAAG CTGTTACTGA CTCAAAAACA ATAATAAGTA AACTAAAAGG TGTAAATTATA
2c_Thai      TTAACTAAAG CTGTTACTGA CTCAAAAACA ATAATAAGTA AACTAAAAGG TGTAAATTATA
Conservation *****
      ....|....| ....|....| ....|....| ....|....| ....|....|
      6785      6795      6805      6815      6825      6835
2c_SalI      GAAGTTAACG AAAACACTGA AATGAACACT ATAGAAAGCA GTGCAAAGA AATTGAAGCT
2c_Thai      GAAGTTAACG AAAACACTGA AATGAACACT ATAGAAAGCA GTGCAAAGA AATTGAAGCT
Conservation *****
      ....|....| ....|....| ....|....| ....|....| ....|....|
      6845      6855      6865      6875      6885      6895
2c_SalI      CTCTATAACG AATTAAAAAA TAAAAAACA TCATTAAACG AAATTTATCA AACATCAAAT
2c_Thai      CTCTATAACG AATTAAAAAA TAAAAAACA TCATTAAACG AAATTTATCA AACATCAAAT
Conservation *****
      ....|....| ....|....| ....|....| ....|....| ....|....|
      6905      6915      6925      6935      6945      6955
2c_SalI      GAAGTTAAAT TGCAAGAAAT GAAATCAAAT GCTGATAAAT ACATCGATGT ATCTAAAATA
2c_Thai      GAAGTTAAAT TGCAAGAAAT GAAACCAAAT GCTGATAAAT ACATCGATGT ATCTAAAATA
Conservation *****
      ....|....| ....|....| ....|....| ....|....| ....|....|
      6965      6975      6985      6995      7005      7015
2c_SalI      TTTAACACTG TATTAGACAC TCAAAAGTCA AATATAGTAA CTAATCAACA TAGCATAAAC
2c_Thai      TTTAACACTG TATTAGACAC TCAAAAGTCA AAAATAGTGG CTAATCAAAA TAGTATAAAC
Conservation *****
      ....|....| ....|....| ....|....| ....|....| ....|....|
      7025      7035      7045      7055      7065      7075
2c_SalI      AATGTTAAAG ACAAATTAAA AGGAAAGCTA CAGGAATTAA TTGACGCTGA CAGTTCATTT
2c_Thai      AGTGTAAAG GCCAATTAAA CGGAAAGCTA AAGGAATTAA TTCAGGCTGA CAGCTCATTT
Conservation *.******
      ....|....| ....|....| ....|....| ....|....| ....|....|
      7085      7095      7105      7115      7125      7135
2c_SalI      ACATTAGAGT CCATTA AAAA GTTTAACGAA ATATATAGTC ATATTAAGAC TAATATAGGT
2c_Thai      ACATTAGAGT CCATTA AAAA GTTTAACGAA ATATATAGTC ATATTAAGAC TAATATAGGT
Conservation *****
      ....|....| ....|....| ....|....| ....|....| ....|....|
      7145      7155      7165      7175      7185      7195
2c_SalI      GAACTAGAAC AGTTACAACA AACTAATAAA AGTGAACATG ATAATGTTCG AAAGCACAAA
2c_Thai      GAACTAGAAC AGTTACAACA AACTAATAAA AGTGAACATG ATAATGTTCG AAAGCACAAA
Conservation *****

```

|              |            |            |            |            |            |             |
|--------------|------------|------------|------------|------------|------------|-------------|
|              | .... ....  | .... ....  | .... ....  | .... ....  | .... ....  | .... ....   |
|              | 7205       | 7215       | 7225       | 7235       | 7245       | 7255        |
| 2c_SalI      | GAAAAAATTG | TACATTTAAT | AAACAGGGTA | GAAAGTTTGA | AAGGTGATGT | GAAAAATCAT  |
| 2c_Thai      | GAAAAAATTG | TACATTTAAT | AAACAGGGTA | GAAAGTTTGA | AAGGTGATGT | GAAAAATCAT  |
| Conservation | *****      | *****      | *****      | *****      | *****      | *****       |
|              |            |            |            |            |            |             |
|              | .... ....  | .... ....  | .... ....  | .... ....  | .... ....  | .... ....   |
|              | 7265       | 7275       | 7285       | 7295       | 7305       | 7315        |
| 2c_SalI      | GATGATGACC | AATATATGAA | AAAATTAAAT | GCTAGTCTAT | TAAATGATAA | TATTAATAAT  |
| 2c_Thai      | GATGATGACC | AATATATGAA | AAAATTAAAT | GCTAGTCTAT | TAAATGATAA | TATTAATAAT  |
| Conservation | *****      | *****      | *****      | *****      | *****      | *****       |
|              |            |            |            |            |            |             |
|              | .... ....  | .... ....  | .... ....  | .... ....  | .... ....  | .... ....   |
|              | 7325       | 7335       | 7345       | 7355       | 7365       | 7375        |
| 2c_SalI      | ACAACGAATT | CTATAAACAT | ATCAGATGAA | GAACCTAAGA | AACTATTGAA | AAAAGTTGAA  |
| 2c_Thai      | ACAACGAATT | CTATAAACAT | ATCAGATGAA | GAACCTAAGA | AACTATTGAA | AAAAGTTGAA  |
| Conservation | *****      | *****      | *****      | *****      | *****      | *****       |
|              |            |            |            |            |            |             |
|              | .... ....  | .... ....  | .... ....  | .... ....  | .... ....  | .... ....   |
|              | 7385       | 7395       | 7405       | 7415       | 7425       | 7435        |
| 2c_SalI      | GAGAATGATC | AGCTATGTAA | AAATAACAAT | ACGCAGAACT | TCATTTCGGA | CATTATGAAA  |
| 2c_Thai      | GAGAATGATC | AGCTATGTAA | AAATAACAAT | ACGCAGAACT | TCATTTCGGA | CATTATGAAA  |
| Conservation | *****      | *****      | *****      | *****      | *****      | *****       |
|              |            |            |            |            |            |             |
|              | .... ....  | .... ....  | .... ....  | .... ....  | .... ....  | .... ....   |
|              | 7445       | 7455       | 7465       | 7475       | 7485       | 7495        |
| 2c_SalI      | CGTGTAGAAG | ACTTGAATAG | ACGATTTACA | GAAAATTTAC | CGGAAAAAGA | AAAACCTTCAT |
| 2c_Thai      | CGTGTAGAAG | ACTTGAATAG | ACGATTTACA | GAAAATTTAC | CGGAAAAAGA | AAAACCTTCAT |
| Conservation | *****      | *****      | *****      | *****      | *****      | *****       |
|              |            |            |            |            |            |             |
|              | .... ....  | .... ....  | .... ....  | .... ....  | .... ....  | .... ....   |
|              | 7505       | 7515       | 7525       | 7535       | 7545       | 7555        |
| 2c_SalI      | CAAATTGAAA | ACAACATAAA | TGAAATTAGT | TCAATATTTA | GTGAAATAAA | CTTACAAGAC  |
| 2c_Thai      | CAAATTGAAA | ACAACATAAA | TGAAATTAGT | TCAATATTTA | GTGAAATAAA | CTTACAAGAC  |
| Conservation | *****      | *****      | *****      | *****      | *****      | *****       |
|              |            |            |            |            |            |             |
|              | .... ....  | .... ....  | .... ....  | .... ....  | .... ....  | .... ....   |
|              | 7565       | 7575       | 7585       | 7595       | 7605       | 7615        |
| 2c_SalI      | GTCGATGAAT | TTGTTGCAAA | AATTCACAAA | CAAATTGATG | CTGAAAAGGC | AAGCGTAAAT  |
| 2c_Thai      | GTCGATGAAT | TTGTTGCAAA | AATTCACAAA | CAAATTGATG | CTGAAAAGGC | AAGCGTAAAT  |
| Conservation | *****      | *****      | *****      | *****      | *****      | *****       |
|              |            |            |            |            |            |             |
|              | .... ....  | .... ....  | .... ....  | .... ....  | .... ....  | .... ....   |
|              | 7625       | 7635       | 7645       | 7655       | 7665       | 7675        |
| 2c_SalI      | AATGTAAGAG | AGGCTGAAAA | AATAAGGACC | GCAATCCAAA | ATGTTACAAG | TTATGATACA  |
| 2c_Thai      | AATGTAAGAG | AGGCTGAAAA | AATAAGGACC | GCAATCCAAA | ATGTTACAAG | TTATGATACA  |
| Conservation | *****      | *****      | *****      | *****      | *****      | *****       |
|              |            |            |            |            |            |             |
|              | .... ....  | .... ....  | .... ....  | .... ....  | .... ....  | .... ....   |
|              | 7685       | 7695       | 7705       | 7715       | 7725       | 7735        |
| 2c_SalI      | GAAATAATAA | GTAGACTATC | TGAAATGAAT | AATGTACTAG | AAAGGATTAC | TACACGGAAA  |
| 2c_Thai      | GAAATAATAA | GTAGACTATC | TGAAATGAAT | AATGTACTAG | AAAGGATTAC | TACACGGAAA  |
| Conservation | *****      | *****      | *****      | *****      | *****      | *****       |
|              |            |            |            |            |            |             |
|              | .... ....  | .... ....  | .... ....  | .... ....  | .... ....  | .... ....   |
|              | 7745       | 7755       | 7765       | 7775       | 7785       | 7795        |
| 2c_SalI      | ACAAAAATGG | ATCAATTATT | AAAATCATTG | TCCCCAGATA | ATACAAGTCT | AAATTTAAAT  |
| 2c_Thai      | ACAAAAATGG | ATCAATTATT | AAAATCATTG | TCCCCAGATA | ATACAAGTCT | AAATTTAAAT  |
| Conservation | *****      | *****      | *****      | *****      | *****      | *****       |

|              |            |            |            |             |            |            |
|--------------|------------|------------|------------|-------------|------------|------------|
|              | .... ....  | .... ....  | .... ....  | .... ....   | .... ....  | .... ....  |
|              | 7805       | 7815       | 7825       | 7835        | 7845       | 7855       |
| 2c_SalI      | GCAAGAACAC | ACGTAAGGAA | ATCAGAAGAC | ATAATTAAAC  | AGCTAAATAG | CCATATAGAA |
| 2c_Thai      | GCAAGAACAC | ACGTAAGGAA | CTCAGAAGAC | TTAATTAATA  | GGCTAAATAG | CCATATAGAA |
| Conservation | *****      | *****      | *****      | *****       | *****      | *****      |
|              |            |            |            |             |            |            |
|              | .... ....  | .... ....  | .... ....  | .... ....   | .... ....  | .... ....  |
|              | 7865       | 7875       | 7885       | 7895        | 7905       | 7915       |
| 2c_SalI      | AAAATAACAG | AACTAAATAC | ATATGCCCAT | GAAGTAATGA  | CATACTTAGA | AAATGAACTA |
| 2c_Thai      | AAAATAACAA | AACTAAATAC | ACATGCCCAC | GAAGTAATGA  | CATACTTAGA | AAATGAACTA |
| Conservation | *****      | *****      | *****      | *****       | *****      | *****      |
|              |            |            |            |             |            |            |
|              | .... ....  | .... ....  | .... ....  | .... ....   | .... ....  | .... ....  |
|              | 7925       | 7935       | 7945       | 7955        | 7965       | 7975       |
| 2c_SalI      | AATAAATTAT | TAAAACAAC  | TGAAATTGAA | AGTGCAAAAAG | TTGAGCCTGA | AGCTTTGCCA |
| 2c_Thai      | AGTAAATTAT | TAAAACAAC  | TGAAATTGAA | AGTGCAAAAAG | TTGAGCCTGA | AGCTTTGCCA |
| Conservation | *.*****    | *****      | *****      | *****       | *****      | *****      |
|              |            |            |            |             |            |            |
|              | .... ....  | .... ....  | .... ....  | .... ....   | .... ....  | .... ....  |
|              | 7985       | 7995       | 8005       | 8015        | 8025       | 8035       |
| 2c_SalI      | AGTGATACGG | AAGTAAAAGA | AGAAAAAGTT | CCACCAACGG  | TAACAGAAAA | TGGTCCACAA |
| 2c_Thai      | AGTGATACGG | AAGTAAAAGA | AGAAAAAGTT | CCACCAACGG  | TAACAGAAAA | TGGTCCACAA |
| Conservation | *****      | *****      | *****      | *****       | *****      | *****      |
|              |            |            |            |             |            |            |
|              | .... ....  | .... ....  | .... ....  | .... ....   | .... ....  | .... ....  |
|              | 8045       | 8055       | 8065       | 8075        | 8085       | 8095       |
| 2c_SalI      | GAGAATTTGA | CAAGCGTTC  | CCAAGAGACA | TTAGAAGATA  | ACACACCACA | GATCCAAGAA |
| 2c_Thai      | GAGAATTTGA | CAAGCGTTC  | CCAAGAGACA | TCAGAAGATA  | ACACACCACA | GATCCAAGAA |
| Conservation | *****      | *****      | *****      | * *****     | *****      | *****      |
|              |            |            |            |             |            |            |
|              | .... ....  | .... ....  | .... ....  | .... ....   | .... ....  | .... ....  |
|              | 8105       | 8115       | 8125       | 8135        | 8145       | 8155       |
| 2c_SalI      | AATGTTGTAC | AAGAGGATTC | AGTAATCGCT | CCTCAGGAGC  | AAGTAGAATA | TAGTACACTA |
| 2c_Thai      | AATGTTGTAC | AAGAGGATTC | AGTAATCGCT | CCTCAGGAGC  | AAGTAGAATA | TAGTACACTA |
| Conservation | *****      | *****      | *****      | *****       | *****      | *****      |
|              |            |            |            |             |            |            |
|              | .... ....  | .... ....  | .... ....  | .... ....   | .... ....  | .... ....  |
|              | 8165       | 8175       | 8185       | 8195        | 8205       | 8215       |
| 2c_SalI      | GCGGTACCAG | AAAATGATGA | AACAACAGAA | GAAGAAAGTG  | AACATGACGA | TGCGCATGAC |
| 2c_Thai      | GCGGTACCAG | AAAATGATGA | AACAACAGAA | GAAGAAAGTG  | AACATGACGA | TGCGCATGAC |
| Conservation | *****      | *****      | *****      | *****       | *****      | *****      |
|              |            |            |            |             |            |            |
|              | .... ....  | .... ....  | .... ....  | .... ....   | .... ....  | .... ....  |
|              | 8225       | 8235       | 8245       | 8255        | 8265       | 8275       |
| 2c_SalI      | GATACGCATG | ACGAATCACA | AACTGGAAGG | GATTCAACGG  | CAAAAGAAGC | AATTGGAAAG |
| 2c_Thai      | GATACGCATG | ACGAATCACA | AACTGGAAGG | GATTCAACGG  | CAAAAGAAGC | AATTGGAAAG |
| Conservation | *****      | *****      | *****      | *****       | *****      | *****      |
|              |            |            |            |             |            |            |
|              | .... ....  | .... ....  | .... ....  | .... ....   | .... ....  | .... ....  |
|              | 8285       | 8295       | 8305       | 8315        | 8325       | 8335       |
| 2c_SalI      | ACTCGTTTAG | CAGGAGCTGT | TATTATTGCC | ATGTCTGTTT  | TATCCGATT  | TATTATAATA |
| 2c_Thai      | ACTCGTTTAG | CAGGAGCTGT | TATTATTGCC | ATGTCTGTTT  | TATCCGATT  | TATTATAATA |
| Conservation | *****      | *****      | *****      | *****       | *****      | *****      |
|              |            |            |            |             |            |            |
|              | .... ....  | .... ....  | .... ....  | .... ....   | .... ....  | .... ....  |
|              | 8345       | 8355       | 8365       | 8375        | 8385       | 8395       |
| 2c_SalI      | GTATTTAAAG | ATAAAGATGA | AGAAGAAAAG | GATCACAACG  | AACACGGATA | TAACGAAGCA |
| 2c_Thai      | GTATTTAAAG | ATAAAGATGA | AGAAGAAAAG | GATCACAACG  | AACACGGATA | TAACGAAGCA |
| Conservation | *****      | *****      | *****      | *****       | *****      | *****      |



```

      ....|....| ....|....| ....|....| ....|....| ....|....| ....|....|
      8405      8415      8425      8435      8445      8455
2c_SalI  TTTGGAGAAC ATGACGAATA TAATATGCAT GATAAAGAAG AAGTTATCGA AGTTTGCTTT
2c_Thai  TTTGGAGAAC ATGACGAATA TAATATGCAT GATAAAGAAG AAGTTATCGA AGTTTGCTTT
Conservation *****

```

```

      ....|....| ....|
      8465      8475
2c_SalI  AATGAAGAAG ATTAA
2c_Thai  AATGAAGAAG ATTAA
Conservation *****

```

**Alignment: Pvrpb2p1**

```

      ....|....| ....|....| ....|....| ....|....| ....|....|
      5          15          25          35          45          55
2p1_SalI  ATGGAAAAAA ATATCCTGTG GGTAATCTTT TACAATTTCC TGTTTATTCT TTTGGCATCA
2p1_Thai  ATGGAAAAAA ATATCCTGTG GGTAATCTTT TACAATTTCC TGTTTATTCT TTTGGCATCA
Conservation *****
      ....|....| ....|....| ....|....| ....|....| ....|....|
      65          75          85          95          105         115
2p1_SalI  TGTAAGGACA CACATCGAAG CAAACCTAGC AGACTAAAAC ATGACCATAA TTTATTACCA
2p1_Thai  TGTAAGGACA CACATCGAAG CAAACCTAGC AGACTAAAAC ATGACCATAA TTTATTGCCA
Conservation *****
      ....|....| ....|....| ....|....| ....|....| ....|....|
      125         135         145         155         165         175
2p1_SalI  AATTACGCTA ATTTAATGAG GGATGATCAA AACGGACAAA ACAGTGAAAA CAGAGGAGAC
2p1_Thai  AATTACGCTA ATTTAATGAA GGATGATCAA AACGGACAAA ACAGTGAAAA CAGAGGAGAC
Conservation *****
      ....|....| ....|....| ....|....| ....|....| ....|....|
      185         195         205         215         225         235
2p1_SalI  AACATAAACA ATCACAATAA AAACCATAAC GATCAGAACA ACCATAATGG TAATAATGAT
2p1_Thai  AACATAAACA ATCACAATAA AAACCATAAC GATCAGAACA ACCATAATGG TAATAATGAT
Conservation *****
      ....|....| ....|....| ....|....| ....|....| ....|....|
      245         255         265         275         285         295
2p1_SalI  AACAGCATTA ATAGTGAATA CCTAAAACG TCACATCTAC AGAATAGTTC GGCCATGGTA
2p1_Thai  AACAGCATTA ATAGTGAATA CCTAAAACG TCACATCTAC AGAATAGTTC GGCCATGGTA
Conservation *****
      ....|....| ....|....| ....|....| ....|....| ....|....|
      305         315         325         335         345         355
2p1_SalI  CACCTAAACG ATCATAAAAT TACAACAAAG CCAGCTCGCT ATTCTTACAT ACAAAGAAGC
2p1_Thai  CACCTAAATG ATCATAAAAT TACAACAAAG CCAGCTCGCT ATTCTTACAT ACAAAGAAGC
Conservation *****
      ....|....| ....|....| ....|....| ....|....| ....|....|
      365         375         385         395         405         415
2p1_SalI  AAAATATATG CCTTTAACCC AAATAATAAA AAAATAGAAA ATATTAATAA CGAATTGCAT
2p1_Thai  AAAATATATG CACTTAACCC AAATAATAAA AAAATAGAAA ATATTAATAA CGAATTGCAT
Conservation *****
      ....|....| ....|....| ....|....| ....|....| ....|....|
      425         435         445         455         465         475
2p1_SalI  AGTGTTCCAA ATTCATTTGT TCAGTATTAT GTATACACCA ATCTAAATGT TATAGTACAA
2p1_Thai  AGTGTTCCAA ATTCATTTGT TCAGTATTAT GTATACACCA ATCTAAATGC TACAGTATAT
Conservation *****
      ....|....| ....|....| ....|....| ....|....| ....|....|
      485         495         505         515         525         535
2p1_SalI  AAGATGCGTT ACATTAGTAT CATCGATGAG TATAATAATA TAATTTCTTT GCATCTGCCT
2p1_Thai  AAGATGCGTT ACATTAGTAT CTTCGATGAG TATAATAATA TAGTTTCTTT GCATCTGCCT
Conservation *****
      ....|....| ....|....| ....|....| ....|....| ....|....|
      545         555         565         575         585         595
2p1_SalI  TATCATGCTA GAGTATATTA CTTAATGGAA TTAAAAAATT ATTCAGTGGC TCATAAAGAA
2p1_Thai  TATCATGCTA GAGTAAATTA CTTAATGGAA ATAAAAAATT ATTCAGTGGC TTATAGAGAA
Conservation *****

```

|              |            |             |             |            |             |             |
|--------------|------------|-------------|-------------|------------|-------------|-------------|
|              | .... ....  | .... ....   | .... ....   | .... ....  | .... ....   | .... ....   |
|              | 605        | 615         | 625         | 635        | 645         | 655         |
| 2p1_SalI     | TTACAGAGTT | ATGTTTATAG  | TTATTATGAT  | CCACAAATAG | ACAAAGTTTT  | CAAGGCTGCA  |
| 2p1_Thai     | TTACAGAGTG | ATGTTTATAG  | TTATTATGAT  | CCACAAATAG | ACAAAGTTTT  | CAAGGTTGCA  |
| Conservation | *****.     | *****       | *****       | *****      | *****       | ****.*      |
|              |            |             |             |            |             |             |
|              | .... ....  | .... ....   | .... ....   | .... ....  | .... ....   | .... ....   |
|              | 665        | 675         | 685         | 695        | 705         | 715         |
| 2p1_SalI     | GAGAAAAATG | GCTTTGTCTG  | TGAAAAATGAC | ATAAACAATT | TATATAATAT  | AGTAACTCAT  |
| 2p1_Thai     | GAGAAAAATG | CAATTGTCTG  | TGAAAAAGTAC | ATAAACAATT | TATATAATAC  | AGTAACTCGT  |
| Conservation | *****      | ..*****     | *****.*     | *****      | *****       | *****.*     |
|              |            |             |             |            |             |             |
|              | .... ....  | .... ....   | .... ....   | .... ....  | .... ....   | .... ....   |
|              | 725        | 735         | 745         | 755        | 765         | 775         |
| 2p1_SalI     | TTAGAAAATC | CAGAACACTA  | TAAAAATAAG  | AGATACAATT | ATTCCAAAAGA | CAGAGAAAAA  |
| 2p1_Thai     | TTAGAAAATC | CAGAACAATT  | TAAAAATAAC  | AGAGACAATT | ATTCCAAAAGA | AATAAAAAGAA |
| Conservation | *****      | *****.*     | *****.      | ***.*      | *****       | .*.*.*.*    |
|              |            |             |             |            |             |             |
|              | .... ....  | .... ....   | .... ....   | .... ....  | .... ....   | .... ....   |
|              | 785        | 795         | 805         | 815        | 825         | 835         |
| 2p1_SalI     | TTCCAAAAC  | AACTTTCGTC  | CGTTCATGGC  | TGCTTATTAA | CAAATCATAA  | ACAAAATTAC  |
| 2p1_Thai     | TACCAAAAAC | AACTTACGTC  | CCTTCATGAT  | TGCTTATTTG | AAAATCATAG  | ACCAAAATTAC |
| Conservation | *:*****    | *****.*     | *.*****.    | *****.     | .*****.     | **.*        |
|              |            |             |             |            |             |             |
|              | .... ....  | .... ....   | .... ....   | .... ....  | .... ....   | .... ....   |
|              | 845        | 855         | 865         | 875        | 885         | 895         |
| 2p1_SalI     | AAAGACATGA | TATATGCTGA  | CACAACAATT  | TTCGATTATT | TACATTATAT  | ATACTGTTAT  |
| 2p1_Thai     | AAAGACATAA | TATATGCTGA  | TACAACAATT  | TTCGATTCTT | TACAAAATAT  | ATACTGTTAT  |
| Conservation | *****.*    | *****       | *****       | *****.*    | ***.*       | *****       |
|              |            |             |             |            |             |             |
|              | .... ....  | .... ....   | .... ....   | .... ....  | .... ....   | .... ....   |
|              | 905        | 915         | 925         | 935        | 945         | 955         |
| 2p1_SalI     | CCGGAAGATA | AATGTTTCATC | AAAATATTAT  | CGTGATATGC | TAAATATATC  | TATGGGAAAA  |
| 2p1_Thai     | TCGGAAGATA | AATGTCTATC  | AAAATTGTAT  | CGTGATATGC | TTGGTTTATC  | TATGAAAAAA  |
| Conservation | *****      | *****.*     | *****.*     | *****      | **.*.*      | ***.*       |
|              |            |             |             |            |             |             |
|              | .... ....  | .... ....   | .... ....   | .... ....  | .... ....   | .... ....   |
|              | 965        | 975         | 985         | 995        | 1005        | 1015        |
| 2p1_SalI     | ATTAATGAAT | ATGAACAGAA  | AAAAAAAAAAT | GAAGCTATAA | ATAAAATTAT  | TGATGTACAC  |
| 2p1_Thai     | ATTAATGAAT | ATGAACAGAA  | AAAAAAAAAAT | GAAGATATAA | ATAAAATTAT  | TAATATACAC  |
| Conservation | *****      | *****       | *****       | ***.*      | *****       | *.*.*       |
|              |            |             |             |            |             |             |
|              | .... ....  | .... ....   | .... ....   | .... ....  | .... ....   | .... ....   |
|              | 1025       | 1035        | 1045        | 1055       | 1065        | 1075        |
| 2p1_SalI     | GAAACTGGTG | CATATGTAAT  | GAGGAAAATA  | AAAGAAGAAT | TAAATCCAAG  | CTTAAATTCT  |
| 2p1_Thai     | GATACTGCTG | TAGATGTAAT  | GAGGAAAATA  | AAAAGGGAAT | TAAATCCAAG  | CTTAAATTCT  |
| Conservation | *.*.*.*.*  | *.*         | *****       | ***.*      | *****       | *****       |
|              |            |             |             |            |             |             |
|              | .... ....  | .... ....   | .... ....   | .... ....  | .... ....   | .... ....   |
|              | 1085       | 1095        | 1105        | 1115       | 1125        | 1135        |
| 2p1_SalI     | GATGTGGCAG | ATTTTCGTAAT | AGATGAAATT  | AAATATATTA | TAGAGAGACT  | TAATGCACAC  |
| 2p1_Thai     | GATGTGGCAG | ATTTTCGTAAT | AGGTGAAATT  | AAATATATTA | TAGAGAGACT  | TAAGGCACAC  |
| Conservation | *****      | *****       | *.*         | *****      | *****       | ***.*       |
|              |            |             |             |            |             |             |
|              | .... ....  | .... ....   | .... ....   | .... ....  | .... ....   | .... ....   |
|              | 1145       | 1155        | 1165        | 1175       | 1185        | 1195        |
| 2p1_SalI     | TCAGAAAAAA | TAAAATGTGC  | ATCCGATTTT  | ATAAAACATA | TATATAAAGA  | AAAAGTGCAG  |
| 2p1_Thai     | TCAGAAAAAA | TTAAAAGTGC  | ATCCGATTTG  | GTAAAATATA | TAAATCAAGA  | AACTGTGCCG  |
| Conservation | *****      | *.*.*.*     | *****.      | .*****.*   | *.*.*       | *.*.*.*.*   |

```

.....|.....| .....|.....| .....|.....| .....|.....| .....|.....|
      1205      1215      1225      1235      1245      1255
2p1_SalI  AACGAAATCT CAAAAAATGA GCTTGAAGT AATTATATTG TATTAAGTAT TCACCACGGT
2p1_Thai  AACGAAATCT CAAAAAATGA GATTAAAAGT AATTATATTG TGTTAGCTAT TCACACCGGT
Conservation *****
.....|.....| .....|.....| .....|.....| .....|.....| .....|.....|
      1265      1275      1285      1295      1305      1315
2p1_SalI  TCTTTTCGTT TTAGTACTGA ACATGTAATC ATGTTAGAGG AAATATTCAA AAGTAAAGAA
2p1_Thai  TCCTTTCTTT TTAGTACTGA ACATGTAAAA ATGTTAGAGG AAATATTCAA AAGTAAAGAA
Conservation **.....**
.....|.....| .....|.....| .....|.....| .....|.....| .....|.....|
      1325      1335      1345      1355      1365      1375
2p1_SalI  CAAATACTTC ACAACATTG CAGCAAATTT TTGAATGAGT TGAAAAACAA AATAACTGCT
2p1_Thai  CAAATACTTT ACAAATTTG TAGTAAATTT TTGAATGACT TGAAAAACAG AATAACTACT
Conservation *****
.....|.....| .....|.....| .....|.....| .....|.....| .....|.....|
      1385      1395      1405      1415      1425      1435
2p1_SalI  CTTATAAATT CGGAATATTC TTCATCAAAA TGCCTCCTA TTGTTTCTAC TTGTGAAGAA
2p1_Thai  CTGATAAATT CGGAATATTC TTCATCAAAC TGCCTCCTA TTGTTTCTAC TTGTGAAGAA
Conservation **.....**
.....|.....| .....|.....| .....|.....| .....|.....| .....|.....|
      1445      1455      1465      1475      1485      1495
2p1_SalI  GCCAAAACAT CCTTAGAATC CTTGCGTACT TCGAGCACCG AAAAAGTAGG TAAGCATGAT
2p1_Thai  GCCAAAAAAT CCTTAGAATC CTTGCGTACT TCGAGCACCG GAAAAGTAGG TAAGCATGAT
Conservation *****
.....|.....| .....|.....| .....|.....| .....|.....| .....|.....|
      1505      1515      1525      1535      1545      1555
2p1_SalI  CTAAATTCOA AGCCGGAAAT TGCATCAGTT AAACAGAGTT ATGATGGGAA AATGATTAAA
2p1_Thai  CTAAATTCOA AGCCGGAAAT TGCATCAGTT AAACAGAGTT ATGATGGGAA AATGATTAAA
Conservation *****
.....|.....| .....|.....| .....|.....| .....|.....| .....|.....|
      1565      1575      1585      1595      1605      1615
2p1_SalI  TTAGCAGAAG CTATAAAAAG AGCCGAAGAA ATAATCAATT CTGTAAAGGA CATCGTTCAG
2p1_Thai  TTAGCAGAAG CTATAAAAAG AGCCGAAGAA ATAATCAATT CTGTAAAGGA CATCGTTCAG
Conservation *****
.....|.....| .....|.....| .....|.....| .....|.....| .....|.....|
      1625      1635      1645      1655      1665      1675
2p1_SalI  TTTAACACAA CCGAAACAGA TACTATGAAA AAGGAAACAG ATAGAATAAT ATCCCTAAAT
2p1_Thai  TTTAACACAA CCGAAACAGA AGCAAAGAAA AAGGAAACAG ATAG---CAT ACCCCAAAAT
Conservation *****
.....|.....| .....|.....| .....|.....| .....|.....| .....|.....|
      1685      1695      1705      1715      1725      1735
2p1_SalI  ATAAATCCAC TATCGAAGGA TAAAATGCTT TTAGAAGTAA TAGATTCAAT AAAAAACAA
2p1_Thai  ATAAATGCAC TAGAGAAGGA TAAAAACTT TTAGAAGTAA TAGATGCAAT AAAAAACAA
Conservation *****
.....|.....| .....|.....| .....|.....| .....|.....| .....|.....|
      1745      1755      1765      1775      1785      1795
2p1_SalI  AAAGAAAAAA TATCGGAAAA TTCTAACAAA ATAAAAGAAAT CTTCTGACGC AGCTGATGCT
2p1_Thai  AAACAAAAAA TATCGGAAAA TTCTAACAAA ATAAAAGAAAT TTTCTGGTGC AGCTGATACT
Conservation ***

```

```

      ....|....| ....|....| ....|....| ....|....| ....|....|
      1805      1815      1825      1835      1845      1855
2p1_SalI  TAAAAGCTG AAGTTGAAGA ATTAAAGAAA GGTATTGATG AAGATGTGAA TAAAATATTA
2p1_Thai  TAAAAGCTG AAGTCGAAGA ATTAAAGAAA GGTATTGATG AAGATGTTAA TAAAATATTA
Conservation ***** ** ** ***** ***** ***** ** *****

```

```

      ....|....| ..
      1865
2p1_SalI  AAGCCATTCT AA
2p1_Thai  AAGCCATTCT AA
Conservation ***** **

```

**Alignment: Pvrpb2d**

```

      ....|.....| .....|.....| .....|.....| .....|.....| .....|.....|
      5          15          25          35          45          55
2d_SalI  ATGGAAAAAA GAGCCTTTTG GATCATCTTT TACAATTTAA TATTATTTT TTCGCATCA
2d_Thai  ATGGAAAAAA AAGCCCTTTG GATCATCTTT TACAATTTCA TACTATTCT TTCGCATCA
Conservation ***** .**** ** * ***** * ***** * ***** *

      ....|.....| .....|.....| .....|.....| .....|.....| .....|.....|
      65          75          85          95          105         115
2d_SalI  TGTAAGGATG TCAATCGAAA CAAACCCGGA AGACTAAAAT ATCATCGGAA GCTATTACCA
2d_Thai  TGTAAGGATG TCAATCGAAA CAAACCCGGA AGACTAAAAT ATCATCGGAA GCTATTACCA
Conservation ***** ***** ***** ***** ***** ***** *****

      ....|.....| .....|.....| .....|.....| .....|.....| .....|.....|
      125         135         145         155         165         175
2d_SalI  GCATATGTTA ACTTAATGAG CCCTGATAAA GACGGATATA AGGGTGCCGA AAAGGATGAT
2d_Thai  GCATATGTTA ACTTAATGAG CCCTGATAAA GACGGATATA AGGGTGCCGA AAAGGATGAT
Conservation ***** ***** ***** ***** ***** ***** *****

      ....|.....| .....|.....| .....|.....| .....|.....| .....|.....|
      185         195         205         215         225         235
2d_SalI  AAGGCAAATA ATCATAACGA CAACAATAAT GGCAACAATA ATGACAACAA TAATAATAGT
2d_Thai  AAGGCAAATA ATCATAACGA CAACAATAAT GGCAACAATA ATGACAACAA TAATAATAGT
Conservation ***** ***** ***** ***** ***** ***** *****

      ....|.....| .....|.....| .....|.....| .....|.....| .....|.....|
      245         255         265         275         285         295
2d_SalI  GACAATAATG ATGAAAACAG TAATAATAGT GAAAATCTCA GAACGTCAAA TTACAAAAT
2d_Thai  GACAATAATG ATGAAAACAG TAATAATAGT GAAAATCTCA GAACGTCAAA TTACAAAAT
Conservation ***** ***** ***** ***** ***** ***** *****

      ....|.....| .....|.....| .....|.....| .....|.....| .....|.....|
      305         315         325         335         345         355
2d_SalI  AGTTCATCAG TGGGGCATTT AAACAACCAC GAAGATACAA CGAAACCATC CCATTACTCT
2d_Thai  AGTTCATCAG TGGGGCATTT AAACAACCAC GAAGATACAA CGAAACCATC CCATTATTCT
Conservation ***** ***** ***** ***** ***** ***** *****

      ....|.....| .....|.....| .....|.....| .....|.....| .....|.....|
      365         375         385         395         405         415
2d_SalI  TACTTGAAAA AAAGCAACAT ATATGCACCG GATGCAAAGA ATAATAAAAT GGAAGATGAT
2d_Thai  TACTTGAAAA AAAGCAACAT ATATGCACCG GATGCAAAGA ATAATAAAAT GGAAGATGAT
Conservation ***** ***** ***** ***** ***** ***** *****

      ....|.....| .....|.....| .....|.....| .....|.....| .....|.....|
      425         435         445         455         465         475
2d_SalI  AATAAAAAAT TGCATACTGT TTCAAATTC TTCATTCAA ATAGTAAACA AGCCAAAAT
2d_Thai  AATAAAAAAT TGCATACTGT TTCAAATTC TTCATTCAA ATAGTAAACA AGCCAAAAT
Conservation ***** ***** ***** ***** ***** ***** *****

      ....|.....| .....|.....| .....|.....| .....|.....| .....|.....|
      485         495         505         515         525         535
2d_SalI  ATAATTGCAA CTAATAATTT GGATTATATT AGTGCCATTG ATGATTATAA CAATATAATT
2d_Thai  ATAATTGCAA CTAATAATTT GGATTATATT AGTGCCATTG ATGATTATAA CAATATAATT
Conservation ***** ***** ***** ***** ***** ***** *****

      ....|.....| .....|.....| .....|.....| .....|.....| .....|.....|
      545         555         565         575         585         595
2d_SalI  TCTTCATTTC AACCATATCA TGCTAGTGTA TATTACTTGA ATGAATTGAA ATACTATGCA
2d_Thai  TCTTCATTTC AACCATAACA TGCTAGTGTA TATTACTTGA ATGAATTGAA ATACTATGCA
Conservation ***** ***** ** ***** ***** ***** *****

```

|              |            |            |            |            |            |            |
|--------------|------------|------------|------------|------------|------------|------------|
|              | .... ....  | .... ....  | .... ....  | .... ....  | .... ....  | .... ....  |
|              | 605        | 615        | 625        | 635        | 645        | 655        |
| 2d_SalI      | ACACATTACA | ATGAATTGAA | GGTCTCTGTT | CAAAAAGATG | TCATTCCTCA | AGTAACACAC |
| 2d_Thai      | ACACATTACA | ATGAATTGAA | GGTCTCTGTT | CAAAAAGATG | TCATTCCTCA | AGTAACACAC |
| Conservation | *****      | *****      | *****      | *****      | *****      | *****      |
|              | .... ....  | .... ....  | .... ....  | .... ....  | .... ....  | .... ....  |
|              | 665        | 675        | 685        | 695        | 705        | 715        |
| 2d_SalI      | ATTACCAATA | TTGTTGAGAA | AAACGTTAAG | ATCTGTTTGG | AGAAAACACA | TGAATTGAAT |
| 2d_Thai      | ATTACCAATA | TTGTTGAGAA | AAACGTTAAG | ATCTGTTTGG | AGAAAACACA | TGAATTGAAT |
| Conservation | *****      | *****      | *****      | *****      | *****      | *****      |
|              | .... ....  | .... ....  | .... ....  | .... ....  | .... ....  | .... ....  |
|              | 725        | 735        | 745        | 755        | 765        | 775        |
| 2d_SalI      | ACATTAATAA | CTCAATTAGA | AAATCCACAA | ACATATAATA | TTCAAAGAAG | CCATTATAGT |
| 2d_Thai      | ACATTAATAA | CTCAATTAGA | AAATCCACAA | ACATATAATA | TTCAAAGAAG | CCATTATAGT |
| Conservation | *****      | *****      | *****      | *****      | *****      | *****      |
|              | .... ....  | .... ....  | .... ....  | .... ....  | .... ....  | .... ....  |
|              | 785        | 795        | 805        | 815        | 825        | 835        |
| 2d_SalI      | AATAGAGTAA | AAGATTACCG | TAAGAAAATT | GAGGATATTC | AAAATTGTTT | AAAATTAAAT |
| 2d_Thai      | AATAGAGTAA | AAGATTACCG | TAAGAAAATT | GAGGATATTC | AAAATTGTTT | AAAATTAAAT |
| Conservation | *****      | *****      | *****      | *****      | *****      | *****      |
|              | .... ....  | .... ....  | .... ....  | .... ....  | .... ....  | .... ....  |
|              | 845        | 855        | 865        | 875        | 885        | 895        |
| 2d_SalI      | TATAAAAGAA | ATGTTAAAGC | TACAGTATTT | GCCACAATAA | TATGGTTCCA | GACACTAATT |
| 2d_Thai      | TATAAAAGAA | ATGTTAAAGC | TACAGTATTT | GCCACAATAA | TATGGTTCCA | GACACTAATT |
| Conservation | *****      | *****      | *****      | *****      | *****      | *****      |
|              | .... ....  | .... ....  | .... ....  | .... ....  | .... ....  | .... ....  |
|              | 905        | 915        | 925        | 935        | 945        | 955        |
| 2d_SalI      | AAAATGGAAT | GTAGTTGGTG | GACCAAATCA | TGTTCAACGA | GAATCTATTA | TAATATGATT |
| 2d_Thai      | AAAATGGAAT | GTAGTTGGTG | GACCAAATCA | TGTTCAACGA | GAATCTATTA | TAATATGATT |
| Conservation | *****      | *****      | *****      | *****      | *****      | *****      |
|              | .... ....  | .... ....  | .... ....  | .... ....  | .... ....  | .... ....  |
|              | 965        | 975        | 985        | 995        | 1005       | 1015       |
| 2d_SalI      | AAGATGTATA | CATTAAAAAT | TAAGGAGTAT | AAAATCAAAA | AACCAACTGC | ATATATGGAT |
| 2d_Thai      | AAGATGTATA | CATTAAAAAT | TAAGGAGTAT | AAAATCAAAA | AACCAACTGC | ATATATGGAT |
| Conservation | *****      | *****      | *****      | *****      | *****      | *****      |
|              | .... ....  | .... ....  | .... ....  | .... ....  | .... ....  | .... ....  |
|              | 1025       | 1035       | 1045       | 1055       | 1065       | 1075       |
| 2d_SalI      | AAAATAAAGG | CTGTTTATAA | GTTAGCTAAT | GATACAATAT | GGAGAATAAA | AGTAGAATTA |
| 2d_Thai      | AAAATAAAGG | CTGTTTATAA | GTTAGCTAAT | GATACAATAT | GGAGAATAAA | AGTAGAATTA |
| Conservation | *****      | *****      | *****      | *****      | *****      | *****      |
|              | .... ....  | .... ....  | .... ....  | .... ....  | .... ....  | .... ....  |
|              | 1085       | 1095       | 1105       | 1115       | 1125       | 1135       |
| 2d_SalI      | AACTCAAATC | TTGATTCGGA | TACAACCGAC | TTTATCTAG  | AAGAATTTAA | ATACATTATA |
| 2d_Thai      | AACTCAAATC | TTGATTCGGA | TACAACCGAC | TTTATCTAG  | AAGAATTTAA | ATACATTATA |
| Conservation | *****      | *****      | *****      | *****      | *****      | *****      |
|              | .... ....  | .... ....  | .... ....  | .... ....  | .... ....  | .... ....  |
|              | 1145       | 1155       | 1165       | 1175       | 1185       | 1195       |
| 2d_SalI      | GAAAAGTATA | ATGGTCACAT | TGATAAAATT | AATTTGGGAA | CTTCTTATAT | AGATCATATT |
| 2d_Thai      | GAAAAGTATA | ATGGTCACAT | TGATAAAATT | AATTTGGGAA | CTTCTTATAT | AGATCATATT |
| Conservation | *****      | *****      | *****      | *****      | *****      | *****      |

|              |            |             |            |            |            |             |
|--------------|------------|-------------|------------|------------|------------|-------------|
|              | .... ....  | .... ....   | .... ....  | .... ....  | .... ....  | .... ....   |
|              | 1205       | 1215        | 1225       | 1235       | 1245       | 1255        |
| 2d_SalI      | CATGAACAAG | AAGGAAC TTT | GAATAACT   | AAAATAGAAA | TTATAACTTT | GTATTCTGTG  |
| 2d_Thai      | CATGAACAAG | AAGGAAC TTT | GAATAACT   | AAAATAGAAA | TTATAACTTT | GTATTCTGTG  |
| Conservation | *****      | *****       | *****      | *****      | *****      | *****       |
|              | .... ....  | .... ....   | .... ....  | .... ....  | .... ....  | .... ....   |
|              | 1265       | 1275        | 1285       | 1295       | 1305       | 1315        |
| 2d_SalI      | ATAGCTAATC | GTTACTACTGC | TTTTAAATTT | AGTTTAGAAC | ATATAAATAT | GTTTGAAAAT  |
| 2d_Thai      | ATAGCTAATC | GTTACTACTGC | TTTTAAATTT | AGTTTAGAAC | ATATAAATAT | GTTTGAAAAT  |
| Conservation | *****      | *****       | *****      | *****      | *****      | *****       |
|              | .... ....  | .... ....   | .... ....  | .... ....  | .... ....  | .... ....   |
|              | 1325       | 1335        | 1345       | 1355       | 1365       | 1375        |
| 2d_SalI      | ACATCCAAAA | GTAAGAACA   | GGTACTTTAT | AACTCTTTTA | GCAAATTTGA | GGATAGATTA  |
| 2d_Thai      | ACATCCAAAA | GTAAGAACA   | GGTACTTTAT | AACTCTTTTA | GCAAATTTGA | GGATAGATTA  |
| Conservation | *****      | *****       | *****      | *****      | *****      | *****       |
|              | .... ....  | .... ....   | .... ....  | .... ....  | .... ....  | .... ....   |
|              | 1385       | 1395        | 1405       | 1415       | 1425       | 1435        |
| 2d_SalI      | CAAAGAAAA  | TAAACGATCT  | TATTAATTCT | GAATTTCTA  | TATCAACCGT | TAAC TCTGTC |
| 2d_Thai      | CAAAGAAAA  | TAAACGATCT  | TATTAATTCT | GAATTTCTA  | TATCAACCGT | TAAC TCTGTC |
| Conservation | *****      | *****       | *****      | *****      | *****      | *****       |
|              | .... ....  | .... ....   | .... ....  | .... ....  | .... ....  | .... ....   |
|              | 1445       | 1455        | 1465       | 1475       | 1485       | 1495        |
| 2d_SalI      | ATTTTGGATT | CCGAAAAAAA  | TATACAATTA | TCAGAATCAT | TACTCAACTC | GAGTCTAAA   |
| 2d_Thai      | ATTTTGGATT | CCGAAAAAAA  | TATACAATTA | TCAGAATCAT | TACTCAACTC | GAGTCTAAA   |
| Conservation | *****      | *****       | *****      | *****      | *****      | *****       |
|              | .... ....  | .... ....   | .... ....  | .... ....  | .... ....  | .... ....   |
|              | 1505       | 1515        | 1525       | 1535       | 1545       | 1555        |
| 2d_SalI      | GAAATAGCAC | AACATGAAAT  | TAAATTAAAT | GCGGAAATG  | AAAAGAAAA  | AAAAGATTAT  |
| 2d_Thai      | GAAATAGCAC | AACATGAAAT  | TAAATTAAAT | GCGGAAATG  | AAAAGAAAA  | AAAAGATTAT  |
| Conservation | *****      | *****       | *****      | *****      | *****      | *****       |
|              | .... ....  | .... ....   | .... ....  | .... ....  | .... ....  | .... ....   |
|              | 1565       | 1575        | 1585       | 1595       | 1605       | 1615        |
| 2d_SalI      | GATCAAAAA  | TTATAAGAGC  | AAGAGAAACT | ATAAAAAAAT | CAAAGGAATT | AATTACATCT  |
| 2d_Thai      | GATCAAAAA  | TTATAAGAGC  | AAGAGAAACT | ATAAAAAAAT | CAAAGGAATT | AATTACATCT  |
| Conservation | *****      | *****       | *****      | *****      | *****      | *****       |
|              | .... ....  | .... ....   | .... ....  | .... ....  | .... ....  | .... ....   |
|              | 1625       | 1635        | 1645       | 1655       | 1665       | 1675        |
| 2d_SalI      | GTAAAAAACG | CATTTAAGTT  | AAGTTTAGAA | GAAAAGGAAA | AGATAGAAAA | GAAAGTAACA  |
| 2d_Thai      | GTAAAAAACG | CATTTAAGTT  | AAGTTTAGAA | GAAAAGGAAA | AGATAGAAAA | GAAAGTAACA  |
| Conservation | *****      | *****       | *****      | *****      | *****      | *****       |
|              | .... ....  | .... ....   | .... ....  | .... ....  | .... ....  | .... ....   |
|              | 1685       | 1695        | 1705       | 1715       | 1725       | 1735        |
| 2d_SalI      | GAAGCAAAAA | AATTGCCAAA  | CGCTCTAGAA | AGAGACAAAG | CATATTTAGA | CATTATGAGT  |
| 2d_Thai      | GAAGCAAAAA | AATTGCCAAA  | CGCTCTAGAA | AGAGACAAAG | CATATTTAGA | CATTATGAGT  |
| Conservation | *****      | *****       | *****      | *****      | *****      | *****       |
|              | .... ....  | .... ....   | .... ....  | .... ....  | .... ....  | .... ....   |
|              | 1745       | 1755        | 1765       | 1775       | 1785       | 1795        |
| 2d_SalI      | GAAATAAGAA | AAATTA AAAA | TAAGTTATCT | GATAATGCTA | GAAAGACAAC | CGAATTTACT  |
| 2d_Thai      | GAAATAAGAA | AAATTA AAAA | TAAGTTATCT | GATAATGCTA | GAAAGACAAC | CGAATTTACT  |
| Conservation | *****      | *****       | *****      | *****      | *****      | *****       |



|              |            |            |            |             |             |             |
|--------------|------------|------------|------------|-------------|-------------|-------------|
|              | .... ....  | .... ....  | .... ....  | .... ....   | .... ....   | .... ....   |
|              | 1805       | 1815       | 1825       | 1835        | 1845        | 1855        |
| 2d_SalI      | AAAAATCAA  | ATGCTTAAA  | AAAGGAAGTT | CAAGAATTAA  | ATACAAGTGT  | TAACAACATAT |
| 2d_Thai      | AAAAATCAA  | ATGCTTAAA  | AAAGGAAGTT | CAAGAATTAA  | ATACAAGTGT  | TAACAACATAT |
| Conservation | *****      | *****      | *****      | *****       | *****       | *****       |
|              | .... ....  | .... ....  | .... ....  | .... ....   | .... ....   | .... ....   |
|              | 1865       | 1875       | 1885       | 1895        | 1905        | 1915        |
| 2d_SalI      | GTGCAAGCAA | TAAAGGAACA | AAAAGAAAAA | GAAATTCGGA  | ATAATTCTTT  | GAAAGATGAA  |
| 2d_Thai      | GTGCAAGCAA | TAAAGGAACA | AAAAGAAAAA | GAAATTCGGA  | ATAATTCTTT  | GAAAGATGAA  |
| Conservation | *****      | *****      | *****      | *****       | *****       | *****       |
|              | .... ....  | .... ....  | .... ....  | .... ....   | .... ....   | .... ....   |
|              | 1925       | 1935       | 1945       | 1955        | 1965        | 1975        |
| 2d_SalI      | ATAAAAAAGT | TTTTGGAATA | TATACCTAAT | AACAGAGAAA  | AAATAAAAAGA | ATTAATTACC  |
| 2d_Thai      | ATAAAAAAGT | TTTTGGAATA | TATACCTAAT | AACAGAGAAA  | AAATAAAAAGA | ATTAATTACC  |
| Conservation | *****      | *****      | *****      | *****       | *****       | *****       |
|              | .... ....  | .... ....  | .... ....  | .... ....   | .... ....   | .... ....   |
|              | 1985       | 1995       | 2005       | 2015        | 2025        | 2035        |
| 2d_SalI      | AAAAAGAATG | AAGTGCAACA | ATATATTTCC | AAAATTGAAG  | AATTAATTAA  | AGACGCACAC  |
| 2d_Thai      | AAAAAGAATG | AAGTGCAACA | ATATATTTCC | AAAATTGAAG  | AATTAATTAA  | AGACGCACAC  |
| Conservation | *****      | *****      | *****      | *****       | *****       | *****       |
|              | .... ....  | .... ....  | .... ....  | .... ....   | .... ....   | .... ....   |
|              | 2045       | 2055       | 2065       | 2075        | 2085        | 2095        |
| 2d_SalI      | TTTGGTGTAG | AAGAATTTAC | AGCCAAAAAA | ACAGAATTGC  | AAAATCAGGT  | AAATTCAATA  |
| 2d_Thai      | TTTGGTGTAG | AAGAATTTAC | AGCCAAAAAA | ACAGAATTGC  | AAAATCAGGT  | AAATTCAATA  |
| Conservation | *****      | *****      | *****      | *****       | *****       | *****       |
|              | .... ....  | .... ....  | .... ....  | .... ....   | .... ....   | .... ....   |
|              | 2105       | 2115       | 2125       | 2135        | 2145        | 2155        |
| 2d_SalI      | ATTGATGCAT | TTTATAAAGA | AGACCTACAA | TTATTTTGTAG | ACAATTTATC  | AAAATCTTAT  |
| 2d_Thai      | ATTGATGCAT | TTTATAAAGA | AGACCTACAA | TTATTTTGTAG | ACAATTTATC  | AAAATCTTAT  |
| Conservation | *****      | *****      | *****      | *****       | *****       | *****       |
|              | .... ....  | .... ....  | .... ....  | .... ....   | .... ....   | .... ....   |
|              | 2165       | 2175       | 2185       | 2195        | 2205        | 2215        |
| 2d_SalI      | GATGAAAATC | AAGTTTTAGA | GAAGGAAGCT | GATACTACAG  | AAAAGATTGA  | AGAACTTCAC  |
| 2d_Thai      | GATGAAAATC | AAGTTTTAGA | GAAGGAAGCT | GATACTACAG  | AAAAGATTGA  | AGAACTTCAC  |
| Conservation | *****      | *****      | *****      | *****       | *****       | *****       |
|              | .... ....  | .... ....  | .... ....  | .... ....   | .... ....   | .... ....   |
|              | 2225       | 2235       | 2245       | 2255        | 2265        | 2275        |
| 2d_SalI      | AAAAGAACCA | AAATGGATTA | TGAAAAACTT | CTAAATATGA  | AATGTGATGA  | TATACCCGAA  |
| 2d_Thai      | AAAAGAACCA | AAATGGATTA | TGAAAAACTT | CTAAATATGA  | AATGTGATGA  | TATACCCGAA  |
| Conservation | *****      | *****      | *****      | *****       | *****       | *****       |
|              | .... ....  | .... ....  | .... ....  | .... ....   | .... ....   | .... ....   |
|              | 2285       | 2295       | 2305       | 2315        | 2325        | 2335        |
| 2d_SalI      | ATAATAAAAA | AGTTGAATAC | AGAATTAAAT | AATCTCAAAA  | ATTTAGAAAA  | AAATATTGTA  |
| 2d_Thai      | ATAATAAAAA | AGTTGAATAC | AGAATTAAAT | AATCTCAAAA  | ATTTAGAAAA  | AAATATTGTA  |
| Conservation | *****      | *****      | *****      | *****       | *****       | *****       |
|              | .... ....  | .... ....  | .... ....  | .... ....   | .... ....   | .... ....   |
|              | 2345       | 2355       | 2365       | 2375        | 2385        | 2395        |
| 2d_SalI      | GAAGAACAGA | CTAAAAACAT | TAATAAATAT | GTTTCAGATT  | CATTTGATAA  | CCTAACTGAT  |
| 2d_Thai      | GAAGAACAGA | CTAAAAACAT | TAATAAATAT | GTTTCAGATT  | CATTTGATAA  | CCTAACTGAT  |
| Conservation | *****      | *****      | *****      | *****       | *****       | *****       |

|              |            |            |            |             |             |            |
|--------------|------------|------------|------------|-------------|-------------|------------|
|              | .... ....  | .... ....  | .... ....  | .... ....   | .... ....   | .... ....  |
|              | 2405       | 2415       | 2425       | 2435        | 2445        | 2455       |
| 2d_SalI      | GAAATGAACC | GTTTAAGAAA | TAGCTTGAAT | GAATATAAGC  | AGGATGAAGG  | TAAGCTCCAA |
| 2d_Thai      | GAAATGAACC | GTTTAAGAAA | TAGCTTGAAT | GAATATAAGC  | AGGATGAAGG  | TAAGCTCCAA |
| Conservation | *****      | *****      | *****      | *****       | *****       | *****      |
|              | .... ....  | .... ....  | .... ....  | .... ....   | .... ....   | .... ....  |
|              | 2465       | 2475       | 2485       | 2495        | 2505        | 2515       |
| 2d_SalI      | ACATATAAAG | GTAGTATAAA | TGAAAGAAAA | GACAAATTCC  | TCAATACTTC  | AAGCGAAAAA |
| 2d_Thai      | ACATATAAAG | GTAGTATAAA | TGAAAGAAAA | GACAAATTCC  | TCAATACTTC  | AAGCGAAAAA |
| Conservation | *****      | *****      | *****      | *****       | *****       | *****      |
|              | .... ....  | .... ....  | .... ....  | .... ....   | .... ....   | .... ....  |
|              | 2525       | 2535       | 2545       | 2555        | 2565        | 2575       |
| 2d_SalI      | GAGGAAGATA | TTCCAGAGGG | ACAAAATATT | TATGATGAAT  | ATAAAAAGTCA | TAAAGATCTT |
| 2d_Thai      | GAGGAAGATA | TTCCAGAGGG | ACAAAATATT | TATGATGAAT  | ATAAAAAGTCA | TAAAGATCTT |
| Conservation | *****      | *****      | *****      | *****       | *****       | *****      |
|              | .... ....  | .... ....  | .... ....  | .... ....   | .... ....   | .... ....  |
|              | 2585       | 2595       | 2605       | 2615        | 2625        | 2635       |
| 2d_SalI      | ATGGTTAACA | AAGAACTTAA | ATTATCCAGT | GATATTAATG  | AATTC AAGGA | AAATATAAAA |
| 2d_Thai      | ATGGTTAACA | AAGAACTTAA | ATTATCCAGT | GATATTAATG  | AATTC AAGGA | AAATATAAAA |
| Conservation | *****      | *****      | *****      | *****       | *****       | *****      |
|              | .... ....  | .... ....  | .... ....  | .... ....   | .... ....   | .... ....  |
|              | 2645       | 2655       | 2665       | 2675        | 2685        | 2695       |
| 2d_SalI      | AAAGTCCAAA | CAAAAATAGA | GGCCTTCAGC | AGTGT AATGC | AAAAATTAGG  | AGCGAACGCC |
| 2d_Thai      | AAAGTCCAAA | CAAAAATAGA | GGCCTTCAGC | AGTGT AATGC | AAAAATTAGG  | AGCGAACGCC |
| Conservation | *****      | *****      | *****      | *****       | *****       | *****      |
|              | .... ....  | .... ....  | .... ....  | .... ....   | .... ....   | .... ....  |
|              | 2705       | 2715       | 2725       | 2735        | 2745        | 2755       |
| 2d_SalI      | GATGAACAAC | ATCAAGAAAC | TATAAATTCT | TTGAAGAACT  | TTAATACTAA  | AATCGAAGGT |
| 2d_Thai      | GATGAACAAC | ATCAAGAAAC | TATAAATTCT | TTGAAGAACT  | TTAATACTAA  | AATCGAAGGT |
| Conservation | *****      | *****      | *****      | *****       | *****       | *****      |
|              | .... ....  | .... ....  | .... ....  | .... ....   | .... ....   | .... ....  |
|              | 2765       | 2775       | 2785       | 2795        | 2805        | 2815       |
| 2d_SalI      | TTAAAATTAA | GTGAACTTGA | AGGTGAATTT | AAAATTAACA  | ATGAATCAGC  | TGCCAAATTA |
| 2d_Thai      | TTAAAATTAA | GTGAACTTGA | AGGTGAATTT | AAAATTAACA  | ATGAATCAGC  | TGCCAAATTA |
| Conservation | *****      | *****      | *****      | *****       | *****       | *****      |
|              | .... ....  | .... ....  | .... ....  | .... ....   | .... ....   | .... ....  |
|              | 2825       | 2835       | 2845       | 2855        | 2865        | 2875       |
| 2d_SalI      | TATAATCAAA | TTGAAAATAC | AATGAAAAAT | ATAGACACAA  | TTAAATCCTT  | AAATTATACT |
| 2d_Thai      | TATAATCAAA | TTGAAAATAC | AATGAAAAAT | ATAGACACAA  | TTAAATCCTT  | AAATTATACT |
| Conservation | *****      | *****      | *****      | *****       | *****       | *****      |
|              | .... ....  | .... ....  | .... ....  | .... ....   | .... ....   | .... ....  |
|              | 2885       | 2895       | 2905       | 2915        | 2925        | 2935       |
| 2d_SalI      | AGAAACAGCG | CCAACAATAG | CAGAGAATTA | ATGGTAAAAA  | TAGTAAAAGA  | TAAAAATGAT |
| 2d_Thai      | AGAAACAGCG | CCAACAATAG | CAGAGAATTA | ATGGTAAAAA  | TAGTAAAAGA  | TAAAAATGAT |
| Conservation | *****      | *****      | *****      | ****:*****  | *****       | *****      |
|              | .... ....  | .... ....  | .... ....  | .... ....   | .... ....   | .... ....  |
|              | 2945       | 2955       | 2965       | 2975        | 2985        | 2995       |
| 2d_SalI      | TTAATAAAAA | AACTAGATCA | ACAGTCTGAA | GAAATAAAAC  | AATACACATT  | AATAGAAGAA |
| 2d_Thai      | TTAATAAAAA | AACTAGATCA | ACAGTCTGAA | GAAATAAAAC  | AATACACATT  | AATAGAAGAA |
| Conservation | *****      | *****      | *****      | *****       | *****       | *****      |

|              |            |             |             |            |            |             |
|--------------|------------|-------------|-------------|------------|------------|-------------|
|              | .... ....  | .... ....   | .... ....   | .... ....  | .... ....  | .... ....   |
|              | 3005       | 3015        | 3025        | 3035       | 3045       | 3055        |
| 2d_SalI      | AAAGAAAAGT | CACCCCTTCT  | AAGCGCTTTA  | AATGAAGAAC | AAAATCATGT | AGAAAAGTGAA |
| 2d_Thai      | GAAGAAAAGT | CACCCCTTCT  | AAGCGCTTTA  | AATGAAGAAC | AAAATCATGT | AGAAAAGTGAA |
| Conservation | .*****     | *****       | *****       | *****      | *****      | *****       |
|              |            |             |             |            |            |             |
|              | .... ....  | .... ....   | .... ....   | .... ....  | .... ....  | .... ....   |
|              | 3065       | 3075        | 3085        | 3095       | 3105       | 3115        |
| 2d_SalI      | ATTCCTAAAG | AGTCGATAGA  | CAAATTA AAC | ACAGAAATAA | ATGCTATACT | GGAATATTAC  |
| 2d_Thai      | ATTCCTAAAG | AGTCGATAGA  | CAAATTA AAC | ACAGAAATAA | ATGCTATACT | GGAATATTAC  |
| Conservation | *****      | *****       | *****       | *****      | *****      | *****       |
|              |            |             |             |            |            |             |
|              | .... ....  | .... ....   | .... ....   | .... ....  | .... ....  | .... ....   |
|              | 3125       | 3135        | 3145        | 3155       | 3165       | 3175        |
| 2d_SalI      | AACAGTTCAA | AGGGTAATTT  | TAATGAGGAC  | ACGGAAATAA | AATTGGAAAA | GTTAGACAAT  |
| 2d_Thai      | AACAGTTCAA | AGGGTAATTT  | TAATGAGGAC  | ACGGAAATAA | AATTGGAAAA | GTTAGACAAT  |
| Conservation | *****      | *****       | *****       | *****      | *****      | *****       |
|              |            |             |             |            |            |             |
|              | .... ....  | .... ....   | .... ....   | .... ....  | .... ....  | .... ....   |
|              | 3185       | 3195        | 3205        | 3215       | 3225       | 3235        |
| 2d_SalI      | TTTAAACTC  | AATGTGATAA  | TATTAAGCAA  | GAAATAGAAA | CATTAAACAC | TAAATATAAA  |
| 2d_Thai      | TTTAAACTC  | AATGTGATAA  | TATTAAGCAA  | GAAATAGAAA | CATTAAACAC | TAAATATAAA  |
| Conservation | *****      | *****       | *****       | *****      | *****      | *****       |
|              |            |             |             |            |            |             |
|              | .... ....  | .... ....   | .... ....   | .... ....  | .... ....  | .... ....   |
|              | 3245       | 3255        | 3265        | 3275       | 3285       | 3295        |
| 2d_SalI      | GTGTTAGAAA | AAAGGATAGA  | CACCCTAATT  | GATGAACAAC | ATGCTAAAAT | TGTGACGTTG  |
| 2d_Thai      | GTGTTAGAAA | AAAGGATAGA  | CACCCTAATT  | GATGAACAAC | ATGCTAAAAT | TGTGACGTTG  |
| Conservation | *****      | *****       | *****       | *****      | *****      | *****       |
|              |            |             |             |            |            |             |
|              | .... ....  | .... ....   | .... ....   | .... ....  | .... ....  | .... ....   |
|              | 3305       | 3315        | 3325        | 3335       | 3345       | 3355        |
| 2d_SalI      | ACAGATAAGC | ACATAACAAC  | CAAAGATAAT  | ATGATTAATC | AAAAGATTGA | ACATAGCACA  |
| 2d_Thai      | ACAGATAAGC | ACATAACAAC  | CAAAGATAAT  | ATGATTAATC | AAAAGATTGA | ACATAGCACA  |
| Conservation | *****      | *****       | *****       | *****      | *****      | *****       |
|              |            |             |             |            |            |             |
|              | .... ....  | .... ....   | .... ....   | .... ....  | .... ....  | .... ....   |
|              | 3365       | 3375        | 3385        | 3395       | 3405       | 3415        |
| 2d_SalI      | AAATCGCTAG | ATGATATGAA  | AACTAAGTTG  | AATTCTCTCA | AATTTAACGA | TGATATCAGA  |
| 2d_Thai      | AAATCGCTAG | ATGATATGAA  | AACTAAGTTG  | AATTCTCTCA | AATTTAACGA | TGATATCAGA  |
| Conservation | *****      | *****       | *****       | *****      | *****      | *****       |
|              |            |             |             |            |            |             |
|              | .... ....  | .... ....   | .... ....   | .... ....  | .... ....  | .... ....   |
|              | 3425       | 3435        | 3445        | 3455       | 3465       | 3475        |
| 2d_SalI      | AAGAATGAAA | ATGTCGAAAT  | TCAAGGTAAA  | ATACAGGAAT | TTGAAAAAAT | GGTTCAAACT  |
| 2d_Thai      | AAGAATGAAA | ATGTCGAAAT  | TCAAGGTAAA  | ATACAGGAAT | TTGAAAAAAT | GGTTCAAACT  |
| Conservation | *****      | *****       | *****       | *****      | *****      | *****       |
|              |            |             |             |            |            |             |
|              | .... ....  | .... ....   | .... ....   | .... ....  | .... ....  | .... ....   |
|              | 3485       | 3495        | 3505        | 3515       | 3525       | 3535        |
| 2d_SalI      | ATAGAGGAAA | GTATAAATAA  | AAATAAAACT  | AAAATATATG | AAATTAAAGG | AGTATACGAT  |
| 2d_Thai      | ATAGAGGAAA | GTATAAATAA  | AAATAAAACT  | AAAATATATG | AAATTAAAGG | AGTATACGAT  |
| Conservation | *****      | *****       | *****       | *****      | *****      | *****       |
|              |            |             |             |            |            |             |
|              | .... ....  | .... ....   | .... ....   | .... ....  | .... ....  | .... ....   |
|              | 3545       | 3555        | 3565        | 3575       | 3585       | 3595        |
| 2d_SalI      | GTGTACAAGG | GTGAATTC AA | TGAAGAAAAA  | AATAAAAGCA | CAAAAATCGT | AGAAAAA AAA |
| 2d_Thai      | GTGTACAAGG | GTGAATTC AA | TGAAGAAAAA  | AATAAAAGCA | CAAAAATCGT | AGAAAAA AAA |
| Conservation | *****      | *****       | *****       | *****      | *****      | *****       |

|              |            |            |            |            |            |            |
|--------------|------------|------------|------------|------------|------------|------------|
|              | .... ....  | .... ....  | .... ....  | .... ....  | .... ....  | .... ....  |
|              | 3605       | 3615       | 3625       | 3635       | 3645       | 3655       |
| 2d_SalI      | AATAGCATGG | AAAAAGTTTA | TAACAAAATG | GAAGATACTC | TTAAAAAATT | AGAAGATATA |
| 2d_Thai      | AATAGCATGG | AAAAAGTTTA | TAACAAAATG | GAAGATACTC | TTAAAAAATT | AGAAGATATA |
| Conservation | *****      | *****      | *****      | *****      | *****      | *****      |
|              | .... ....  | .... ....  | .... ....  | .... ....  | .... ....  | .... ....  |
|              | 3665       | 3675       | 3685       | 3695       | 3705       | 3715       |
| 2d_SalI      | GATAACGAAA | AAAATATATT | AAATGAAATA | GAAAAGGCTG | AAGTACTATA | CAGGAAAGTT |
| 2d_Thai      | GATAACGAAA | AAAATATATT | AAATGAAATA | GAAAAGGCTG | AAGTACTATA | CAGGAAAGTT |
| Conservation | *****      | *****      | *****      | *****      | *****      | *****      |
|              | .... ....  | .... ....  | .... ....  | .... ....  | .... ....  | .... ....  |
|              | 3725       | 3735       | 3745       | 3755       | 3765       | 3775       |
| 2d_SalI      | TTCATTGATA | ATACTGTTCA | TATGATGGAT | AATGAAACTA | AAAAGTCTAA | AAATTTGATG |
| 2d_Thai      | TTCATTGATA | ATACTGTTCA | TATGATGGAT | AATGAAACTA | AAAAGTCTAA | AAATTTGATG |
| Conservation | *****      | *****      | *****      | *****      | *****      | *****      |
|              | .... ....  | .... ....  | .... ....  | .... ....  | .... ....  | .... ....  |
|              | 3785       | 3795       | 3805       | 3815       | 3825       | 3835       |
| 2d_SalI      | GACCAAATCG | AATTGTCTAA | AAGAGAAATT | GAGGAAACAA | AGAAGCAAAT | GCTTGAATAC |
| 2d_Thai      | GACCAAATCG | AATTGTCTAA | AAGAGAAATT | GAGGAAACAA | AGAAGCAAAT | GCTTGAATAC |
| Conservation | *****      | *****      | *****      | *****      | *****      | *****      |
|              | .... ....  | .... ....  | .... ....  | .... ....  | .... ....  | .... ....  |
|              | 3845       | 3855       | 3865       | 3875       | 3885       | 3895       |
| 2d_SalI      | AAAAATGATG | AGGTATCTAA | TTATGATTAT | ATGAAATATT | ACAACCAGGC | TACAGAGAGT |
| 2d_Thai      | AAAAATGATG | AGGTATCTAA | TTATGATTAT | ATGAAATATT | ACAACCAGGC | TACAGAGAGT |
| Conservation | *****      | *****      | *****      | *****      | *****      | *****      |
|              | .... ....  | .... ....  | .... ....  | .... ....  | .... ....  | .... ....  |
|              | 3905       | 3915       | 3925       | 3935       | 3945       | 3955       |
| 2d_SalI      | AATGCTAAAA | TAAAAGAAAC | TTTTAAAAAT | GCTACAGATA | AGAAAAGAAA | GGCTGAAAAT |
| 2d_Thai      | AATGCTAAAA | TAAAAGAAAC | TTTTAAAAAT | GCTACAGATA | AGAAAAGAAA | GGCTGAAAAT |
| Conservation | *****      | *****      | *****      | *****      | *****      | *****      |
|              | .... ....  | .... ....  | .... ....  | .... ....  | .... ....  | .... ....  |
|              | 3965       | 3975       | 3985       | 3995       | 4005       | 4015       |
| 2d_SalI      | ATCGAAAAAG | TAAGTGAAAT | CGATGACATT | AAAAACCAAG | TTAATCATAA | TTTACATCAG |
| 2d_Thai      | ATCGAAAAAG | TAAGTGAAAT | CGATGACATT | AAAAACCAAG | TTAATCATAA | TTTACATCAG |
| Conservation | *****      | *****      | *****      | *****      | *****      | *****      |
|              | .... ....  | .... ....  | .... ....  | .... ....  | .... ....  | .... ....  |
|              | 4025       | 4035       | 4045       | 4055       | 4065       | 4075       |
| 2d_SalI      | ATCCAATCAG | AAAATAGTTC | TATAGAGGAG | ATGTTAAAAC | AAATTAATAA | TATGAAAGAT |
| 2d_Thai      | ATCCAATCAG | AAAATAGTTC | TATAGAGGAG | ATGTTAAAAC | AAATTAATAA | TATGAAAGAT |
| Conservation | *****      | *****      | *****      | *****      | *****      | *****      |
|              | .... ....  | .... ....  | .... ....  | .... ....  | .... ....  | .... ....  |
|              | 4085       | 4095       | 4105       | 4115       | 4125       | 4135       |
| 2d_SalI      | TTATTAAAAA | CGAACAGTTC | TAAAGGAATA | TCGGATACAG | TATTAAGTAG | TACCAAAAAT |
| 2d_Thai      | TTATTAAAAA | CGAACAGTTC | TAAAGGAATA | TCGGATACAG | TATTAAGTAG | TACCAAAAAT |
| Conservation | *****      | *****      | *****      | *****      | *****      | *****      |
|              | .... ....  | .... ....  | .... ....  | .... ....  | .... ....  | .... ....  |
|              | 4145       | 4155       | 4165       | 4175       | 4185       | 4195       |
| 2d_SalI      | GCAGAAGAAT | TTGGCAAACA | AGCAATAAGT | GAATTTAATA | AAACGAATGA | TGTAATACAA |
| 2d_Thai      | GCAGAAGAAT | TTGGCAAACA | AGCAATAAGT | GAATTTAATA | AAACGAATGA | TGTAATACAA |
| Conservation | *****      | *****      | *****      | *****      | *****      | *****      |

|              |            |            |            |            |            |            |
|--------------|------------|------------|------------|------------|------------|------------|
|              | .... ....  | .... ....  | .... ....  | .... ....  | .... ....  | .... ....  |
|              | 4205       | 4215       | 4225       | 4235       | 4245       | 4255       |
| 2d_SalI      | GCAATCAGAG | ATTTGATAAC | TAAGGCTGAA | GCACATAAAA | ATTTAATCAA | TATAAATTTA |
| 2d_Thai      | GCAATCAGAG | ATTTGATAAC | TAAGGCTGAA | GCACATAAAA | ATTTAATCAA | TATAAATTTA |
| Conservation | *****      | *****      | *****      | *****      | *****      | *****      |
|              | .... ....  | .... ....  | .... ....  | .... ....  | .... ....  | .... ....  |
|              | 4265       | 4275       | 4285       | 4295       | 4305       | 4315       |
| 2d_SalI      | GAAGATGAAA | AAATAAATGC | CGAAGTGAAA | GAAATTGAAA | AAATTAAGGA | ACAAATTGCC |
| 2d_Thai      | GAAGATGAAA | AAATAAATGC | CGAAGTGAAA | GAAATTGAAA | AAATTAAGGA | ACAAATTGCC |
| Conservation | *****      | *****      | *****      | *****      | *****      | *****      |
|              | .... ....  | .... ....  | .... ....  | .... ....  | .... ....  | .... ....  |
|              | 4325       | 4335       | 4345       | 4355       | 4365       | 4375       |
| 2d_SalI      | AATAAGAAAG | AAGAAATAGA | ATCCCATCTG | AGCAAGGCAA | AAGAATTTAA | AGAAAAATGT |
| 2d_Thai      | AATAAGAAAG | AAGAAATAGA | ATCCCATCTG | AGCAAGGCAA | AAGAATTTAA | AGAAAAATGT |
| Conservation | *****      | *****      | *****      | *****      | *****      | *****      |
|              | .... ....  | .... ....  | .... ....  | .... ....  | .... ....  | .... ....  |
|              | 4385       | 4395       | 4405       | 4415       | 4425       | 4435       |
| 2d_SalI      | TCCTCAGAAA | CAAGTAACGC | CAAAAGAGGT | AAAAGTAAAA | TAGAATTTTT | GCAAAGTCGT |
| 2d_Thai      | TCCTCAGAAA | CAAGTAACGC | CAAAAGAGGT | AAAAGTAAAA | TAGAATTTTT | GCAAAGTCGT |
| Conservation | *****      | *****      | *****      | *****      | *****      | *****      |
|              | .... ....  | .... ....  | .... ....  | .... ....  | .... ....  | .... ....  |
|              | 4445       | 4455       | 4465       | 4475       | 4485       | 4495       |
| 2d_SalI      | GAAGGCAGTT | CGGAAGAGGT | AGATATGAAG | GAGATAGAAG | AAAATATTAC | CAAAGCAGAA |
| 2d_Thai      | GAAGGCAGTT | CGGAAGAGGT | AGATATGAAG | GAGATAGAAG | AAAATATTAC | CAAAGCAGAA |
| Conservation | *****      | *****      | *****      | *****      | *****      | *****      |
|              | .... ....  | .... ....  | .... ....  | .... ....  | .... ....  | .... ....  |
|              | 4505       | 4515       | 4525       | 4535       | 4545       | 4555       |
| 2d_SalI      | GGATATTTAA | ATCAAGCCAT | TGCTGCAGAA | ACAGAAGCTA | ATAAGAATGT | AGAATTGTTC |
| 2d_Thai      | GGATATTTAA | ATCAAGCCAT | TGCTGCAGAA | ACAGAAGCTA | ATAAGAATGT | AGAATTGTTC |
| Conservation | *****      | *****      | *****      | *****      | *****      | *****      |
|              | .... ....  | .... ....  | .... ....  | .... ....  | .... ....  | .... ....  |
|              | 4565       | 4575       | 4585       | 4595       | 4605       | 4615       |
| 2d_SalI      | GGTGAACTTC | AAAAAATAT  | CTGTGACATT | TTCGATGAAT | CATCAATTTT | AGGAATAGAG |
| 2d_Thai      | GGTGAACTTC | AAAAAATAT  | CTGTGACATT | TTCGATGAAT | CATCAATTTT | AGGAATAGAG |
| Conservation | *****      | *****      | *****      | *****      | *****      | *****      |
|              | .... ....  | .... ....  | .... ....  | .... ....  | .... ....  | .... ....  |
|              | 4625       | 4635       | 4645       | 4655       | 4665       | 4675       |
| 2d_SalI      | ACTACATCAA | AGAAAAAAT  | TAATAAAGCA | ACAGAAATAA | TGGAAGAAAT | TAAAAGGAAA |
| 2d_Thai      | ACTACATCAA | AGAAAAAAT  | TAATAAAGCA | ACAGAAATAA | TGGAAGAAAT | TAAAAGGAAA |
| Conservation | *****      | *****      | *****      | *****      | *****      | *****      |
|              | .... ....  | .... ....  | .... ....  | .... ....  | .... ....  | .... ....  |
|              | 4685       | 4695       | 4705       | 4715       | 4725       | 4735       |
| 2d_SalI      | AATTTTGAAA | TTCAAGGCGA | GGTGAAAATT | TTCCATGAAA | CACTCGTTAA | ATTGAAAGAA |
| 2d_Thai      | AATTTTGAAA | TTCAAGGCGA | GGTGAAAATT | TTCCATGAAA | CACTCGTTAA | ATTGAAAGAA |
| Conservation | *****      | *****      | *****      | *****      | *****      | *****      |
|              | .... ....  | .... ....  | .... ....  | .... ....  | .... ....  | .... ....  |
|              | 4745       | 4755       | 4765       | 4775       | 4785       | 4795       |
| 2d_SalI      | ACACACCCTG | ATAACAACGT | AGATGCTGAA | CTTAACAATG | CGAAATCGAC | CAATGCAAAT |
| 2d_Thai      | ACACACCCTG | ATAACAACGT | AGATGCTGAA | CTTAACAATG | CGAAATCGAC | CAATGCAAAT |
| Conservation | *****      | *****      | *****      | *****      | *****      | *****      |

|              |            |            |             |            |            |             |
|--------------|------------|------------|-------------|------------|------------|-------------|
|              | .... ....  | .... ....  | .... ....   | .... ....  | .... ....  | .... ....   |
|              | 4805       | 4815       | 4825        | 4835       | 4845       | 4855        |
| 2d_SalI      | GTACTTATAC | AAACTAACCT | AGAAATGGTG  | GAACATAACT | TATCCGTAAT | AGCTAAAATT  |
| 2d_Thai      | GTACTTATAC | AAACTAACCT | AGAAATGGTG  | GAACATAACT | TATCCGTAAT | AGCTAAAATT  |
| Conservation | *****      | *****      | *****       | *****      | *****      | *****       |
|              |            |            |             |            |            |             |
|              | .... ....  | .... ....  | .... ....   | .... ....  | .... ....  | .... ....   |
|              | 4865       | 4875       | 4885        | 4895       | 4905       | 4915        |
| 2d_SalI      | AAACAGGAGG | GAGAAAATAT | ATATAATAGA  | GCCTCATCTA | CGATAAATTC | CATGACAGAA  |
| 2d_Thai      | AAACAGGAGG | GAGAAAATAT | ATATAATAGA  | GCCTCATCTA | CGATAAATTC | CATGACAGAA  |
| Conservation | *****      | *****      | *****       | *****      | *****      | *****       |
|              |            |            |             |            |            |             |
|              | .... ....  | .... ....  | .... ....   | .... ....  | .... ....  | .... ....   |
|              | 4925       | 4935       | 4945        | 4955       | 4965       | 4975        |
| 2d_SalI      | ATCTCCAAA  | ATACTGAAA  | AAAAACATTA  | GACAAGGCAA | AAAGTGACGA | ATCTAAATAT  |
| 2d_Thai      | ATCTCCAAA  | ATACTGAAA  | AAAAACATTA  | GACAAGGCAA | AAAGTGACGA | ATCTAAATAT  |
| Conservation | *****      | *****      | *****       | *****      | *****      | *****       |
|              |            |            |             |            |            |             |
|              | .... ....  | .... ....  | .... ....   | .... ....  | .... ....  | .... ....   |
|              | 4985       | 4995       | 5005        | 5015       | 5025       | 5035        |
| 2d_SalI      | ATATCCTATT | TAACCAAAT  | AACTTCAGAA  | AGAGATCTAA | TCATTGAAGA | AAGGAATAAA  |
| 2d_Thai      | ATATCCTATT | TAACCAAAT  | AACTTCAGAA  | AGAGATCTAA | TCATTGAAGA | AAGGAATAAA  |
| Conservation | *****      | *****      | *****       | *****      | *****      | *****       |
|              |            |            |             |            |            |             |
|              | .... ....  | .... ....  | .... ....   | .... ....  | .... ....  | .... ....   |
|              | 5045       | 5055       | 5065        | 5075       | 5085       | 5095        |
| 2d_SalI      | CTAAATGGTA | TAAGCCCAA  | TATAATAAGT  | ATAGAAAAGG | AATTGAATAA | AGCCAGAAAG  |
| 2d_Thai      | CTAAATGGTA | TAAGCCCAA  | TATAATAAGT  | ATAGAAAAGG | AATTGAATAA | AGCCAGAAAG  |
| Conservation | *****      | *****      | *****       | *****      | *****      | *****       |
|              |            |            |             |            |            |             |
|              | .... ....  | .... ....  | .... ....   | .... ....  | .... ....  | .... ....   |
|              | 5105       | 5115       | 5125        | 5135       | 5145       | 5155        |
| 2d_SalI      | GATTACGAAA | TTGGACTTTT | GCAAAAAGATA | GATGAAATAG | GCAAAAACAG | AAAAAAAAGAA |
| 2d_Thai      | GATTACGAAA | TTGGACTTTT | GCAAAAAGATA | GATGAAATAG | GCAAAAACAA | AAAAAAAAGAA |
| Conservation | *****      | *****      | *****       | *****      | *****      | *****       |
|              |            |            |             |            |            |             |
|              | .... ....  | .... ....  | .... ....   | .... ....  | .... ....  | .... ....   |
|              | 5165       | 5175       | 5185        | 5195       | 5205       | 5215        |
| 2d_SalI      | TATG-ATTG  | ACAAAAGAAT | CAATAAAATT  | AACATTGAGC | AACTTTTCTT | CCCATTTCAA  |
| 2d_Thai      | TATTGATTG  | ACAAAAGAAT | CAATAAAATT  | AACATTGAGC | AACTTTTCTT | CCCATTTCAA  |
| Conservation | ***. ****  | *****      | *****       | *****      | *****      | *****       |
|              |            |            |             |            |            |             |
|              | .... ....  | .... ....  | .... ....   | .... ....  | .... ....  | .... ....   |
|              | 5225       | 5235       | 5245        | 5255       | 5265       | 5275        |
| 2d_SalI      | AGGATTTGAT | TTAAAGGAAT | ATGTCTTTAA  | TAAAAATATA | AATGACTATG | AACAAAAGAT  |
| 2d_Thai      | AGGATTTGAT | TTAAAGGAAT | ATGTCTTTAA  | TAAAAATATA | AATGACTATG | AACAAAAGAT  |
| Conservation | *****      | *****      | *****       | *****      | *****      | *****       |
|              |            |            |             |            |            |             |
|              | .... ....  | .... ....  | .... ....   | .... ....  | .... ....  | .... ....   |
|              | 5285       | 5295       | 5305        | 5315       | 5325       | 5335        |
| 2d_SalI      | GAAAGAAATA | CATGACAAAT | ATGACAAATC  | GATAAATAAA | ATTAGTAAAA | ACTTGAAAAA  |
| 2d_Thai      | GAAAGAAATA | CATGACAAAT | ATGACAAATC  | GATAAATAAA | ATTAGTAAAA | ACTTGAAAAA  |
| Conservation | *****      | *****      | *****       | *****      | *****      | *****       |
|              |            |            |             |            |            |             |
|              | .... ....  | .... ....  | .... ....   | .... ....  | .... ....  | .... ....   |
|              | 5345       | 5355       | 5365        | 5375       | 5385       | 5395        |
| 2d_SalI      | GGCTGAAGAG | GATAATACAA | ACTATACCCT  | AGCGAATGAG | CTGAGGAAAG | AAGCGCAACA  |
| 2d_Thai      | GGCTGAAGAG | GATAATACAA | ACTATACCCT  | AGCGAATGAG | CTGAGGAAAG | AAGCGCAACA  |
| Conservation | *****      | *****      | *****       | *****      | *****      | *****       |

```

      ....|....| ....|....| ....|....| ....|....| ....|....| ....|....|
      5405      5415      5425      5435      5445      5455
2d_SalI  AGAAAAAGCA GAACCTACAA ATATACAAGA AGAAGTAAAT AAATATTTAA GGGATATAAA
2d_Thai  AGAAAAAGCA GAACCTACAA ATATACAAGA AGAAGTAAAT AAATATTTAA GGGATATAAA
Conservation *****
      ....|....| ....|....| ....|....| ....|....| ....|....| ....|....|
      5465      5475      5485      5495      5505      5515
2d_SalI  AAAATGGGAA TCATTCAGAT TTATACTTGA TATGAAAGAC AATTTAAGTA ATATAAATAC
2d_Thai  AAAATGGGAA TCATTCAGAT TTATACTTGA TATGAAAGAC AATTTAAGTA ATATAAATAC
Conservation *****
      ....|....| ....|....| ....|....| ....|....| ....|....| ....|....|
      5525      5535      5545      5555      5565      5575
2d_SalI  ACTGATTAAA CAAGAAGAAT TAAAGGTTAA TGATGGATAT GAATACATTA AACAAATTAGT
2d_Thai  ACTGATTAAA CAAGAAGAAT TAAAGGTTAA TGATGGATAT GAATACATTA AACAAATTAGT
Conservation *****
      ....|....| ....|....| ....|....| ....|....| ....|....| ....|....|
      5585      5595      5605      5615      5625      5635
2d_SalI  TGACAATATT AAAGAGTCAA ATGATGAAAG CAGTATATCA GATAACTTAC AAAAAGGAAA
2d_Thai  TGACAATATT AAAGAGTCAA ATGATGAAAG CAGTATATCA GATAACTTAC AAAAAGGAAA
Conservation *****
      ....|....| ....|....| ....|....| ....|....| ....|....| ....|....|
      5645      5655      5665      5675      5685      5695
2d_SalI  AGAAAAAAT GTAGAAATAC AGAACAAAAT GCAATCTACG TATAAAAACA AGGCAAAAGT
2d_Thai  AGAAAAAAT GTAGAAATAC AGAACAAAAT GCAATCTACG TATAAAAACA AGGCAAAAGT
Conservation *****
      ....|....| ....|....| ....|....| ....|....| ....|....| ....|....|
      5705      5715      5725      5735      5745      5755
2d_SalI  TATTTTAGGA CATATAATTG ACTCCGCAAA ATTTATAGAT ATTAATATAA TTACAAAATC
2d_Thai  TATTTTAGGA CATATAATTG ACTCCGCAAA ATTTATAGAT ATTAATATAA TTACAAAATC
Conservation *****
      ....|....| ....|....| ....|....| ....|....| ....|....| ....|....|
      5765      5775      5785      5795      5805      5815
2d_SalI  ACCACTAAAC GAATTGTCTT CAGAATCACA TTTGATGAAT GCAGGAGAAT TAAAATTTCA
2d_Thai  ACCACTAAAC GAATTGTCTT CAGAATCACA TTTGATGAAT GCAGGAGAAT TAAAATTTCA
Conservation *****
      ....|....| ....|....| ....|....| ....|....| ....|....| ....|....|
      5825      5835      5845      5855      5865      5875
2d_SalI  GCAAGAAAAT AAAGTAACAT TAGAAACAGA ACATATGACA AACAATAAGA GCGAATTAGA
2d_Thai  GCAAGAAAAT AAAGTAACAT TAGAAACAGA ACATATGACA AACAATAAGA GCGAATTAGA
Conservation *****
      ....|....| ....|....| ....|....| ....|....| ....|....| ....|....|
      5885      5895      5905      5915      5925      5935
2d_SalI  TGTTTATAAA AATATACGCG ATGCTTACAA CATCGTTGTG GAGATAATTG CATATTCAGA
2d_Thai  TGTTTATAAA AATATACGCG ATGCTTACAA CATCGTTGTG GAGATAATTG CATATTCAGA
Conservation *****
      ....|....| ....|....| ....|....| ....|....| ....|....| ....|....|
      5945      5955      5965      5975      5985      5995
2d_SalI  TAAAATAGAC ACAAACAAA GACAAAGTAC ACAATTATTG GATGATGGAA ATGATATATA
2d_Thai  TAAAATAGAC ACAAACAAA GACAAAGTAC ACAATTATTG GATGATGGAA ATGATATATA
Conservation *****

```

|              |            |            |             |            |            |             |
|--------------|------------|------------|-------------|------------|------------|-------------|
|              | .... ....  | .... ....  | .... ....   | .... ....  | .... ....  | .... ....   |
|              | 6005       | 6015       | 6025        | 6035       | 6045       | 6055        |
| 2d_SalI      | TCTTACGCTA | AAGTCAATAA | ACGAGCTAAA  | AAATAAAATA | AACTCTGTAA | AAAGTAAAGA  |
| 2d_Thai      | TCTTACGCTA | AAGTCAATAA | ACGAGCTAAA  | AAATAAAATA | AACTCTGTAA | AAAGTAAAGA  |
| Conservation | *****      | *****      | *****       | *****      | *****      | *****       |
|              | .... ....  | .... ....  | .... ....   | .... ....  | .... ....  | .... ....   |
|              | 6065       | 6075       | 6085        | 6095       | 6105       | 6115        |
| 2d_SalI      | AAATGCTATT | TCAGGCAAAA | TAGATAATAT  | TTCAAACAAA | CTTAATGAGT | TAAACAAAAT  |
| 2d_Thai      | AAATGCTATT | TCAGGCAAAA | TAGATAATAT  | TTCAAACAAA | CTTAATGAGT | TAAACAAAAT  |
| Conservation | *****      | *****      | *****       | *****      | *****      | *****       |
|              | .... ....  | .... ....  | .... ....   | .... ....  | .... ....  | .... ....   |
|              | 6125       | 6135       | 6145        | 6155       | 6165       | 6175        |
| 2d_SalI      | TACATGTGAT | GATAAAAGTT | ACGATAATAT  | TTTAGACATA | ATAAAACATA | CAGAATTAAA  |
| 2d_Thai      | TACATGTGAT | GATAAAAGTT | ACGATAATAT  | TTTAGACATA | ATAAAACATA | CAGAATTAAA  |
| Conservation | *****      | *****      | *****       | *****      | *****      | *****       |
|              | .... ....  | .... ....  | .... ....   | .... ....  | .... ....  | .... ....   |
|              | 6185       | 6195       | 6205        | 6215       | 6225       | 6235        |
| 2d_SalI      | AACTATACGT | GATTCTTTTA | AACAAGAAAA  | AATTAACAAA | AAGAGCGATT | CTAAATTGGA  |
| 2d_Thai      | AACTATACGT | GATTCTTTTA | AACAAGAAAA  | AATTAACAAA | AAGAGCGATT | CTAAATTGGA  |
| Conservation | *****      | *****      | *****       | *****      | *****      | *****       |
|              | .... ....  | .... ....  | .... ....   | .... ....  | .... ....  | .... ....   |
|              | 6245       | 6255       | 6265        | 6275       | 6285       | 6295        |
| 2d_SalI      | AAAAATAAAG | GAAGAATTG  | AAAATTCAAA  | AAATACATTA | AAAAATATAG | AAGAAGAAGT  |
| 2d_Thai      | AAAAATAAAG | GAAGAATTG  | AAAATTCAAA  | AAATACATTA | AAAAATATAG | AAGAAGAAGT  |
| Conservation | *****      | *****      | *****       | *****      | *****      | *****       |
|              | .... ....  | .... ....  | .... ....   | .... ....  | .... ....  | .... ....   |
|              | 6305       | 6315       | 6325        | 6335       | 6345       | 6355        |
| 2d_SalI      | TAATGCTCTA | AAGGCTAGTT | TGGTAAAAACA | TGATAATATA | CAAAGCAGAA | ACAAGCCAAT  |
| 2d_Thai      | TAATGCTCTA | AAGGCTAGTT | TGGTAAAAACA | TGATAATATA | CAAAGCAGAA | ACAAGCCAAT  |
| Conservation | *****      | *****      | *****       | *****      | *****      | *****       |
|              | .... ....  | .... ....  | .... ....   | .... ....  | .... ....  | .... ....   |
|              | 6365       | 6375       | 6385        | 6395       | 6405       | 6415        |
| 2d_SalI      | TGATGATGTG | CTAATCGAAA | TAGAAAAAAC  | AGAAAAAGGT | ATAGATAGTT | TTAGTGCCTC  |
| 2d_Thai      | TGATGATGTG | CTAATCGAAA | TAGAAAAAAC  | AGAAAAAGGT | ATAGATAGTT | TTAGTGCCTC  |
| Conservation | *****      | *****      | *****       | *****      | *****      | *****       |
|              | .... ....  | .... ....  | .... ....   | .... ....  | .... ....  | .... ....   |
|              | 6425       | 6435       | 6445        | 6455       | 6465       | 6475        |
| 2d_SalI      | CCTTGATGAG | ATGTTGAAGA | AAGGAAGAGA  | ATGCGAAATA | TTTAGGTATA | CATCCATAAA  |
| 2d_Thai      | CCTTGATGAG | ATGTTGAAGA | AAGGAAGAGA  | ATGCGAAATA | TTTAGGTATA | CATCCATAAA  |
| Conservation | *****      | *****      | *****       | *****      | *****      | *****       |
|              | .... ....  | .... ....  | .... ....   | .... ....  | .... ....  | .... ....   |
|              | 6485       | 6495       | 6505        | 6515       | 6525       | 6535        |
| 2d_SalI      | AGATGGTGTG | ATCGCAAAAA | TAAATGATGA  | CGCAGAATTA | ATCGATAATA | TACACAATAA  |
| 2d_Thai      | AGATGGTGTG | ATCGCAAAAA | TAAATGATGA  | CGCAGAATTA | ATCGATAATA | TACACAATAA  |
| Conservation | *****      | *****      | *****       | *****      | *****      | *****       |
|              | .... ....  | .... ....  | .... ....   | .... ....  | .... ....  | .... ....   |
|              | 6545       | 6555       | 6565        | 6575       | 6585       | 6595        |
| 2d_SalI      | TACTAATGAA | TATTTGACAT | ATGTTCAAAA  | AAATTATAGT | GAAACAGCAG | AGGATGTTTCG |
| 2d_Thai      | TACTAATGAA | TATTTGACAT | ATGTTCAAAA  | AAATTATAGT | GAAACAGCAG | AGGATGTTTCG |
| Conservation | *****      | *****      | *****       | *****      | *****      | *****       |



|              |            |            |            |            |            |            |
|--------------|------------|------------|------------|------------|------------|------------|
|              | .... ....  | .... ....  | .... ....  | .... ....  | .... ....  | .... ....  |
|              | 6605       | 6615       | 6625       | 6635       | 6645       | 6655       |
| 2d_SalI      | TACATTAAT  | CAACATTTCA | TGACAGAAAC | GATAAGCGAT | CATGCGCCAA | CTAATTACGA |
| 2d_Thai      | TACATTAAT  | CAACATTTCA | TGACAGAAAC | GATAAGCGAT | CATGCGCCAA | CTAATTACGA |
| Conservation | *****      | *****      | *****      | *****      | *****      | *****      |
|              | .... ....  | .... ....  | .... ....  | .... ....  | .... ....  | .... ....  |
|              | 6665       | 6675       | 6685       | 6695       | 6705       | 6715       |
| 2d_SalI      | AACATCAAAT | AAATCTTATG | AAGAGATAAC | TGAAGCTGTT | AATAATTCCA | AAGCAATAAT |
| 2d_Thai      | AACATCAAAT | AAATCTTATG | AAGAGATAAC | TGAAGCTGTT | AATAATTCCA | AAGCAATAAT |
| Conservation | *****      | *****      | *****      | *****      | *****      | *****      |
|              | .... ....  | .... ....  | .... ....  | .... ....  | .... ....  | .... ....  |
|              | 6725       | 6735       | 6745       | 6755       | 6765       | 6775       |
| 2d_SalI      | AGATAATATA | CAAAATTCOA | TTATACAAGT | TAACGAAAAA | ACGGAAATTA | GTCTTTTAGA |
| 2d_Thai      | AGATAATATA | CAAAATTCOA | TTATACAAGT | TAACGAAAAA | ACGGAAATTA | GTCTTTTAGA |
| Conservation | *****      | *****      | *****      | *****      | *****      | *****      |
|              | .... ....  | .... ....  | .... ....  | .... ....  | .... ....  | .... ....  |
|              | 6785       | 6795       | 6805       | 6815       | 6825       | 6835       |
| 2d_SalI      | AAATAGCGCA | GAAAAAATAG | AAAAGCTTTA | TAAAGAATTA | CAGGATAAAA | AAAACACCAT |
| 2d_Thai      | AAATAGCGCA | GAAAAAATAG | AAAACCTTTA | TAAAGAATTA | CAGGATAAAA | AAAACACCAT |
| Conservation | *****      | *****      | **** *     | *****      | *****      | *****      |
|              | .... ....  | .... ....  | .... ....  | .... ....  | .... ....  | .... ....  |
|              | 6845       | 6855       | 6865       | 6875       | 6885       | 6895       |
| 2d_SalI      | AAACGAAATT | TATAAAAAGG | CTAACATAGT | TAAATTGCAA | GAAATAAAAT | CAGATGCTGA |
| 2d_Thai      | AAACGAAATT | TATAAAAAGG | CTAACATAGT | TAAATTGCAA | GAAATAAAAT | CAGATGCTGA |
| Conservation | *****      | *****      | *****      | *****      | *****      | *****      |
|              | .... ....  | .... ....  | .... ....  | .... ....  | .... ....  | .... ....  |
|              | 6905       | 6915       | 6925       | 6935       | 6945       | 6955       |
| 2d_SalI      | TAAATATTTG | GATGTAGCTA | ACATATTTAA | TAATGTATTG | GACGGTCAAA | AATCAAGAAT |
| 2d_Thai      | TAAATATTTG | GATGTAGCTA | ACATATTTAA | TAATGTATTG | GACGGTCAAA | AATCAAGAAT |
| Conservation | *****      | *****      | *****      | *****      | *****      | *****      |
|              | .... ....  | .... ....  | .... ....  | .... ....  | .... ....  | .... ....  |
|              | 6965       | 6975       | 6985       | 6995       | 7005       | 7015       |
| 2d_SalI      | AATAAATAAC | CTAGGTAAAA | TAGCCCAAGT | TAAAGAAACA | ATAAACCTAA | AACTGAAGAA |
| 2d_Thai      | AATAAATAAC | CTAGGTAAAA | TAGCCCAAGT | TAAAGAAACA | ATAAACCTAA | AACTGAAGAA |
| Conservation | *****      | *****      | *****      | *****      | *****      | *****      |
|              | .... ....  | .... ....  | .... ....  | .... ....  | .... ....  | .... ....  |
|              | 7025       | 7035       | 7045       | 7055       | 7065       | 7075       |
| 2d_SalI      | ATTGGTTGAG | ACTGACAATA | CATTTACGAC | AGAGTCTATT | AACAGGTTTG | GAGAAATTTA |
| 2d_Thai      | ATTGGTTGAG | ACTGACAATA | CATTTACGAC | AGAGTCTATT | AACAGGTTTG | GAGAAATTTA |
| Conservation | *****      | *****      | *****      | *****      | *****      | *****      |
|              | .... ....  | .... ....  | .... ....  | .... ....  | .... ....  | .... ....  |
|              | 7085       | 7095       | 7105       | 7115       | 7125       | 7135       |
| 2d_SalI      | TAATGACATT | AAGACTAGTA | TAGATGAACT | GGAAATTATA | GAACAAACAA | ATTATAGCGA |
| 2d_Thai      | TAATGACATT | AAGACTAGTA | TAGATGAACT | GGAAATTATA | GAACAAACAA | ATTATAGCGA |
| Conservation | *****      | *****      | *****      | *****      | *****      | *****      |
|              | .... ....  | .... ....  | .... ....  | .... ....  | .... ....  | .... ....  |
|              | 7145       | 7155       | 7165       | 7175       | 7185       | 7195       |
| 2d_SalI      | ACAAAATGAT | GTAAAAAATC | ATAAAGAAAA | AATTACATAC | TTAATAAGCA | GAAGAGAAAC |
| 2d_Thai      | ACAAAATGAT | GTAAAAAATC | ATAAAGAAAA | AATTACATAC | TTAATAAGCA | GAAGAGAAAC |
| Conservation | *****      | *****      | *****      | *****      | *****      | *****      |

|              |            |            |            |            |             |            |
|--------------|------------|------------|------------|------------|-------------|------------|
|              | .... ....  | .... ....  | .... ....  | .... ....  | .... ....   | .... ....  |
|              | 7205       | 7215       | 7225       | 7235       | 7245        | 7255       |
| 2d_SalI      | TTTAGAAAGT | GACCTAAAAG | GACATGAAGA | GGACACAAAT | GTGAAAAAAT  | TAAATGCGAA |
| 2d_Thai      | TTTAGAAAGT | GACCTAAAAG | GACATGAAGA | GGACACAAAT | GTGAAAAAAT  | TAAATGCGAA |
| Conservation | *****      | *****      | *****      | *****      | *****       | *****      |
|              |            |            |            |            |             |            |
|              | .... ....  | .... ....  | .... ....  | .... ....  | .... ....   | .... ....  |
|              | 7265       | 7275       | 7285       | 7295       | 7305        | 7315       |
| 2d_SalI      | TACATTAAGT | GAAGTAAATA | TTGGCATTGC | AAGTGCAAAA | GAAGCTATAA  | GCAACTCAGA |
| 2d_Thai      | TACATTAAGT | GAAGTAAATA | TTGGCATTGC | AAGTGCAAAA | GAAGCTATAA  | GCAACTCAGA |
| Conservation | *****      | *****      | *****      | *****      | *****       | *****      |
|              |            |            |            |            |             |            |
|              | .... ....  | .... ....  | .... ....  | .... ....  | .... ....   | .... ....  |
|              | 7325       | 7335       | 7345       | 7355       | 7365        | 7375       |
| 2d_SalI      | GGAAGTATTT | AAGAAATTAT | TAAGAAAAAT | AGAAGAAAAT | GAAAGATTAT  | GTAATAATAA |
| 2d_Thai      | GGAAGTATTT | AAGAAATTAT | TAAGAAAAAT | AGAAGAAAAT | GAAAGATTAT  | GTAATAATAA |
| Conservation | *****      | *****      | *****      | *****      | *****       | *****      |
|              |            |            |            |            |             |            |
|              | .... ....  | .... ....  | .... ....  | .... ....  | .... ....   | .... ....  |
|              | 7385       | 7395       | 7405       | 7415       | 7425        | 7435       |
| 2d_SalI      | TGATGCAAAG | AATTTTATTT | CGGATATTAT | GCAAAATATA | GATGATCTGA  | ATAAACGTTT |
| 2d_Thai      | TGATGCAAAG | AATTTTATTT | CGGATATTAT | GCAAAATATA | GATGATCTGA  | ATAAACGTTT |
| Conservation | *****      | *****      | *****      | *****      | *****       | *****      |
|              |            |            |            |            |             |            |
|              | .... ....  | .... ....  | .... ....  | .... ....  | .... ....   | .... ....  |
|              | 7445       | 7455       | 7465       | 7475       | 7485        | 7495       |
| 2d_SalI      | CACAAAAAAT | ATACCAGAAA | GAGAAAAACT | TTTTGAAATA | AAAAGG-ATT  | ATATATAATG |
| 2d_Thai      | CACAAAAAAT | ATACCAGAAA | GAGAAAAACT | TTTTGAAATA | GAAAAGGATT  | ATATATAATG |
| Conservation | *****      | *****      | *****      | *****      | ***.* **    | *****      |
|              |            |            |            |            |             |            |
|              | .... ....  | .... ....  | .... ....  | .... ....  | .... ....   | .... ....  |
|              | 7505       | 7515       | 7525       | 7535       | 7545        | 7555       |
| 2d_SalI      | AAATTAATTC | CATTTTCAAT | GAAATAAGAA | CACTTAACGT | TGACGAATTT  | GTTGAAAAAA |
| 2d_Thai      | AAATTAATTC | CATTTTCAAT | GAAATAAGAA | CACTTAACGT | TGACGAATTT  | GTTGAAAAAA |
| Conservation | *****      | *****      | *****      | *****      | *****       | *****      |
|              |            |            |            |            |             |            |
|              | .... ....  | .... ....  | .... ....  | .... ....  | .... ....   | .... ....  |
|              | 7565       | 7575       | 7585       | 7595       | 7605        | 7615       |
| 2d_SalI      | TGTATAAACA | AATTGATAGT | GAAAAGGAAA | GCGTAAATAA | CATAACAGAT  | ACTGATAAGA |
| 2d_Thai      | TGTATAAACA | AATTGATAGT | GAAAAGGAAA | GCGTAAATAA | CATAACAGAT  | ACTGATAAGA |
| Conservation | *****      | *****      | *****      | *****      | *****       | *****      |
|              |            |            |            |            |             |            |
|              | .... ....  | .... ....  | .... ....  | .... ....  | .... ....   | .... ....  |
|              | 7625       | 7635       | 7645       | 7655       | 7665        | 7675       |
| 2d_SalI      | TAAGTGTTGC | AATTCAAAAT | GTTACAAATT | ACGATGCAGA | AATAAAAAGGC | TTATTGTCTA |
| 2d_Thai      | TAAGTGTTGC | AATTCAAAAT | GTTACAAATT | ACGATGCAGA | AATAAAAAGGC | TTATTGTCTA |
| Conservation | *****      | *****      | *****      | *****      | *****       | *****      |
|              |            |            |            |            |             |            |
|              | .... ....  | .... ....  | .... ....  | .... ....  | .... ....   | .... ....  |
|              | 7685       | 7695       | 7705       | 7715       | 7725        | 7735       |
| 2d_SalI      | GAACTATTAA | CGTATTAGAA | AGAATAAGTA | GAAGGAAAGC | GGAATGGAT   | ACTTTATTCA |
| 2d_Thai      | GAACTATTAA | CGTATTAGAA | AGAATAAGTA | GAAGGAAAGC | GGAATGGAT   | ACTTTATTCA |
| Conservation | *****      | *****      | *****      | *****      | *****       | *****      |
|              |            |            |            |            |             |            |
|              | .... ....  | .... ....  | .... ....  | .... ....  | .... ....   | .... ....  |
|              | 7745       | 7755       | 7765       | 7775       | 7785        | 7795       |
| 2d_SalI      | ATAGTCTATC | ATCGAATAAT | AAAAACCTAA | ATGAAAATGC | AAAAAGATAC  | ATGAATGATT |
| 2d_Thai      | ATAGTCTATC | ATCGAATAAT | AAAAACCTAA | ATGAAAATGC | AAAAAGATAC  | ATGAATGATT |
| Conservation | *****      | *****      | *****      | *****      | *****       | *****      |

|              |            |            |            |             |            |            |
|--------------|------------|------------|------------|-------------|------------|------------|
|              | .... ....  | .... ....  | .... ....  | .... ....   | .... ....  | .... ....  |
|              | 7805       | 7815       | 7825       | 7835        | 7845       | 7855       |
| 2d_SalI      | CAGCTGAAAT | AATTAATCAA | TTAAATAGCC | ATGTTCAAAA  | AATAACAAAA | CTGAAAACAT |
| 2d_Thai      | CAGCTGAAAT | AATTAATCAA | TTAAATAGCC | ATGTTCAAAA  | AATAACAAAA | CTGAAAACAT |
| Conservation | *****      | *****      | *****      | *****       | *****      | *****      |
|              | .... ....  | .... ....  | .... ....  | .... ....   | .... ....  | .... ....  |
|              | 7865       | 7875       | 7885       | 7895        | 7905       | 7915       |
| 2d_SalI      | ATGCAAATGA | GGTAATTGAA | CAATTACAAA | AAGAACTAAC  | AAGATTATTA | GATCAACGTA |
| 2d_Thai      | ATGCAAATGA | GGTAATTGAA | CAATTACAAA | AAGAACTAAC  | AAGATTATTA | GATCAACGTA |
| Conservation | *****      | *****      | *****      | *****       | *****      | *****      |
|              | .... ....  | .... ....  | .... ....  | .... ....   | .... ....  | .... ....  |
|              | 7925       | 7935       | 7945       | 7955        | 7965       | 7975       |
| 2d_SalI      | AAATTGAAAT | TCCAGTTGAT | GATACTCAAA | CTTCTTTAAG  | TACCGAGGAC | GTAAAAGAAG |
| 2d_Thai      | AAATTGAAAT | TCCAGTTGAT | GATACTCAAA | CTTCTTTAAG  | TACCGAGGAC | GTAAAAGAAG |
| Conservation | *****      | *****      | *****      | *****       | *****      | *****      |
|              | .... ....  | .... ....  | .... ....  | .... ....   | .... ....  | .... ....  |
|              | 7985       | 7995       | 8005       | 8015        | 8025       | 8035       |
| 2d_SalI      | AAACTGCTAA | TCAGAAGGAG | CTAGAAACTG | ATAAGCAGAA  | GGAGCTAGAA | AAAGCCATAG |
| 2d_Thai      | AAACTGCTAA | TCAGAAGGAG | CTAGAAACTG | ATAAGCAGAA  | GGAGCTAGAA | AAAGCCATAG |
| Conservation | *****      | *****      | *****      | *****       | *****      | *****      |
|              | .... ....  | .... ....  | .... ....  | .... ....   | .... ....  | .... ....  |
|              | 8045       | 8055       | 8065       | 8075        | 8085       | 8095       |
| 2d_SalI      | AAAAGGAACA | AGAAGAAGCT | GTAGAAGGTG | AACTACAAAA  | AACTATAGAA | GTGGAAAAAG |
| 2d_Thai      | AAAAGGAACA | AGAAGAAGCT | GTAGAAGGTG | AACTACAAAA  | AACTATAGAA | GTGGAAAAAG |
| Conservation | *****      | *****      | *****      | *****       | *****      | *****      |
|              | .... ....  | .... ....  | .... ....  | .... ....   | .... ....  | .... ....  |
|              | 8105       | 8115       | 8125       | 8135        | 8145       | 8155       |
| 2d_SalI      | AATCTGCTAT | AAAAGAGGAA | CAAGAAACTC | CTGAGCAGGA  | GGAACGAGAA | ACATCTATAA |
| 2d_Thai      | AATCTGCTAT | AAAAGAGGAA | CAAGAAACTC | CTGAGCAGGA  | GGAACGAGAA | ACATCTATAA |
| Conservation | *****      | *****      | *****      | *****       | *****      | *****      |
|              | .... ....  | .... ....  | .... ....  | .... ....   | .... ....  | .... ....  |
|              | 8165       | 8175       | 8185       | 8195        | 8205       | 8215       |
| 2d_SalI      | ATCAGGAACC | AGAACATGTT | ACTTATGAGA | CACTAGGATA  | TGATACACCA | CATGCCCAAG |
| 2d_Thai      | ATCAGGAACC | AGAACATGTT | ACTTATGAGA | CACTAGGATA  | TGATACACCA | CATGCCCAAG |
| Conservation | *****      | *****      | *****      | *****       | *****      | *****      |
|              | .... ....  | .... ....  | .... ....  | .... ....   | .... ....  | .... ....  |
|              | 8225       | 8235       | 8245       | 8255        | 8265       | 8275       |
| 2d_SalI      | AAAACGAGAG | CGATGGTACT | CAACACGACG | ATTCAGAAAAG | AGATGATAAA | TCAAAGGCAA |
| 2d_Thai      | AAAACGAGAG | CGATGGTACT | CAACACGACG | ATTCAGAAAAG | AGATGATAAA | TCAAAGGCAA |
| Conservation | *****      | *****      | *****      | *****       | *****      | *****      |
|              | .... ....  | .... ....  | .... ....  | .... ....   | .... ....  | .... ....  |
|              | 8285       | 8295       | 8305       | 8315        | 8325       | 8335       |
| 2d_SalI      | AAGATGCAAT | GGGAAGAACT | CGTTTGGCAG | GAGCTATTAT  | TATCGGTTTA | TCTTTTTTTC |
| 2d_Thai      | AAGATGCAAT | GGGAAGAACT | CGTTTGGCAG | GAGCTATTAT  | TATCGGTTTA | TCTTTTTTTC |
| Conservation | *****      | *****      | *****      | *****       | *****      | *****      |
|              | .... ....  | .... ....  | .... ....  | .... ....   | .... ....  | .... ....  |
|              | 8345       | 8355       | 8365       | 8375        | 8385       | 8395       |
| 2d_SalI      | CCGGAGTTCT | TGTATTAGCA | TTTAGGGACA | CGCAAACAGA  | AGAAGAGGAA | AGCCATGAAC |
| 2d_Thai      | CCGGAGTTCT | TGTATTAGCA | TTTAGGGACA | CGCAAACAGA  | AGAAGAGGAA | AGCCATGAAC |
| Conservation | *****      | *****      | *****      | *****       | *****      | *****      |

```

      ....|....| ....|....| ....|....| ....|....| ....|....|
      8405      8415      8425      8435      8445      8455
2d_SalI  ATGATCATCA TCAAGCATTT GGAGGTACTG ATGATTATAA TATGCAAGAT AAAGAAGAAG
2d_Thai  ATGATTATCA TCAAGCATTT GGAGGTACTG ATGATTATAA TATGCAAGAT AAAGAAGAAG
Conservation ***** **

```

```

      ....|....| ....|....| ....|....| ..
      8465      8475      8485
2d_SalI  TTATCGAAGT CTGTTTTAAT GAGGATGATT AA
2d_Thai  TTATCGAAGT CTGTTTTAAT GAGGATGATT AA
Conservation ***** ***** ***** **

```

**Alignment: Pvrpb2dtr** (align with genomic DNA of SalI)

```

.....|.....| .....|.....| .....|.....| .....|.....| .....|.....|
      5          15          25          35          45          55
2d_SalI_Ge ATGGAAAAAA GAGCCTTTTG GATCATCTTT TACAATTTAA TATTATTTT TTTCGgtaaa
2dtr_Thai  ATGGAAAAAA GAGCCTTTTG AATCATCTTT TACAATTTAA TATTATTTT TTTCGGTAAA
Conservation ***** .***** ***** ***** ***** *****

.....|.....| .....|.....| .....|.....| .....|.....| .....|.....|
      65          75          85          95          105         115
2d_SalI_Ge attaaatcat ggcacacatac acgtaaattt atttgaatat gttcgcgctcaa attattgtaa
2dtr_Thai  ATTAAATCAT GCGCACATAC ACGTAAATTT ATTTGAATAT GTTCGCTCAA ATTATTGTAA
Conservation ***** ***** ***** ***** ***** *****

.....|.....| .....|.....| .....|.....| .....|.....| .....|.....|
      125         135         145         155         165         175
2d_SalI_Ge ccctaaaccc tgaaacctaa accctaaatt gaatgcaaat gttcacggtt gtacatttcc
2dtr_Thai  CCCTAAACCC TGAACCCTAA ACCAT----- -----
Conservation ***** ****.* ***** **.*

.....|.....| .....|.....| .....|.....| .....|.....| .....|.....|
      185         195         205         215         225         235
2d_SalI_Ge ataaattttc atttaactga atcgtttacat atgctaaaat ctgttgtaac atgtattcat
2dtr_Thai  -----
Conservation

.....|.....| .....|.....| .....|.....| .....|.....| .....|.....|
      245         255         265         275         285         295
2d_SalI_Ge ttgaatttta atatcctata tttttcagCA TCATGTAAGG ATGTCAATCG AAACAAACCC
2dtr_Thai  -----
Conservation

.....|.....| .....|.....| .....|.....| .....|.....| .....|.....|
      305         315         325         335         345         355
2d_SalI_Ge GGAAGACTAA AATATCATCG GAAGCTATTA CCAGCATATG TTAACCTAAT GAGCCCTGAT
2dtr_Thai  -----
Conservation

.....|.....| .....|.....| .....|.....| .....|.....| .....|.....|
      365         375         385         395         405         415
2d_SalI_Ge AAAGACGGAT ATAAGGGTGC CGAAAAGGAT GATAAGGCAA ATAATCATAA CGACAACAAT
2dtr_Thai  -----
Conservation

.....|.....| .....|.....| .....|.....| .....|.....| .....|.....|
      425         435         445         455         465         475
2d_SalI_Ge AATGGCAACA ATAATGACAA CAATAATAAT AGTGACAATA ATGATGAAAA CAGTAATAAT
2dtr_Thai  -----
Conservation

.....|.....| .....|.....| .....|.....| .....|.....| .....|.....|
      485         495         505         515         525         535
2d_SalI_Ge AGTGAAAATC TCAGAACGTC AAATTTACAA AATAGTTCAT CAGTGGGGCA TTAAACAAC
2dtr_Thai  -----
Conservation

.....|.....| .....|.....| .....|.....| .....|.....| .....|.....|
      545         555         565         575         585         595
2d_SalI_Ge CACGAAGATA CAACGAAACC ATCCATTAC TCTTACTTGA AAAAAAGCAA CATATATGCA
2dtr_Thai  -----
Conservation

```

|              |            |            |             |            |            |            |
|--------------|------------|------------|-------------|------------|------------|------------|
|              | .... ....  | .... ....  | .... ....   | .... ....  | .... ....  | .... ....  |
|              | 605        | 615        | 625         | 635        | 645        | 655        |
| 2d_SalI_Ge   | CCGGATGCAA | AGAATAATAA | AATGGAAGAT  | GATAATAAAA | AATTGCATAC | TGTTTCAAAT |
| 2dtr_Thai    | -----      | -----      | -----       | -----      | -----      | -----      |
| Conservation |            |            |             |            |            |            |
|              | .... ....  | .... ....  | .... ....   | .... ....  | .... ....  | .... ....  |
|              | 665        | 675        | 685         | 695        | 705        | 715        |
| 2d_SalI_Ge   | TCCTTCATTC | AAAATAGTAA | ACAAGCCCAA  | AATATAATTG | CAACTAATAA | TTTGATTAT  |
| 2dtr_Thai    | -----      | -----      | -----       | -----      | -----      | -----      |
| Conservation |            |            |             |            |            |            |
|              | .... ....  | .... ....  | .... ....   | .... ....  | .... ....  | .... ....  |
|              | 725        | 735        | 745         | 755        | 765        | 775        |
| 2d_SalI_Ge   | ATTAGTGCCA | TTGATGATTA | TAACAATATA  | ATTTCTTCAT | TTCAACCATA | TCATGCTAGT |
| 2dtr_Thai    | -----      | -----      | -----       | -----      | -----A     | TCATGCTAGT |
| Conservation |            |            |             |            | *          | *****      |
|              | .... ....  | .... ....  | .... ....   | .... ....  | .... ....  | .... ....  |
|              | 785        | 795        | 805         | 815        | 825        | 835        |
| 2d_SalI_Ge   | GTATATTACT | TGAATGAATT | GAAACTACTAT | GCAACACATT | ACAATGAATT | GAAGTTCTT  |
| 2dtr_Thai    | GTATATTACT | TGAATGAATT | GAAACTACTAT | GCAACACATT | ACAATGAATT | GAAGTTCTT  |
| Conservation | *****      | *****      | *****       | *****      | *****      | *****      |
|              | .... ....  | .... ....  | .... ....   | .... ....  | .... ....  | .... ....  |
|              | 845        | 855        | 865         | 875        | 885        | 895        |
| 2d_SalI_Ge   | GTTCAAAAAG | ATGTCATTCC | TCAAGTAACA  | CACATTACCA | ATATTGTTGA | GAAAAACGTT |
| 2dtr_Thai    | GTTCAAAAAG | ATGTCATTCC | TCAAGTAACA  | CACATTACCA | ATATTGTTGA | GAAAAACGTT |
| Conservation | *****      | *****      | *****       | *****      | *****      | *****      |
|              | .... ....  | .... ....  | .... ....   | .... ....  | .... ....  | .... ....  |
|              | 905        | 915        | 925         | 935        | 945        | 955        |
| 2d_SalI_Ge   | AAGATCTGTT | TGGAGAAAAC | ACATGAATTG  | AATACATTAA | TAACTCAATT | AGAAAATCCA |
| 2dtr_Thai    | AAGATCTGTT | TGGAGAAAAC | ACATGAATTG  | AATACATTAA | TAACTCAATT | AGAAAATCCA |
| Conservation | *****      | *****      | *****       | *****      | *****      | *****      |
|              | .... ....  | .... ....  | .... ....   | .... ....  | .... ....  | .... ....  |
|              | 965        | 975        | 985         | 995        | 1005       | 1015       |
| 2d_SalI_Ge   | CAAACATATA | ATATTCAAAG | AAGCCATTAT  | AGTAATAGAG | TAAAAGATTA | CCGTAAGAAA |
| 2dtr_Thai    | CAAACATATA | ATATTCAAAG | AAGCCATTAT  | AGTAATAGAG | TAAAAGATTA | CCGTAAGAAA |
| Conservation | *****      | *****      | *****       | *****      | *****      | *****      |
|              | .... ....  | .... ....  | .... ....   | .... ....  | .... ....  | .... ....  |
|              | 1025       | 1035       | 1045        | 1055       | 1065       | 1075       |
| 2d_SalI_Ge   | ATTGAGGATA | TTCAAAATTG | TTTAAAATTA  | AATTATAAAA | GAAATGTTAA | AGCTACAGTA |
| 2dtr_Thai    | ATTGAGGATA | TTCAAAATTG | TTTAAAATTA  | AATTATAAAA | GAAATGTTAA | AGCTACAGTA |
| Conservation | *****      | *****      | *****       | *****      | *****      | *****      |
|              | .... ....  | .... ....  | .... ....   | .... ....  | .... ....  | .... ....  |
|              | 1085       | 1095       | 1105        | 1115       | 1125       | 1135       |
| 2d_SalI_Ge   | TTTGCCACAA | TAATATGGTT | CCAGACACTA  | ATTAAAATGG | AATGTAGTTG | GTGGACCAAA |
| 2dtr_Thai    | TTTGCCACAA | TAATATGGTT | CCAGACACTA  | ATTAAAATGG | AATGTAGTTG | GTGGACCAAA |
| Conservation | *****      | *****      | *****       | *****      | *****      | *****      |
|              | .... ....  | .... ....  | .... ....   | .... ....  | .... ....  | .... ....  |
|              | 1145       | 1155       | 1165        | 1175       | 1185       | 1195       |
| 2d_SalI_Ge   | TCATGTTCAA | CGAGAATCTA | TTATAATATG  | ATTAAGATGT | ATACATTAAA | AATTAAGGAG |
| 2dtr_Thai    | TCATGTTCAA | CGAGAATCTA | TTATAATATG  | ATTAAGATGT | ATACATTAAA | AATTAAGGAG |
| Conservation | *****      | *****      | *****       | *****      | *****      | *****      |

|              |             |            |            |             |            |            |
|--------------|-------------|------------|------------|-------------|------------|------------|
|              | .... ....   | .... ....  | .... ....  | .... ....   | .... ....  | .... ....  |
|              | 1205        | 1215       | 1225       | 1235        | 1245       | 1255       |
| 2d_SalI_Ge   | TATAAAATCA  | AAAAACCAAC | TGCATATATG | GATAAAAATAA | AGGCTGTTTA | TAAGTTAGCT |
| 2dtr_Thai    | TATAAAATCA  | AAAAACCAAC | TGCATATATG | GATAAAAATAA | AGGCTGTTTA | TAAGTTAGCT |
| Conservation | *****       | *****      | *****      | *****       | *****      | *****      |
|              | .... ....   | .... ....  | .... ....  | .... ....   | .... ....  | .... ....  |
|              | 1265        | 1275       | 1285       | 1295        | 1305       | 1315       |
| 2d_SalI_Ge   | AATGATACAA  | TATGGAGAAT | AAAAGTAGAA | TTAAACTCAA  | ATCTTGATTC | GGATACAACC |
| 2dtr_Thai    | AATGATACAA  | TATGGAGAAT | AAAAGTAGAA | TTAAACTCAA  | ATCTTGATTC | GGATACAACC |
| Conservation | *****       | *****      | *****      | *****       | *****      | *****      |
|              | .... ....   | .... ....  | .... ....  | .... ....   | .... ....  | .... ....  |
|              | 1325        | 1335       | 1345       | 1355        | 1365       | 1375       |
| 2d_SalI_Ge   | GACTTTTATTC | TAGAAGAATT | TAAATACATT | ATAGAAAAGT  | ATAATGGTCA | CATTGATAAA |
| 2dtr_Thai    | GACTTTTATTC | TAGAAGAATT | TAAATACATT | ATAGAAAAGT  | ATAATGGTCA | CATTGATAAA |
| Conservation | *****       | *****      | *****      | *****       | *****      | *****      |
|              | .... ....   | .... ....  | .... ....  | .... ....   | .... ....  | .... ....  |
|              | 1385        | 1395       | 1405       | 1415        | 1425       | 1435       |
| 2d_SalI_Ge   | ATTAATTTGG  | GAACTTCTTA | TATAGATCAT | ATTCATGAAC  | AAGAAGGAAC | TTTGAATAAT |
| 2dtr_Thai    | ATTAATTTGG  | GAACTTCTTA | TATAGATCAT | ATTCATGAAC  | AAGAAGGAAC | TTTGAATAAT |
| Conservation | *****       | *****      | *****      | *****       | *****      | *****      |
|              | .... ....   | .... ....  | .... ....  | .... ....   | .... ....  | .... ....  |
|              | 1445        | 1455       | 1465       | 1475        | 1485       | 1495       |
| 2d_SalI_Ge   | ACTAAAATAG  | AAATTATAAC | TTTGTATTCT | GTGATAGCTA  | ATCGTTACAC | TGCTTTTAAA |
| 2dtr_Thai    | ACTAAAATAG  | AAATTATAAC | TTTGTATTCT | GTGATAGCTA  | ATCGTTACAC | TGCTTTTAAA |
| Conservation | *****       | *****      | *****      | *****       | *****      | *****      |
|              | .... ....   | .... ....  | .... ....  | .... ....   | .... ....  | .... ....  |
|              | 1505        | 1515       | 1525       | 1535        | 1545       | 1555       |
| 2d_SalI_Ge   | TTTAGTTTAG  | AACATATAAA | TATGTTTGAA | AATACATCCA  | AAAGTAAAGA | ACAGGTACTT |
| 2dtr_Thai    | TTTAGTTTAG  | AACATATAAA | TATGTTTGAA | AATACATCCA  | AAAGTAAAGA | ACAGGTACTT |
| Conservation | *****       | *****      | *****      | *****       | *****      | *****      |
|              | .... ....   | .... ....  | .... ....  | .... ....   | .... ....  | .... ....  |
|              | 1565        | 1575       | 1585       | 1595        | 1605       | 1615       |
| 2d_SalI_Ge   | TATAACTCTT  | TTAGCAAATT | TGAGGATAGA | TTACAAAAGA  | AAATAAACGA | TCTTATTAAT |
| 2dtr_Thai    | TATAACTCTT  | TTAGCAAATT | TGAGGATAGA | TTACAAAAGA  | AAATAAACGA | TCTTATTAAT |
| Conservation | *****       | *****      | *****      | *****       | *****      | *****      |
|              | .... ....   | .... ....  | .... ....  | .... ....   | .... ....  | .... ....  |
|              | 1625        | 1635       | 1645       | 1655        | 1665       | 1675       |
| 2d_SalI_Ge   | TCTGAATTTT  | CTATATCAAC | CGTTAACTCT | GTCATTTTGG  | ATTCCGAAAA | AAATATACAA |
| 2dtr_Thai    | TCTGAATTTT  | CTATATCAAC | CGTTAACTCT | GTCATTTTGG  | ATTCCGAAAA | AAATATACAA |
| Conservation | *****       | *****      | *****      | *****       | *****      | *****      |
|              | .... ....   | .... ....  | .... ....  | .... ....   | .... ....  | .... ....  |
|              | 1685        | 1695       | 1705       | 1715        | 1725       | 1735       |
| 2d_SalI_Ge   | TTATCAGAAT  | CATTACTCAA | CTCGAGTTCT | AAAGAAATAG  | CACAACATGA | AATTAATAA  |
| 2dtr_Thai    | TTATCAGAAT  | CATTACTCAA | CTCGAGTTCT | AAAGAAATAG  | CACAACATGA | AATTAATAA  |
| Conservation | *****       | *****      | *****      | *****       | *****      | *****      |
|              | .... ....   | .... ....  | .... ....  | .... ....   | .... ....  | .... ....  |
|              | 1745        | 1755       | 1765       | 1775        | 1785       | 1795       |
| 2d_SalI_Ge   | AATGCGGAAA  | TTGAAAAGAA | AAAAAAAGAT | TATGATCAAA  | AAATTATAAG | AGCAAGAGAA |
| 2dtr_Thai    | AATGCGGAAA  | TTGAAAAGAA | AAAAAAAGAT | TATGATCAAA  | AAATTATAAG | AGCAAGAGAA |
| Conservation | *****       | *****      | *****      | *****       | *****      | *****      |

|              |            |            |             |            |             |            |
|--------------|------------|------------|-------------|------------|-------------|------------|
|              | .... ....  | .... ....  | .... ....   | .... ....  | .... ....   | .... ....  |
|              | 1805       | 1815       | 1825        | 1835       | 1845        | 1855       |
| 2d_SalI_Ge   | ACTATAAAAA | AATCAAAGGA | ATTAATTACA  | TCTGTAAAAA | ACGCATTTAA  | GTTAAGTTTA |
| 2dtr_Thai    | ACTATAAAAA | AATCAAAGGA | ATTAATTACA  | TCTGTAAAAA | ACGCATTTAA  | GTTAAGTTTA |
| Conservation | *****      | *****      | *****       | *****      | *****       | *****      |
|              | .... ....  | .... ....  | .... ....   | .... ....  | .... ....   | .... ....  |
|              | 1865       | 1875       | 1885        | 1895       | 1905        | 1915       |
| 2d_SalI_Ge   | GAAGAAAAGG | AAAAGATAGA | AAAGAAAGTA  | ACAGAAGCAA | AAAAATTGCC  | AAACGCTCTA |
| 2dtr_Thai    | GAAGAAAAGG | AAAAGATAGA | AAAGAAAGTA  | ACAGAAGCAA | AAAAATTGCC  | AAACGCTCTA |
| Conservation | *****      | *****      | *****       | *****      | *****       | *****      |
|              | .... ....  | .... ....  | .... ....   | .... ....  | .... ....   | .... ....  |
|              | 1925       | 1935       | 1945        | 1955       | 1965        | 1975       |
| 2d_SalI_Ge   | GAAAGAGACA | AAGCATATTT | AGACATTATG  | AGTGAATAA  | GAAAAATTAA  | AAATAAGTTA |
| 2dtr_Thai    | GAAAGAGACA | AAGCATATTT | AGACATTATG  | AGTGAATAA  | GAAAAATTAA  | AAATAAGTTA |
| Conservation | *****      | *****      | *****       | *****      | *****       | *****      |
|              | .... ....  | .... ....  | .... ....   | .... ....  | .... ....   | .... ....  |
|              | 1985       | 1995       | 2005        | 2015       | 2025        | 2035       |
| 2d_SalI_Ge   | TCTGATAATG | CTAGAAAGAC | AACCGAATTT  | ACTAAAAAAT | CAAAATGCTTT | AAAAAAGGAA |
| 2dtr_Thai    | TCTGATAATG | CTAGAAAGAC | AACCGAATTT  | ACTAAAAAAT | CAAAATGCTTT | AAAAAAGGAA |
| Conservation | *****      | *****      | *****       | *****      | *****       | *****      |
|              | .... ....  | .... ....  | .... ....   | .... ....  | .... ....   | .... ....  |
|              | 2045       | 2055       | 2065        | 2075       | 2085        | 2095       |
| 2d_SalI_Ge   | GTTCAAGAAT | TAAATACAAG | TGTTAAACAAC | TATGTGCAAG | CAATAAAGGA  | ACAAAAAGAA |
| 2dtr_Thai    | GTTCAAGAAT | TAAATACAAG | TGTTAAACAAC | TATGTGCAAG | CAATAAAGGA  | ACAAAAAGAA |
| Conservation | *****      | *****      | *****       | *****      | *****       | *****      |
|              | .... ....  | .... ....  | .... ....   | .... ....  | .... ....   | .... ....  |
|              | 2105       | 2115       | 2125        | 2135       | 2145        | 2155       |
| 2d_SalI_Ge   | AAAGAAATTC | GGAATAATTC | TTTGAAAGAT  | GAAATAAAAA | AGTTTTTGGA  | ATATATACCT |
| 2dtr_Thai    | AAAGAAATTC | GGAATAATTC | TTTGAAAGAT  | GAAATAAAAA | AGTTTTTGGA  | ATATATACCT |
| Conservation | *****      | *****      | *****       | *****      | *****       | *****      |
|              | .... ....  | .... ....  | .... ....   | .... ....  | .... ....   | .... ....  |
|              | 2165       | 2175       | 2185        | 2195       | 2205        | 2215       |
| 2d_SalI_Ge   | AATAACAGAG | AAAAAATAAA | AGAATTAATT  | ACCAAAAAGA | ATGAAGTGCA  | ACAATATATT |
| 2dtr_Thai    | AATAACAGAG | AAAAAATAAA | AGAATTAATT  | ACCAAAAAGA | ATGAAGTGCA  | ACAATATATT |
| Conservation | *****      | *****      | *****       | *****      | *****       | *****      |
|              | .... ....  | .... ....  | .... ....   | .... ....  | .... ....   | .... ....  |
|              | 2225       | 2235       | 2245        | 2255       | 2265        | 2275       |
| 2d_SalI_Ge   | CCCAAAATG  | AAGAATTAAT | TAAAGACGCA  | CACTTTGGTG | TAGAAGAATT  | TACAGCCAAA |
| 2dtr_Thai    | CCCAAAATG  | AAGAATTAAT | TAAAGACGCA  | CACTTTGGTG | TAGAAGAATT  | TACAGCCAAA |
| Conservation | *****      | *****      | *****       | *****      | *****       | *****      |
|              | .... ....  | .... ....  | .... ....   | .... ....  | .... ....   | .... ....  |
|              | 2285       | 2295       | 2305        | 2315       | 2325        | 2335       |
| 2d_SalI_Ge   | AAAACAGAAT | TGCAAAATCA | GGTAAATTCA  | ATAATTGATG | CATTTTATAA  | AGAAGACCTA |
| 2dtr_Thai    | AAAACAGAAT | TGCAAAATCA | GGTAAATTCA  | ATAATTGATG | CATTTTATAA  | AGAAGACCTA |
| Conservation | *****      | *****      | *****       | *****      | *****       | *****      |
|              | .... ....  | .... ....  | .... ....   | .... ....  | .... ....   | .... ....  |
|              | 2345       | 2355       | 2365        | 2375       | 2385        | 2395       |
| 2d_SalI_Ge   | CAATTATTTT | TAGACAATTT | ATCAAAATCT  | TATGATGAAA | ATCAAGTTTT  | AGAGAAGGAA |
| 2dtr_Thai    | CAATTATTTT | TAGACAATTT | ATCAAAATCT  | TATGATGAAA | ATCAAGTTTT  | AGAGAAGGAA |
| Conservation | *****      | *****      | *****       | *****      | *****       | *****      |



|              |            |            |             |            |             |            |
|--------------|------------|------------|-------------|------------|-------------|------------|
|              | .... ....  | .... ....  | .... ....   | .... ....  | .... ....   | .... ....  |
|              | 2405       | 2415       | 2425        | 2435       | 2445        | 2455       |
| 2d_SalI_Ge   | GCTGATACTA | CAGAAAAGAT | TGAAGAACTT  | CACAAAAGAA | CCAAAATGGA  | TTATGAAAAA |
| 2dtr_Thai    | GCTGATACTA | CAGAAAAGAT | TGAAGAACTT  | CACAAAAGAA | CCAAAATGGA  | TTATGAAAAA |
| Conservation | *****      | *****      | *****       | *****      | *****       | *****      |
|              | .... ....  | .... ....  | .... ....   | .... ....  | .... ....   | .... ....  |
|              | 2465       | 2475       | 2485        | 2495       | 2505        | 2515       |
| 2d_SalI_Ge   | CTTCTAAATA | TGAAATGTGA | TGATATACCC  | GAAATAATAA | AAAAGTTGAA  | TACAGAATTA |
| 2dtr_Thai    | CTTCTAAATA | TGAAATGTGA | TGATATACCC  | GAAATAATAA | AAAAGTTGAA  | TACAGAATTA |
| Conservation | *****      | *****      | *****       | *****      | *****       | *****      |
|              | .... ....  | .... ....  | .... ....   | .... ....  | .... ....   | .... ....  |
|              | 2525       | 2535       | 2545        | 2555       | 2565        | 2575       |
| 2d_SalI_Ge   | AATAATCTCA | AAAATTTAGA | AAAAATATT   | GTAGAAGAAC | AGACTAAAAA  | CATTAATAAA |
| 2dtr_Thai    | AATAATCTCA | AAAATTTAGA | AAAAATATT   | GTAGAAGAAC | AGACTAAAAA  | CATTAATAAA |
| Conservation | *****      | *****      | *****       | *****      | *****       | *****      |
|              | .... ....  | .... ....  | .... ....   | .... ....  | .... ....   | .... ....  |
|              | 2585       | 2595       | 2605        | 2615       | 2625        | 2635       |
| 2d_SalI_Ge   | TATGTTTCAG | ATTCATTTGA | TAACCTAACT  | GATGAAATGA | ACCGTTTAAAG | AAATAGCTTG |
| 2dtr_Thai    | TATGTTTCAG | ATTCATTTGA | TAACCTAACT  | GATGAAATGA | ACCGTTTAAAG | AAATAGCTTG |
| Conservation | *****      | *****      | *****       | *****      | *****       | *****      |
|              | .... ....  | .... ....  | .... ....   | .... ....  | .... ....   | .... ....  |
|              | 2645       | 2655       | 2665        | 2675       | 2685        | 2695       |
| 2d_SalI_Ge   | AATGAATATA | AGCAGGATGA | AGGTAAGCTC  | CAAACATATA | AAGGTAGTAT  | AAATGAAAGA |
| 2dtr_Thai    | AATGAATATA | AGCAGGATGA | AGGTAAGCTC  | CAAACATATA | AAGGTAGTAT  | AAATGAAAGA |
| Conservation | *****      | *****      | *****       | *****      | *****       | *****      |
|              | .... ....  | .... ....  | .... ....   | .... ....  | .... ....   | .... ....  |
|              | 2705       | 2715       | 2725        | 2735       | 2745        | 2755       |
| 2d_SalI_Ge   | AAAGACAAAT | TCCTCAATAC | TTCAAGCGAA  | AAAGAGGAAG | ATATTCCAGA  | GGGACAAAAT |
| 2dtr_Thai    | AAAGACAAAT | TCCTCAATAC | TTCAAGCGAA  | AAAGAGGAAG | ATATTCCAGA  | GGGACAAAAT |
| Conservation | *****      | *****      | *****       | *****      | *****       | *****      |
|              | .... ....  | .... ....  | .... ....   | .... ....  | .... ....   | .... ....  |
|              | 2765       | 2775       | 2785        | 2795       | 2805        | 2815       |
| 2d_SalI_Ge   | ATTTATGATG | AATATAAAAG | TCATAAAGAT  | CTTATGGTTA | ACAAAGAACT  | TAAATTATCC |
| 2dtr_Thai    | ATTTATGATG | AATATAAAAG | TCATAAAGAT  | CTTATGGTTA | ACAAAGAACT  | TAAATTATCC |
| Conservation | *****      | *****      | *****       | *****      | *****       | *****      |
|              | .... ....  | .... ....  | .... ....   | .... ....  | .... ....   | .... ....  |
|              | 2825       | 2835       | 2845        | 2855       | 2865        | 2875       |
| 2d_SalI_Ge   | AGTGATATTA | ATGAATTCAA | GGAAAAATATA | AAAAAAGTCC | AAACAAAAAT  | AGAGGCCTTC |
| 2dtr_Thai    | AGTGATATTA | ATGAATTCAA | GGAAAAATATA | AAAAAAGTCC | AAACAAAAAT  | AGAGGCCTTC |
| Conservation | *****      | *****      | *****       | *****      | *****       | *****      |
|              | .... ....  | .... ....  | .... ....   | .... ....  | .... ....   | .... ....  |
|              | 2885       | 2895       | 2905        | 2915       | 2925        | 2935       |
| 2d_SalI_Ge   | AGCAGTGTA  | TGCAAAAATT | AGGAGCGAAC  | GCCGATGAAC | AACATCAAGA  | AACTATAAAT |
| 2dtr_Thai    | AGCAGTGTA  | TGCAAAAATT | AGGAGCGAAC  | GCCGATGAAC | AACATCAAGA  | AACTATAAAT |
| Conservation | *****      | *****      | *****       | *****      | *****       | *****      |
|              | .... ....  | .... ....  | .... ....   | .... ....  | .... ....   | .... ....  |
|              | 2945       | 2955       | 2965        | 2975       | 2985        | 2995       |
| 2d_SalI_Ge   | TCTTTGAAGA | ACTTTAATAC | TAAAATCGAA  | GGTTTAAAAT | TAAGTGAACT  | TGAAGGTGAA |
| 2dtr_Thai    | TCTTTGAAGA | ACTTTAATAC | TAAAATCGAA  | GGTTTAAAAT | TAAGTGAACT  | TGAAGGTGAA |
| Conservation | *****      | *****      | *****       | *****      | *****       | *****      |

|              |            |            |             |            |            |            |
|--------------|------------|------------|-------------|------------|------------|------------|
|              | .... ....  | .... ....  | .... ....   | .... ....  | .... ....  | .... ....  |
|              | 3005       | 3015       | 3025        | 3035       | 3045       | 3055       |
| 2d_SalI_Ge   | TTTAAATTA  | ACAATGAATC | AGCTGCCAAA  | TTATATAATC | AAATTGAAAA | TACAATGAAA |
| 2dtr_Thai    | TTTAAATTA  | ACAATGAATC | AGCTGCCAAA  | TTATATAATC | AAATTGAAAA | TACAATGAAA |
| Conservation | *****      | *****      | *****       | *****      | *****      | *****      |
|              | .... ....  | .... ....  | .... ....   | .... ....  | .... ....  | .... ....  |
|              | 3065       | 3075       | 3085        | 3095       | 3105       | 3115       |
| 2d_SalI_Ge   | AATATAGACA | CAATTAAATC | CTTAAATTAT  | ACTAGAAACA | GCGCCAACAA | TAGCAGAGAA |
| 2dtr_Thai    | AATATAGACA | CAATTAAATC | CTTAAATTAT  | ACTAGAAACA | GCGCCAACAA | TAGCAGAGAA |
| Conservation | *****      | *****      | *****       | *****      | *****      | *****      |
|              | .... ....  | .... ....  | .... ....   | .... ....  | .... ....  | .... ....  |
|              | 3125       | 3135       | 3145        | 3155       | 3165       | 3175       |
| 2d_SalI_Ge   | TTAATGGTAA | AAATAGTAAA | AGATAAAAAAT | GATTTAATAA | AAAAACTAGA | TCAACAGTCT |
| 2dtr_Thai    | TTAATGGAAA | AAATAGTAAA | AGATAAAAAAT | GATTTAATAA | AAAAACTAGA | TCAACAGTCT |
| Conservation | *****:*    | *****      | *****       | *****      | *****      | *****      |
|              | .... ....  | .... ....  | .... ....   | .... ....  | .... ....  | .... ....  |
|              | 3185       | 3195       | 3205        | 3215       | 3225       | 3235       |
| 2d_SalI_Ge   | GAAGAAATAA | AACAATACAC | ATTAATAGAA  | GAAAAAGAAA | AGTCACCCCT | TCTAAGCGCT |
| 2dtr_Thai    | GAAGAAATAA | AACAATACAC | ATTAATAGAA  | GAAGAGAAA  | AGTCACCCCT | TCTAAGCGCT |
| Conservation | *****      | *****      | *****       | ***,*****  | *****      | *****      |
|              | .... ....  | .... ....  | .... ....   | .... ....  | .... ....  | .... ....  |
|              | 3245       | 3255       | 3265        | 3275       | 3285       | 3295       |
| 2d_SalI_Ge   | TTAAATGAAG | AACAAAATCA | TGTAGAAAGT  | GAAATTCCTA | AAGAGTCGAT | AGACAAATTA |
| 2dtr_Thai    | TTAAATGAAG | AACAAAATCA | TGTAGAAAGT  | GAAATTCCTA | AAGAGTCGAT | AGACAAATTA |
| Conservation | *****      | *****      | *****       | *****      | *****      | *****      |
|              | .... ....  | .... ....  | .... ....   | .... ....  | .... ....  | .... ....  |
|              | 3305       | 3315       | 3325        | 3335       | 3345       | 3355       |
| 2d_SalI_Ge   | AACACAGAAA | TAAATGCTAT | ACTGGAATAT  | TACAACAGTT | CAAAGGGTAA | TTTTAATGAG |
| 2dtr_Thai    | AACACAGAAA | TAAATGCTAT | ACTGGAATAT  | TACAACAGTT | CAAAGGGTAA | TTTTAATGAG |
| Conservation | *****      | *****      | *****       | *****      | *****      | *****      |
|              | .... ....  | .... ....  | .... ....   | .... ....  | .... ....  | .... ....  |
|              | 3365       | 3375       | 3385        | 3395       | 3405       | 3415       |
| 2d_SalI_Ge   | GACACGGAAA | TAAAATTGGA | AAAGTTAGAC  | AATTTTAAAA | CTCAATGTGA | TAATATTAAG |
| 2dtr_Thai    | GACACGGAAA | TAAAATTGGA | AAAGTTAGAC  | AATTTTAAAA | CTCAATGTGA | TAATATTAAG |
| Conservation | *****      | *****      | *****       | *****      | *****      | *****      |
|              | .... ....  | .... ....  | .... ....   | .... ....  | .... ....  | .... ....  |
|              | 3425       | 3435       | 3445        | 3455       | 3465       | 3475       |
| 2d_SalI_Ge   | CAAGAAATAG | AAACATTAAA | CACTAAATAT  | AAAGTGTTAG | AAAAAAGGAT | AGACACCCTA |
| 2dtr_Thai    | CAATAAATAG | AAACATTAAA | CACTAAATAT  | AAAGTGTTAG | AAAAAAGGAT | AGACACCCTA |
| Conservation | *** *****  | *****      | *****       | *****      | *****      | *****      |
|              | .... ....  | .... ....  | .... ....   | .... ....  | .... ....  | .... ....  |
|              | 3485       | 3495       | 3505        | 3515       | 3525       | 3535       |
| 2d_SalI_Ge   | ATTGATGAAC | AACATGCTAA | AATTGTGACG  | TTGACAGATA | AGCACATAAC | AACCAAAGAT |
| 2dtr_Thai    | ATTGATGAAC | AACATGCTAA | AATTGTGACG  | TTGACAGATA | AGCACATAAC | AACCAAAGAT |
| Conservation | *****      | *****      | *****       | *****      | *****      | *****      |
|              | .... ....  | .... ....  | .... ....   | .... ....  | .... ....  | .... ....  |
|              | 3545       | 3555       | 3565        | 3575       | 3585       | 3595       |
| 2d_SalI_Ge   | AATATGATTA | ATCAAAAGAT | TGAACATAGC  | ACAAAATCGC | TAGATGATAT | GAAAATAAG  |
| 2dtr_Thai    | AATATGATTA | ATCAAAAGAT | TGAACATAGC  | ACAAAATCGC | TAGATGATAT | GAAAATAAG  |
| Conservation | *****      | *****      | *****       | *****      | *****      | *****      |

|              |            |            |            |            |             |             |
|--------------|------------|------------|------------|------------|-------------|-------------|
|              | .... ....  | .... ....  | .... ....  | .... ....  | .... ....   | .... ....   |
|              | 3605       | 3615       | 3625       | 3635       | 3645        | 3655        |
| 2d_SalI_Ge   | TTGAATTCTC | TCAAATTTAA | CGATGATATC | AGAAAGAATG | AAAATGTCTGA | AATTC AAGGT |
| 2dtr_Thai    | TTGAATTCTC | TCAAATTTAA | CGATGATATC | AGAAAGAATG | AAAATGTCTGA | AATTC AAGGT |
| Conservation | *****      | *****      | *****      | *****      | *****       | *****       |
|              | .... ....  | .... ....  | .... ....  | .... ....  | .... ....   | .... ....   |
|              | 3665       | 3675       | 3685       | 3695       | 3705        | 3715        |
| 2d_SalI_Ge   | AAAATACAGG | AATTTGAAAA | AATGGTTCAA | ACTATAGAGG | AAAGTATAAA  | TAAAAATAAA  |
| 2dtr_Thai    | AAAATACAGG | AATTTGAAAA | AATGGTTCAA | ACTATAGAGG | AAAGTATAAA  | TAAAAATAAA  |
| Conservation | *****      | *****      | *****      | *****      | *****       | *****       |
|              | .... ....  | .... ....  | .... ....  | .... ....  | .... ....   | .... ....   |
|              | 3725       | 3735       | 3745       | 3755       | 3765        | 3775        |
| 2d_SalI_Ge   | ACTAAAATAT | ATGAAATTAA | AGGAGTATAC | GATGTGTACA | AGGGTGAATT  | CAATGAAGAA  |
| 2dtr_Thai    | ACTAAAATAT | ATGAAATTAA | AGGAGTATAC | GATGTGTACA | AGGGTGAATT  | CAATGAAGAA  |
| Conservation | *****      | *****      | *****      | *****      | *****       | *****       |
|              | .... ....  | .... ....  | .... ....  | .... ....  | .... ....   | .... ....   |
|              | 3785       | 3795       | 3805       | 3815       | 3825        | 3835        |
| 2d_SalI_Ge   | AAAAATAAAA | GCACAAAAAT | CGTAGAAAAA | AAAAATAGCA | TGGAAAAAGT  | TTATAACAAA  |
| 2dtr_Thai    | AAAAATAAAA | GCACAAAAAT | CGTAGAAAAA | AAAAATAGCA | TGGAAAAAGT  | TTATAACAAA  |
| Conservation | *****      | *****      | *****      | *****      | *****       | *****       |
|              | .... ....  | .... ....  | .... ....  | .... ....  | .... ....   | .... ....   |
|              | 3845       | 3855       | 3865       | 3875       | 3885        | 3895        |
| 2d_SalI_Ge   | ATGGAAGATA | CTCTTAAAAA | ATTAGAAGAT | ATAGATAACG | AAAAAAATAT  | ATTAAATGAA  |
| 2dtr_Thai    | ATGGAAGATA | CTCTTAAAAA | ATTAGAAGAT | ATAGATAACG | AAAAAAATAT  | ATTAAATGAA  |
| Conservation | *****      | *****      | *****      | *****      | *****       | *****       |
|              | .... ....  | .... ....  | .... ....  | .... ....  | .... ....   | .... ....   |
|              | 3905       | 3915       | 3925       | 3935       | 3945        | 3955        |
| 2d_SalI_Ge   | ATAGAAAAGG | CTGAAGTACT | ATACAGGAAA | GTTTTCATTC | ATAATACTGT  | TCATATGATG  |
| 2dtr_Thai    | ATAGAAAAGG | CTGAAGTACT | ATACAGGAAA | GTTTTCATTC | ATAATACTGT  | TCATATGATG  |
| Conservation | *****      | *****      | *****      | *****      | *****       | *****       |
|              | .... ....  | .... ....  | .... ....  | .... ....  | .... ....   | .... ....   |
|              | 3965       | 3975       | 3985       | 3995       | 4005        | 4015        |
| 2d_SalI_Ge   | GATAATGAAA | CTAAAAAGTC | TAAAAATTTG | ATGGACCAAA | TCGAATTGTC  | TAAAAAGAGAA |
| 2dtr_Thai    | GATAATGAAA | CTAAAAAGTC | TAAAAATTTG | ATGGACCAAA | TCGAATTGTC  | TAAAAAGAGAA |
| Conservation | *****      | *****      | *****      | *****      | *****       | *****       |
|              | .... ....  | .... ....  | .... ....  | .... ....  | .... ....   | .... ....   |
|              | 4025       | 4035       | 4045       | 4055       | 4065        | 4075        |
| 2d_SalI_Ge   | ATTGAGGAAA | CAAAGAAGCA | AATGCTTGAA | TACAAAAATG | ATGAGGTATC  | TAATTATGAT  |
| 2dtr_Thai    | ATTGAGGAAA | CAAAGAAGCA | AATGCTTGAA | TACAAAAATG | ATGAGGTATC  | TAATTATGAT  |
| Conservation | *****      | *****      | *****      | *****      | *****       | *****       |
|              | .... ....  | .... ....  | .... ....  | .... ....  | .... ....   | .... ....   |
|              | 4085       | 4095       | 4105       | 4115       | 4125        | 4135        |
| 2d_SalI_Ge   | TATATGAAAT | ATTACAACCA | GGCTACAGAG | AGTAATGCTA | AAATAAAAGA  | AACTTTTAAA  |
| 2dtr_Thai    | TATATGAAAT | ATTACAACCA | GGCTACAGAG | AGTAATGCTA | AAATAAAAGA  | AACTTTTAAA  |
| Conservation | *****      | *****      | *****      | *****      | *****       | *****       |
|              | .... ....  | .... ....  | .... ....  | .... ....  | .... ....   | .... ....   |
|              | 4145       | 4155       | 4165       | 4175       | 4185        | 4195        |
| 2d_SalI_Ge   | AATGCTACAG | ATAAGAAAAG | AAAGGCTGAA | AATATCGAAA | AAGTAAGTGA  | AATCGATGAC  |
| 2dtr_Thai    | AATGCTACAG | ATCAGAAAGA | AAAGGCTGAA | AATATCGAAA | AAGTAAGTGA  | AATCGATGAC  |
| Conservation | *****      | *****      | *****      | *****      | *****       | *****       |

|              |             |            |            |            |             |            |
|--------------|-------------|------------|------------|------------|-------------|------------|
|              | .... ....   | .... ....  | .... ....  | .... ....  | .... ....   | .... ....  |
|              | 4205        | 4215       | 4225       | 4235       | 4245        | 4255       |
| 2d_SalI_Ge   | ATTA AAAACC | AAGTTAATCA | TAATTTACAT | CAGATCCAAT | CAGAAAATAG  | TTCTATAGAG |
| 2dtr_Thai    | ATTA AAAACC | AAGTTAATCA | TAATTTACAT | CAGATCCAAT | CAGAAAATAG  | TTCTATAGAG |
| Conservation | *****       | *****      | *****      | *****      | *****       | *****      |
|              |             |            |            |            |             |            |
|              | .... ....   | .... ....  | .... ....  | .... ....  | .... ....   | .... ....  |
|              | 4265        | 4275       | 4285       | 4295       | 4305        | 4315       |
| 2d_SalI_Ge   | GAGATGTTAA  | AACAAATTAA | TAATATGAAA | GATTTATTAA | AAACGAACAG  | TTCTAAAGGA |
| 2dtr_Thai    | GAGATGTTAA  | AACAAATTAA | TAATATGAAA | GATTTATTAA | AAACGAACAG  | TTCTAAAGGA |
| Conservation | *****       | *****      | *****      | *****      | *****       | *****      |
|              |             |            |            |            |             |            |
|              | .... ....   | .... ....  | .... ....  | .... ....  | .... ....   | .... ....  |
|              | 4325        | 4335       | 4345       | 4355       | 4365        | 4375       |
| 2d_SalI_Ge   | ATATCGGATA  | CAGTATTAAG | TAGTACCAAA | AATGCAGAAG | AATTTGGCAA  | ACAAGCAATA |
| 2dtr_Thai    | ATATCGGATA  | CAGTATTAAG | TAGTACCAAA | AATGCAGAAG | AATTTGGCAA  | ACAAGCAATA |
| Conservation | *****       | *****      | *****      | *****      | *****       | *****      |
|              |             |            |            |            |             |            |
|              | .... ....   | .... ....  | .... ....  | .... ....  | .... ....   | .... ....  |
|              | 4385        | 4395       | 4405       | 4415       | 4425        | 4435       |
| 2d_SalI_Ge   | AGTGAATTTA  | ATAAAACGAA | TGATGTAATA | CAAGCAATCA | GAGATTTGAT  | AACTAAGGCT |
| 2dtr_Thai    | AGTGAATTTA  | ATAAAACGAA | TGATGTAATA | CAAGCAATCA | GAGATTTGAT  | AACTAAGGCT |
| Conservation | *****       | *****      | *****      | *****      | *****       | *****      |
|              |             |            |            |            |             |            |
|              | .... ....   | .... ....  | .... ....  | .... ....  | .... ....   | .... ....  |
|              | 4445        | 4455       | 4465       | 4475       | 4485        | 4495       |
| 2d_SalI_Ge   | GAAGCACATA  | AAAATTTAAT | CAATATAAAT | TTAGAAGATG | AAAAAATAAA  | TGCCGAAGTG |
| 2dtr_Thai    | GAAGCACATA  | AAAATTTAAT | CAATATAAAT | TTAGAAGATG | AAAAAATAAA  | TGCCGAAGTG |
| Conservation | *****       | *****      | *****      | *****      | *****       | *****      |
|              |             |            |            |            |             |            |
|              | .... ....   | .... ....  | .... ....  | .... ....  | .... ....   | .... ....  |
|              | 4505        | 4515       | 4525       | 4535       | 4545        | 4555       |
| 2d_SalI_Ge   | AAAGAAATTG  | AAAAAATTAA | GGAACAAATT | GCCAATAAGA | AAGAAGAAAT  | AGAATCCCAT |
| 2dtr_Thai    | AAAGAAATTG  | AAAAAATTAA | GGAACAAATT | GCCAATAAGA | AAGAAGAAAT  | AGAATCCCAT |
| Conservation | *****       | *****      | *****      | *****      | *****       | *****      |
|              |             |            |            |            |             |            |
|              | .... ....   | .... ....  | .... ....  | .... ....  | .... ....   | .... ....  |
|              | 4565        | 4575       | 4585       | 4595       | 4605        | 4615       |
| 2d_SalI_Ge   | CTGAGCAAGG  | CAAAGAATT  | TAAAGAAAAA | TGTTCTCAG  | AAACAAGTAA  | CGCCAAAAGA |
| 2dtr_Thai    | CTGAGCAAGG  | CAAAGAATT  | TAAAGAAAAA | TGTTCTCAG  | AAACAAGTAA  | CGCCAAAAGA |
| Conservation | *****       | *****      | *****      | *****      | *****       | *****      |
|              |             |            |            |            |             |            |
|              | .... ....   | .... ....  | .... ....  | .... ....  | .... ....   | .... ....  |
|              | 4625        | 4635       | 4645       | 4655       | 4665        | 4675       |
| 2d_SalI_Ge   | GGTAAAAGTA  | AAATAGAATT | TTTGCAAAGT | CGTGAAGGCA | GTTTCGGAAGA | GGTAGATATG |
| 2dtr_Thai    | GGTAAAAGTA  | AAATAGAATT | TTTGCAAAGT | CGTGAAGGCA | GTTTCGGAAGA | GGTAGATATG |
| Conservation | *****       | *****      | *****      | *****      | *****       | *****      |
|              |             |            |            |            |             |            |
|              | .... ....   | .... ....  | .... ....  | .... ....  | .... ....   | .... ....  |
|              | 4685        | 4695       | 4705       | 4715       | 4725        | 4735       |
| 2d_SalI_Ge   | AAGGAGATAG  | AAGAAAATAT | TACCAAAGCA | GAAGGATATT | TAAATCAAGC  | CATTGCTGCA |
| 2dtr_Thai    | AAGGAGATAG  | AAGAAAATAT | TACCAAAGCA | GAAGGATATT | TAAATCAAGC  | CATTGCTGCA |
| Conservation | *****       | *****      | *****      | *****      | *****       | *****      |
|              |             |            |            |            |             |            |
|              | .... ....   | .... ....  | .... ....  | .... ....  | .... ....   | .... ....  |
|              | 4745        | 4755       | 4765       | 4775       | 4785        | 4795       |
| 2d_SalI_Ge   | GAAACAGAAG  | CTAATAAGAA | TGTAGAATTG | TTCGGTGAAC | TTCAAAAAAA  | TATCTGTGAC |
| 2dtr_Thai    | GAAACAGAAG  | CTAATAAGAA | TGTAGAATTG | TTCGGTGAAC | TTCAAAAAAA  | TATCTGTGAC |
| Conservation | *****       | *****      | *****      | *****      | *****       | *****      |

|              |             |            |              |            |             |            |
|--------------|-------------|------------|--------------|------------|-------------|------------|
|              | .... ....   | .... ....  | .... ....    | .... ....  | .... ....   | .... ....  |
|              | 4805        | 4815       | 4825         | 4835       | 4845        | 4855       |
| 2d_SalI_Ge   | ATTTTCGATG  | AATCATCAAT | TTTAGGAATA   | GAGACTACAT | CAAAGAAAAA  | AATTAATAAA |
| 2dtr_Thai    | ATTTTCGATG  | AATCATCAAT | TTTAGGAATA   | GAGACTACAT | CAAAGAAAAA  | AATTAATAAA |
| Conservation | *****       | *****      | *****        | *****      | *****       | *****      |
|              | .... ....   | .... ....  | .... ....    | .... ....  | .... ....   | .... ....  |
|              | 4865        | 4875       | 4885         | 4895       | 4905        | 4915       |
| 2d_SalI_Ge   | GCAACAGAAA  | TAATGGAAGA | AATTA AAAAGG | AAAAATTTTG | AAATTC AAGG | CGAGGTGAAA |
| 2dtr_Thai    | GCAACAGAAA  | TAATGGAAGA | AATTA AAAAGG | AAAAATTTTG | AAATTC AAGG | CGAGGTGAAA |
| Conservation | *****       | *****      | *****        | *****      | *****       | *****      |
|              | .... ....   | .... ....  | .... ....    | .... ....  | .... ....   | .... ....  |
|              | 4925        | 4935       | 4945         | 4955       | 4965        | 4975       |
| 2d_SalI_Ge   | ATTTTCCATG  | AAACACTCGT | TAAATTGAAA   | GAAACACACC | CTGATAACAA  | CGTAGATGCT |
| 2dtr_Thai    | ATTTTCCATG  | AAACACTCGT | TAAATTGAAA   | GAAACACACC | CTGATAACAA  | CGTAGATGCT |
| Conservation | *****       | *****      | *****        | *****      | *****       | *****      |
|              | .... ....   | .... ....  | .... ....    | .... ....  | .... ....   | .... ....  |
|              | 4985        | 4995       | 5005         | 5015       | 5025        | 5035       |
| 2d_SalI_Ge   | GAACTTAAACA | ATGCGAAATC | GACCAATGCA   | AATGTACTTA | TACAAACTAA  | CCTAGAAATG |
| 2dtr_Thai    | GAACTTAAACA | ATGCGAAATC | GACCAATGCA   | AATGTACTTA | TACAAACTAA  | CCTAGAAATG |
| Conservation | *****       | *****      | *****        | *****      | *****       | *****      |
|              | .... ....   | .... ....  | .... ....    | .... ....  | .... ....   | .... ....  |
|              | 5045        | 5055       | 5065         | 5075       | 5085        | 5095       |
| 2d_SalI_Ge   | GTGGAACATA  | ACTTATCCGT | AATAGCTAAA   | ATTAACAGG  | AGGGAGAAAA  | TATATATAAT |
| 2dtr_Thai    | GTGGAACATA  | ACTTATCCGT | AATAGCTAAA   | ATTAACAGG  | AGGGAGAAAA  | TATATATAAT |
| Conservation | *****       | *****      | *****        | *****      | *****       | *****      |
|              | .... ....   | .... ....  | .... ....    | .... ....  | .... ....   | .... ....  |
|              | 5105        | 5115       | 5125         | 5135       | 5145        | 5155       |
| 2d_SalI_Ge   | AGAGCCTCAT  | CTACGATAAA | TTCCATGACA   | GAAATCTCCA | AAAATACTGA  | AAAAAAAACA |
| 2dtr_Thai    | AGAGCCTCAT  | CTACGATAAA | TTCCATGACA   | GAAATCTCCA | AAAATACTGA  | AAAAAAAACA |
| Conservation | *****       | *****      | *****        | *****      | *****       | *****      |
|              | .... ....   | .... ....  | .... ....    | .... ....  | .... ....   | .... ....  |
|              | 5165        | 5175       | 5185         | 5195       | 5205        | 5215       |
| 2d_SalI_Ge   | TTAGACAAGG  | CAAAAAGTGA | CGAATCTAAA   | TATATATCCT | ATTTAACCAA  | AATAACTTCA |
| 2dtr_Thai    | TTAGACAAGG  | CAAAAAGTGA | CGAATCTAAA   | TATATATCCT | ATTTAACCAA  | AATAACTTCA |
| Conservation | *****       | *****      | *****        | *****      | *****       | *****      |
|              | .... ....   | .... ....  | .... ....    | .... ....  | .... ....   | .... ....  |
|              | 5225        | 5235       | 5245         | 5255       | 5265        | 5275       |
| 2d_SalI_Ge   | GAAAGAGATC  | TAATCATTGA | AGAAAGGAAT   | AAACTAAATG | GTATAAGCCC  | CAATATAATA |
| 2dtr_Thai    | GAAAGAAATC  | TAATCATTGA | AGAAAGGAAT   | AAACTAAATG | GTATAAGCCC  | CAATATAATA |
| Conservation | *****       | *****      | *****        | *****      | *****       | *****      |
|              | .... ....   | .... ....  | .... ....    | .... ....  | .... ....   | .... ....  |
|              | 5285        | 5295       | 5305         | 5315       | 5325        | 5335       |
| 2d_SalI_Ge   | AGTATAGAAA  | AGGAATTGAA | TAAAGCCAGA   | AAGGATTACG | AAATGGACT   | TTTGCAAAAG |
| 2dtr_Thai    | AGTATAGAAA  | AGGAATTGAA | TAAAGCCAGA   | AAGGATTACG | AAATGGACT   | TTTGCAAAAG |
| Conservation | *****       | *****      | *****        | *****      | *****       | *****      |
|              | .... ....   | .... ....  | .... ....    | .... ....  | .... ....   | .... ....  |
|              | 5345        | 5355       | 5365         | 5375       | 5385        | 5395       |
| 2d_SalI_Ge   | ATAGATGAAA  | TAGGCAAAAA | CAGAAAAAAA   | GAATATTGAT | TTGACAAAAG  | AATCAATAAA |
| 2dtr_Thai    | ATAGATGAAA  | TAGGCAAAAA | CAGAAAAAAA   | -AATATTGAT | TTGACAAAAG  | AATCAATAAA |
| Conservation | *****       | *****      | *****        | *****      | *****       | *****      |

|              |            |            |            |             |            |             |
|--------------|------------|------------|------------|-------------|------------|-------------|
|              | .... ....  | .... ....  | .... ....  | .... ....   | .... ....  | .... ....   |
|              | 5405       | 5415       | 5425       | 5435        | 5445       | 5455        |
| 2d_SalI_Ge   | ATTAACATTG | AGCAACTTTT | CTTCCCATT  | CAAAGGATTT  | GATTTAAAGG | AATATGTCTT  |
| 2dtr_Thai    | ATTAACATTG | AGCAACTTTT | CTTCCCATT  | CAAAGGATTT  | GATTTAAAGG | AATATGTCTT  |
| Conservation | *****      | *****      | *****      | *****       | *****      | *****       |
|              | .... ....  | .... ....  | .... ....  | .... ....   | .... ....  | .... ....   |
|              | 5465       | 5475       | 5485       | 5495        | 5505       | 5515        |
| 2d_SalI_Ge   | TAATAAAAAT | ATAAATGACT | ATGAACAAAA | GATGAAAGAA  | ATACATGACA | AATATGACAA  |
| 2dtr_Thai    | TAATAAAAAT | ATAAATGACT | ATGAACAAAA | GATGAAAGAA  | ATACATGACA | AATATGACAA  |
| Conservation | *****      | *****      | *****      | *****       | *****      | *****       |
|              | .... ....  | .... ....  | .... ....  | .... ....   | .... ....  | .... ....   |
|              | 5525       | 5535       | 5545       | 5555        | 5565       | 5575        |
| 2d_SalI_Ge   | ATCGATAAAT | AAAATTAGTA | AAAACTTGAA | AAAGGCTGAA  | GAGGATAATA | CAAACATATAC |
| 2dtr_Thai    | ATCGATAAAT | AAAATTAGTA | AAAACTTGAA | AAAGGCTGAA  | GAGGATAATA | CAAACATATAC |
| Conservation | *****      | *****      | *****      | *****       | *****      | *****       |
|              | .... ....  | .... ....  | .... ....  | .... ....   | .... ....  | .... ....   |
|              | 5585       | 5595       | 5605       | 5615        | 5625       | 5635        |
| 2d_SalI_Ge   | CCTAGCGAAT | GAGCTGAGGA | AAGAAGCGCA | ACAAGAAAAA  | GCAGAACTTA | CAAATATACA  |
| 2dtr_Thai    | CCTAGCGAAT | GAGCTGAGGA | AAGAAGCGCA | ACAAGAAAAA  | GCAGAACTTA | CAAATATACA  |
| Conservation | *****      | *****      | *****      | *****       | *****      | *****       |
|              | .... ....  | .... ....  | .... ....  | .... ....   | .... ....  | .... ....   |
|              | 5645       | 5655       | 5665       | 5675        | 5685       | 5695        |
| 2d_SalI_Ge   | AGAAGAAGTA | AATAAATATT | TAAGGGATAT | AAAAAAATGG  | GAATCATTCA | GATTTATACT  |
| 2dtr_Thai    | AGAAGAAGTA | AATAAATATT | TAAGGGATAT | AAAAAAATGG  | GAATCATTCA | GATTTATACT  |
| Conservation | *****      | *****      | *****      | *****       | *****      | *****       |
|              | .... ....  | .... ....  | .... ....  | .... ....   | .... ....  | .... ....   |
|              | 5705       | 5715       | 5725       | 5735        | 5745       | 5755        |
| 2d_SalI_Ge   | TGATATGAAA | GACAATTTAA | GTAATATAAA | TACTACTGATT | AAACAAGAAG | AATTAAAGGT  |
| 2dtr_Thai    | TGATATGAAA | GACAATTTAA | GTAATATAAA | TACTACTGATT | AAACAAGAAG | AATTAAAGGT  |
| Conservation | *****      | *****      | *****      | *****       | *****      | *****       |
|              | .... ....  | .... ....  | .... ....  | .... ....   | .... ....  | .... ....   |
|              | 5765       | 5775       | 5785       | 5795        | 5805       | 5815        |
| 2d_SalI_Ge   | TAATGATGGA | TATGAATACA | TTAAACAATT | AGTTGACAAT  | ATTAAAGAGT | CAAATGATGA  |
| 2dtr_Thai    | TAATGATGGA | TATGAATACA | TTAAACAATT | AGTTGACAAT  | ATTAAAGAGT | CAAATGATGA  |
| Conservation | *****      | *****      | *****      | *****       | *****      | *****       |
|              | .... ....  | .... ....  | .... ....  | .... ....   | .... ....  | .... ....   |
|              | 5825       | 5835       | 5845       | 5855        | 5865       | 5875        |
| 2d_SalI_Ge   | AAGCAGTATA | TCAGATAAAT | TACAAAAAGG | AAAAGAAAAA  | AATGTAGAAA | TACAGAACAA  |
| 2dtr_Thai    | AAGCAGTATA | TCAGATAAAT | TACAAAAAGG | AAAAGAAAAA  | AATGTAGAAA | TACAGAACAA  |
| Conservation | *****      | *****      | *****      | *****       | *****      | *****       |
|              | .... ....  | .... ....  | .... ....  | .... ....   | .... ....  | .... ....   |
|              | 5885       | 5895       | 5905       | 5915        | 5925       | 5935        |
| 2d_SalI_Ge   | AATGCAATCT | ACGTATAAAA | ACAAGGCAAA | AGTTATTTTA  | GGACATATAA | TTGACTCCGC  |
| 2dtr_Thai    | AATGCAATCT | ACGTATAAAA | ACAAGGCAAA | AGTTATTTTA  | GGACATATAA | TTGACTCCGC  |
| Conservation | *****      | *****      | *****      | *****       | *****      | *****       |
|              | .... ....  | .... ....  | .... ....  | .... ....   | .... ....  | .... ....   |
|              | 5945       | 5955       | 5965       | 5975        | 5985       | 5995        |
| 2d_SalI_Ge   | AAAATTTATA | GATATTAATA | TAATTACAAA | ATCACCCTA   | AACGAATTGT | CTTCAGAATC  |
| 2dtr_Thai    | AAAATTTATA | GATATTAATA | TAATTACAAA | ATCACCCTA   | AACGAATTGT | CTTCAGAATC  |
| Conservation | *****      | *****      | *****      | *****       | *****      | *****       |

|              |             |            |            |            |             |            |
|--------------|-------------|------------|------------|------------|-------------|------------|
|              | .... ....   | .... ....  | .... ....  | .... ....  | .... ....   | .... ....  |
|              | 6005        | 6015       | 6025       | 6035       | 6045        | 6055       |
| 2d_SalI_Ge   | ACATTTGATG  | AATGCAGGAG | AATTTAAATT | TCAGCAAGAA | AATAAAGTAA  | CATTAGAAAC |
| 2dtr_Thai    | ACATTTGATG  | AATGCAGGAG | AATTTAAATT | TCAGCAAGAA | AATAAAGTAA  | CATTAGAAAC |
| Conservation | *****       | *****      | *****      | *****      | *****       | *****      |
|              | .... ....   | .... ....  | .... ....  | .... ....  | .... ....   | .... ....  |
|              | 6065        | 6075       | 6085       | 6095       | 6105        | 6115       |
| 2d_SalI_Ge   | AGAACATATG  | ACAAACAATA | AGAGCGAATT | AGATGTTTAT | AAAAATATAC  | GCGATGCTTA |
| 2dtr_Thai    | AGAACATATG  | ACAAACAATA | AGAGCGAATT | AGATGTTTAT | AAAAATATAC  | GCGATGCTTA |
| Conservation | *****       | *****      | *****      | *****      | *****       | *****      |
|              | .... ....   | .... ....  | .... ....  | .... ....  | .... ....   | .... ....  |
|              | 6125        | 6135       | 6145       | 6155       | 6165        | 6175       |
| 2d_SalI_Ge   | CAACATCGTT  | GTGGAGATAA | TTGCATATTC | AGATAAAATA | GACACAAAAC  | AAAGACAAAG |
| 2dtr_Thai    | CAACATCGTT  | GTGGAGATAA | TTGCATATTC | AGATAAAATA | GACACAAAAC  | AAAGACAAAG |
| Conservation | *****       | *****      | *****      | *****      | *****       | *****      |
|              | .... ....   | .... ....  | .... ....  | .... ....  | .... ....   | .... ....  |
|              | 6185        | 6195       | 6205       | 6215       | 6225        | 6235       |
| 2d_SalI_Ge   | TACACAATTA  | TTGGATGATG | GAAATGATAT | ATATCTTACG | CTAAAGTCAA  | TAAACGAGCT |
| 2dtr_Thai    | TACACAATTA  | TTGGATGATG | GAAATGATAT | ATATCTTACG | CTAAAGTCAA  | TAAACGAGCT |
| Conservation | *****       | *****      | *****      | *****      | *****       | *****      |
|              | .... ....   | .... ....  | .... ....  | .... ....  | .... ....   | .... ....  |
|              | 6245        | 6255       | 6265       | 6275       | 6285        | 6295       |
| 2d_SalI_Ge   | AAAAAATAAA  | ATAAACTCTG | TAAAAAGTAA | AGAAAATGCT | ATTTTCAGGCA | AAATAGATAA |
| 2dtr_Thai    | AAAAAATAAA  | ATAAACTCTG | TAAAAAGTAA | AGAAAATGCT | ATTTTCAGGCA | AAATAGATAA |
| Conservation | *****       | *****      | *****      | *****      | *****       | *****      |
|              | .... ....   | .... ....  | .... ....  | .... ....  | .... ....   | .... ....  |
|              | 6305        | 6315       | 6325       | 6335       | 6345        | 6355       |
| 2d_SalI_Ge   | TATTTCAAAC  | AAACTTAATG | AGTTAAACAA | AATTACATGT | GATGATAAAA  | GTTACGATAA |
| 2dtr_Thai    | TATTTCAAAC  | AAACTTAATG | AGTTAAACAA | AATTACATGT | GATGATAAAA  | GTTACGATAA |
| Conservation | *****       | *****      | *****      | *****      | *****       | *****      |
|              | .... ....   | .... ....  | .... ....  | .... ....  | .... ....   | .... ....  |
|              | 6365        | 6375       | 6385       | 6395       | 6405        | 6415       |
| 2d_SalI_Ge   | TATTTTtagac | ATAATAAAAC | ATACAGAATT | AAAAACTATA | CGTGATTCTT  | TTAAACAAGA |
| 2dtr_Thai    | TATTTTtagac | ATAATAAAAC | ATACAGAATT | AAAAACTATA | CGTGATTCTT  | TTAAACAAGA |
| Conservation | *****       | *****      | *****      | *****      | *****       | *****      |
|              | .... ....   | .... ....  | .... ....  | .... ....  | .... ....   | .... ....  |
|              | 6425        | 6435       | 6445       | 6455       | 6465        | 6475       |
| 2d_SalI_Ge   | AAAAATTAAC  | AAAAAGAGCG | ATTCTAAATT | GGAAAAAATA | AAGGAAGAAT  | TTGAAAATTC |
| 2dtr_Thai    | AAAAATTAAC  | AAAAAGAGCG | ATTCTAAATT | GGAAAAAATA | AAGGAAGAAT  | TTGAAAATTC |
| Conservation | *****       | *****      | *****      | *****      | *****       | *****      |
|              | .... ....   | .... ....  | .... ....  | .... ....  | .... ....   | .... ....  |
|              | 6485        | 6495       | 6505       | 6515       | 6525        | 6535       |
| 2d_SalI_Ge   | AAAAAATACA  | TTAAAAAATA | TAGAAGAAGA | AGTTAATGCT | CTAAAGGCTA  | GTTTGGTAAA |
| 2dtr_Thai    | AAAAAATACA  | TTAAAAAATA | TAGAAGAAGA | AGTTAATGCT | CTAAAGGCTA  | GTTTGGTAAA |
| Conservation | *****       | *****      | *****      | *****      | *****       | *****      |
|              | .... ....   | .... ....  | .... ....  | .... ....  | .... ....   | .... ....  |
|              | 6545        | 6555       | 6565       | 6575       | 6585        | 6595       |
| 2d_SalI_Ge   | ACATGATAAT  | ATACAAAGCA | GAAACAAGCC | AATTGATGAT | GTGCTAATCG  | AAATAGAAAA |
| 2dtr_Thai    | ACATGATAAT  | ATACAAAGCA | GAAACAAGCC | AATTGATGAT | GTGCTAATCG  | AAATAGAAAA |
| Conservation | *****       | *****      | *****      | *****      | *****       | *****      |

|              |            |            |            |            |            |            |
|--------------|------------|------------|------------|------------|------------|------------|
|              | .... ....  | .... ....  | .... ....  | .... ....  | .... ....  | .... ....  |
|              | 6605       | 6615       | 6625       | 6635       | 6645       | 6655       |
| 2d_SalI_Ge   | AACAGAAAAA | GGTATAGATA | GTTTTAGTGC | CTCCCTTGAT | GAGATGTTGA | AGAAAGGAAG |
| 2dtr_Thai    | AACAGAAAAA | GGTATAGATA | GTTTTAGTGC | CTCCCTTGAT | GAGATGTTGA | AGAAAGGAAG |
| Conservation | *****      | *****      | *****      | *****      | *****      | *****      |
|              | .... ....  | .... ....  | .... ....  | .... ....  | .... ....  | .... ....  |
|              | 6665       | 6675       | 6685       | 6695       | 6705       | 6715       |
| 2d_SalI_Ge   | AGAATGCGAA | ATATTTAGGT | ATACATCCAT | AAAAGATGGT | GTTATCGCAA | AAATAAATGA |
| 2dtr_Thai    | AGAATGCGAA | ATATTTAGGT | ATACATCCAT | AAAAGATGGT | GTTATCGCAA | AAATAAATGA |
| Conservation | *****      | *****      | *****      | *****      | *****      | *****      |
|              | .... ....  | .... ....  | .... ....  | .... ....  | .... ....  | .... ....  |
|              | 6725       | 6735       | 6745       | 6755       | 6765       | 6775       |
| 2d_SalI_Ge   | TGACGCAGAA | TTAATCGATA | ATATACACAA | TAATACTAAT | GAATATTTGA | CATATGTTCA |
| 2dtr_Thai    | TGACGCAGAA | TTAATCGATA | ATATACACAA | TAATACTAAT | GAATATTTGA | CATATGTTCA |
| Conservation | *****      | *****      | *****      | *****      | *****      | *****      |
|              | .... ....  | .... ....  | .... ....  | .... ....  | .... ....  | .... ....  |
|              | 6785       | 6795       | 6805       | 6815       | 6825       | 6835       |
| 2d_SalI_Ge   | AAAAAATTAT | AGTGAAACAG | CAGAGGATGT | TCGTACATTA | AATCAACATT | TCATGACAGA |
| 2dtr_Thai    | AAAAAATTAT | AGTGAAACAG | CAGAGGATGT | TCGCACATTA | AATCAACATT | TCATGACAGA |
| Conservation | *****      | *****      | *****      | *** *****  | *****      | *****      |
|              | .... ....  | .... ....  | .... ....  | .... ....  | .... ....  | .... ....  |
|              | 6845       | 6855       | 6865       | 6875       | 6885       | 6895       |
| 2d_SalI_Ge   | AACGATAAGC | GATCATGCGC | CAACTAATTA | CGAAACATCA | AATAAATCTT | ATGAAGAGAT |
| 2dtr_Thai    | AACGATAAGC | GATCATGCGC | CAACTAATTA | CGAAACATCA | AATAAATCTT | ATGAAGAGAT |
| Conservation | *****      | *****      | *****      | *****      | *****      | *****      |
|              | .... ....  | .... ....  | .... ....  | .... ....  | .... ....  | .... ....  |
|              | 6905       | 6915       | 6925       | 6935       | 6945       | 6955       |
| 2d_SalI_Ge   | AACTGAAGCT | GTTAATAAAT | CCAAAGCAAT | AATAGATAAT | ATACAAAATT | CAATTATACA |
| 2dtr_Thai    | AACTGAAGCT | GTTAATAAAT | CCAAAGCAAT | AATAGATAAT | ATACAAAATT | CAATTATACA |
| Conservation | *****      | *****      | *****      | *****      | *****      | *****      |
|              | .... ....  | .... ....  | .... ....  | .... ....  | .... ....  | .... ....  |
|              | 6965       | 6975       | 6985       | 6995       | 7005       | 7015       |
| 2d_SalI_Ge   | AGTTAACGAA | AAAACGGAAA | TTAGTTCTTT | AGAAAATAGC | GCAGAAAAAA | TAGAAAAGCT |
| 2dtr_Thai    | AGTTAACGAA | AAAACGGAAA | TTAGTTCTTT | AGAAAATAGC | GCAGAAAAAA | TAGAAAAGCT |
| Conservation | *****      | *****      | *****      | *****      | *****      | *****      |
|              | .... ....  | .... ....  | .... ....  | .... ....  | .... ....  | .... ....  |
|              | 7025       | 7035       | 7045       | 7055       | 7065       | 7075       |
| 2d_SalI_Ge   | TTATAAAGAA | TTACAGGATA | AAAAAAACAC | CATAAACGAA | ATTTATAAAA | AGGCTAACAT |
| 2dtr_Thai    | TTATAAAGAA | TTACAGGATA | AAAAAAACAC | CATAAACGAA | ATTTATAAAA | AGGCTAACAT |
| Conservation | *****      | *****      | *****      | *****      | *****      | *****      |
|              | .... ....  | .... ....  | .... ....  | .... ....  | .... ....  | .... ....  |
|              | 7085       | 7095       | 7105       | 7115       | 7125       | 7135       |
| 2d_SalI_Ge   | AGTTAAATTG | CAAGAAATAA | AATCAGATGC | TGATAAATAT | TTGGATGTAG | CTAACATATT |
| 2dtr_Thai    | AGTTAAATTG | CAAGAAATAA | AATCAGATGC | TGATAAATAT | TTGGATGTAG | CTAACATATT |
| Conservation | *****      | *****      | *****      | *****      | *****      | *****      |
|              | .... ....  | .... ....  | .... ....  | .... ....  | .... ....  | .... ....  |
|              | 7145       | 7155       | 7165       | 7175       | 7185       | 7195       |
| 2d_SalI_Ge   | TAATAATGTA | TTGGACGGTC | AAAAATCAAG | AATAATAAAT | AACCTAGGTA | AAATAGCCCA |
| 2dtr_Thai    | TAATAATGTA | TTGGACGGTC | AAAAATCAAG | AATAATAAAT | AACCTAGGTA | AAATAGCCCA |
| Conservation | *****      | *****      | *****      | *****      | *****      | *****      |



|              |            |            |            |            |            |            |
|--------------|------------|------------|------------|------------|------------|------------|
|              | .... ....  | .... ....  | .... ....  | .... ....  | .... ....  | .... ....  |
|              | 7205       | 7215       | 7225       | 7235       | 7245       | 7255       |
| 2d_SalI_Ge   | AGTTAAAGAA | ACAATAAACC | TAAAACTGAA | GAAATTGGTT | GAGACTGACA | ATACATTTAC |
| 2dtr_Thai    | AGTTAAAGAA | ACAATAAACC | TAAAACTGAA | GAAATTGGTT | GAGACTGACA | ATACATTTAC |
| Conservation | *****      | *****      | *****      | *****      | *****      | *****      |
|              | .... ....  | .... ....  | .... ....  | .... ....  | .... ....  | .... ....  |
|              | 7265       | 7275       | 7285       | 7295       | 7305       | 7315       |
| 2d_SalI_Ge   | GACAGAGTCT | ATTAACAGGT | TTGGAGAAAT | TTATAATGAC | ATTAAGACTA | GTATAGATGA |
| 2dtr_Thai    | GACAGAGTCT | ATTAACAGGT | TTGGAGAAAT | TTATAATGAC | ATTAAGACTA | GTATAGATGA |
| Conservation | *****      | *****      | *****      | *****      | *****      | *****      |
|              | .... ....  | .... ....  | .... ....  | .... ....  | .... ....  | .... ....  |
|              | 7325       | 7335       | 7345       | 7355       | 7365       | 7375       |
| 2d_SalI_Ge   | ACTGGAAATT | ATAGAACAAA | CAAATTATAG | CGAACAAAAT | GATGTAAAAA | ATCATAAAGA |
| 2dtr_Thai    | ACTGGAAATT | ATAGAACAAA | CAAATTATAG | CGAACAAAAT | GATGTAAAAA | ATCATAAAGA |
| Conservation | *****      | *****      | *****      | *****      | *****      | *****      |
|              | .... ....  | .... ....  | .... ....  | .... ....  | .... ....  | .... ....  |
|              | 7385       | 7395       | 7405       | 7415       | 7425       | 7435       |
| 2d_SalI_Ge   | AAAAATTACA | TACTTAATAA | GCAGAAGAGA | AACTTTAGAA | AGTGACCTAA | AAGGACATGA |
| 2dtr_Thai    | AAAAATTACA | TACTTAATAA | GCAGAAGAGA | AACTTTAGAA | AGTGACCTAA | AAGGACATGA |
| Conservation | *****      | *****      | *****      | *****      | *****      | *****      |
|              | .... ....  | .... ....  | .... ....  | .... ....  | .... ....  | .... ....  |
|              | 7445       | 7455       | 7465       | 7475       | 7485       | 7495       |
| 2d_SalI_Ge   | AGAGGACACA | AATGTGAAAA | AATTAAATGC | GAATACATTA | AGTGAAGTAA | ATATTGGCAT |
| 2dtr_Thai    | AGAGGACACA | AATGTGAAAA | AATTAAATGC | GAATACATTA | AGTGAAGTAA | ATATTGGCAT |
| Conservation | *****      | *****      | *****      | *****      | *****      | *****      |
|              | .... ....  | .... ....  | .... ....  | .... ....  | .... ....  | .... ....  |
|              | 7505       | 7515       | 7525       | 7535       | 7545       | 7555       |
| 2d_SalI_Ge   | TGCAAGTGCA | AAAGAAGCTA | TAAGCAACTC | AGAGGAAGTA | TTTAAGAAAT | TATTAAGAAA |
| 2dtr_Thai    | TGCAAGTGCA | AAAGAAGCTA | TAAGCAACTC | AGAGGAAGTA | TTTAAGAAAT | TATTAAGAAA |
| Conservation | *****      | *****      | *****      | *****      | *****      | *****      |
|              | .... ....  | .... ....  | .... ....  | .... ....  | .... ....  | .... ....  |
|              | 7565       | 7575       | 7585       | 7595       | 7605       | 7615       |
| 2d_SalI_Ge   | AATAGAAGAA | AATGAAAGAT | TATGTAATAA | TAATGATGCA | AAGAATTTTA | TTTCGGATAT |
| 2dtr_Thai    | AATAGAAGAA | AATGAAAGAT | TATGTAATAA | TAATGATGCA | AAGAATTTTA | TTTCGGATAT |
| Conservation | *****      | *****      | *****      | *****      | *****      | *****      |
|              | .... ....  | .... ....  | .... ....  | .... ....  | .... ....  | .... ....  |
|              | 7625       | 7635       | 7645       | 7655       | 7665       | 7675       |
| 2d_SalI_Ge   | TATGCAAAAT | ATAGATGATC | TGAATAAACG | TTTCACAAAA | AATATACCAG | AAAGAGAAAA |
| 2dtr_Thai    | TATGCAAAAT | ATAGATGATC | TGAATAAACG | TTTCACAAAA | AATATACCAG | AAAGAGAAAA |
| Conservation | *****      | *****      | *****      | *****      | *****      | *****      |
|              | .... ....  | .... ....  | .... ....  | .... ....  | .... ....  | .... ....  |
|              | 7685       | 7695       | 7705       | 7715       | 7725       | 7735       |
| 2d_SalI_Ge   | ACTTTTTGAA | ATAGAAAAGG | ATTATATATA | ATGAAATTAA | TTCCATTTTC | AATGAAATAA |
| 2dtr_Thai    | ACTTTTTGAA | ATAGAAAAGG | ATTATATATA | ATGAAATTAA | TTCCATTTTC | AATGAAATAA |
| Conservation | *****      | *****      | *****      | *****      | *****      | *****      |
|              | .... ....  | .... ....  | .... ....  | .... ....  | .... ....  | .... ....  |
|              | 7745       | 7755       | 7765       | 7775       | 7785       | 7795       |
| 2d_SalI_Ge   | GAACACTTAA | CGTTGACGAA | TTTGTGAAA  | AAATGTATAA | ACAAATTGAT | AGTGAAAAGG |
| 2dtr_Thai    | GAACACTTAA | CGTTGACGAA | TTTGTGAAA  | AAATGTATAA | ACAAATTGAT | AGTGAAAAGG |
| Conservation | *****      | *****      | *****      | *****      | *****      | *****      |

|              |            |            |            |            |             |            |
|--------------|------------|------------|------------|------------|-------------|------------|
|              | .... ....  | .... ....  | .... ....  | .... ....  | .... ....   | .... ....  |
|              | 7805       | 7815       | 7825       | 7835       | 7845        | 7855       |
| 2d_SalI_Ge   | AAAGCGTAAA | TAACATAACA | GATACTGATA | AGATAAGTGT | TGCAATTCAA  | AATGTTACAA |
| 2dtr_Thai    | AAAGCGTAAA | TAACATAACA | GATACTGATA | AGATAAGTGT | TGCAATTCAA  | AATGTTACAA |
| Conservation | *****      | *****      | *****      | *****      | *****       | *****      |
|              | .... ....  | .... ....  | .... ....  | .... ....  | .... ....   | .... ....  |
|              | 7865       | 7875       | 7885       | 7895       | 7905        | 7915       |
| 2d_SalI_Ge   | ATTACGATGC | AGAAATAAAA | GGCTTATTGT | CTAGAACTAT | TAACGTATTA  | GAAAGAATAA |
| 2dtr_Thai    | ATTACGATGC | AGAAATAAAA | GGCTTATTGT | CTAGAACTAT | TAACGTATTA  | GAAAGAATAA |
| Conservation | *****      | *****      | *****      | *****      | *****       | *****      |
|              | .... ....  | .... ....  | .... ....  | .... ....  | .... ....   | .... ....  |
|              | 7925       | 7935       | 7945       | 7955       | 7965        | 7975       |
| 2d_SalI_Ge   | GTAGAAGGAA | AGCGGAAATG | GATACTTTAT | TCAATAGTCT | ATCATCGAAT  | AATAAAAACC |
| 2dtr_Thai    | GTAGAAGGAA | AGCGGAAATG | GATACTTTAT | TCAATAGTCT | ATCATCGAAT  | AATAAAAACC |
| Conservation | *****      | *****      | *****      | *****      | *****       | *****      |
|              | .... ....  | .... ....  | .... ....  | .... ....  | .... ....   | .... ....  |
|              | 7985       | 7995       | 8005       | 8015       | 8025        | 8035       |
| 2d_SalI_Ge   | TAAATGAAAA | TGCAAAAAGA | TACATGAATG | ATTCAGCTGA | AATAATTAAT  | CAATTAAATA |
| 2dtr_Thai    | TAAATGAAAA | TGCAAAAAGA | TACATGAATG | ATTCAGCTGA | AATAATTAAT  | CAATTAAATA |
| Conservation | *****      | *****      | *****      | *****      | *****       | *****      |
|              | .... ....  | .... ....  | .... ....  | .... ....  | .... ....   | .... ....  |
|              | 8045       | 8055       | 8065       | 8075       | 8085        | 8095       |
| 2d_SalI_Ge   | GCCATGTTC  | AAAAATAACA | AAACTGAAAA | CATATGCAAA | TGAGGTAATT  | GAACAATTAC |
| 2dtr_Thai    | GCCATGTTC  | AAAAATAACA | AAACTGAAAA | CATATGCAAA | TGAGGTAATT  | GAACAATTAC |
| Conservation | *****      | *****      | *****      | *****      | *****       | *****      |
|              | .... ....  | .... ....  | .... ....  | .... ....  | .... ....   | .... ....  |
|              | 8105       | 8115       | 8125       | 8135       | 8145        | 8155       |
| 2d_SalI_Ge   | AAAAAGAACT | AACAAGATTA | TTAGATCAAC | GTAAAATTGA | AATTCCAGTT  | GATGATACTC |
| 2dtr_Thai    | AAAAAGAACT | AACAAGATTA | TTAGATCAAC | GTAAAATTGA | AATTCCAGTT  | GATGATACTC |
| Conservation | *****      | *****      | *****      | *****      | *****       | *****      |
|              | .... ....  | .... ....  | .... ....  | .... ....  | .... ....   | .... ....  |
|              | 8165       | 8175       | 8185       | 8195       | 8205        | 8215       |
| 2d_SalI_Ge   | AAACTTCTTT | AAGTACCGAG | GACGTAAAAG | AAGAACTGC  | TAATCAGAAG  | GAGCTAGAAA |
| 2dtr_Thai    | AAACTTCTTT | AAGTACCGAG | GACGTAAAAG | AAGAACTGC  | TAATCAGAAG  | GAGCTAGAAA |
| Conservation | *****      | *****      | *****      | *****      | *****       | *****      |
|              | .... ....  | .... ....  | .... ....  | .... ....  | .... ....   | .... ....  |
|              | 8225       | 8235       | 8245       | 8255       | 8265        | 8275       |
| 2d_SalI_Ge   | CTGATAAGCA | GAAGGAGCTA | GAAAAAGCCA | TAGAAAAGGA | ACAAGAAGAA  | GCTGTAGAAG |
| 2dtr_Thai    | CTGATAAGCA | GAAGGAGCTA | GAAAAAGCCA | TAGAAAAGGA | ACAAGAAGAA  | GCTGTAGAAG |
| Conservation | *****      | *****      | *****      | *****      | *****       | *****      |
|              | .... ....  | .... ....  | .... ....  | .... ....  | .... ....   | .... ....  |
|              | 8285       | 8295       | 8305       | 8315       | 8325        | 8335       |
| 2d_SalI_Ge   | GTGAACTACA | AAAAACTATA | GAAGTGAAAA | AAGAATCTGC | TATAAAAAGAG | GAACAAGAAA |
| 2dtr_Thai    | GTGAACTACA | AAAAACTATA | GAAGTGAAAA | AAGAATCTGC | TATAAAAAGAG | GAACAAGAAA |
| Conservation | *****      | *****      | *****      | *****      | *****       | *****      |
|              | .... ....  | .... ....  | .... ....  | .... ....  | .... ....   | .... ....  |
|              | 8345       | 8355       | 8365       | 8375       | 8385        | 8395       |
| 2d_SalI_Ge   | CTCCTGAGCA | GGAGGAACGA | GAAACATCTA | TAAATCAGGA | ACCAGAACAT  | GTTACTTATG |
| 2dtr_Thai    | CTCCTGAGCA | GGAGGAACGA | GAAACATCTA | TAAATCAGGA | ACCAGAACAT  | GTTACTTATG |
| Conservation | *****      | *****      | *****      | *****      | *****       | *****      |

```

      ....|....| ....|....| ....|....| ....|....| ....|....|
      8405      8415      8425      8435      8445      8455
2d_SalI_Ge AGACACTAGG ATATGATACA CCACATGCCC AAGAAAACGA GAGCGATGGT ACTCAACACG
2dtr_Thai  AGACACTAGG ATATGATACA CCACATGCCC AAGAAAACGA GAGCGATGGT ACTCAACACG
Conservation *****

```

```

      ....|....| ....|....| ....|....| ....|....| ....|....|
      8465      8475      8485      8495      8505      8515
2d_SalI_Ge ACGATTCAGA AAGAGATGAT AAATCAAAGG CAAAAGATGC AATGGGAAGA ACTCGTTTGG
2dtr_Thai  ACGATTCAGA AAGAGATGAT AAATCAAAGG CAAAAGATGC AATGGGAAGA ACTCGTTTGG
Conservation *****

```

```

      ....|....| ....|....| ....|....| ....|....| ....|....|
      8525      8535      8545      8555      8565      8575
2d_SalI_Ge CAGGAGCTAT TATTATCGGT TTATCTTTTT TTCCCGGAGT TCTTGATATTA GCATTTAGGG
2dtr_Thai  CAGGAGCTAT TATTATCGGT TTATCTTTTT TTCCCGGAGT TCTTGATATTA GCATTTAGGG
Conservation *****

```

```

      ....|....| ....|....| ....|....| ....|....| ....|....|
      8585      8595      8605      8615      8625      8635
2d_SalI_Ge ACACGCAAAC AGAAGAAGAG GAAAGCCATG AACATGATCA TCATCAAGCA TTTGGAGGTA
2dtr_Thai  ACACGCAAAC AGAAGAAGAG GAAAGCCATG AACATGATTA TCATCAAGCA TTTGGAGGTA
Conservation *****

```

```

      ....|....| ....|....| ....|....| ....|....| ....|....|
      8645      8655      8665      8675      8685      8695
2d_SalI_Ge CTGATGATTA TAATATGCAA GATAAAGAAG AAGTTATCGA AGTCTGTTTT AATGAGGATG
2dtr_Thai  CTGATGATTA TAATATGCAA GATAAAGAAG AAGTTATCGA AGTCTGTTTT AATGAGGATG
Conservation *****

```

```

      ....|
      8705
2d_SalI_Ge ATTAA
2dtr_Thai  ATTAA
Conservation *****

```

**Alignment: Pvrpb2e**

|              |             |             |             |             |             |             |
|--------------|-------------|-------------|-------------|-------------|-------------|-------------|
|              | ..... ..... | ..... ..... | ..... ..... | ..... ..... | ..... ..... | ..... ..... |
|              | 5           | 15          | 25          | 35          | 45          | 55          |
| 2e_Brazil    | -----       | -----       | -----       | -----       | -----       | -----       |
| 2e_Thai      | ATGGAAGA    | ACCTATTTT   | TGTGATCTT   | TGTAACCTCT  | TGTTTATTCT  | TTCCGCAGTA  |
| Conservation |             |             |             |             |             |             |
|              |             |             |             |             |             |             |
|              | ..... ..... | ..... ..... | ..... ..... | ..... ..... | ..... ..... | ..... ..... |
|              | 65          | 75          | 85          | 95          | 105         | 115         |
| 2e_Brazil    | -----       | -----       | -----       | -----       | -----       | -----       |
| 2e_Thai      | TGTAAAGACA  | ATAACAAAA   | CCAACCTAAC  | AGGCTCAAAA  | GGGATTTCAA  | GCTATCACCA  |
| Conservation |             |             |             |             |             |             |
|              |             |             |             |             |             |             |
|              | ..... ..... | ..... ..... | ..... ..... | ..... ..... | ..... ..... | ..... ..... |
|              | 125         | 135         | 145         | 155         | 165         | 175         |
| 2e_Brazil    | -----       | -----       | -----       | -----       | -----       | -----       |
| 2e_Thai      | ATACATGCCA  | CTTCCTTGGG  | AAGTGACCAG  | TTCGAACATG  | GCAGTGAAGC  | AAAGGGGAAC  |
| Conservation |             |             |             |             |             |             |
|              |             |             |             |             |             |             |
|              | ..... ..... | ..... ..... | ..... ..... | ..... ..... | ..... ..... | ..... ..... |
|              | 185         | 195         | 205         | 215         | 225         | 235         |
| 2e_Brazil    | -----       | -----       | -----       | -----       | -----       | -----       |
| 2e_Thai      | GAACAAAATA  | ATCGTAACAG  | TGACAATGAT  | TACAGTAATG  | AGCACCTTAA  | TGATGATAAC  |
| Conservation |             |             |             |             |             |             |
|              |             |             |             |             |             |             |
|              | ..... ..... | ..... ..... | ..... ..... | ..... ..... | ..... ..... | ..... ..... |
|              | 245         | 255         | 265         | 275         | 285         | 295         |
| 2e_Brazil    | -----       | -----       | -----       | -----       | -----       | -----       |
| 2e_Thai      | AAAATAAGAG  | GAGAAAACGT  | AAACACGACT  | CACTTACGAA  | ATAATTCATC  | CTTTATATCC  |
| Conservation |             |             |             |             |             |             |
|              |             |             |             |             |             |             |
|              | ..... ..... | ..... ..... | ..... ..... | ..... ..... | ..... ..... | ..... ..... |
|              | 305         | 315         | 325         | 335         | 345         | 355         |
| 2e_Brazil    | -----       | -----       | -----       | -----       | -----       | -----       |
| 2e_Thai      | TTAAAAAATT  | ATAAAATTGC  | AAGAAAACCA  | TCTCGCTATT  | CATACCTAGA  | TAAGGACAAC  |
| Conservation |             |             |             |             |             |             |
|              |             |             |             |             |             |             |
|              | ..... ..... | ..... ..... | ..... ..... | ..... ..... | ..... ..... | ..... ..... |
|              | 365         | 375         | 385         | 395         | 405         | 415         |
| 2e_Brazil    | -----       | -----       | -----       | -----       | -----       | -----       |
| 2e_Thai      | ACATATGCAG  | TTACTACCAA  | AAATAATGAT  | AAAAAAACT   | TACAGAAAGA  | GATTAATACT  |
| Conservation |             |             |             |             |             |             |
|              |             |             |             |             |             |             |
|              | ..... ..... | ..... ..... | ..... ..... | ..... ..... | ..... ..... | ..... ..... |
|              | 425         | 435         | 445         | 455         | 465         | 475         |
| 2e_Brazil    | -----       | -----       | -----       | -----       | -----       | -----       |
| 2e_Thai      | ATTCCAAGTA  | CATTCATACA  | AAAAACTCAT  | TATGAACCCC  | AGAGAGTGAG  | TGATTCATGC  |
| Conservation |             |             |             |             |             |             |
|              |             |             |             |             |             |             |
|              | ..... ..... | ..... ..... | ..... ..... | ..... ..... | ..... ..... | ..... ..... |
|              | 485         | 495         | 505         | 515         | 525         | 535         |
| 2e_Brazil    | -----       | -----       | -----       | -----       | -----       | -----       |
| 2e_Thai      | GATTAATCTG  | GATTATGTTT  | GTATCTACGG  | TGACCATAAA  | AGTATAATTT  | CTTTATTGTA  |
| Conservation |             |             |             |             |             |             |
|              |             |             |             |             |             |             |
|              | ..... ..... | ..... ..... | ..... ..... | ..... ..... | ..... ..... | ..... ..... |
|              | 545         | 555         | 565         | 575         | 585         | 595         |
| 2e_Brazil    | -----       | -----       | -----       | -----       | -----       | -----       |
| 2e_Thai      | TCCATATAAT  | CCTGAAATTT  | ATGCTTTTAG  | AGAACTGAGA  | AGTTATGCAC  | TACTTGACGA  |
| Conservation |             |             |             |             |             |             |

|              |             |             |             |             |             |             |
|--------------|-------------|-------------|-------------|-------------|-------------|-------------|
|              | ..... ..... | ..... ..... | ..... ..... | ..... ..... | ..... ..... | ..... ..... |
|              | 605         | 615         | 625         | 635         | 645         | 655         |
| 2e_Brazil    | -----       | -----       | -----       | -----       | -----       | -----       |
| 2e_Thai      | AGAAATGAAG  | AGAGCAATCG  | ACGAAACGTA  | TAATGTCGAA  | ATACCTCGCA  | TTGAAAACAT  |
| Conservation |             |             |             |             |             |             |
|              |             |             |             |             |             |             |
|              | ..... ..... | ..... ..... | ..... ..... | ..... ..... | ..... ..... | ..... ..... |
|              | 665         | 675         | 685         | 695         | 705         | 715         |
| 2e_Brazil    | -----       | -----       | -----       | -----       | -----       | -----       |
| 2e_Thai      | TGTGTCTCAA  | AGTTTGAATG  | AATGCTCAGA  | TCAAATAAGA  | CAATTGAATA  | CATTAATATA  |
| Conservation |             |             |             |             |             |             |
|              |             |             |             |             |             |             |
|              | ..... ..... | ..... ..... | ..... ..... | ..... ..... | ..... ..... | ..... ..... |
|              | 725         | 735         | 745         | 755         | 765         | 775         |
| 2e_Brazil    | -----       | -----       | -----       | -----       | -----       | -----       |
| 2e_Thai      | TCATCTAGAA  | AATCCAGAAG  | GACATGGAAT  | TCAAGAACGT  | GTATACGGTA  | CTAAGAAGCA  |
| Conservation |             |             |             |             |             |             |
|              |             |             |             |             |             |             |
|              | ..... ..... | ..... ..... | ..... ..... | ..... ..... | ..... ..... | ..... ..... |
|              | 785         | 795         | 805         | 815         | 825         | 835         |
| 2e_Brazil    | -----       | -----       | -----       | -----       | -----       | -----       |
| 2e_Thai      | AGAGTACAAA  | AACAGACTTC  | AATCTTTACA  | TCAATGCATA  | AAAGAAAAAT  | ATAAGAAAAA  |
| Conservation |             |             |             |             |             |             |
|              |             |             |             |             |             |             |
|              | ..... ..... | ..... ..... | ..... ..... | ..... ..... | ..... ..... | ..... ..... |
|              | 845         | 855         | 865         | 875         | 885         | 895         |
| 2e_Brazil    | -----       | -----       | -----       | -----       | -----       | -----       |
| 2e_Thai      | TGAGAAAGAA  | ATTTTACTAA  | GACAAATATC  | TACGAAACTA  | TAAAGGATAT  | ATCGTGCAAC  |
| Conservation |             |             |             |             |             |             |
|              |             |             |             |             |             |             |
|              | ..... ..... | ..... ..... | ..... ..... | ..... ..... | ..... ..... | ..... ..... |
|              | 905         | 915         | 925         | 935         | 945         | 955         |
| 2e_Brazil    | -----       | -----       | -----       | -----       | -----       | -----       |
| 2e_Thai      | TGGATACACT  | TGTGTTC AAC | AGATATATAT  | TATAATATGA  | TTAAGATACG  | TGAGATAAAT  |
| Conservation |             |             |             |             |             |             |
|              |             |             |             |             |             |             |
|              | ..... ..... | ..... ..... | ..... ..... | ..... ..... | ..... ..... | ..... ..... |
|              | 965         | 975         | 985         | 995         | 1005        | 1015        |
| 2e_Brazil    | -----       | -----       | -----       | -----       | -----       | -----       |
| 2e_Thai      | GTAAAGAAT   | ATGACGTTAG  | ATCAATTACT  | TCATACTTTA  | ATGCAACTAA  | GAAAATACAT  |
| Conservation |             |             |             |             |             |             |
|              |             |             |             |             |             |             |
|              | ..... ..... | ..... ..... | ..... ..... | ..... ..... | ..... ..... | ..... ..... |
|              | 1025        | 1035        | 1045        | 1055        | 1065        | 1075        |
| 2e_Brazil    | -----       | -----       | -----       | -----       | -----       | -----       |
| 2e_Thai      | AGGTCTGGTG  | AAGATACAAT  | AAAGAGAGTA  | AAAAAACAGT  | TAAATAATAG  | TCTTGCCTAT  |
| Conservation |             |             |             |             |             |             |
|              |             |             |             |             |             |             |
|              | ..... ..... | ..... ..... | ..... ..... | ..... ..... | ..... ..... | ..... ..... |
|              | 1085        | 1095        | 1105        | 1115        | 1125        | 1135        |
| 2e_Brazil    | -----       | -----       | -----       | -----       | -----AT     | GAGTCAACAC  |
| 2e_Thai      | GAAACAGTAG  | AATTTATATT  | AGAAGAAATT  | AAATATATTA  | CAGAAAAAAT  | GAGTCAACAC  |
| Conservation |             |             |             |             | **          | *****       |
|              |             |             |             |             |             |             |
|              | ..... ..... | ..... ..... | ..... ..... | ..... ..... | ..... ..... | ..... ..... |
|              | 1145        | 1155        | 1165        | 1175        | 1185        | 1195        |
| 2e_Brazil    | -----       | -----       | -----       | -----       | -----       | -----       |
| 2e_Thai      | TTAGAAAAAG  | TTAAGCAAGA  | AACTGAAACT  | ATAAATAAGC  | TTTCTAAACA  | AGAAGTCTGG  |
| Conservation | *****       | *****       | *****       | *****       | *****       | *****       |

|              |            |            |            |            |            |            |
|--------------|------------|------------|------------|------------|------------|------------|
|              | .... ....  | .... ....  | .... ....  | .... ....  | .... ....  | .... ....  |
|              | 1205       | 1215       | 1225       | 1235       | 1245       | 1255       |
| 2e_Brazil    | TCCCACCTCT | TTGCATTAA  | TCTTCAAAGG | GAATTATTCT | TTTTAGCCTA | CAGCTATTCC |
| 2e_Thai      | TCCCACCTCT | TTGCATTAA  | TCTTCAAAGG | GAATTATTCT | TTTTAGCCTA | CAGCTATTCC |
| Conservation | *****      | *****      | *****      | *****      | *****      | *****      |
|              | .... ....  | .... ....  | .... ....  | .... ....  | .... ....  | .... ....  |
|              | 1265       | 1275       | 1285       | 1295       | 1305       | 1315       |
| 2e_Brazil    | AGTTTTAAAT | TTAGTACTGA | CAATTTAAGA | GTCTTGAAAA | ATGTGTCCGA | GAGCAAAACA |
| 2e_Thai      | AGTTTTAAAT | TTAGTACTGA | CAATTTAAGA | GTCTTGAAAA | ATGTGTCCGA | GAGCAAAACA |
| Conservation | *****      | *****      | *****      | *****      | *****      | *****      |
|              | .... ....  | .... ....  | .... ....  | .... ....  | .... ....  | .... ....  |
|              | 1325       | 1335       | 1345       | 1355       | 1365       | 1375       |
| 2e_Brazil    | GGAAAACTTT | ATCAATATTT | TGCAAAATTC | GAGGGCAGTC | TCAACCACAT | AATAAATACT |
| 2e_Thai      | GGAAAACTTT | ATCAATATTT | TGCAAAATTC | GAGGGCAGTC | TCAACCACAT | AATAAATACT |
| Conservation | *****      | *****      | *****      | *****      | *****      | *****      |
|              | .... ....  | .... ....  | .... ....  | .... ....  | .... ....  | .... ....  |
|              | 1385       | 1395       | 1405       | 1415       | 1425       | 1435       |
| 2e_Brazil    | CTTATGTCCT | CTAAATATTC | CACGTCAAGT | ATTAATTCTG | TTCTCTCGGA | TTCTGAGGAA |
| 2e_Thai      | CTTATGTCCT | CTAAATATTC | CACGTCAAGT | ATTAATTCTG | TTCTCTCGGA | TTCTGAGGAA |
| Conservation | *****      | *****      | *****      | *****      | *****      | *****      |
|              | .... ....  | .... ....  | .... ....  | .... ....  | .... ....  | .... ....  |
|              | 1445       | 1455       | 1465       | 1475       | 1485       | 1495       |
| 2e_Brazil    | ATTTTAAAT  | CTGTAGAAAC | ATTACGCAGT | TCTACGTCCG | AGCAGATAAA | AGAACATGTA |
| 2e_Thai      | ATTTTAAAT  | CTGTAGAAAC | ATTACGCAGT | TCTACGTCCG | AGCAGATAAA | AGAACATGTA |
| Conservation | *****      | *****      | *****      | *****      | *****      | *****      |
|              | .... ....  | .... ....  | .... ....  | .... ....  | .... ....  | .... ....  |
|              | 1505       | 1515       | 1525       | 1535       | 1545       | 1555       |
| 2e_Brazil    | CTTTATTCGA | ATGCCCAAAT | AGAAGAGGCT | AAGAAAATTT | TAGATGAAAA | AATGCTTAAA |
| 2e_Thai      | CTTTATTCGA | ATGCCCAAAT | AGAAGAGGCT | AAGAAAATTT | TAGATGAAAA | AATGCTTAAA |
| Conservation | *****      | *****      | *****      | *****      | *****      | *****      |
|              | .... ....  | .... ....  | .... ....  | .... ....  | .... ....  | .... ....  |
|              | 1565       | 1575       | 1585       | 1595       | 1605       | 1615       |
| 2e_Brazil    | TTAGAAGAAT | ATGCACAAGA | AACAAAAGGG | GTAATTAAAA | CAGTAAATGA | AACATTTAAA |
| 2e_Thai      | TTAGAAGAAT | ATGCACAAGA | AACAAAAGGG | GTAATTAAAA | CAGTAAATGA | AACATTTAAA |
| Conservation | *****      | *****      | *****      | *****      | *****      | *****      |
|              | .... ....  | .... ....  | .... ....  | .... ....  | .... ....  | .... ....  |
|              | 1625       | 1635       | 1645       | 1655       | 1665       | 1675       |
| 2e_Brazil    | TTAAATATAA | TAGCAAGTGA | AGAAATAGAA | AAGAAAAGAC | GCGAAACTAA | CAAAAACAAA |
| 2e_Thai      | TTAAATATAA | TAGCAAGTGA | AGAAATAGAA | AAGAAAAGAC | GCGAAACTAA | CAAAAACAAA |
| Conservation | *****      | *****      | *****      | *****      | *****      | *****      |
|              | .... ....  | .... ....  | .... ....  | .... ....  | .... ....  | .... ....  |
|              | 1685       | 1695       | 1705       | 1715       | 1725       | 1735       |
| 2e_Brazil    | ACTTCTCTAG | AAAAATGTAA | GATATTCGTA | GAAGTTATAG | ACTTAATAAA | ATCAAATAAA |
| 2e_Thai      | ACTTCTCTAG | AAAAATGTAA | GATATTCGTA | GAAGTTATAG | ACTTAATAAA | ATCAAATAAA |
| Conservation | *****      | *****      | *****      | *****      | *****      | *****      |
|              | .... ....  | .... ....  | .... ....  | .... ....  | .... ....  | .... ....  |
|              | 1745       | 1755       | 1765       | 1775       | 1785       | 1795       |
| 2e_Brazil    | TATAAGGCAA | CCCAAAATAA | TAAAAAATA  | GAGGAACTTT | CAAAACAGAT | TATCACTATA |
| 2e_Thai      | TATAAGGCAA | CCCAAAATAA | TAAAAAATA  | GAGGAACTTT | CAAAACAGAT | TATCACTATA |
| Conservation | *****      | *****      | *****      | *****      | *****      | *****      |

|              |            |            |            |             |            |            |
|--------------|------------|------------|------------|-------------|------------|------------|
|              | .... ....  | .... ....  | .... ....  | .... ....   | .... ....  | .... ....  |
|              | 1805       | 1815       | 1825       | 1835        | 1845       | 1855       |
| 2e_Brazil    | AAAAGCAATT | TTCAACAATC | AGAGACAGCT | ATTAACGAAG  | ATGTGCAAAA | AATTAAGAA  |
| 2e_Thai      | AAAAGCAATT | TTCAACAATC | AGAGACAGCT | ATTAACGAAG  | ATGTGCAAAA | AATTAAGAA  |
| Conservation | *****      | *****      | *****      | *****       | *****      | *****      |
|              | .... ....  | .... ....  | .... ....  | .... ....   | .... ....  | .... ....  |
|              | 1865       | 1875       | 1885       | 1895        | 1905       | 1915       |
| 2e_Brazil    | TTAATTGAAA | ATGAAAAAAA | ACGTCGTTCC | ATGAAAAGATG | AAATAAAAAA | ACATTTGAAA |
| 2e_Thai      | TTAATTGAAA | ATGAAAAAAA | ACGTCGTTCC | ATGAAAAGATG | AAATAAAAAA | ACATTTGAAA |
| Conservation | *****      | *****      | *****      | *****       | *****      | *****      |
|              | .... ....  | .... ....  | .... ....  | .... ....   | .... ....  | .... ....  |
|              | 1925       | 1935       | 1945       | 1955        | 1965       | 1975       |
| 2e_Brazil    | TATTTTCCTG | AGACGGTGGA | TAACATAAAA | AAAATCATTT  | CCCAAAGGGA | AGAAATAGAA |
| 2e_Thai      | TATTTTCCTG | AGACGGTGGA | TAACATAAAA | AAAATCATTT  | CCCAAAGGGA | AGAAATAGAA |
| Conservation | *****      | *****      | *****      | *****       | *****      | *****      |
|              | .... ....  | .... ....  | .... ....  | .... ....   | .... ....  | .... ....  |
|              | 1985       | 1995       | 2005       | 2015        | 2025       | 2035       |
| 2e_Brazil    | AAATATATTC | TAAGCATTGA | AAATTTGATT | AAAGACGCGC  | CCTCTGCTGT | GGACGAATTT |
| 2e_Thai      | AAATATATTC | TAAGCATTGA | AAATTTGATT | AAAGACGCGC  | CCTCTGCTGT | GGACGAATTT |
| Conservation | *****      | *****      | *****      | *****       | *****      | *****      |
|              | .... ....  | .... ....  | .... ....  | .... ....   | .... ....  | .... ....  |
|              | 2045       | 2055       | 2065       | 2075        | 2085       | 2095       |
| 2e_Brazil    | ACAACGAAA  | AAACGGAATT | GCAAGACAAA | GCAAAATCAA  | TCGTTGATTC | ATTTTATAAG |
| 2e_Thai      | ACAACGAAA  | AAACGGAATT | GCAAGACAAA | GCAAAATCAA  | TCGTTGATTC | ATTTTATAAG |
| Conservation | *****      | *****      | *****      | *****       | *****      | *****      |
|              | .... ....  | .... ....  | .... ....  | .... ....   | .... ....  | .... ....  |
|              | 2105       | 2115       | 2125       | 2135        | 2145       | 2155       |
| 2e_Brazil    | GAAAATTTAC | AAACATTTGT | AGACGATTTA | GCAGAATTTT  | ATACAAAACA | TCAAGCCTTA |
| 2e_Thai      | GAAAATTTAC | AAACATTTGT | AGACGATTTA | GCAGAATTTT  | ATACAAAACA | TCAAGCCTTA |
| Conservation | *****      | *****      | *****      | *****       | *****      | *****      |
|              | .... ....  | .... ....  | .... ....  | .... ....   | .... ....  | .... ....  |
|              | 2165       | 2175       | 2185       | 2195        | 2205       | 2215       |
| 2e_Brazil    | GACAAGGAAG | AAAATACTAA | AGAAGAAACT | GAAGCATTGT  | ACGAAAAAAC | GAAAGAAAAA |
| 2e_Thai      | GACAAGGAAG | AAAATACTAA | AGAAGAAACT | GAAGCATTGT  | ACGAAAAAAC | GAAAGAAAAA |
| Conservation | *****      | *****      | *****      | *****       | *****      | *****      |
|              | .... ....  | .... ....  | .... ....  | .... ....   | .... ....  | .... ....  |
|              | 2225       | 2235       | 2245       | 2255        | 2265       | 2275       |
| 2e_Brazil    | TATCAACAGC | TTGTAGATAT | GAAGTGCGAT | GGTATACCAG  | AAATGTTAAA | CAATTTGAGT |
| 2e_Thai      | TATCAACAGC | TTGTAGATAT | GAAGTGCGAT | GGTATACCAG  | AAATGTTAAA | CAATTTGAGT |
| Conservation | *****      | *****      | *****      | *****       | *****      | *****      |
|              | .... ....  | .... ....  | .... ....  | .... ....   | .... ....  | .... ....  |
|              | 2285       | 2295       | 2305       | 2315        | 2325       | 2335       |
| 2e_Brazil    | GAAGTGTTAA | ATAGTCTCAC | ACAGCTAAAG | AACAAAATTA  | TAGAGGGGAA | TATTCAAAAT |
| 2e_Thai      | GAAGTGTTAA | ATAGTCTCAC | ACAGCTAAAG | AACAAAATTA  | TAGAGGGGAA | TATTCAAAAT |
| Conservation | *****      | *****      | *****      | *****       | *****      | *****      |
|              | .... ....  | .... ....  | .... ....  | .... ....   | .... ....  | .... ....  |
|              | 2345       | 2355       | 2365       | 2375        | 2385       | 2395       |
| 2e_Brazil    | ATCAAAAAAG | ATGTGTCAAG | TTCGTTAAAG | AATCTAACTG  | AAGAAACAGA | CCGATTAATA |
| 2e_Thai      | ATCAAAAAAG | ATGTGTCAAG | TTCGTTAAAG | AATCTAACTG  | AAGAAACAGA | CCGATTAATA |
| Conservation | *****      | *****      | *****      | *****       | *****      | *****      |

|              |            |            |            |            |            |            |
|--------------|------------|------------|------------|------------|------------|------------|
|              | .... ....  | .... ....  | .... ....  | .... ....  | .... ....  | .... ....  |
|              | 2405       | 2415       | 2425       | 2435       | 2445       | 2455       |
| 2e_Brazil    | AATAGCCTGA | AGGACTACGA | GCAAAGTGCA | GATAAACTGA | AAACCTACAT | AAATAGCATA |
| 2e_Thai      | AATAGCCTGA | AGGACTACGA | GCAAAGTGCA | GATAAACTGA | AAACCTACAT | AAATAGCATA |
| Conservation | *****      | *****      | *****      | *****      | *****      | *****      |
|              | .... ....  | .... ....  | .... ....  | .... ....  | .... ....  | .... ....  |
|              | 2465       | 2475       | 2485       | 2495       | 2505       | 2515       |
| 2e_Brazil    | AACGGGATAA | AAGACAAAGT | TCGAACTACT | TTAATCGAAA | AAGATGAAGA | CATTCCAGAA |
| 2e_Thai      | AACGGGATAA | AAGACAAAGT | TCGAACTACT | TTAATCGAAA | AAGATGAAGA | CATTCCAGAA |
| Conservation | *****      | *****      | *****      | *****      | *****      | *****      |
|              | .... ....  | .... ....  | .... ....  | .... ....  | .... ....  | .... ....  |
|              | 2525       | 2535       | 2545       | 2555       | 2565       | 2575       |
| 2e_Brazil    | TTAAAACTA  | CCTATGAAGA | ATATACAAAG | CAAAAGGGCG | AAG-----   | -----      |
| 2e_Thai      | TTAAAACTA  | CCTATGAAGA | ATATACAAAG | CAAAAGGGCG | AAGGTACTAA | TAAGGAAAGC |
| Conservation | *****      | *****      | *****      | *****      | ***        |            |
|              | .... ....  | .... ....  | .... ....  | .... ....  | .... ....  | .... ....  |
|              | 2585       | 2595       | 2605       | 2615       | 2625       | 2635       |
| 2e_Brazil    | -----      | -----      | -----      | -----      | -----      | -----      |
| 2e_Thai      | ACAGTAACAC | ACGATATTGA | CGTACTCAAA | GAAAATATAA | GAAAGGCTAA | CGAACAAATT |
| Conservation |            |            |            |            |            |            |
|              | .... ....  | .... ....  | .... ....  | .... ....  | .... ....  | .... ....  |
|              | 2645       | 2655       | 2665       | 2675       | 2685       | 2695       |
| 2e_Brazil    | -----      | -----      | -----      | -----      | -----      | -----      |
| 2e_Thai      | TAAACTTACA | AAAACGTAAT | GCAAAGATTA | GAAACACAGA | ATAGTGAGAC | ATATCAGGAA |
| Conservation |            |            |            |            |            |            |
|              | .... ....  | .... ....  | .... ....  | .... ....  | .... ....  | .... ....  |
|              | 2705       | 2715       | 2725       | 2735       | 2745       | 2755       |
| 2e_Brazil    | -----      | -----AAGG  | TTTTAACACT | AAAATCGAAA | GTTTAGAATT | TGAAAACTT  |
| 2e_Thai      | ACTAAACTT  | TGTTAGAAGG | TTTTAACACT | AAAATCGAAA | GTTTAGAATT | TGAAAACTT  |
| Conservation |            | ****       | *****      | *****      | *****      | *****      |
|              | .... ....  | .... ....  | .... ....  | .... ....  | .... ....  | .... ....  |
|              | 2765       | 2775       | 2785       | 2795       | 2805       | 2815       |
| 2e_Brazil    | CAAGATGAAT | TAAGGAGTCA | CAAAGAATCC | GCTAGTAGTA | CCATAAACCA | AATAGAAAAT |
| 2e_Thai      | CAAGATGAAT | TAAGGAGTCA | CAAAGAATCC | GCTAGTAGTA | CCATAAACCA | AATAGAAAAT |
| Conservation | *****      | *****      | *****      | *****      | *****      | *****      |
|              | .... ....  | .... ....  | .... ....  | .... ....  | .... ....  | .... ....  |
|              | 2825       | 2835       | 2845       | 2855       | 2865       | 2875       |
| 2e_Brazil    | ACAAAAAAG  | TTATAGACAC | GCTGAAGTCT | TTAAATACTC | TCACAAAGAA | CTCCAACACA |
| 2e_Thai      | ACAAAAAAG  | TTATAGACAC | GCTGAAGTCT | TTAAATACTC | TCACAAAGAA | CTCCAACACA |
| Conservation | *****      | *****      | *****      | *****      | *****      | *****      |
|              | .... ....  | .... ....  | .... ....  | .... ....  | .... ....  | .... ....  |
|              | 2885       | 2895       | 2905       | 2915       | 2925       | 2935       |
| 2e_Brazil    | AACGAACAAT | CGATCGCAAA | AATAAAAGAG | AGAAAGAATG | ATTTAGTAAA | AAAAATAGAT |
| 2e_Thai      | AACGAACAAT | CGATCGCAAA | AATAAAAGAG | AGAAAGAATG | ATTTAGTAAA | AAAAATAGAT |
| Conservation | *****      | *****      | *****      | *****      | *****      | *****      |
|              | .... ....  | .... ....  | .... ....  | .... ....  | .... ....  | .... ....  |
|              | 2945       | 2955       | 2965       | 2975       | 2985       | 2995       |
| 2e_Brazil    | AAACATATTG | AAGCATTAAA | TAGTTACAAC | ATAGTAGAAG | ATAAAGAAAG | AACATCCCTT |
| 2e_Thai      | AAACATATTG | AAGCATTAAA | TAGTTACAAC | ATAGTAGAAG | ATAAAGAAAG | AACATCCCTT |
| Conservation | *****      | *****      | *****      | *****      | *****      | *****      |



|              |            |            |             |             |            |            |
|--------------|------------|------------|-------------|-------------|------------|------------|
|              | .... ....  | .... ....  | .... ....   | .... ....   | .... ....  | .... ....  |
|              | 3005       | 3015       | 3025        | 3035        | 3045       | 3055       |
| 2e_Brazil    | TTGAACACTT | TAAATGAAGA | AAAAATAAT   | GTAGAAAGTG  | AAATACCTGA | AACATCAATA |
| 2e_Thai      | TTGAACACTT | TAAATGAAGA | AAAAATAAT   | GTAGAAAGTG  | AAATACCTGA | AACATCAATA |
| Conservation | *****      | *****      | *****       | *****       | *****      | *****      |
|              | .... ....  | .... ....  | .... ....   | .... ....   | .... ....  | .... ....  |
|              | 3065       | 3075       | 3085        | 3095        | 3105       | 3115       |
| 2e_Brazil    | TCTAAATTGC | AAGTAGATGT | AAAAGCTTCA  | CAAGATTACT  | GTAAAAATGA | AAAGATCAAT |
| 2e_Thai      | TCTAAATTGC | AAGTAGATGT | AAAAGCTTCA  | CAAGATTACT  | GTAAAAATGA | AAAGATCAAT |
| Conservation | *****      | *****      | *****       | *****       | *****      | *****      |
|              | .... ....  | .... ....  | .... ....   | .... ....   | .... ....  | .... ....  |
|              | 3125       | 3135       | 3145        | 3155        | 3165       | 3175       |
| 2e_Brazil    | ATCGACAAAG | GCATGGAAAC | CAATTCGGAA  | GAAC TGGGAA | AATATAAAAC | TGAGTGCCAT |
| 2e_Thai      | ATCGACAAAG | GCATGGAAAC | CAATTCGGAA  | GAAC TGGGAA | AATATAAAAC | TGAGTGCCAT |
| Conservation | *****      | *****      | *****       | *****       | *****      | *****      |
|              | .... ....  | .... ....  | .... ....   | .... ....   | .... ....  | .... ....  |
|              | 3185       | 3195       | 3205        | 3215        | 3225       | 3235       |
| 2e_Brazil    | AACACAGAAC | TGGAAATAAA | CAAATTA AAC | GCCAATTGTC  | AAGCATTAGA | AAAAAAATA  |
| 2e_Thai      | AACACAGAAC | TGGAAATAAA | CAAATTA AAC | GCCAATTGTC  | AAGCATTAGA | AAAAAAATA  |
| Conservation | *****      | *****      | *****       | *****       | *****      | *****      |
|              | .... ....  | .... ....  | .... ....   | .... ....   | .... ....  | .... ....  |
|              | 3245       | 3255       | 3265        | 3275        | 3285       | 3295       |
| 2e_Brazil    | GAAGAGTTGG | TACAAGATCA | ACATGGCCAA  | ATTATAATAT  | TTGTTGATAA | ACTTATAACA |
| 2e_Thai      | GAAGAGTTGG | TACAAGATCA | ACATGGCCAA  | ATTATAATAT  | TTGTTGATAA | ACTTATAACA |
| Conservation | *****      | *****      | *****       | *****       | *****      | *****      |
|              | .... ....  | .... ....  | .... ....   | .... ....   | .... ....  | .... ....  |
|              | 3305       | 3315       | 3325        | 3335        | 3345       | 3355       |
| 2e_Brazil    | ACGAGGGACA | CGCAGATAAA | TGGAAAAATC  | GAGCTGAACC  | TAAATTCTCT | AAAGGATATG |
| 2e_Thai      | ACGAGGGACA | CGCAGATAAA | TGGAAAAATC  | GAGCTGAACC  | TAAATTCTCT | AAAGGATATG |
| Conservation | *****      | *****      | *****       | *****       | *****      | *****      |
|              | .... ....  | .... ....  | .... ....   | .... ....   | .... ....  | .... ....  |
|              | 3365       | 3375       | 3385        | 3395        | 3405       | 3415       |
| 2e_Brazil    | AAAACAAAAT | TAGACGCTTT | TAATTTTGAA  | GAAGCTGTTA  | ACAATAACGG | AAACGTTACT |
| 2e_Thai      | AAAACAAAAT | TAGACGCTTT | TAATTTTGAA  | GAAGCTGTTA  | ACAATAACGG | AAACGTTACT |
| Conservation | *****      | *****      | *****       | *****       | *****      | *****      |
|              | .... ....  | .... ....  | .... ....   | .... ....   | .... ....  | .... ....  |
|              | 3425       | 3435       | 3445        | 3455        | 3465       | 3475       |
| 2e_Brazil    | GTTCAAAGCA | AAATAAGTGC | TTTTAAAGAA  | AAAGTGAAAA  | GTACATTGCA | AAATATAGAA |
| 2e_Thai      | GTTCAAAGCA | AAATAAGTGC | TTTTAAAGAA  | AAAGTGAAAA  | GTACATTGCA | AAATATAGAA |
| Conservation | *****      | *****      | *****       | *****       | *****      | *****      |
|              | .... ....  | .... ....  | .... ....   | .... ....   | .... ....  | .... ....  |
|              | 3485       | 3495       | 3505        | 3515        | 3525       | 3535       |
| 2e_Brazil    | AATGAAATCG | GCAAATTTAA | CGGAATTTAA  | CAGA ACTACG | ATGCATATAT | GGAAACATTC |
| 2e_Thai      | AATGAAATCG | GCAAATTTAA | CGGAATTTAA  | CAGA ACTACG | ATGCATATAT | GGAAACATTC |
| Conservation | *****      | *****      | *****       | *****       | *****      | *****      |
|              | .... ....  | .... ....  | .... ....   | .... ....   | .... ....  | .... ....  |
|              | 3545       | 3555       | 3565        | 3575        | 3585       | 3595       |
| 2e_Brazil    | AACAAAGGAA | AAGATCAGAT | CACCGAATTC  | AAAGATAAAA  | AAGAGAACAT | GGAAAAAATT |
| 2e_Thai      | AACAAAGGAA | AAGATCAGAT | CACCGAATTC  | AAAGATAAAA  | AAGAGAACAT | GGAAAAAATT |
| Conservation | *****      | *****      | *****       | *****       | *****      | *****      |

|              |             |             |            |             |            |             |
|--------------|-------------|-------------|------------|-------------|------------|-------------|
|              | .... ....   | .... ....   | .... ....  | .... ....   | .... ....  | .... ....   |
|              | 3605        | 3615        | 3625       | 3635        | 3645       | 3655        |
| 2e_Brazil    | TATAAACAAA  | TGAAAGAAAC  | CACACTCAAC | AAATTAGAAG  | AGGCAGAAAA | AGAAAGTAGT  |
| 2e_Thai      | TATAAACAAA  | TGAAAGAAAC  | CACACTCAAC | AAATTAGAAG  | AGGCAGAAAA | AGAAAGTAGT  |
| Conservation | *****       | *****       | *****      | *****       | *****      | *****       |
|              | .... ....   | .... ....   | .... ....  | .... ....   | .... ....  | .... ....   |
|              | 3665        | 3675        | 3685       | 3695        | 3705       | 3715        |
| 2e_Brazil    | ATATTAACC   | AAGTAAAACA  | AATCGAATTG | GAATACAGAA  | GAATTTTAAT | TCATCATGCT  |
| 2e_Thai      | ATATTAACC   | AAGTAAAACA  | AATCGAATTG | GAATACAGAA  | GAATTTTAAT | TCATCATGCT  |
| Conservation | *****       | *****       | *****      | *****       | *****      | *****       |
|              | .... ....   | .... ....   | .... ....  | .... ....   | .... ....  | .... ....   |
|              | 3725        | 3735        | 3745       | 3755        | 3765       | 3775        |
| 2e_Brazil    | G TTCACATGA | T CGATCAGGA | AAACACAAAA | GCTAAATCGG  | TTATGGCGGA | TATCGAAACA  |
| 2e_Thai      | G TTCACATGA | T CGATCAGGA | AAACACAAAA | GCTAAATCGG  | TTATGGCGGA | TATCGAAACA  |
| Conservation | *****       | *****       | *****      | *****       | *****      | *****       |
|              | .... ....   | .... ....   | .... ....  | .... ....   | .... ....  | .... ....   |
|              | 3785        | 3795        | 3805       | 3815        | 3825       | 3835        |
| 2e_Brazil    | TCTAAAAGCA  | AAATTGATGA  | AATAAACTT  | CAAACCTGAAG | AATACAAACA | GAAGAATATG  |
| 2e_Thai      | TCTAAAAGCA  | AAATTGATGA  | AATAAACTT  | CAAACCTGAAG | AATACAAACA | GAAGAATATG  |
| Conservation | *****       | *****       | *****      | *****       | *****      | *****       |
|              | .... ....   | .... ....   | .... ....  | .... ....   | .... ....  | .... ....   |
|              | 3845        | 3855        | 3865       | 3875        | 3885       | 3895        |
| 2e_Brazil    | ACTAATTTTG  | AATATGAAAA  | TCATTACAGC | AAGGCTAAAC  | AGAGCAACAC | CAAATAAAT   |
| 2e_Thai      | ACTAATTTTG  | AATATGAAAA  | TCATTACAGC | AAGGCTAAAC  | AGAGCAACAC | CAAATAAAT   |
| Conservation | *****       | *****       | *****      | *****       | *****      | *****       |
|              | .... ....   | .... ....   | .... ....  | .... ....   | .... ....  | .... ....   |
|              | 3905        | 3915        | 3925       | 3935        | 3945       | 3955        |
| 2e_Brazil    | GAATTTTCTA  | TAGACGCCAC  | AAGCGATAAG | GAAAAGGCTG  | ACAAAAGCGA | AGATGTA AAC |
| 2e_Thai      | GAATTTTCTA  | TAGACGCCAC  | AAGCGATAAG | GAAAAGGCTG  | ACAAAAGCGA | AGATGTA AAC |
| Conservation | *****       | *****       | *****      | *****       | *****      | *****       |
|              | .... ....   | .... ....   | .... ....  | .... ....   | .... ....  | .... ....   |
|              | 3965        | 3975        | 3985       | 3995        | 4005       | 4015        |
| 2e_Brazil    | GAAATAGAAC  | GTATCAAAGA  | AAAAATTAAT | GACAATCTGC  | AAAAAGTCAA | AGAAGAATAT  |
| 2e_Thai      | GAAATAGAAC  | GTATCAAAGA  | AAAAATTAAT | GACAATCTGC  | AAAAAGTCAA | AGAAGAATAT  |
| Conservation | *****       | *****       | *****      | *****       | *****      | *****       |
|              | .... ....   | .... ....   | .... ....  | .... ....   | .... ....  | .... ....   |
|              | 4025        | 4035        | 4045       | 4055        | 4065       | 4075        |
| 2e_Brazil    | ACTTCTATGG  | AGGAAATAAA  | AAAACAAATG | AATAGTATGA  | AAGATTTACT | AGCTTTGAAC  |
| 2e_Thai      | ACTTCTATGG  | AGGAAATAAA  | AAAACAAATG | AATAGTATGA  | AAGATTTACT | AGCTTTGAAC  |
| Conservation | *****       | *****       | *****      | *****       | *****      | *****       |
|              | .... ....   | .... ....   | .... ....  | .... ....   | .... ....  | .... ....   |
|              | 4085        | 4095        | 4105       | 4115        | 4125       | 4135        |
| 2e_Brazil    | AATTCTGAAA  | CGACTGCTAC  | AAACATATTA | GATAACACAA  | AAAACGCATT | AGTTTTAGC   |
| 2e_Thai      | AATTCTGAAA  | CGACTGCTAC  | AAACATATTA | GATAACACAA  | AAAACGCATT | AGTTTTAGC   |
| Conservation | *****       | *****       | *****      | *****       | *****      | *****       |
|              | .... ....   | .... ....   | .... ....  | .... ....   | .... ....  | .... ....   |
|              | 4145        | 4155        | 4165       | 4175        | 4185       | 4195        |
| 2e_Brazil    | GAGGAGGCGG  | CAAAGGA ACT | TGAGAAATCA | AAACAATTAT  | TAGAAGAAGC | GGTAGCTCAG  |
| 2e_Thai      | GAGGAGGCGG  | CAAAGGA ACT | TGAGAAATCA | AAACAATTAT  | TAGAAGAAGC | GGTAGCTCAG  |
| Conservation | *****       | *****       | *****      | *****       | *****      | *****       |
|              | .... ....   | .... ....   | .... ....  | .... ....   | .... ....  | .... ....   |
|              | 4205        | 4215        | 4225       | 4235        | 4245       | 4255        |
| 2e_Brazil    | ATAGCTAAGG  | CAGGGGAACA  | TAAAGGTAAA | ATTGAGATAG  | CCTTAGAAGA | TGAACAATA   |

|              |            |            |            |            |            |            |
|--------------|------------|------------|------------|------------|------------|------------|
| 2e_Thai      | ATAGCTAAGG | CAGGGGAACA | TAAAGGTAAA | ATTGAGATAG | CCTTAGAAGA | TGAACAAATA |
| Conservation | *****      | *****      | *****      | *****      | *****      | *****      |
|              | .... ....  | .... ....  | .... ....  | .... ....  | .... ....  | .... ....  |
|              | 4265       | 4275       | 4285       | 4295       | 4305       | 4315       |
| 2e_Brazil    | AATGCCACG  | TAAACCAGAT | TGAACTAATA | AAGAATGAAA | TTGTGAATAA | AAAAAAGAA  |
| 2e_Thai      | AATGCCACG  | TAAACCAGAT | TGAACTAATA | AAGAATGAAA | TTGTGAATAA | AAAAAAGAA  |
| Conservation | *****      | *****      | *****      | *****      | *****      | *****      |
|              | .... ....  | .... ....  | .... ....  | .... ....  | .... ....  | .... ....  |
|              | 4325       | 4335       | 4345       | 4355       | 4365       | 4375       |
| 2e_Brazil    | ATGGAGTCCT | ATTTAAGCAA | GATAAAAGAA | TATAAAGAGA | AATGCACCAC | CCAAGTCAAC |
| 2e_Thai      | ATGGAGTCCT | ATTTAAGCAA | GATAAAAGAA | TATAAAGAGA | AATGCACCAC | CCAAGTCAAC |
| Conservation | *****      | *****      | *****      | *****      | *****      | *****      |
|              | .... ....  | .... ....  | .... ....  | .... ....  | .... ....  | .... ....  |
|              | 4385       | 4395       | 4405       | 4415       | 4425       | 4435       |
| 2e_Brazil    | AATTCGAATA | GAGGAAAAGA | TAAAATTGAA | TTCTTGAAAA | CGGTTAAGCA | CAGCGTAGAA |
| 2e_Thai      | AATTCGAATA | GAGGAAAAGA | TAAAATTGAA | TTCTTGAAAA | CGGTTAAGCA | CAGCGTAGAA |
| Conservation | *****      | *****      | *****      | *****      | *****      | *****      |
|              | .... ....  | .... ....  | .... ....  | .... ....  | .... ....  | .... ....  |
|              | 4445       | 4455       | 4465       | 4475       | 4485       | 4495       |
| 2e_Brazil    | AGTAGTTCGA | ATAAGGTTGA | CATGGATCAG | ATAAATGAAA | GTATAGAAAA | ATCCGAACAA |
| 2e_Thai      | AGTAGTTCGA | ATAAGGTTGA | CATGGATCAG | ATAAATGAAA | GTATAGAAAA | ATCCGAACAA |
| Conservation | *****      | *****      | *****      | *****      | *****      | *****      |
|              | .... ....  | .... ....  | .... ....  | .... ....  | .... ....  | .... ....  |
|              | 4505       | 4515       | 4525       | 4535       | 4545       | 4555       |
| 2e_Brazil    | TATTTAAAGG | ATGTAGAAGC | TCTGGAGACA | CAAGCTGATA | ACAATCTAAA | GTCATACATA |
| 2e_Thai      | TATTTAAAGG | ATGTAGAAGC | TCTGGAGACA | CAAGCTGATA | ACAATCTAAA | GTCATACATA |
| Conservation | *****      | *****      | *****      | *****      | *****      | *****      |
|              | .... ....  | .... ....  | .... ....  | .... ....  | .... ....  | .... ....  |
|              | 4565       | 4575       | 4585       | 4595       | 4605       | 4615       |
| 2e_Brazil    | CAACATGAAC | AAACGATCAA | TGATACTTTC | CAGCAATCTG | AAATCTTAGG | AATAGAAACT |
| 2e_Thai      | CAACATGAAC | AAACGATCAA | TGATACTTTC | CAGCAATCTG | AAATCTTAGG | AATAGAAACT |
| Conservation | *****      | *****      | *****      | *****      | *****      | *****      |
|              | .... ....  | .... ....  | .... ....  | .... ....  | .... ....  | .... ....  |
|              | 4625       | 4635       | 4645       | 4655       | 4665       | 4675       |
| 2e_Brazil    | AAATCAAAAA | AGAAGTCAA  | CGAAGCAACA | GCAATAATGG | AAGAAATTA  | AAAACAAAAT |
| 2e_Thai      | AAATCAAAAA | AGAAGTCAA  | CGAAGCAACA | GCAATAATGG | AAGAAATTA  | AAAACAAAAT |
| Conservation | *****      | *****      | *****      | ***.*****  | *****      | *****      |
|              | .... ....  | .... ....  | .... ....  | .... ....  | .... ....  | .... ....  |
|              | 4685       | 4695       | 4705       | 4715       | 4725       | 4735       |
| 2e_Brazil    | TCTGAAATTC | AAACAAAGGT | GAATGATTTT | CAAGTAAAAC | TGAACAAATT | AAAGGAACCC |
| 2e_Thai      | TCTGAAATTC | AAACAAAGGT | GAATGATTTT | CAAGTAAAAC | TGAACAAATT | AAAGGAACCC |
| Conservation | *****      | *****      | *****      | *****      | *****      | *****      |
|              | .... ....  | .... ....  | .... ....  | .... ....  | .... ....  | .... ....  |
|              | 4745       | 4755       | 4765       | 4775       | 4785       | 4795       |
| 2e_Brazil    | CAAAATGCCG | AAGACGTAGA | AGAGGAGCTT | AATAATGAAA | AGTCTTCCAA | TGCAAAAGCA |
| 2e_Thai      | CAAAATGCCG | AAGACGTAGA | AGAGGAGCTT | AATAATGAAA | AGTCTTCCAA | TGCAAAAGCA |
| Conservation | *****      | *****      | *****      | *****      | *****      | *****      |
|              | .... ....  | .... ....  | .... ....  | .... ....  | .... ....  | .... ....  |
|              | 4805       | 4815       | 4825       | 4835       | 4845       | 4855       |
| 2e_Brazil    | CTTATACACA | CGAACCTAGA | AAGAGTGCAA | TCTAATTTAA | CCCAAGTTGC | CAATATTAAG |
| 2e_Thai      | CTTATACACA | CGAACCTAGA | AAGAGTGCAA | TCTAATTTAA | CCCAAGTTGC | CAATATTAAG |
| Conservation | *****      | *****      | *****      | *****      | *****      | *****      |

|              |            |            |            |            |            |             |
|--------------|------------|------------|------------|------------|------------|-------------|
|              | .... ....  | .... ....  | .... ....  | .... ....  | .... ....  | .... ....   |
|              | 4865       | 4875       | 4885       | 4895       | 4905       | 4915        |
| 2e_Brazil    | CAGGAAGTGG | ATGGCATATT | TAAGAGAGTC | ACAGACACGA | TGAATTCGGC | AACAGAAACC  |
| 2e_Thai      | CAGGAAGTGG | ATGGCATATT | TAAGAGAGTC | ACAGACACGA | TGAATTCGGC | AACAGAAACC  |
| Conservation | *****      | *****      | *****      | *****      | *****      | *****       |
|              | .... ....  | .... ....  | .... ....  | .... ....  | .... ....  | .... ....   |
|              | 4925       | 4935       | 4945       | 4955       | 4965       | 4975        |
| 2e_Brazil    | TCTCAAAATA | AAGATGGCAA | AACATTAGGC | ACGGTGAAAA | GGGACGAACC | TAAATATGAA  |
| 2e_Thai      | TCTCAAAATA | AAGATGGCAA | AACATTAGGC | ACGGTGAAAA | GGGACGAACC | TAAATATGAA  |
| Conservation | *****      | *****      | *****      | *****      | *****      | *****       |
|              | .... ....  | .... ....  | .... ....  | .... ....  | .... ....  | .... ....   |
|              | 4985       | 4995       | 5005       | 5015       | 5025       | 5035        |
| 2e_Brazil    | GAGTACTTAA | CCCAAATAAC | TGCAGATAAA | AATCTAATGG | ACGCAGAATT | GAATAAGCTA  |
| 2e_Thai      | GAGTACTTAA | CCCAAATAAC | TGCAGATAAA | AATCTAATGG | ACGCAGAATT | GAATAAGCTA  |
| Conservation | *****      | *****      | *****      | *****      | *****      | *****       |
|              | .... ....  | .... ....  | .... ....  | .... ....  | .... ....  | .... ....   |
|              | 5045       | 5055       | 5065       | 5075       | 5085       | 5095        |
| 2e_Brazil    | AACGGAATAA | GTTCCACTAT | CGAAATCTTA | GAAAAGGAAT | TGAATGAATC | CAGAATGAAT  |
| 2e_Thai      | AACGGAATAA | GTTCCACTAT | CGAAATCTTA | GAAAAGGAAT | TGAATGAATC | CAGAATGAAT  |
| Conservation | *****      | *****      | *****      | *****      | *****      | *****       |
|              | .... ....  | .... ....  | .... ....  | .... ....  | .... ....  | .... ....   |
|              | 5105       | 5115       | 5125       | 5135       | 5145       | 5155        |
| 2e_Brazil    | TACGAAATTG | GACTCCTGCA | AAAGATAGAT | GAAGTAGGCA | AAAGTAAGAA | GACAAATATT  |
| 2e_Thai      | TACGAAATTG | GACTCCTGCA | AAAGATAGAT | GAAGTAGGCA | AAAGTAAGAA | GACAAATATT  |
| Conservation | *****      | *****      | *****      | *****      | *****      | *****       |
|              | .... ....  | .... ....  | .... ....  | .... ....  | .... ....  | .... ....   |
|              | 5165       | 5175       | 5185       | 5195       | 5205       | 5215        |
| 2e_Brazil    | GATTTAAAAA | AAGAGTTAAT | AAGTTCACCG | CTGAATTCCT | TTTCTCCCT  | GTTCAATGGT  |
| 2e_Thai      | GATTTAAAAA | AAGAGTTAAT | AAGTTCACCG | CTGAATTCCT | TTTCTCCCT  | GTTCAATGGT  |
| Conservation | *****      | *****      | *****      | *****      | *****      | *****       |
|              | .... ....  | .... ....  | .... ....  | .... ....  | .... ....  | .... ....   |
|              | 5225       | 5235       | 5245       | 5255       | 5265       | 5275        |
| 2e_Brazil    | CTCGATTTAA | ATCAATACGA | ATTTAAGAAA | AACATAGATG | GTTACGAACA | GAAGATGAAA  |
| 2e_Thai      | CTCGATTTAA | ATCAATACGA | ATTTAAGAAA | AACATAGATG | GTTACGAACA | GAAGATGAAA  |
| Conservation | *****      | *****      | *****      | *****      | *****      | *****       |
|              | .... ....  | .... ....  | .... ....  | .... ....  | .... ....  | .... ....   |
|              | 5285       | 5295       | 5305       | 5315       | 5325       | 5335        |
| 2e_Brazil    | GAAATACAAG | GCAAATTTGA | CGTATCGCTG | AACAAAATTG | GTGAACATTT | AAAAAAGGCT  |
| 2e_Thai      | GAAATACAAG | GCAAATTTGA | CGTATCGCTG | AACAAAATTG | GTGAACATTT | AAAAAAGGCT  |
| Conservation | *****      | *****      | *****      | *****      | *****      | *****       |
|              | .... ....  | .... ....  | .... ....  | .... ....  | .... ....  | .... ....   |
|              | 5345       | 5355       | 5365       | 5375       | 5385       | 5395        |
| 2e_Brazil    | TCAGAGGAGG | GCGCAAATTA | TACCTTAGCG | AATAAACTCA | GACGAGAAGC | TCAACAGGAA  |
| 2e_Thai      | TCAGAGGAGG | GCGCAAATTA | TACCTTAGCG | AATAAACTCA | GACGAGAAGC | TCAACAGGAA  |
| Conservation | *****      | *****      | *****      | *****      | *****      | *****       |
|              | .... ....  | .... ....  | .... ....  | .... ....  | .... ....  | .... ....   |
|              | 5405       | 5415       | 5425       | 5435       | 5445       | 5455        |
| 2e_Brazil    | AAAGCCAAAC | TTACAAGTAG | CGAAGATGAA | GCAAGCAAAT | ACATAGAAGA | TATTA AAAAG |
| 2e_Thai      | AAAGCCAAAC | TTACAAGTAG | CGAAGATGAA | GCAAGCAAAT | ACATAGAAGA | TATTA AAAAG |
| Conservation | *****      | *****      | *****      | *****      | *****      | *****       |
|              | .... ....  | .... ....  | .... ....  | .... ....  | .... ....  | .... ....   |
|              | 5465       | 5475       | 5485       | 5495       | 5505       | 5515        |
| 2e_Brazil    | GTAGAATCCA | TAAGATTTAT | AAATCACATG | AAAGAAAATT | TAGACAAAAT | AAGCATATCG  |

|              |            |            |            |            |            |            |
|--------------|------------|------------|------------|------------|------------|------------|
| 2e_Thai      | GTAGAATCCA | TAAGATTAT  | AAATCACATG | AAAGAAAATT | TAGACAAAAT | AAGCACATCG |
| Conservation | *****      | *****      | *****      | *****      | *****      | *****      |
|              | .... ....  | .... ....  | .... ....  | .... ....  | .... ....  | .... ....  |
|              | 5525       | 5535       | 5545       | 5555       | 5565       | 5575       |
| 2e_Brazil    | ATCAAAGAAG | AAAAATTAAA | AATTAATGAA | GGACATGAAT | TCATCAAACA | GATAGTTGAA |
| 2e_Thai      | ATCAAAGAAG | AAAAATTAAA | AATTAATGAA | GGACATGAAT | TCATCAAACA | GATAGTTGAA |
| Conservation | *****      | *****      | *****      | *****      | *****      | *****      |
|              | .... ....  | .... ....  | .... ....  | .... ....  | .... ....  | .... ....  |
|              | 5585       | 5595       | 5605       | 5615       | 5625       | 5635       |
| 2e_Brazil    | GGCATTAAAA | ACACAGATGA | TGAACGCGAT | GTATCAAACA | AATTACAACA | GGCGGAAGGA |
| 2e_Thai      | GGCATTAAAA | ACACAGATGA | TGAACGCGAT | GTATCAAACA | AATTACAACA | GGCGGAAGGA |
| Conservation | *****      | *****      | *****      | *****      | *****      | *****      |
|              | .... ....  | .... ....  | .... ....  | .... ....  | .... ....  | .... ....  |
|              | 5645       | 5655       | 5665       | 5675       | 5685       | 5695       |
| 2e_Brazil    | AAAAATGAAG | AAATGCAGAA | AATAATGCAC | TCTAAGCATA | AAAACGAGGC | AAAAGAAATG |
| 2e_Thai      | AAAAATGAAG | AAATGCAGAA | AATAATGCAC | TCTAAGCATA | AAAACGAGGC | AAAAGAAATG |
| Conservation | *****      | *****      | *****      | *****      | *****      | *****      |
|              | .... ....  | .... ....  | .... ....  | .... ....  | .... ....  | .... ....  |
|              | 5705       | 5715       | 5725       | 5735       | 5745       | 5755       |
| 2e_Brazil    | CTAGGACATA | TAGCTACCTC | TGCAAATTTT | ATAAATATTA | AAATAATTCC | AGAATTAACT |
| 2e_Thai      | CTAGGACATA | TAGCTACCTC | TGCAAATTTT | ATAAATATTA | AAATAATTCC | AGAATTAACT |
| Conservation | *****      | *****      | *****      | *****      | *****      | *****      |
|              | .... ....  | .... ....  | .... ....  | .... ....  | .... ....  | .... ....  |
|              | 5765       | 5775       | 5785       | 5795       | 5805       | 5815       |
| 2e_Brazil    | CTAACCGAGT | CAAACGTAAA | CGAAGCAGTA | GAACTAAAAT | TTCAACCGGA | TGGCAAAGTA |
| 2e_Thai      | CTAACCGAGT | CAAACGTAAA | CGAAGCAGTA | GAACTAAAAT | TTCAACCGGA | TGGCAAAGTA |
| Conservation | *****      | *****      | *****      | *****      | *****      | *****      |
|              | .... ....  | .... ....  | .... ....  | .... ....  | .... ....  | .... ....  |
|              | 5825       | 5835       | 5845       | 5855       | 5865       | 5875       |
| 2e_Brazil    | ACCTTAAAAA | CAAGAAACAT | CTCGAAAAGC | GAAGCCGAAT | TGGATGTGCA | TAAAAATATA |
| 2e_Thai      | ACCTTAAAAA | CAAGAAACAT | CTCGAAAAGC | GAAGCCGAAT | TGGATGTGCA | TAAAAATATA |
| Conservation | *****      | *****      | *****      | *****      | *****      | *****      |
|              | .... ....  | .... ....  | .... ....  | .... ....  | .... ....  | .... ....  |
|              | 5885       | 5895       | 5905       | 5915       | 5925       | 5935       |
| 2e_Brazil    | AAGGAAGCTT | ACCATCTCGC | TTTGGAGATA | CAAAAATATG | CAAACGAAAT | AGACGCACAA |
| 2e_Thai      | AAGGAAGCTT | ACCATCTCGC | TTTGGAGATA | CAAAAATATG | CAAACGAAAT | AGACGCACAA |
| Conservation | *****      | *****      | *****      | *****      | *****      | *****      |
|              | .... ....  | .... ....  | .... ....  | .... ....  | .... ....  | .... ....  |
|              | 5945       | 5955       | 5965       | 5975       | 5985       | 5995       |
| 2e_Brazil    | CAAACGAATA | ACACACAGTT | AATGGTCACA | GTAAACGACC | TACATCATAA | AATTAAGTTC |
| 2e_Thai      | CAAACGAATA | ACACACAGTT | AATGGTCACA | GTAAACGACC | TACATCATAA | AATTAAGTTC |
| Conservation | *****      | *****      | *****      | *****      | *****      | *****      |
|              | .... ....  | .... ....  | .... ....  | .... ....  | .... ....  | .... ....  |
|              | 6005       | 6015       | 6025       | 6035       | 6045       | 6055       |
| 2e_Brazil    | ATAAATGAAT | TAAAAAATAA | AGTAAAAATT | GAAAAGAGTA | ATGAAAATTC | CCTATCGGGT |
| 2e_Thai      | ATAAATGAAT | TAAAAAATAA | AGTAAAAATT | GAAAAGAGTA | ATGAAAATTC | CCTATCGGGT |
| Conservation | *****      | *****      | *****      | *****      | *****      | *****      |
|              | .... ....  | .... ....  | .... ....  | .... ....  | .... ....  | .... ....  |
|              | 6065       | 6075       | 6085       | 6095       | 6105       | 6115       |
| 2e_Brazil    | AAAGTAATGG | GCATTTCTAA | CAAAATTGCC | GAATTAGACA | AACATTCATG | CAGTGAAAAA |
| 2e_Thai      | AAAGTAATGG | GCATTTCTAA | CAAAATTGCC | GAATTAGACA | AACATTCATG | CAGTGAAAAA |
| Conservation | *****      | *****      | *****      | *****      | *****      | *****      |

```

.....|.....| .....|.....| .....|.....| .....|.....| .....|.....|
    6125      6135      6145      6155      6165      6175
2e_Brazil  AGTTATGATA AATTTT TAGA AAACACGAAG AAAACAGATC TACAAAATAT ACGTGATTCC
2e_Thai    AGTTATGATA AATTTT TAGA AAACACGAAG AAAACAGATC TACAAAATAT ACGTGATTCC
Conservation *****
.....|.....| .....|.....| .....|.....| .....|.....| .....|.....|
    6185      6195      6205      6215      6225      6235
2e_Brazil  TTTAATCAAG AAAAGAGAAA CGCAATATT GACTTGAATT TGAAAAATAT AAAAGAAGAT
2e_Thai    TTTAATCAAG AAAAGAGAAA CGCAATATT GACTTGAATT TGAAAAATAT AAAAGAAGAT
Conservation *****
.....|.....| .....|.....| .....|.....| .....|.....| .....|.....|
    6245      6255      6265      6275      6285      6295
2e_Brazil  TTTGCCAATT CACAAACATC CTTAAAAATT GTTGAACAGG AAATTGAAGC TTTAAAGGCA
2e_Thai    TTTGCCAATT CACAAACATC CTTAAAAATT GTTGAACAGG AAATTGAAGC TTTAAAGGCA
Conservation *****
.....|.....| .....|.....| .....|.....| .....|.....| .....|.....|
    6305      6315      6325      6335      6345      6355
2e_Brazil  AATGAAATCA ACACTGAAAA TCTGCAAGGC AAATCTACTC AGATAGAAAC ACTACATAAC
2e_Thai    AATGAAATCA ACACTGAAAA TCTGCAAGGC AAATCTACTC AGATAGAAAC ACTACATAAC
Conservation *****
.....|.....| .....|.....| .....|.....| .....|.....| .....|.....|
    6365      6375      6385      6395      6405      6415
2e_Brazil  AAAATAGGAA GAATAGAACA AAATATTGCA AGTCTAAATA CGTCTTTGGA CAAATTACTA
2e_Thai    AAAATAGGAA GCATAGAACA AAATATTGCA AGTCTAAATA CGTCTTTGGA CAAATTACTA
Conservation *****
.....|.....| .....|.....| .....|.....| .....|.....| .....|.....|
    6425      6435      6445      6455      6465      6475
2e_Brazil  AACAGTGGAA AAAAATGCGA AATAGCTAGA TACACATCCT TGAGGGATAG TATTAAAG--
2e_Thai    AACAGTGGAA AAAAATGCGA AATAGCTAGA TACACATCCT TGAGGGATAG TATTAAAGGT
Conservation *****
.....|.....| .....|.....| .....|.....| .....|.....| .....|.....|
    6485      6495      6505      6515      6525      6535
2e_Brazil  -----
2e_Thai    AAAATAAATG CAGATGAAGA AACAATCGAT AATCTGCAGA AGCATGTTAG TCAATATTTG
Conservation -----
.....|.....| .....|.....| .....|.....| .....|.....| .....|.....|
    6545      6555      6565      6575      6585      6595
2e_Brazil  -----
2e_Thai    ACATATGTTG AAGATAACTA TAATGCCACA GTGAAGGACG TCCTTACATT AAATGAACAT
Conservation -----
.....|.....| .....|.....| .....|.....| .....|.....| .....|.....|
    6605      6615      6625      6635      6645      6655
2e_Brazil  -----
2e_Thai    TTNAGCAACA AAATGGTGAC TGATCATGCT GCGACTAATT TTGAAAAATC AAATAAAACT
Conservation -----
.....|.....| .....|.....| .....|.....| .....|.....| .....|.....|
    6665      6675      6685      6695      6705      6715
2e_Brazil  -----
2e_Thai    TCGGAAGAAT TATCCACAGC GGTCAATCAA TCAAAGGCCA TAATAAACGA TATAAAAAAT
Conservation -----

```

|              |            |            |            |            |            |            |
|--------------|------------|------------|------------|------------|------------|------------|
|              | .... ....  | .... ....  | .... ....  | .... ....  | .... ....  | .... ....  |
|              | 6725       | 6735       | 6745       | 6755       | 6765       | 6775       |
| 2e_Brazil    | -----      | -----      | -----      | -----      | -----      | -----      |
| 2e_Thai      | GCCTTCATAG | AAGTTAACGA | AAAAACGAA  | TTTACTTTGT | TAGAAAACAG | CGCACAAGCA |
| Conservation |            |            |            |            |            |            |
|              | .... ....  | .... ....  | .... ....  | .... ....  | .... ....  | .... ....  |
|              | 6785       | 6795       | 6805       | 6815       | 6825       | 6835       |
| 2e_Brazil    | -----      | -----      | -----      | -----      | ----TGGACG | AAATTTACAA |
| 2e_Thai      | ATAGAAAAGC | TTTACAATAC | ATTACATGAA | AAAAAAAAAC | GCAGTGGACG | AAATTTACAA |
| Conservation |            |            |            |            | *****      | *****      |
|              | .... ....  | .... ....  | .... ....  | .... ....  | .... ....  | .... ....  |
|              | 6845       | 6855       | 6865       | 6875       | 6885       | 6895       |
| 2e_Brazil    | AACATCCATT | TTAGTTAAAT | CGCAAAAAAT | GAAATCAAAT | GCTGATAAAT | ATACCGATAT |
| 2e_Thai      | AACATCCATT | TTAGTTAAAT | CGCAAAAAAT | GAAATCAAAT | GCTGATAAAT | ATACCGATAT |
| Conservation | *****      | *****      | *****      | *****      | *****      | *****      |
|              | .... ....  | .... ....  | .... ....  | .... ....  | .... ....  | .... ....  |
|              | 6905       | 6915       | 6925       | 6935       | 6945       | 6955       |
| 2e_Brazil    | GGCTAAAATA | TTTGAAAACG | TGTTAGACAC | CCAAAAATCG | AGAATTACAA | GTAACCAGAG |
| 2e_Thai      | GGCTAAAATA | TTTGAAAACG | TGTTAGACAC | CCAAAAATCG | AGAATTACAA | GTAACCAGAG |
| Conservation | *****      | *****      | *****      | *****      | *****      | *****      |
|              | .... ....  | .... ....  | .... ....  | .... ....  | .... ....  | .... ....  |
|              | 6965       | 6975       | 6985       | 6995       | 7005       | 7015       |
| 2e_Brazil    | TAGCGTATCC | CACGTTAAAG | ACGTGATAAA | TGTACAGCTT | AAGAAGTTAG | AAGCTACGGA |
| 2e_Thai      | TAGCGTATCC | CACGTTAAAG | ATATGATAAA | CGTACAGCTT | AAGAAGTTAG | AAGCTACGGA |
| Conservation | *****      | *****      | *.*****    | *****      | *****      | *****      |
|              | .... ....  | .... ....  | .... ....  | .... ....  | .... ....  | .... ....  |
|              | 7025       | 7035       | 7045       | 7055       | 7065       | 7075       |
| 2e_Brazil    | CAGCGCATTT | AAATTAGAAT | CCATAAATAA | GTTTCACGAA | TTAAGCGATA | ACATCAAAAC |
| 2e_Thai      | CAGCGCATTT | AAATTAGAAT | CCATAAATAA | GTTTCACGAA | TTAAGCGATA | ACATCAAAAA |
| Conservation | *****      | *****      | *****      | *****      | *****      | *****.     |
|              | .... ....  | .... ....  | .... ....  | .... ....  | .... ....  | .... ....  |
|              | 7085       | 7095       | 7105       | 7115       | 7125       | 7135       |
| 2e_Brazil    | GAGTATAGAT | GAATTGGAAA | AGCTAGAACA | AGTTAATCGC | CAAGAACATA | ATACTGTGGA |
| 2e_Thai      | GAGTATAGAT | GAATTGGAAA | AGCTAGAACA | AGTTAATCGC | CAAGAACATA | ATACTGTGGA |
| Conservation | *****      | *****      | *****      | *****      | *****      | *****      |
|              | .... ....  | .... ....  | .... ....  | .... ....  | .... ....  | .... ....  |
|              | 7145       | 7155       | 7165       | 7175       | 7185       | 7195       |
| 2e_Brazil    | AACGCATAAA | GAACGAATTA | CACATTTAAT | GAACAGAAGA | GACAGCCTCA | AAAATGGAGT |
| 2e_Thai      | AACGCATAAA | GAACGAATTA | CACATTTAAT | GAACAGAAGA | GACAGCCTCA | AAAATGGAGT |
| Conservation | *****      | *****      | *****      | *****      | *****      | *****      |
|              | .... ....  | .... ....  | .... ....  | .... ....  | .... ....  | .... ....  |
|              | 7205       | 7215       | 7225       | 7235       | 7245       | 7255       |
| 2e_Brazil    | GAAAGAATAC | GGAGAAGATG | CAAATTTAAA | AAAATTAAGA | GGGGATATCC | TAAACCAGGT |
| 2e_Thai      | GAAAGAATAC | GGAGAAGATG | CAAATTTAAA | AAAATTAAGA | GGGGATATCC | TAAACCAGGT |
| Conservation | *****      | *****      | *****      | *****      | *****      | *****      |
|              | .... ....  | .... ....  | .... ....  | .... ....  | .... ....  | .... ....  |
|              | 7265       | 7275       | 7285       | 7295       | 7305       | 7315       |
| 2e_Brazil    | AATTAGTGAC | ATAAGAAATA | TTAATGGAGA | ACTTAACAAC | TCAGATCAGC | TGTACGTCAA |
| 2e_Thai      | AATTAGTGAC | ATAAGAAATA | TTAATGGAGA | ACTTAACAAC | TCAGATCAGC | TGTACGTCAA |
| Conservation | *****      | *****      | *****      | *****      | *****      | *****      |

|              |            |            |             |            |            |             |
|--------------|------------|------------|-------------|------------|------------|-------------|
|              | .... ....  | .... ....  | .... ....   | .... ....  | .... ....  | .... ....   |
|              | 7325       | 7335       | 7345        | 7355       | 7365       | 7375        |
| 2e_Brazil    | ATTAATGAAA | AAAGTGGACG | AAAATAATGA  | TTTGTGTA   | AAGAACTATA | CAGAAAATTA  |
| 2e_Thai      | ATTAATGAAA | AAAGTGGACG | AAAATAATGA  | TTTGTGTA   | AAGAACTATA | CAGAAAATTA  |
| Conservation | *****      | *****      | *****       | *****      | *****      | *****       |
|              |            |            |             |            |            |             |
|              | .... ....  | .... ....  | .... ....   | .... ....  | .... ....  | .... ....   |
|              | 7385       | 7395       | 7405        | 7415       | 7425       | 7435        |
| 2e_Brazil    | CGTTTCTGAA | GTACTGCAAA | AAATCGATAA  | TCTGAATAAA | CGCTTCAAAC | AAAATTTACC  |
| 2e_Thai      | CGTTTCTGAA | GTACTGCAAA | AAATCGATAA  | TCTGAATAAA | CGCTTCAAAC | AAAATTTACC  |
| Conservation | *****      | *****      | *****       | *****      | *****      | *****       |
|              |            |            |             |            |            |             |
|              | .... ....  | .... ....  | .... ....   | .... ....  | .... ....  | .... ....   |
|              | 7445       | 7455       | 7465        | 7475       | 7485       | 7495        |
| 2e_Brazil    | AGAAAAGGAA | AAAGTTTTAC | AAATTGAGAG  | CAACTTTAAT | GAAATTAAAA | CCCTATTTGG  |
| 2e_Thai      | AGAAAAGAAA | AAAGTTTTAC | AAATTGAGAA  | CAACTTTAAT | GAAATTAAAA | CCCTATTTGG  |
| Conservation | *****.*    | *****      | *****.      | *****      | *****      | *****       |
|              |            |            |             |            |            |             |
|              | .... ....  | .... ....  | .... ....   | .... ....  | .... ....  | .... ....   |
|              | 7505       | 7515       | 7525        | 7535       | 7545       | 7555        |
| 2e_Brazil    | TGAAATAAAA | ACCTTTTATA | AGGTAGAAGA  | ATTTGTAACG | AACATGTATA | GTC AAGTTAA |
| 2e_Thai      | TGAAATAAAA | ACCTTTTATA | AGGTAGAAGA  | ATTTGTAACG | AACATGTATA | GTC AAGTTAA |
| Conservation | *****      | *****      | *****       | *****      | *****      | *****       |
|              |            |            |             |            |            |             |
|              | .... ....  | .... ....  | .... ....   | .... ....  | .... ....  | .... ....   |
|              | 7565       | 7575       | 7585        | 7595       | 7605       | 7615        |
| 2e_Brazil    | TGGTGAAAAG | GAACGCGTAA | AAGATCAGAC  | AAATATTGAA | AAAATAAAAT | TGGCAATACA  |
| 2e_Thai      | TGGTGAAAAG | GAACGCGTAA | AAGATCAGAC  | AAATATTGAA | AAAATAAAAT | TGGCAATACA  |
| Conservation | *****      | *****      | *****       | *****      | *****      | *****       |
|              |            |            |             |            |            |             |
|              | .... ....  | .... ....  | .... ....   | .... ....  | .... ....  | .... ....   |
|              | 7625       | 7635       | 7645        | 7655       | 7665       | 7675        |
| 2e_Brazil    | AAATATTACA | AATAACAATG | AAGAAGTAAA  | AACCTATTTA | TCCAAATTTA | TTAGACCCT   |
| 2e_Thai      | AAATATTACA | AATAACAATG | AAGAAGTAAA  | AACCTATTTA | TCCAAATTTA | TTAGACCCT   |
| Conservation | *****      | *****      | *****       | *****      | *****      | *****       |
|              |            |            |             |            |            |             |
|              | .... ....  | .... ....  | .... ....   | .... ....  | .... ....  | .... ....   |
|              | 7685       | 7695       | 7705        | 7715       | 7725       | 7735        |
| 2e_Brazil    | AGAAAGAATG | AATATCATGA | AAAAAGAAAT  | GGACGATTTA | TCCAGCTCAC | TGCCCACACA  |
| 2e_Thai      | AGAAAGAATG | AATATCATGA | AAAAAGAAAT  | GGACGATTTA | TCCAGCTCAC | TGCCCACACA  |
| Conservation | *****      | *****      | *****       | *****      | *****      | *****       |
|              |            |            |             |            |            |             |
|              | .... ....  | .... ....  | .... ....   | .... ....  | .... ....  | .... ....   |
|              | 7745       | 7755       | 7765        | 7775       | 7785       | 7795        |
| 2e_Brazil    | TAATACAAAT | GCAACAGAAA | ATGC AAAACG | GTTTGTAAAC | AGTTCGGTAG | AAATCATTAA  |
| 2e_Thai      | TAATACAAAT | GCAACAGAAA | ATGC AAAACG | GTTTGTAAAC | AGTTCGGTAG | AAATCATTAA  |
| Conservation | *****      | *****      | *****       | *****      | *****      | *****       |
|              |            |            |             |            |            |             |
|              | .... ....  | .... ....  | .... ....   | .... ....  | .... ....  | .... ....   |
|              | 7805       | 7815       | 7825        | 7835       | 7845       | 7855        |
| 2e_Brazil    | TGAGCTAACT | AGCTATATTT | CTAAAATAAC  | CGAACTAAAG | AATTATGCTG | AAGGTGTGAT  |
| 2e_Thai      | TGAGCTAACT | AGCTATATTT | CTAAAATAAC  | CGAACTAAAG | AATTATGCTG | AAGGTGTGAT  |
| Conservation | *****      | *****      | *****       | *****      | *****      | *****       |
|              |            |            |             |            |            |             |
|              | .... ....  | .... ....  | .... ....   | .... ....  | .... ....  | .... ....   |
|              | 7865       | 7875       | 7885        | 7895       | 7905       | 7915        |
| 2e_Brazil    | AACCGAATTA | GAAGAAGCAT | CTAAGTTAAT  | ACGCCAGCT  | GCTAATGACT | CAAATGAGAC  |
| 2e_Thai      | AACCGAATTA | GAAGAAGCAT | CTAAGTTAAT  | ACGCCAGCT  | GCTAATGACT | CAAATGAGAC  |
| Conservation | *****      | *****      | *****       | *****      | *****      | *****       |



```

      ....|....| ....|....| ....|....| ....|....| ....|....| ....|....|
      7925      7935      7945      7955      7965      7975
2e_Brazil  GCAAATGTTG CCAACCGAAG CTGATAGCAC ACATCAAGAC GATTCACAGA GTGATAATCG
2e_Thai    GCAAATGTTG CCAACCGAAG CTGATAGCAC ACATCAAGAC GATTCACAGA GTGATAATCG
Conservation *****

```

```

      ....|....| ....|....| ....|....| ....|....| ....|....| ....|....|
      7985      7995      8005      8015      8025      8035
2e_Brazil  TTCAAGGGCA AGAGATGCAG ATGGAAGAAC TCGTTATGCA GCAGCTATTA TTGGTTTGTC
2e_Thai    TTCAAGGGCA AGAGATGCAG ATGGAAGAAC TCGTTATGCA GCAGCTATTA TTGGTTTGTC
Conservation *****

```

```

      ....|....| ....|....| ....|....| ....|....| ....|....| ....|....|
      8045      8055      8065      8075      8085      8095
2e_Brazil  TCTTATTACC GGAGTTGCCG TATTAAGCCG CAGGCATAAT CCTGATGAAG AAGAGGATCA
2e_Thai    TCTTATTACC GGAGTTGCCG TATTAAGCCG CAGGCATAAT CCTGATGAAG AAGAGGATCA
Conservation *****

```

```

      ....|....| ....|....| ....|....| ....|....| ....|....| ....|....|
      8105      8115      8125      8135      8145      8155
2e_Brazil  TCATGAACAC GGCTATCATG AGGCATTGGA GGGCAACGAC GACTACACTG TGCACGATAA
2e_Thai    TCATGAACAC GGCTATCATG AGGCATTGGA GGGCAACGAC GACTACACTG TGCACGATAA
Conservation *****

```

```

      ....|....| ....|....| ....|....| ....|....|
      8165      8175      8185      8195
2e_Brazil  GGAAGAAGTC ATCGAAGTCT GTTCAATGA CAGTGATTAG
2e_Thai    GGAAGAAGTC ATCGAAGTCT GTTCAATGA CAGTGATTAG
Conservation *****

```

**Alignment: Pvrpb3**

```

      ....|.....| ....|.....| ....|.....| ....|.....| ....|.....|
      5          15          25          35          45          55
3_SalI  -----ATGA ACCAAATTAT AGCAGAAGGG AGAGG----- ----- -AAAGAAAAG
3_Thai  ATGAAGAAAA ACGGATGGTG GGGAGTATGC TTCGGGGTTC TTCTCTTTCT TATCGCTGGG
Conservation  *..* ** .*..... .* **.*.* ..**                *..*.....*

      ....|.....| ....|.....| ....|.....| ....|.....| ....|.....|
      65          75          85          95          105         115
3_SalI  GAAAAGCATT ACTG----TA AAAC TGCAAA GTGAAGAGGA AACGTCTTCT TCTGTTAATT
3_Thai  GAAATGCCAT AAACGAATCG AATAAACACA AAAAGGAGGA AACGACTTCT TCTGTTAATT
Conservation ****:*..* *.. . **.....**.* ..*.****** ***.***** *****

      ....|.....| ....|.....| ....|.....| ....|.....| ....|.....|
      125         135         145         155         165         175
3_SalI  CGTATTGGGG TAGACAACAT GAGTCAGAAT ACCCTGGAAG GAAGAAGAAA AATTTTAAAA
3_Thai  CGTATTGGGG TAGACAACAT GAGTCAGAAT ACCCTGGAAG GAAGAAGAAA AATTTTAAAA
Conservation ***** ** ***** ***** ***** *****

      ....|.....| ....|.....| ....|.....| ....|.....| ....|.....|
      185         195         205         215         225         235
3_SalI  AAAATAGCTT GTCCCCAGGA GAGGAGGGAT GTAGGAATGA TTGCCCCCCC AGCGGTAGTG
3_Thai  AAAATAGCTT GTCCCCAGGA GAGGAGGGAT GTAGGAATGA TTGCCCCCCC AGCGGTAGTG
Conservation ***** ***** ***** ***** ***** *****

      ....|.....| ....|.....| ....|.....| ....|.....| ....|.....|
      245         255         265         275         285         295
3_SalI  ATGGAACGA ATCAGGGTTA TTTAAGAAGA AAGCACTTAT ACATTTAAGA GATAGCAAAT
3_Thai  ATGGAACGA ATCAGGGTTA TTTAAGAAGA AAGCACTTAT ACATTTAAGA GATAGCAAAT
Conservation ***** ***** ***** ***** ***** *****

      ....|.....| ....|.....| ....|.....| ....|.....| ....|.....|
      305         315         325         335         345         355
3_SalI  TTAGAAGGAA GCCATCGCGG TATGCGTATA TTAAAAGAAA CGGTGAGAAC AATTTGGATA
3_Thai  TTAGAAGGAA GCCATCGCGG TATGCGTATA TTAAAAGAAA CGGTGAGAAC AATTTGGATA
Conservation ***** ***** ***** ***** ***** *****

      ....|.....| ....|.....| ....|.....| ....|.....| ....|.....|
      365         375         385         395         405         415
3_SalI  GACTTCCGAG TAGCACTGAG AAGGAGGAAA ATAATGACCG TAATGGAGGT GCCAGTTCCT
3_Thai  GACTTCCGAG TAGCACTGAG AAGGAGGAAA ATAATGACCG TAATGGAGGT GCCAGTTCCT
Conservation ***** ***** ***** ***** ***** *****

      ....|.....| ....|.....| ....|.....| ....|.....| ....|.....|
      425         435         445         455         465         475
3_SalI  TTTTACAAAA TTTGAACGTT CCCAATGTAG ACGAGATTTT AGATTATTTT GAGATTGTAG
3_Thai  TTTTACAAAA TTTGAACGTT CCCAATGTAG ACGAGATTTT AGATTATTTT GAGATTGTAG
Conservation ***** ***** ***** ***** ***** *****

      ....|.....| ....|.....| ....|.....| ....|.....| ....|.....|
      485         495         505         515         525         535
3_SalI  GTGAACAGGG AGAGTTAGTC TTTTCATTAG AATCATACTA TGTGGAGATC TACACGTGCA
3_Thai  GTGAACAGGG AGAGTTAGTC TTTTCATTAG AATCATACTA TGTGGAGATC TACACGTGCA
Conservation ***** ***** ***** ***** ***** *****

      ....|.....| ....|.....| ....|.....| ....|.....| ....|.....|
      545         555         565         575         585         595
3_SalI  AAGAAATTGT GCGTTTTATA AACCGCCAAG CGTTAACCAA CTTTAGCGGG AACTATGGGG
3_Thai  AAGAAATTGT GCGTTTTATA AACCGCCAAG CGTTAACCAA CTTTAGCGGG AACTATGGGG
Conservation ***** ***** ***** ***** ***** *****

```

|              |            |            |            |            |            |            |
|--------------|------------|------------|------------|------------|------------|------------|
|              | .... ....  | .... ....  | .... ....  | .... ....  | .... ....  | .... ....  |
|              | 605        | 615        | 625        | 635        | 645        | 655        |
| 3_SalI       | ATGATGATGG | TGAGGAGGAA | GAAGAAGATG | AGGATAGTGA | CTACAATTCT | GGGTAAAGAA |
| 3_Thai       | ATGATGATGG | TGAGGAGGAA | GAAGAAGATG | AGGATAGTGA | CTACAATTCT | GGGTAAAGAA |
| Conservation | *****      | *****      | *****      | *****      | *****      | *****      |
|              |            |            |            |            |            |            |
|              | .... ....  | .... ....  | .... ....  | .... ....  | .... ....  | .... ....  |
|              | 665        | 675        | 685        | 695        | 705        | 715        |
| 3_SalI       | AAGATTCCAG | GATACAAAAT | CTGTATCATC | ATATGAAACT | CTCCATGATT | TCTTGCATTT |
| 3_Thai       | AAGATTCCAG | GATACAAAAT | CTGTATCATC | ATATGAAACT | CTCCATGATT | TCTTGCATTT |
| Conservation | *****      | *****      | *****      | *****      | *****      | *****      |
|              |            |            |            |            |            |            |
|              | .... ....  | .... ....  | .... ....  | .... ....  | .... ....  | .... ....  |
|              | 725        | 735        | 745        | 755        | 765        | 775        |
| 3_SalI       | CTGAAAAGGT | GAAGCTACTA | AACGAAATAA | ATAGTTTGGA | ATACCCCAG  | GCAGAGGATA |
| 3_Thai       | CTGAAAAGGT | GAAGCTACTA | AACGAAATAA | ATAGTTTGGA | ATACCCCAG  | GCAGAGGATA |
| Conservation | *****      | *****      | *****      | *****      | *****      | *****      |
|              |            |            |            |            |            |            |
|              | .... ....  | .... ....  | .... ....  | .... ....  | .... ....  | .... ....  |
|              | 785        | 795        | 805        | 815        | 825        | 835        |
| 3_SalI       | GTGAAGAGGA | CTCAAGAGCA | GAGAATTCTA | CCACATACAA | ATTACTCATA | AATGAGTATG |
| 3_Thai       | GTGAAGAGGA | CTCAAGAGCA | GAGAATTCTA | CCACATACAA | ATTACTCATA | AATGAGTATG |
| Conservation | *****      | *****      | *****      | *****      | *****      | *****      |
|              |            |            |            |            |            |            |
|              | .... ....  | .... ....  | .... ....  | .... ....  | .... ....  | .... ....  |
|              | 845        | 855        | 865        | 875        | 885        | 895        |
| 3_SalI       | TAGATTGCTT | AAAGAAGTAT | AGCGAAAATG | TTAAAGGGAA | GATAGCGGAT | GCTAAGAAAA |
| 3_Thai       | TAGATTGCTT | AAAGAAGTAT | AGCGAAAATG | TTAAAGGGAA | GATAGCGGAT | GCTAAGAAAA |
| Conservation | *****      | *****      | *****      | *****      | *****      | *****      |
|              |            |            |            |            |            |            |
|              | .... ....  | .... ....  | .... ....  | .... ....  | .... ....  | .... ....  |
|              | 905        | 915        | 925        | 935        | 945        | 955        |
| 3_SalI       | GCATCGAAAC | AGAATATGGA | AATAAATTTT | GTCCTAATGA | GTGCAATTCT | AATGTGTATT |
| 3_Thai       | GCATCGAAAC | AGAATATGGA | AATAAATTTT | GTCCTAATGA | GTGCAATTCT | AATGTGTATT |
| Conservation | *****      | *****      | *****      | *****      | *****      | *****      |
|              |            |            |            |            |            |            |
|              | .... ....  | .... ....  | .... ....  | .... ....  | .... ....  | .... ....  |
|              | 965        | 975        | 985        | 995        | 1005       | 1015       |
| 3_SalI       | TTGAAAGTGT | ACATTTGTAC | CTCTCATATG | TCAATAATAA | TGCAGACATT | TTGTACAATT |
| 3_Thai       | TTGAAAGTGT | ACATTTGTAC | CTCTCATATG | TCAATAATAA | TGCAGACATT | TTGTACAATT |
| Conservation | *****      | *****      | *****      | *****      | *****      | *****      |
|              |            |            |            |            |            |            |
|              | .... ....  | .... ....  | .... ....  | .... ....  | .... ....  | .... ....  |
|              | 1025       | 1035       | 1045       | 1055       | 1065       | 1075       |
| 3_SalI       | CTAACATTAG | CGATGCGAAG | GAATTTTAA  | AATCTGGGAC | AAGCATTGTT | AGCATTATAG |
| 3_Thai       | CTAACATTAG | CGATGCGAAG | GAATTTTAA  | AATCTGGGAC | AAGCATTGTT | AGCATTATAG |
| Conservation | *****      | *****      | *****      | *****      | *****      | *****      |
|              |            |            |            |            |            |            |
|              | .... ....  | .... ....  | .... ....  | .... ....  | .... ....  | .... ....  |
|              | 1085       | 1095       | 1105       | 1115       | 1125       | 1135       |
| 3_SalI       | AGAAAGAAAT | AGGGTTAAAG | CATGTCATAA | GTTCTATAAA | GTTCTGCAA  | AGTGAATAA  |
| 3_Thai       | AGAAAGAAAT | AGGGTTAAAG | CATGTCATAA | GTTCTATAAA | GTTCTGCAA  | AGTGAATAA  |
| Conservation | *****      | *****      | *****      | *****      | *****      | *****      |
|              |            |            |            |            |            |            |
|              | .... ....  | .... ....  | .... ....  | .... ....  | .... ....  | .... ....  |
|              | 1145       | 1155       | 1165       | 1175       | 1185       | 1195       |
| 3_SalI       | ATAACATCAT | AAATAACTAC | AATTATCACA | TAAAGAATAT | AAAACTGCT  | ATCGATAATA |
| 3_Thai       | ATAACATCAT | AAATAACTAC | AATTATCACA | TAAAGAATAT | AAAACTGCT  | ATCGATAATA |
| Conservation | *****      | *****      | *****      | *****      | *****      | *****      |

```

.....|.....| .....|.....| .....|.....| .....|.....| .....|.....|
1205      1215      1225      1235      1245      1255
3_SalI    TAAAGGAGCA TGAAAAAAT GATAACTCTA TCGTGTTTGA TAAAAAAGC TTGGTGGAGA
3_Thai    TAAAGGAGCA TGAAAAAAT GATAACTCTA TCGTGTTTGA TAAAAAAGC TTGGTGGAGA
Conservation *****
.....|.....| .....|.....| .....|.....| .....|.....| .....|.....|
1265      1275      1285      1295      1305      1315
3_SalI    AAAGTTTCGA CTTGGCAAAA AACATGTCCG TTTACAAATT TAACAATGAG ATGTTCAATA
3_Thai    AAAGTTTCGA CTTGGCAAAA AACATGTCCG TTTACAAATT TAACAATGAG ATGTTCAATA
Conservation *****
.....|.....| .....|.....| .....|.....| .....|.....| .....|.....|
1325      1335      1345      1355      1365      1375
3_SalI    GGATGAAAGT ATTGTACGAT TTGAAGAGAA CTAAATTTAA AAAACTATTT ATTTTCTTAG
3_Thai    GAATGAAAGT ATTGTACGAT TTGAAGAGAA CTAAATTTAA AAAACTATTT ATTTTCTTAG
Conservation *.*****
.....|.....| .....|.....| .....|.....| .....|.....| .....|.....|
1385      1395      1405      1415      1425      1435
3_SalI    CAGAGGAGTT AGAGAATAAG CTTAACTCCT TTGCAGAGTC CGCGGAATTT CAGAAAACGT
3_Thai    CAGAGGAGTT AGAGAATAAG CTTAACTCCT TTGCAGAGTC CGCGGAATTT CAGAAAACGT
Conservation *****
.....|.....| .....|.....| .....|.....| .....|.....| .....|.....|
1445      1455      1465      1475      1485      1495
3_SalI    ATGACTCGAT AATTAACGAC TGGAAATTTA TCTTGGCATA CGCGAAAGAT GTATATAATA
3_Thai    ATGACTCGAT AATTAACGAC TGGAAATTTA TCTTGGCATA CGCGAAAGAT GTATATAATA
Conservation *****
.....|.....| .....|.....| .....|.....| .....|.....| .....|.....|
1505      1515      1525      1535      1545      1555
3_SalI    AAAATTTGAC CAAGATAAAA AATTACGAAG GGAATGAAAG TTTAGAAGTT ATCATAGTCA
3_Thai    AAAATTTGAC CAAGATAAAA AATTACGAAG GGAATGAAAG TTTAGAAGTT ATCATAGTCA
Conservation *****
.....|.....| .....|.....| .....|.....| .....|.....| .....|.....|
1565      1575      1585      1595      1605      1615
3_SalI    GAAATAAGGT GAAGGAAAAG CTAGCAACGT TGGAAGGTCT GGTAGACAAG TTAGAGGACC
3_Thai    GAAATAAGGT GAAGGAAAAG CTAGCAACGT TGGAAGGTCT GGTAGACAAG TTAGAGGACC
Conservation *****
.....|.....| .....|.....| .....|.....| .....|.....| .....|.....|
1625      1635      1645      1655      1665      1675
3_SalI    TATTTAATAT AATCAAATCG AAGTATGTAA TTATCATGTC AGCGAAATCG CTCATTGGGG
3_Thai    TATTTAATAT CATCAAATCG AAGTATGTAA TTATCATGTC AGCGAAATCG CTCATTGGGG
Conservation *****
.....|.....| .....|.....| .....|.....| .....|.....| .....|.....|
1685      1695      1705      1715      1725      1735
3_SalI    AACTGAAGGG GGAATTCAAA ACGGGAGAAA ATGTCGAGCA GAAATTTGAT GACCTCATAA
3_Thai    AACTGAAGGG GGAATTCAAA ACTGGAGAAA ATGTCGAGCA GAAATTTGAT GACCTCATAA
Conservation *****
.....|.....| .....|.....| .....|.....| .....|.....| .....|.....|
1745      1755      1765      1775      1785      1795
3_SalI    GATTAATGGA AACGATAAGC AGCAAATTA ACACGATGAA TGAAGGTATC GATACTGTAA
3_Thai    GATTAATGGA AACGATAAGC AGCAAATTA ACACGATGAA TGAAGGTATC GATACTGTAA
Conservation *****

```

|              |            |            |             |             |             |            |
|--------------|------------|------------|-------------|-------------|-------------|------------|
|              | .... ....  | .... ....  | .... ....   | .... ....   | .... ....   | .... ....  |
|              | 1805       | 1815       | 1825        | 1835        | 1845        | 1855       |
| 3_SalI       | ATAAGACCTA | CTCCAGCATT | AAGTATGTAC  | AAATACAAAT  | CGAAAACCTTA | AGCACTTCTA |
| 3_Thai       | ATAAGACCTA | CTCCAGCATT | AAGTATGTAC  | AAATACAAAT  | CGAAAACCTTA | AGCACTTCTA |
| Conservation | *****      | *****      | *****       | *****       | *****       | *****      |
|              | .... ....  | .... ....  | .... ....   | .... ....   | .... ....   | .... ....  |
|              | 1865       | 1875       | 1885        | 1895        | 1905        | 1915       |
| 3_SalI       | TCGATGGGTA | CATGAACGAA | ATAGATGCCT  | TAAAAGCTAA  | GGGGTCAACG  | AATGATCATA |
| 3_Thai       | TCGATGGGTA | CATGAACGAA | ATAGATGCCT  | TAAAAGCTAA  | GGGGTCAACG  | AATGATCATA |
| Conservation | *****      | *****      | *****       | *****       | *****       | *****      |
|              | .... ....  | .... ....  | .... ....   | .... ....   | .... ....   | .... ....  |
|              | 1925       | 1935       | 1945        | 1955        | 1965        | 1975       |
| 3_SalI       | TTAGAGAAGA | AATGGTGTCC | AAAATGTTGT  | TCATTACGGA  | AAATATCAAC  | AATTTGAAAA |
| 3_Thai       | TTAGAGAAGA | AATGGTGTCC | AAAATGTTGT  | TCATTACGGA  | AAATATCAAC  | AATTTGAAAA |
| Conservation | *****      | *****      | *****       | *****       | *****       | *****      |
|              | .... ....  | .... ....  | .... ....   | .... ....   | .... ....   | .... ....  |
|              | 1985       | 1995       | 2005        | 2015        | 2025        | 2035       |
| 3_SalI       | AAATTCCTTC | CCTGGAGGAG | AAGGCAAACG  | AAAAATTATTC | GCAAATTGAT  | GAATTAATTA |
| 3_Thai       | AAATTCCTTC | CCTGGAGGAG | AAGGCAAACG  | AAAAATTATTC | GCAAATTGAT  | GAATTAATTA |
| Conservation | *****      | *****      | *****       | *****       | *****       | *****      |
|              | .... ....  | .... ....  | .... ....   | .... ....   | .... ....   | .... ....  |
|              | 2045       | 2055       | 2065        | 2075        | 2085        | 2095       |
| 3_SalI       | TGGGAACATC | GTTAGATATG | AACGAAATTA  | TAGATAAAAA  | AAGTGACGCG  | TATAATAAAA |
| 3_Thai       | TGGGAACATC | GTTAGATATG | AACGAAATTA  | TAGATAAAAA  | AAGTGACGCG  | TATAATAAAA |
| Conservation | *****      | *****      | *****       | *****       | *****       | *****      |
|              | .... ....  | .... ....  | .... ....   | .... ....   | .... ....   | .... ....  |
|              | 2105       | 2115       | 2125        | 2135        | 2145        | 2155       |
| 3_SalI       | TAAAAATGAT | TATTAAGAT  | GTTTATGAAG  | GCAATTTGAA  | GGACTTTCTA  | GACGAACTGT |
| 3_Thai       | TAAAAATGAT | TATTAAGAT  | GTTTATGAAG  | GCAATTTGAA  | GGACTTTCTA  | GACGAACTGT |
| Conservation | *****      | *****      | *****       | *****       | *****       | *****      |
|              | .... ....  | .... ....  | .... ....   | .... ....   | .... ....   | .... ....  |
|              | 2165       | 2175       | 2185        | 2195        | 2205        | 2215       |
| 3_SalI       | CTCTTAATGT | AGACAAGAAT | AGAAATTTCCA | TCAACCAAAG  | TAGTTCTACG  | AACGAACTGG |
| 3_Thai       | CTCTTAATGT | AGACAAGAAT | AGAAATTTCCA | TCAACCAAAG  | TAGTTCTACG  | AACGAACTGG |
| Conservation | *****      | *****      | *****       | *****       | *****       | *****      |
|              | .... ....  | .... ....  | .... ....   | .... ....   | .... ....   | .... ....  |
|              | 2225       | 2235       | 2245        | 2255        | 2265        | 2275       |
| 3_SalI       | ATGGCGTGTT | AAATAATATA | AAAGGTGATT  | ATGAGAAAAT  | GAAATCTATC  | AAATGTGATA |
| 3_Thai       | ATGGCGTGTT | AAATAATATA | AAAGGTGATT  | ATGAGAAAAT  | GAAATCTATC  | AAATGTGATA |
| Conservation | *****      | *****      | *****       | *****       | *****       | *****      |
|              | .... ....  | .... ....  | .... ....   | .... ....   | .... ....   | .... ....  |
|              | 2285       | 2295       | 2305        | 2315        | 2325        | 2335       |
| 3_SalI       | ATATATCAGA | ATCTTTGCAG | AACATAACGA  | ATGAACTCAA  | AATTATTTCA  | GACGCCAAAG |
| 3_Thai       | ATATATCAGA | ATCTTTGCAG | AACATAACGA  | ATGAACTCAA  | AATTATTTCA  | GACGCCAAAG |
| Conservation | *****      | *****      | *****       | *****       | *****       | *****      |
|              | .... ....  | .... ....  | .... ....   | .... ....   | .... ....   | .... ....  |
|              | 2345       | 2355       | 2365        | 2375        | 2385        | 2395       |
| 3_SalI       | AGGAAATTTT | AAAAATCCAA | TTCCGGAGATA | TCAATGAAAA  | ATTAACAAAC  | TCGTTAGAGC |
| 3_Thai       | AGGAAATTTT | AAAAATCCAA | TTCCGGAGATA | TCAATGAAAA  | ATTAACAAAC  | TCGTTAGAGC |
| Conservation | *****      | *****      | *****       | *****       | *****       | *****      |

|              |            |            |            |            |            |            |
|--------------|------------|------------|------------|------------|------------|------------|
|              | .... ....  | .... ....  | .... ....  | .... ....  | .... ....  | .... ....  |
|              | 2405       | 2415       | 2425       | 2435       | 2445       | 2455       |
| 3_SalI       | AACTTCAGAG | TGTCTACGAC | AAATTACAAG | TTAGCACAAC | AGAGTATACA | GCGGGAAAGG |
| 3_Thai       | AACTTCAGAG | TGTCTACGAC | AAATTACAAG | TTAGCACAAC | AGAGTATACA | GCGGGAAAGG |
| Conservation | *****      | *****      | *****      | *****      | *****      | *****      |
|              | .... ....  | .... ....  | .... ....  | .... ....  | .... ....  | .... ....  |
|              | 2465       | 2475       | 2485       | 2495       | 2505       | 2515       |
| 3_SalI       | GGAAGATTGA | GGAATACAAA | ACGGTTATAC | TAAAGGGGGA | AAAAGAATTT | TTTGACAAAG |
| 3_Thai       | GGAAGATTGA | GGAATACAAA | ACGGTTATAC | TAAAGGGGGA | AAAAGAATTT | TTTGACAAAG |
| Conservation | *****      | *****      | *****      | *****      | *****      | *****      |
|              | .... ....  | .... ....  | .... ....  | .... ....  | .... ....  | .... ....  |
|              | 2525       | 2535       | 2545       | 2555       | 2565       | 2575       |
| 3_SalI       | CGTATGATAA | GGATGAAGAT | ATGTTAGAAG | TGAAAGATGC | TTACGCAAAT | TTTCTCAAAC |
| 3_Thai       | CGTATGATAA | GGATGAAGAT | ATGTTAGAAG | TGAAAGATGC | TTACGCAAAT | TTTCTCAAAC |
| Conservation | *****      | *****      | *****      | *****      | *****      | *****      |
|              | .... ....  | .... ....  | .... ....  | .... ....  | .... ....  | .... ....  |
|              | 2585       | 2595       | 2605       | 2615       | 2625       | 2635       |
| 3_SalI       | ATAAGGATAA | TCTCCTCAAG | AACAGAAGTA | AAGTGTTTGA | AGAATTCCAT | ATGGCGAAAG |
| 3_Thai       | ATAAGGATAA | TCTCCTCAAG | AACAGAAGTA | AAGTGTTTGA | AGAATTCCAT | ATGGCGAAAG |
| Conservation | *****      | *****      | *****      | *****      | *****      | *****      |
|              | .... ....  | .... ....  | .... ....  | .... ....  | .... ....  | .... ....  |
|              | 2645       | 2655       | 2665       | 2675       | 2685       | 2695       |
| 3_SalI       | AGGCCCTAAA | AACGGCTAGG | ATTTACCTCC | TATCTTATGT | AGATGTGCCG | GAAAAATATA |
| 3_Thai       | AGGCCCTAAA | AACGGCTAGG | ATTTACCTCC | TATCTTATGT | AGATGTGCCG | GAAAAATATA |
| Conservation | *****      | *****      | *****      | *****      | *****      | *****      |
|              | .... ....  | .... ....  | .... ....  | .... ....  | .... ....  | .... ....  |
|              | 2705       | 2715       | 2725       | 2735       | 2745       | 2755       |
| 3_SalI       | ACATTATCAA | GGGGGAAACA | AATCAAAAAT | ATAAAAAGAT | AATACAAGAA | ATTAATGACA |
| 3_Thai       | ACATTATCAA | GGGGGAAACA | AATCAAAAAT | ATAAAAAGAT | AATACAAGAA | ATTAATGACA |
| Conservation | *****      | *****      | *****      | *****      | *****      | *****      |
|              | .... ....  | .... ....  | .... ....  | .... ....  | .... ....  | .... ....  |
|              | 2765       | 2775       | 2785       | 2795       | 2805       | 2815       |
| 3_SalI       | AAGATGTCGA | TATCAAATTG | GAAGAATACG | AAGCAGACTT | CAACAGGGAC | AACCAATTAT |
| 3_Thai       | AAGATGTCGA | TATCAAATTG | GAAGAATACG | AAGCAGACTT | CAACAGGGAC | AACCAATTAT |
| Conservation | *****      | *****      | *****      | *****      | *****      | *****      |
|              | .... ....  | .... ....  | .... ....  | .... ....  | .... ....  | .... ....  |
|              | 2825       | 2835       | 2845       | 2855       | 2865       | 2875       |
| 3_SalI       | CCGATAGCAT | CATAAAGGAA | GTGGACCAAT | CAAATAAAAA | TTTGTCTAAC | CTGAAAATTT |
| 3_Thai       | CCGATAGCAT | CATAAAGGAA | GTGGACCAAT | CAAATAAAAA | TTTGTCTAAC | CTGAAAATTT |
| Conservation | *****      | *****      | *****      | *****      | *****      | *****      |
|              | .... ....  | .... ....  | .... ....  | .... ....  | .... ....  | .... ....  |
|              | 2885       | 2895       | 2905       | 2915       | 2925       | 2935       |
| 3_SalI       | TAAACAAGTC | TATTAAAGAT | TGCTCCACGG | ATAGCAACAT | TATCGAAGAA | TTAATTAGCA |
| 3_Thai       | TAAACAAGTC | TATTAAAGAT | TGCTCCACGG | ATAGCAACAT | TATCGAAGAA | TTAATTAGCA |
| Conservation | *****      | *****      | *****      | *****      | *****      | *****      |
|              | .... ....  | .... ....  | .... ....  | .... ....  | .... ....  | .... ....  |
|              | 2945       | 2955       | 2965       | 2975       | 2985       | 2995       |
| 3_SalI       | AAAATAATTC | TCTGAAGGAA | AAAATTATTT | CCGAAAGGAA | AGAAATAGAA | GAAGATAATT |
| 3_Thai       | AAAATAATTC | TCTGAAGGAA | AAAATTATTT | CCGAAAGGAA | AGAAATAGAA | GAAGATAATT |
| Conservation | *****      | *****      | *****      | *****      | *****      | *****      |

|              |             |             |            |            |             |             |
|--------------|-------------|-------------|------------|------------|-------------|-------------|
|              | .... ....   | .... ....   | .... ....  | .... ....  | .... ....   | .... ....   |
|              | 3005        | 3015        | 3025       | 3035       | 3045        | 3055        |
| 3_SalI       | TCATGGAACA  | ACATGTGAAG  | ATAAATTTAA | AAATCAAATT | GAACGATGCT  | CGTATTACTC  |
| 3_Thai       | TCATGGAACA  | ACATGTGAAG  | ATAAATTTAA | AAATCAAATT | GAACGATGCT  | CGTATTACTC  |
| Conservation | *****       | *****       | *****      | *****      | *****       | *****       |
|              | .... ....   | .... ....   | .... ....  | .... ....  | .... ....   | .... ....   |
|              | 3065        | 3075        | 3085       | 3095       | 3105        | 3115        |
| 3_SalI       | TTGAAAACAA  | ATTGTATGAC  | AACAATTTGA | CGAACTTGAA | GACACAAATT  | AAGAATATTC  |
| 3_Thai       | TTGAAAACAA  | ATTGTATGAC  | AACAATTTGA | CGAACTTGAA | GACACAAATT  | AAGAATATTC  |
| Conservation | *****       | *****       | *****      | *****      | *****       | *****       |
|              | .... ....   | .... ....   | .... ....  | .... ....  | .... ....   | .... ....   |
|              | 3125        | 3135        | 3145       | 3155       | 3165        | 3175        |
| 3_SalI       | TCGATTTTCA  | CACAAGTTCG  | AAGGAAAAAT | ATAAAGATTT | GAACGAAAACA | GACCTGAAGA  |
| 3_Thai       | TCGATTTTCA  | CACAAGTTCG  | AAGGAAAAAT | ATAAAGATTT | GAACGAAAACA | GACCTGAAGA  |
| Conservation | *****       | *****       | *****      | *****      | *****       | *****       |
|              | .... ....   | .... ....   | .... ....  | .... ....  | .... ....   | .... ....   |
|              | 3185        | 3195        | 3205       | 3215       | 3225        | 3235        |
| 3_SalI       | AAATAAAAAGA | AAATGAAGAG  | TGGAAAAGCG | CTAAGGAATT | GATATACGCT  | CTTAATGTCTG |
| 3_Thai       | AAATAAAAAGA | AAATGAAGAG  | TGGAAAAGCG | CTAAGGAATT | GATATACGCT  | CTTAATGTCTG |
| Conservation | *****       | *****       | *****      | *****      | *****       | *****       |
|              | .... ....   | .... ....   | .... ....  | .... ....  | .... ....   | .... ....   |
|              | 3245        | 3255        | 3265       | 3275       | 3285        | 3295        |
| 3_SalI       | AATACGAAAT  | ATTGAAGAAG  | CAAGCGGATG | GTCTGATCAG | CAGCAAAAAT  | AGTGAAATTA  |
| 3_Thai       | AATACGAAAT  | ATTGAAGAAG  | CAAGCGGATG | GTCTGATCAG | CAGCAAAAAT  | AGTGAAATTA  |
| Conservation | *****       | *****       | *****      | *****      | *****       | *****       |
|              | .... ....   | .... ....   | .... ....  | .... ....  | .... ....   | .... ....   |
|              | 3305        | 3315        | 3325       | 3335       | 3345        | 3355        |
| 3_SalI       | TAAATGGAT   | AGGCAACAGA  | ATAGTGGAAA | AGAATAAAGA | AATAAATGAA  | AAAGTGGATG  |
| 3_Thai       | TAAATGGAT   | AGGCAACAGA  | ATAGTGGAAA | AGAATAAAGA | AATAAATGAA  | AAAGTGGATG  |
| Conservation | *****       | *****       | *****      | *****      | *****       | *****       |
|              | .... ....   | .... ....   | .... ....  | .... ....  | .... ....   | .... ....   |
|              | 3365        | 3375        | 3385       | 3395       | 3405        | 3415        |
| 3_SalI       | AACATGTAAA  | TTCGTTTCGAT | GAAATTGTTG | TAAAATCTAA | GTCGCCCAGT  | TTTGTTCAGAG |
| 3_Thai       | AACATGTAAA  | TTCGTTTCGAT | GAAATTGTTG | TAAAATCTAA | GTCGCCCAGT  | TTTGTTCAGAG |
| Conservation | *****       | *****       | *****      | *****      | *****       | *****       |
|              | .... ....   | .... ....   | .... ....  | .... ....  | .... ....   | .... ....   |
|              | 3425        | 3435        | 3445       | 3455       | 3465        | 3475        |
| 3_SalI       | ATGTTAATCA  | CTACCAAAAT  | GGTGAGAATA | AAGAAAAGGC | AAGACAGTTT  | AATGCAGAAG  |
| 3_Thai       | ATGTTAATCA  | CTACCAAAAT  | GGTGAGAATA | AAGAAAAGGC | AAGACAGTTT  | AATGCAGAAG  |
| Conservation | *****       | *****       | *****      | *****      | *****       | *****       |
|              | .... ....   | .... ....   | .... ....  | .... ....  | .... ....   | .... ....   |
|              | 3485        | 3495        | 3505       | 3515       | 3525        | 3535        |
| 3_SalI       | TGGAAGCTCT  | CGTTCGGAAG  | ATCGAAACAG | AAAAGGAAAA | GTTTAACAAA  | ATTAAAACAA  |
| 3_Thai       | TGGAAGCTCT  | CGTTCGGAAG  | ATCGAAACAG | AAAAGGAAAA | GTTTAACAAA  | ATTAAAACAA  |
| Conservation | *****       | *****       | *****      | *****      | *****       | *****       |
|              | .... ....   | .... ....   | .... ....  | .... ....  | .... ....   | .... ....   |
|              | 3545        | 3555        | 3565       | 3575       | 3585        | 3595        |
| 3_SalI       | ATTCTAATGA  | ATACTTGGTA  | CAAGCAAATC | GAAAGAAAAG | CGAAAATGTA  | GATTTCAAGG  |
| 3_Thai       | ATTCTAATGA  | ATACTTGGTA  | CAAGCAAATC | GAAAGAAAAG | CGAAAATGTA  | GATTTCAAGG  |
| Conservation | *****       | *****       | *****      | *****      | *****       | *****       |

|              |            |            |            |            |            |            |
|--------------|------------|------------|------------|------------|------------|------------|
|              | .... ....  | .... ....  | .... ....  | .... ....  | .... ....  | .... ....  |
|              | 3605       | 3615       | 3625       | 3635       | 3645       | 3655       |
| 3_SalI       | CCAAGGAAAA | GGCCATGAAA | GAAGTGACG  | AACAAATTAG | AAGCGCATCA | GAAGAACTGA |
| 3_Thai       | CCAAGGAAAA | GGCCATGAAA | GAAGTGACG  | AACAAATTAG | AAGCGCATCA | GAAGAACTGA |
| Conservation | *****      | *****      | *****      | *****      | *****      | *****      |
|              | .... ....  | .... ....  | .... ....  | .... ....  | .... ....  | .... ....  |
|              | 3665       | 3675       | 3685       | 3695       | 3705       | 3715       |
| 3_SalI       | ATAACTCACT | GAAGGAAATT | CCCACACTGA | ATGATTTACA | GAAGATAGAA | TTAAAATTTG |
| 3_Thai       | ATAACTCACT | GAAGGAAATT | CCCACACTGA | ATGATTTACA | GAAGATAGAA | TTAAAATTTG |
| Conservation | *****      | *****      | *****      | *****      | *****      | *****      |
|              | .... ....  | .... ....  | .... ....  | .... ....  | .... ....  | .... ....  |
|              | 3725       | 3735       | 3745       | 3755       | 3765       | 3775       |
| 3_SalI       | AAAAAAACGA | AATTCACGAT | ATGGTTAATC | AGATTACCAC | TGAGCAGAAA | AAGTGTGAGC |
| 3_Thai       | AAAAAAACGA | AATTCACGAT | ATGGTTAATC | AGATTACCAC | TGAGCAGAAA | AAGTGTGAGC |
| Conservation | *****      | *****      | *****      | *****      | *****      | *****      |
|              | .... ....  | .... ....  | .... ....  | .... ....  | .... ....  | .... ....  |
|              | 3785       | 3795       | 3805       | 3815       | 3825       | 3835       |
| 3_SalI       | AGGAAATGGC | AGAAATCAAT | TCTTGTAAAC | ATGATATAGA | TGAAATGAAG | AGGGCAAAC  |
| 3_Thai       | AGGAAATGGC | AGAAATCAAT | TCTTGTAAAC | ATGATATAGA | TGAAATGAAG | AGGGCAAAC  |
| Conservation | *****      | *****      | *****      | *****      | *****      | *****      |
|              | .... ....  | .... ....  | .... ....  | .... ....  | .... ....  | .... ....  |
|              | 3845       | 3855       | 3865       | 3875       | 3885       | 3895       |
| 3_SalI       | CGGGAGAAGA | GACTCCCGAT | TCCCCTTTAT | TTGTATATAC | CGAATTTTAC | GAAAAAGCGG |
| 3_Thai       | CGGGAGAAGA | GACTCCCGAT | TCCCCTTTAT | TTGTATATAC | CGAATTTTAC | GAAAAAGCGG |
| Conservation | *****      | *****      | *****      | *****      | *****      | *****      |
|              | .... ....  | .... ....  | .... ....  | .... ....  | .... ....  | .... ....  |
|              | 3905       | 3915       | 3925       | 3935       | 3945       | 3955       |
| 3_SalI       | TAAGCAGTCA | TGGGACTATC | AAAGCCCGTT | TTAACGAGGC | TACCGGGTTA | AATGGGAAGT |
| 3_Thai       | TAAGCAGTCA | TGGGACTATC | AAAGCCCGTT | TTAACGAGGC | TACCGGGCTA | AATGGGAAGT |
| Conservation | *****      | *****      | *****      | *****      | *****      | *****      |
|              | .... ....  | .... ....  | .... ....  | .... ....  | .... ....  | .... ....  |
|              | 3965       | 3975       | 3985       | 3995       | 4005       | 4015       |
| 3_SalI       | GTGAGAGTAG | CGAAAATATT | AACGAAATAA | AGGGAATGAA | AAAGCAGATT | GATTGTTATT |
| 3_Thai       | GTGAGAGTAG | CGAAAATATT | AACGAAATAA | AGGGAATGAA | AAAGCAGATT | GATTGTTATT |
| Conservation | *****      | *****      | *****      | *****      | *****      | *** *****  |
|              | .... ....  | .... ....  | .... ....  | .... ....  | .... ....  | .... ....  |
|              | 4025       | 4035       | 4045       | 4055       | 4065       | 4075       |
| 3_SalI       | TGAGAGAAAT | TTTAACAAAT | TATGGCACCT | TGCATGAAGC | GTTGGGCGAT | ATTAAAAATA |
| 3_Thai       | TGAGAGAAAT | TTTAACAAAT | TATGGCACCT | TGCATGAAGC | GTTGGGCGAT | ATTAAAAATA |
| Conservation | *****      | *****      | *****      | *****      | *****      | *****      |
|              | .... ....  | .... ....  | .... ....  | .... ....  | .... ....  | .... ....  |
|              | 4085       | 4095       | 4105       | 4115       | 4125       | 4135       |
| 3_SalI       | TGAAGGAAAT | GCTGATGGAT | GTGGATGTTT | AAGAAATTGT | GCGTCTGGTG | GAGAAGGATG |
| 3_Thai       | TGAAGGAAAT | GCTGATGGAT | GTGGATGTTT | AAGAAATTGT | GCGTCTGGTG | GAGAAGGATG |
| Conservation | *****      | *****      | *****      | *****      | *****      | *****      |
|              | .... ....  | .... ....  | .... ....  | .... ....  | .... ....  | .... ....  |
|              | 4145       | 4155       | 4165       | 4175       | 4185       | 4195       |
| 3_SalI       | AGACAGAAGC | GCAGAAATAT | GCCACGTTGG | TGAAAAGTGA | GCAGGCCAAA | TCAGATGCCC |
| 3_Thai       | AGACAGAAGC | GCAGAAATAT | GCCACGTTGG | TGAAAAGTGA | GCAGGCCAAA | TCAGATGCCC |
| Conservation | *****      | *****      | *****      | *****      | *****      | *****      |



|              |            |            |            |            |            |            |
|--------------|------------|------------|------------|------------|------------|------------|
|              | .... ....  | .... ....  | .... ....  | .... ....  | .... ....  | .... ....  |
|              | 4205       | 4215       | 4225       | 4235       | 4245       | 4255       |
| 3_SalI       | TAATTAAGA  | ATTAGATAAA | CATTTCACAG | AAGCAACGAG | GCTAAAAACG | GAAATGAATA |
| 3_Thai       | TAATTAAGA  | ATTAGATAAA | CATTTCACAG | AAGCAACGAG | GCTAAAAACG | GAAATGAATA |
| Conservation | *****      | *****      | *****      | *****      | *****      | *****      |
|              |            |            |            |            |            |            |
|              | .... ....  | .... ....  | .... ....  | .... ....  | .... ....  | .... ....  |
|              | 4265       | 4275       | 4285       | 4295       | 4305       | 4315       |
| 3_SalI       | AAAATTTATC | CATCCAAAGA | ATCGATGAAA | TTGTCAATGA | AATTATGAAA | TATAAGGACG |
| 3_Thai       | AAAATTTATC | CATCCAAAGA | ATCGATGAAA | TTGTCAATGA | AATTATGAAA | TATAAGGACG |
| Conservation | *****      | *****      | *****      | *****      | *****      | *****      |
|              |            |            |            |            |            |            |
|              | .... ....  | .... ....  | .... ....  | .... ....  | .... ....  | .... ....  |
|              | 4325       | 4335       | 4345       | 4355       | 4365       | 4375       |
| 3_SalI       | AAATAGCACA | CCGGAAGAA  | GAAATGAACA | ATTATTTGAA | GAACTCCAAG | GAGTATAAGG |
| 3_Thai       | AAATAGCACA | CCGGAAGAA  | GAAATGAACA | ATTATTTGAA | GAACTCCAAG | GAGTATAAGG |
| Conservation | *****      | *****      | *****      | *****      | *****      | *****      |
|              |            |            |            |            |            |            |
|              | .... ....  | .... ....  | .... ....  | .... ....  | .... ....  | .... ....  |
|              | 4385       | 4395       | 4405       | 4415       | 4425       | 4435       |
| 3_SalI       | ATAAGGCTTT | TCTGCATTAC | CGTAACGCAG | ACAGGAGAAA | GAAAAAGCTA | CAACATTTGA |
| 3_Thai       | ATAAGGCTTT | TCTGCATTAC | CGTAACGCAG | ACAGGAGAAA | GAAAAAGCTA | CAACATTTGA |
| Conservation | *****      | *****      | *****      | *****      | *****      | *****      |
|              |            |            |            |            |            |            |
|              | .... ....  | .... ....  | .... ....  | .... ....  | .... ....  | .... ....  |
|              | 4445       | 4455       | 4465       | 4475       | 4485       | 4495       |
| 3_SalI       | AGGAAAAGGG | GGAAGAATCT | GAACCGCAGA | TTGATATGGA | TAAAGTAAGT | TTGAGTGTA  |
| 3_Thai       | AGGAAAAGGG | GGAAGAATCT | GAACCGCAGA | TTGATATGGA | TAAAGTAAGT | TTGAGTGTA  |
| Conservation | *****      | *****      | *****      | *****      | *****      | *****      |
|              |            |            |            |            |            |            |
|              | .... ....  | .... ....  | .... ....  | .... ....  | .... ....  | .... ....  |
|              | 4505       | 4515       | 4525       | 4535       | 4545       | 4555       |
| 3_SalI       | ACCAATGTAT | GACTCAATCA | AATGCCGCTT | CAGCGAGTGA | AGAAGAAATA | AAAAAGCACG |
| 3_Thai       | ACCAATGTAT | GACTCAATCA | AATGCCGCTT | CAGCGAGTGA | AGAAGAAATA | AAAAAGCACG |
| Conservation | *****      | *****      | *****      | *****      | *****      | *****      |
|              |            |            |            |            |            |            |
|              | .... ....  | .... ....  | .... ....  | .... ....  | .... ....  | .... ....  |
|              | 4565       | 4575       | 4585       | 4595       | 4605       | 4615       |
| 3_SalI       | GTAATAGCTA | CGCAGAATAT | GAAGGAAAAA | TGAATACTCT | CTTAAATGAC | ATTTCCGTTT |
| 3_Thai       | GTAATAGCTA | CGCAGAATAT | GAAGGAAAAA | TGAATACTCT | CTTAAATGAC | ATTTCCGTTT |
| Conservation | *****      | *****      | *****      | *****      | *****      | *****      |
|              |            |            |            |            |            |            |
|              | .... ....  | .... ....  | .... ....  | .... ....  | .... ....  | .... ....  |
|              | 4625       | 4635       | 4645       | 4655       | 4665       | 4675       |
| 3_SalI       | TGCAAATAAG | GACCAAGTAT | GCAAAGGGGA | AGGACCAGGC | CACCAGCATC | ATGAGAGAAA |
| 3_Thai       | TGCAAATAAG | GACCAAGTAT | GCAAAGGGGA | AGGACCAGGC | CACCAGCATC | ATGAGAGAAA |
| Conservation | *****      | *****      | *****      | *****      | *****      | *****      |
|              |            |            |            |            |            |            |
|              | .... ....  | .... ....  | .... ....  | .... ....  | .... ....  | .... ....  |
|              | 4685       | 4695       | 4705       | 4715       | 4725       | 4735       |
| 3_SalI       | TCGAACAATT | GCATGCAGGC | ATCCAAGAAA | AACTTAAAGA | ATCTGAAAGA | AAATTAGAAA |
| 3_Thai       | TCGAACAATT | GCATGCAGGC | ATCCNAGAAA | AACTTAAAGA | ATCTGAAAGA | AAATTAGAAA |
| Conservation | *****      | *****      | **** *     | *****      | *****      | *****      |
|              |            |            |            |            |            |            |
|              | .... ....  | .... ....  | .... ....  | .... ....  | .... ....  | .... ....  |
|              | 4745       | 4755       | 4765       | 4775       | 4785       | 4795       |
| 3_SalI       | TGTGGAAGAG | GAAATCCCAA | ATGAATGAAA | GAACAGATAT | ATTGAATAAT | GACAAATCGA |
| 3_Thai       | TGTGGAAGAG | GAAATCCCAA | ATGAATGAAA | GAACAGATAT | ATTGAATAAT | GACAAATCGA |
| Conservation | *****      | *****      | *****      | *****      | *****      | *****      |

|              |            |            |            |            |            |            |
|--------------|------------|------------|------------|------------|------------|------------|
|              | .... ....  | .... ....  | .... ....  | .... ....  | .... ....  | .... ....  |
|              | 4805       | 4815       | 4825       | 4835       | 4845       | 4855       |
| 3_SalI       | AGACGGCATA | CATAAACGTG | AAATTAAATT | TAGAATTAGT | CGAGTCTAAT | TTAGGCCAGA |
| 3_Thai       | AGACGGCATA | CATAAACGTG | AAATTAAATT | TAGAATTAGT | CGAGTCTAAT | TTAGGCCAGA |
| Conservation | *****      | *****      | *****      | *****      | *****      | *****      |
|              | .... ....  | .... ....  | .... ....  | .... ....  | .... ....  | .... ....  |
|              | 4865       | 4875       | 4885       | 4895       | 4905       | 4915       |
| 3_SalI       | TAAAAAGTTT | GAAAGAAAGT | GTGAATAATA | TTCTATCCAA | ATCGACTAAT | TTGAATAGTT |
| 3_Thai       | TAAAAAGTTT | GAAAGAAAGT | GTGAATAATA | TTCTATCCAA | ATCGACTAAT | TTGAATAGTT |
| Conservation | *****      | *****      | *****      | *****      | *****      | *****      |
|              | .... ....  | .... ....  | .... ....  | .... ....  | .... ....  | .... ....  |
|              | 4925       | 4935       | 4945       | 4955       | 4965       | 4975       |
| 3_SalI       | CCATACTAGG | GGCGTATAAA | ATTGAAAGTG | ATAGCTCCTT | AGATGTGCTG | AAAAAGGAAG |
| 3_Thai       | CCATACTAGG | GGCGTATAAA | ATTGAAAGTG | ATAGCTCCTT | AGATGTGCTG | AAAAAGGAAG |
| Conservation | *****      | *****      | *****      | *****      | *****      | *****      |
|              | .... ....  | .... ....  | .... ....  | .... ....  | .... ....  | .... ....  |
|              | 4985       | 4995       | 5005       | 5015       | 5025       | 5035       |
| 3_SalI       | AAATGCATTA | CATGCAGTAT | TTGAAAAATA | TTGAAAATGA | GAAAAAGCTC | ATGACGGAAG |
| 3_Thai       | AAATGCATTA | CATGCAGTAT | TTGAAAAATA | TTGAAAATGA | GAAAAAGCTC | ATGACGGAAG |
| Conservation | *****      | *****      | *****      | *****      | *****      | *****      |
|              | .... ....  | .... ....  | .... ....  | .... ....  | .... ....  | .... ....  |
|              | 5045       | 5055       | 5065       | 5075       | 5085       | 5095       |
| 3_SalI       | AGAAGAGCAA | CATGGATGTG | ATACACGGAA | ATGTCCTTAA | AATAGAAAAT | GAGATGGAGA |
| 3_Thai       | AGAAGAGCAA | CATGGATGTG | ATACACGGAA | ATGTCCTTAA | AATAGAAAAT | GAGATGGAGA |
| Conservation | *****      | *****      | *****      | *****      | *****      | *****      |
|              | .... ....  | .... ....  | .... ....  | .... ....  | .... ....  | .... ....  |
|              | 5105       | 5115       | 5125       | 5135       | 5145       | 5155       |
| 3_SalI       | AATGTAAAAA | AAATTACGAA | GAGAGCATTT | TGAAAAAAGC | CAAAGAAACG | GCTGATAAGA |
| 3_Thai       | AATGTAAAAA | AAATTACGAA | GAGAGCATTT | TGAAAAAAGC | CAAAGAAACG | GCTGATAAGA |
| Conservation | *****      | *****      | *****      | *****      | *****      | *****      |
|              | .... ....  | .... ....  | .... ....  | .... ....  | .... ....  | .... ....  |
|              | 5165       | 5175       | 5185       | 5195       | 5205       | 5215       |
| 3_SalI       | AGAAACAAC  | TATTGAGGCA | ACTAGGGAGT | CGCTAAACTC | CCTGGAGCCA | TACTTTACCG |
| 3_Thai       | AGAAACAAC  | TATTGAGGCA | ACTAGGGAGT | CGCTAAACTC | CCTGGAGCCA | TACTTTACCG |
| Conservation | *****      | *****      | *****      | *****      | *****      | *****      |
|              | .... ....  | .... ....  | .... ....  | .... ....  | .... ....  | .... ....  |
|              | 5225       | 5235       | 5245       | 5255       | 5265       | 5275       |
| 3_SalI       | AGATGTTTAA | TGAATCATAT | TTGAAAGAAT | ACAACATTAA | GGAAAAATTT | GTCGGTTATC |
| 3_Thai       | AGATGTTTAA | TGAATCATAT | TTGAAAGAAT | ACAACATTAA | GGAAAAATTT | GTCGGTTATC |
| Conservation | *****      | *****      | *****      | *****      | *****      | *****      |
|              | .... ....  | .... ....  | .... ....  | .... ....  | .... ....  | .... ....  |
|              | 5285       | 5295       | 5305       | 5315       | 5325       | 5335       |
| 3_SalI       | AAAAGAGCAT | GAAAGGGTTA | TATGACGAAT | TTGGTGAGTC | CTACAAAGTA | ATCGAAACGA |
| 3_Thai       | AAAAGAGCAT | GAAAGGGTTA | TATGACGAAT | TTGGTGAGTC | CTACAAAGTA | ATCGAAACGA |
| Conservation | *****      | *****      | *****      | *****      | *****      | *****      |
|              | .... ....  | .... ....  | .... ....  | .... ....  | .... ....  | .... ....  |
|              | 5345       | 5355       | 5365       | 5375       | 5385       | 5395       |
| 3_SalI       | ACGCTGCAAA | GGTTGCAGAG | GGCACGGTAA | AGTATGATGA | AGCGAGAAGA | CTGAGGGAGG |
| 3_Thai       | ACGCTGCAAA | GGTTGCAGAG | GGCACGGTAA | AGTATGATGA | AGCGAGAAGA | CTGAGGGAGG |
| Conservation | *****      | *****      | *****      | *****      | *****      | *****      |

|              |            |            |            |            |            |            |
|--------------|------------|------------|------------|------------|------------|------------|
|              | .... ....  | .... ....  | .... ....  | .... ....  | .... ....  | .... ....  |
|              | 5405       | 5415       | 5425       | 5435       | 5445       | 5455       |
| 3_SalI       | AAGCTCAAAA | GGCAGAAATA | AATATTAACA | ATAAGGAAGA | AGCTGCAAAA | ACAAATTTGA |
| 3_Thai       | AAGCTCAAAA | GGCAGAAATA | AATATTAACA | ATAAGGAAGA | AGCTGCAAAA | ACAAATTTGA |
| Conservation | *****      | *****      | *****      | *****      | *****      | *****      |
|              | .... ....  | .... ....  | .... ....  | .... ....  | .... ....  | .... ....  |
|              | 5465       | 5475       | 5485       | 5495       | 5505       | 5515       |
| 3_SalI       | ACAAAATAAA | GCAGCATGAA | TTTATGAACT | TTCTATTTCA | TACAAAGGAA | CATGTGGATA |
| 3_Thai       | ACAAAATAAA | GCAGCATGAA | TTTATGAACT | TTCTATTTCA | TACAAAGGAA | CATGTGGATA |
| Conservation | *****      | *****      | *****      | *****      | *****      | *****      |
|              | .... ....  | .... ....  | .... ....  | .... ....  | .... ....  | .... ....  |
|              | 5525       | 5535       | 5545       | 5555       | 5565       | 5575       |
| 3_SalI       | ATATTAAGAA | AGCGTGTGAA | CAAGAAAATA | CCAAAATGGA | CTAAGGACAT | ACCCATATTA |
| 3_Thai       | ATATTAAGAA | AGCGTGTGAA | CAAGAAAATA | CCAAAATGGA | CGAAGGACAT | ACCCATATTA |
| Conservation | *****      | *****      | *****      | *****      | * *****    | *****      |
|              | .... ....  | .... ....  | .... ....  | .... ....  | .... ....  | .... ....  |
|              | 5585       | 5595       | 5605       | 5615       | 5625       | 5635       |
| 3_SalI       | AGCAAATCAT | TATAAACATT | CGAAAGTTAA | CAGACCAGAA | GAGCACTTTC | GAAACGTTAA |
| 3_Thai       | AGCAAATCAT | TATAAACATT | CGAAAGTTAA | CAGACCAGAA | GAGCACTTTC | GAAACGTTAA |
| Conservation | *****      | *****      | *****      | *****      | *****      | *****      |
|              | .... ....  | .... ....  | .... ....  | .... ....  | .... ....  | .... ....  |
|              | 5645       | 5655       | 5665       | 5675       | 5685       | 5695       |
| 3_SalI       | AAATGGCAAA | GGAGAAAAAT | AACGAAATAA | AAAAGAACGC | ACAGCAGTGT | AATAAAAATG |
| 3_Thai       | AAATGGCAAA | GGAGAAAAAT | AACGAAATAA | AAAAGAACGC | ACAGCAGTGT | AATAAAAATG |
| Conservation | *****      | *****      | *****      | *****      | *****      | *****      |
|              | .... ....  | .... ....  | .... ....  | .... ....  | .... ....  | .... ....  |
|              | 5705       | 5715       | 5725       | 5735       | 5745       | 5755       |
| 3_SalI       | AGGTACATAG | CGCCTTTGGG | AAGATGATAA | AAGCGTCTAA | TTTTATGGGG | ATAAAAATAT |
| 3_Thai       | AGGCACATAG | CGCCTTTGGG | AAGATGATAA | AAGCGTCTAA | TTTTATGGGG | ATAAAAATAT |
| Conservation | *** *****  | *****      | *****      | *****      | *****      | *****      |
|              | .... ....  | .... ....  | .... ....  | .... ....  | .... ....  | .... ....  |
|              | 5765       | 5775       | 5785       | 5795       | 5805       | 5815       |
| 3_SalI       | TAACAAACTT | AGGATCCGAG | TTGAGCCCCG | AAATGCACCT | AGAAACTACT | TCACGAACTA |
| 3_Thai       | TAACAAACTT | AGGATCCGAG | TTGAGCCCCG | AAATGCACCT | AGAAACTACT | TCACGAACTA |
| Conservation | *****      | *****      | *****      | *****      | *****      | *****      |
|              | .... ....  | .... ....  | .... ....  | .... ....  | .... ....  | .... ....  |
|              | 5825       | 5835       | 5845       | 5855       | 5865       | 5875       |
| 3_SalI       | ATTCAGAGTT | AAAATTTGAA | TCGGAGGTGG | AAATAAAGTC | GGAAAGTGAT | GCCAAATTAG |
| 3_Thai       | ATTCAGAGTT | AAAATTTGAA | TCGGAGGTGG | AAATAAAGTC | GGAAAGTGAT | GCCAAATTAG |
| Conservation | *****      | *****      | *****      | *****      | *****      | *****      |
|              | .... ....  | .... ....  | .... ....  | .... ....  | .... ....  | .... ....  |
|              | 5885       | 5895       | 5905       | 5915       | 5925       | 5935       |
| 3_SalI       | ATGCCTACAA | AAATCTACAA | GTGGCCTATG | GATATATTCA | AAAAATATTT | AAAGATTCCG |
| 3_Thai       | ATGCCTACAA | AAATCTACAA | GTGGCCTATG | GATATATTCA | AAAAATATTT | AAAGATTCCG |
| Conservation | *****      | *****      | *****      | *****      | *****      | *****      |
|              | .... ....  | .... ....  | .... ....  | .... ....  | .... ....  | .... ....  |
|              | 5945       | 5955       | 5965       | 5975       | 5985       | 5995       |
| 3_SalI       | AGGAGACAGA | GAGGAAACAA | GAAGAAATCG | AAGGGTGGAT | AAGGAAAGGG | AACAATAAAT |
| 3_Thai       | AGGAGACAGA | GAGGAAACAA | GAAGAAATCG | AAGGGTGGAT | AAGGAAAGGG | AACAATAAAT |
| Conservation | *****      | *****      | *****      | *****      | *****      | *****      |

```

      ....|....| ....|....| ....|....| ....|....| ....|....| ....|....|
      6005      6015      6025      6035      6045      6055
3_SalI      GTCACGATAT TAAATCATCT AATGAATTAA AACTAAATT GAAGTACACG AAGTATAAGG
3_Thai      GTCACGATAT TAAATCATCT AATGAATTAA AACTAAATT GAAGTACACG AAGTATAAGG
Conservation *****
      ....|....| ....|....| ....|....| ....|....| ....|....|
      6065      6075      6085      6095      6105      6115
3_SalI      GAAACATTAC TTTAACTAAA ATTAATGACG CTTTGACCAA GTCTGCCCAA TTGAAAGCGA
3_Thai      GAAACATTAC TTTAACTAAA ATTAATGACG CTTTGACCAA GTCTGCCCAA TTGAAAGCGA
Conservation *****
      ....|....| ....|....| ....|....| ....|....| ....|....|
      6125      6135      6145      6155      6165      6175
3_SalI      TGACTTGACG TATTGTGAAC GATAGCAAAA TTATGGAGAG CTCAGAATAT ACAAATTGA
3_Thai      TGACTTGACG TATTGTGAAC GATAGCAAAA TTATGGAGAG CTCAGAATAT ACAAATTGA
Conservation *****
      ....|....| ....|....| ....|....| ....|....| ....|....|
      6185      6195      6205      6215      6225      6235
3_SalI      AGGAGATGAG TGATACGTAC AATCGGAAGA AGAAGGAAGA AGTATCCGAG ACGGAGGTCTG
3_Thai      AGGAGATGAG TGATACGTAC AATCGGAAGA AGAAGGAAGA AGTATCCGAG ACGGAGGTCTG
Conservation *****
      ....|....| ....|....| ....|....| ....|....| ....|....|
      6245      6255      6265      6275      6285      6295
3_SalI      ACGGAATAAA TGAAGAATTC CAAGGGATTA TGAAAAATAT AGAAAGTTTA GAAAAGCAAT
3_Thai      ACGGAATAAA TGAAGAATTC CAAGGGATTA TGAAAAATAT AGAAAGTTTA GAAAAGCAAT
Conservation *****
      ....|....| ....|....| ....|....| ....|....| ....|....|
      6305      6315      6325      6335      6345      6355
3_SalI      TTGAAGCAGT ACAGGAACAA GAATCACCCA GCGAAATGAT TATCGTGGAA AACTCCCTAG
3_Thai      TTGAAGCAGT ACAGGAACAA GAATCACCCA GCGAAATGAT TATCGTGGAA AACTCCCTAG
Conservation *****
      ....|....| ....|....| ....|....| ....|....| ....|....|
      6365      6375      6385      6395      6405      6415
3_SalI      TTACAGAAAT TAATAAAAAA ATAGACAGCA TAAATAGCAG AATTACAACG ATTATGACTA
3_Thai      TTACAGAAAT TAATAAAAAA ATAGACAGCA TAAATAGCAG AATTACAACG ATTATGACTA
Conservation *****
      ....|....| ....|....| ....|....| ....|....| ....|....|
      6425      6435      6445      6455      6465      6475
3_SalI      GTCTTAACGA GTTGCTAGTA ACAGGAAAGG CATGTGAGAA ATCGTCTTAT GCTTCCCTAA
3_Thai      GTCTTAACGA GTTGCTAGTA ACAGGAAAGG CATGTGAGAA ATCGTCTTAT GCTTCCCTAA
Conservation *****
      ....|....| ....|....| ....|....| ....|....| ....|....|
      6485      6495      6505      6515      6525      6535
3_SalI      TTGGTAATAT AAATGCGAAA ACGTCAAGTG ACTTAAGAAT AATCAGTAAC CAAAAGGAAA
3_Thai      TTGGTAATAT AAATGCGAAA ACGTCAAGTG ACTTATGAAT AATCAGTAAC CAAAAGGAAA
Conservation *****
      ....|....| ....|....| ....|....| ....|....| ....|....|
      6545      6555      6565      6575      6585      6595
3_SalI      ACGCGGAAAA GTACGTAGAA TACATTAAGA AAAATTCAAA CTTGATAAAT GATGACATTC
3_Thai      ACGCGGAAAA GTACGTAGAA TACATTAAGA AAAATTCAAA CTTGATAAAT GATGACATTC
Conservation *****

```

```

      ....|....| ....|....| ....|....| ....|....| ....|....| ....|....|
      6605      6615      6625      6635      6645      6655
3_SalI      GTGCATTAAA TAAATACTTT GATACTAATA GGATAAATAA TTACCAGTTG AAAAATTTGG
3_Thai      GTGCATTAAA TAAATACTTT GATACTAATA GGATAAATAA TTACCAGTTG AAAAATTTGG
Conservation *****
      ....|....| ....|....| ....|....| ....|....| ....|....| ....|....|
      6665      6675      6685      6695      6705      6715
3_SalI      AAGAAGTAAT TAAACACGCT AATGATTTTA ACGCAAAGGA AAAAGAAGCA ACGGGAATAG
3_Thai      AAGAAGTAAT TAAACACGCT AATGATTTTA ACGTAAAGGA AAAAGAAGCA ACGGGAATAG
Conservation *****
      ....|....| ....|....| ....|....| ....|....| ....|....| ....|....|
      6725      6735      6745      6755      6765      6775
3_SalI      TTAACGAAAT TAAAAAGAA TTCCTAGACC TAAGTCGGGA GGTAGAAATG AATTTCTTAA
3_Thai      TTAACGAAAT TAAAAAGAA TTCCTAGACC TAAGTCGGGA GGTAGAAATG AATTTCTTAA
Conservation *****
      ....|....| ....|....| ....|....| ....|....| ....|....| ....|....|
      6785      6795      6805      6815      6825      6835
3_SalI      ATAGCAGCAA AGAAAAAATT ATGGAACATT ACAAAAATCT GAAAGATAAA ATAAAGAGCA
3_Thai      ATAGCAGCAA AGAAAAAATT ATGGAACATT ACAAAAATCT GAAAGATAAA ATAAAGAGCA
Conservation *****
      ....|....| ....|....| ....|....| ....|....| ....|....| ....|....|
      6845      6855      6865      6875      6885      6895
3_SalI      TTAACGAAGT TTATAAAAAT ATCAACTTGG TAAAATTGAA AGAAATGGAA AGTAGCTCAG
3_Thai      TTAACGAAGT TTATAAAAAT ATCAACTTGG TAAAATTGAA AGAAATGGAA AGTAGCTCAG
Conservation *****
      ....|....| ....|....| ....|....| ....|....| ....|....| ....|....|
      6905      6915      6925      6935      6945      6955
3_SalI      ATAAGTACTT AGAAATAGCA GGGAAATTTA AAAATGTGCT AGATACTCAA ATAACAAGGC
3_Thai      ATAAGTACTT AGAAATAGCA GGGAAATTTA AAAATGTGCT AGATACTCAA ATAACAAGGC
Conservation *****
      ....|....| ....|....| ....|....| ....|....| ....|....| ....|....|
      6965      6975      6985      6995      7005      7015
3_SalI      TGTTGGATAA TCATATGGTG CTACAAGATA TCGAAAAAAA TATAACAGAA AATGAAGGGG
3_Thai      TGTTGGATAA TCATATGGTG CTACAAGATA TCGAAAAAAA TATAACAGAA AATGAAGGGG
Conservation *****
      ....|....| ....|....| ....|....| ....|....| ....|....| ....|....|
      7025      7035      7045      7055      7065      7075
3_SalI      AACTGAAAGG TATTAGTAAT ACATACACAC TACAGTCCAT CCAAAGTTT AACAATGTGT
3_Thai      AACTGAAAGG TATTAGTAAT ACATACACAC TACAGTCCAT CCAAAGTTT AACAATGTGT
Conservation *****
      ....|....| ....|....| ....|....| ....|....| ....|....| ....|....|
      7085      7095      7105      7115      7125      7135
3_SalI      GTAAGAATAT TGAGACCAAT ATGCAGAAGC TGCATGAAGT AGAGCAGTAG AATAACAGTG
3_Thai      GTAAGAATAT TGAGACCAAT ATGCAGAAGC TGCATGAAGT AGAGCAGTAG AATAACAGTG
Conservation *****
      ....|....| ....|....| ....|....| ....|....| ....|....| ....|....|
      7145      7155      7165      7175      7185      7195
3_SalI      AGGAAAAACA GGTGAAAGCC TGTATAGAAA ATGTGTCCCA TCTTATAAAC AGAGGAAACA
3_Thai      AGGAAAAACA GGTGAAAGCC TGTATAGAAA ATGTGTCCCA TCTTATAAAC AGAGGAAACA
Conservation *****

```

|              |            |            |            |            |            |            |
|--------------|------------|------------|------------|------------|------------|------------|
|              | .... ....  | .... ....  | .... ....  | .... ....  | .... ....  | .... ....  |
|              | 7205       | 7215       | 7225       | 7235       | 7245       | 7255       |
| 3_SalI       | ATTTGTTGAC | CGATTTAAAT | GATTACGATG | TAGTAAGCCA | TAGTGCGGCG | AAAGAAATAA |
| 3_Thai       | ATTTGTTGAC | CGATTTAAAT | GATTACGATG | TAGTAAGCCA | TAGTGCGGCG | AAAGAAATAA |
| Conservation | *****      | *****      | *****      | *****      | *****      | *****      |
|              |            |            |            |            |            |            |
|              | .... ....  | .... ....  | .... ....  | .... ....  | .... ....  | .... ....  |
|              | 7265       | 7275       | 7285       | 7295       | 7305       | 7315       |
| 3_SalI       | CTGATGAGAG | TACAAAAGAG | TACATTACAA | AGATTAAAGG | AAAGGTAAAT | AATACCATAG |
| 3_Thai       | CTGATGAGAG | TACAAAAGAG | TACATTACAA | AGATTAAAGG | AAAGGTAAAT | AATACCATAG |
| Conservation | *****      | *****      | *****      | *****      | *****      | *****      |
|              |            |            |            |            |            |            |
|              | .... ....  | .... ....  | .... ....  | .... ....  | .... ....  | .... ....  |
|              | 7325       | 7335       | 7345       | 7355       | 7365       | 7375       |
| 3_SalI       | AGGCATTTCA | AAAGGTGTTA | GA AACATTC | AGGAAAATAA | ATCGCACACA | CAGAACAATG |
| 3_Thai       | AGGCATTTCA | AAAGGTGTTA | GA AACATTC | AGGAAAATAA | ATCGCACACA | CAGAACAATG |
| Conservation | *****      | *****      | *****      | *****      | *****      | *****      |
|              |            |            |            |            |            |            |
|              | .... ....  | .... ....  | .... ....  | .... ....  | .... ....  | .... ....  |
|              | 7385       | 7395       | 7405       | 7415       | 7425       | 7435       |
| 3_SalI       | GAGATTTAAA | TAAAGGCATA | TACGAAATAT | GGAAAAGGGC | TAACGAAATT | AAGGCAAAC  |
| 3_Thai       | GAGATTTAAA | TAAAGGCATA | TACGAAATAT | GGAAAAGGGC | TAACGAAATT | AAGGCAAAC  |
| Conservation | *****      | *****      | *****      | *****      | *****      | *****      |
|              |            |            |            |            |            |            |
|              | .... ....  | .... ....  | .... ....  | .... ....  | .... ....  | .... ....  |
|              | 7445       | 7455       | 7465       | 7475       | 7485       | 7495       |
| 3_SalI       | TCACGGAAAA | TTTTCCAGAA | AATGATAACT | ACTTTCAGT  | GGGGGATTAT | CTAAAGGATA |
| 3_Thai       | TCACGGAAAA | TTTTCCAGAA | AATGATAACT | ACTTTCAGT  | GGGGGATTAT | CTAAAGGATA |
| Conservation | *****      | *****      | *****      | *****      | *****      | *****      |
|              |            |            |            |            |            |            |
|              | .... ....  | .... ....  | .... ....  | .... ....  | .... ....  | .... ....  |
|              | 7505       | 7515       | 7525       | 7535       | 7545       | 7555       |
| 3_SalI       | TAAAAAACAT | TTTGAACGAA | ACTGTTGGAG | GTGCCAACAT | AGAGGAATAT | ATCAAAAGCG |
| 3_Thai       | TAAAAAACAT | TTTGAACGAA | ACTGTTGGAG | GTGCCAACAT | AGAGGAATAT | ATCAAAAGCG |
| Conservation | *****      | *****      | *****      | *****      | *****      | *****      |
|              |            |            |            |            |            |            |
|              | .... ....  | .... ....  | .... ....  | .... ....  | .... ....  | .... ....  |
|              | 7565       | 7575       | 7585       | 7595       | 7605       | 7615       |
| 3_SalI       | TTTCTCAAAA | TATTGAAGAA | CAAATAAAGG | GTACACAAAA | TCATCGTAAT | GTGGAATCCA |
| 3_Thai       | TTTCTCAAAA | TATTGAAGAA | CAAATAAAGG | GTACACAAAA | TCATCGTAAT | GTGGAATCCA |
| Conservation | *****      | *****      | *****      | *****      | *****      | *****      |
|              |            |            |            |            |            |            |
|              | .... ....  | .... ....  | .... ....  | .... ....  | .... ....  | .... ....  |
|              | 7625       | 7635       | 7645       | 7655       | 7665       | 7675       |
| 3_SalI       | TTTTAAAAGC | CAAAAAAAG  | ATTCAATCTT | ATAATGAAGA | GGCAAACAAA | ACATTACAAT |
| 3_Thai       | TTTTAAAAGC | CAAAAAAAG  | ATTCAATCTT | ATAATGAAGA | GGCAAACAAA | ACATTACAAT |
| Conservation | *****      | *****      | *****      | *****      | *****      | *****      |
|              |            |            |            |            |            |            |
|              | .... ....  | .... ....  | .... ....  | .... ....  | .... ....  | .... ....  |
|              | 7685       | 7695       | 7705       | 7715       | 7725       | 7735       |
| 3_SalI       | CTATGAACAC | TGCTCAGGAT | AAAATTTTGT | TAAAGAAAAA | AGACATGGAT | AATATATTTA |
| 3_Thai       | CTATGAACAC | TGCTCAGGAT | AAAATTTTGT | TAAAGAAAAA | AGACATGGAT | AATATATTTA |
| Conservation | *****      | *****      | *****      | *****      | *****      | *****      |
|              |            |            |            |            |            |            |
|              | .... ....  | .... ....  | .... ....  | .... ....  | .... ....  | .... ....  |
|              | 7745       | 7755       | 7765       | 7775       | 7785       | 7795       |
| 3_SalI       | GTATTCTATC | CGTAAATATG | AAGAATAGTG | TGTACATAAA | TACGAAAAAA | TATATTAACG |
| 3_Thai       | GTATTCTATC | CGTAAATATG | AAGAATAGTG | TGTACATAAA | TACGAAAAAA | TATATTAACG |
| Conservation | *****      | *****      | *****      | *****      | *****      | *****      |

|              |            |            |            |             |            |            |
|--------------|------------|------------|------------|-------------|------------|------------|
|              | .... ....  | .... ....  | .... ....  | .... ....   | .... ....  | .... ....  |
|              | 7805       | 7815       | 7825       | 7835        | 7845       | 7855       |
| 3_SalI       | AGGTGGATGA | TTTATTTAAC | AAGTAAAAAG | TGGATGTACA  | TAAGTTGGAA | AATTTTATAA |
| 3_Thai       | AGGTGGATGA | TTTATTTAAC | AAGTAAAAAG | TGGATGTACA  | TAAGTTGGAA | AATTTTATAA |
| Conservation | *****      | *****      | *****      | *****       | *****      | *****      |
|              |            |            |            |             |            |            |
|              | .... ....  | .... ....  | .... ....  | .... ....   | .... ....  | .... ....  |
|              | 7865       | 7875       | 7885       | 7895        | 7905       | 7915       |
| 3_SalI       | ATGATACTGA | ACTGAGAATA | AAGCAGTTAG | AGGAAGAGGA  | AGCTAAGCTC | AAAATTAAGA |
| 3_Thai       | ATGATACTGA | ACTGAGAATA | AAGCAGTTAG | AGGAAGAGGA  | AGCTAAGCTC | AAAATTAAGA |
| Conservation | *****      | *****      | *****      | *****       | *****      | *****      |
|              |            |            |            |             |            |            |
|              | .... ....  | .... ....  | .... ....  | .... ....   | .... ....  | .... ....  |
|              | 7925       | 7935       | 7945       | 7955        | 7965       | 7975       |
| 3_SalI       | ATGCAGTTAA | TGGTGATTG  | AATGAGCATT | CTGAGGATGC  | TTCTCGTGAT | GAGGACGACG |
| 3_Thai       | ATGCAGTTAA | TGGTGATTG  | AATGAGCATT | CTGAGGATGC  | TTCTCGTGAT | GAGGACGACG |
| Conservation | *****      | *****      | *****      | *****       | *****      | *****      |
|              |            |            |            |             |            |            |
|              | .... ....  | .... ....  | .... ....  | .... ....   | .... ....  | .... ....  |
|              | 7985       | 7995       | 8005       | 8015        | 8025       | 8035       |
| 3_SalI       | AACCATTAGG | TGAGGTTACG | CAAAATTCAG | ATTTCGGAAGG | GTCAAGTGAT | AACCAAAATA |
| 3_Thai       | AACCATTAGG | TGAGGTTACG | CAAAATTCAG | ATTTCGGAAGG | GTCAAGTGAT | AACCAAAATA |
| Conservation | *****      | *****      | *****      | *****       | *****      | *****      |
|              |            |            |            |             |            |            |
|              | .... ....  | .... ....  | .... ....  | .... ....   | .... ....  | .... ....  |
|              | 8045       | 8055       | 8065       | 8075        | 8085       | 8095       |
| 3_SalI       | GGCGTAAACG | AAATGGTGCA | AGTAGCCATT | CAAAAGGAAA  | TTCTTCTAAT | AACTCTTTGA |
| 3_Thai       | GGCGTAAACG | AAATGGTGCA | AGTAGCCATT | CAAAAGGAAA  | TTCTTCTAAT | AACTCTTTGA |
| Conservation | *****      | *****      | *****      | *****       | *****      | *****      |
|              |            |            |            |             |            |            |
|              | .... ....  | .... ....  | .... ....  | .... ....   | .... ....  | .... ....  |
|              | 8105       | 8115       | 8125       | 8135        | 8145       | 8155       |
| 3_SalI       | ATAATGTGCA | TGGATTAAAA | GAAGATAATA | AAACTGGTGA  | CAACCATTCT | GATGACAATC |
| 3_Thai       | ATAATGTGCA | TGGATTAAAA | GAAGATAATA | AAACTGGTGA  | CAACCATTCT | GATGACAATC |
| Conservation | *****      | *****      | *****      | *****       | *****      | *****      |
|              |            |            |            |             |            |            |
|              | .... ....  | .... ....  | .... ....  | .... ....   | .... ....  | .... ....  |
|              | 8165       | 8175       | 8185       | 8195        | 8205       | 8215       |
| 3_SalI       | AGAAAGAAGA | ATCTCATAAT | GGAAGTAATA | ATTTCGGGTGG | AAAAGGCTCA | CGGGAGAGGT |
| 3_Thai       | AGAAAGAAGA | ATCTCATAAT | GGAAGTAATA | ATTTCGGGTGG | AAAAGGCTCA | CGGGAGAGGT |
| Conservation | *****      | *****      | *****      | *****       | *****      | *****      |
|              |            |            |            |             |            |            |
|              | .... ....  | .... ....  | .... ....  | .... ....   | .... ....  | .... ....  |
|              | 8225       | 8235       | 8245       | 8255        | 8265       | 8275       |
| 3_SalI       | TCAGATATGC | TGGAGGAATT | ACGCTAGCAT | TTTTTATTTG  | CTCAAGTGCT | GGATTCGCAA |
| 3_Thai       | TCAGATATGC | TGGAGGAATT | ACGCTAGCAT | TTTTTATTTG  | CTCAAGTGCT | GGATTCGCAA |
| Conservation | *****      | *****      | *****      | *****       | *****      | *****      |
|              |            |            |            |             |            |            |
|              | .... ....  | .... ....  | .... ....  | .... ....   | .... ....  | .... ....  |
|              | 8285       | 8295       | 8305       | 8315        | 8325       | 8335       |
| 3_SalI       | TCATTAAATA | TAAAAATCAT | GAATCACAAG | AAGCCGATTT  | CGGAACAGAC | AAGGAGCACT |
| 3_Thai       | TCATTAAATA | TAAAAATCAT | GAATCACAAG | AAGCCGATTT  | CGGAACAGAC | AAGGAGCACT |
| Conservation | *****      | *****      | *****      | *****       | *****      | *****      |
|              |            |            |            |             |            |            |
|              | .... ....  | .... ....  | .... ....  | .... ....   | .... ....  | .... ....  |
|              | 8345       | 8355       | 8365       | 8375        | 8385       | 8395       |
| 3_SalI       | TTGAGGGGGA | TAAAGATTTT | AATAAACGGG | AAAAGGAGGA  | AATTATTGAA | GTTTCTTTTA |
| 3_Thai       | TTGAGGGGGA | TAAAGATTTT | AATAAACGGG | AAAAGGAGGA  | AATTATTGAA | GTTTCTTTTA |
| Conservation | *****      | *****      | *****      | *****       | *****      | *****      |

```
      ....|....| ....|....| ...
      8405      8415
3_SalI  ACGAAAATGA ACACTATGAA TGA
3_Thai  ACGAAAATGA ACACTATGAA TGA
Conservation ***** **
```
